# Supplementary material
Source: Research Square preprint supplement (doi:10.21203/rs.3.rs-9835208/v1)
Supplement: Supplementary file 1 [file 00fe92a3175e2363d3831681.xlsx]

## Sheet: Sheet1
Supplementary Table 2. The detailed information of mitochondrial genome
Phylum	Class	Order	Family	Genus	Species	Accession	Length(bp)	A-homopolymers	T-homopolymers	C-homopolymers	G-homopolymers
Chordata	Mammalia	Artiodactyla	Balaenopteridae	Balaenoptera	Balaenoptera physalus	X61145.1	16398	4A:76, 5A:35, 6A:10, 7A:4, 8A:1	4T:38, 5T:8, 6T:2, 7T:1, 8T:1	4C:57, 5C:18, 6C:6	4G:7, 5G:2, 6G:1
Chordata	Mammalia	Primates	Hominidae	Homo	Homo sapiens	V00662.1	16569	4A:69, 5A:24, 6A:12, 7A:6, 8A:1	4T:36, 5T:7, 6T:3, 7T:1	4C:99, 5C:45, 6C:10, 7C:1	4G:8, 5G:2, 6G:1
Arthropoda	Insecta	Diptera	Culicidae	Anopheles	Anopheles gambiae	L20934.1	15363	4A:127, 5A:62, 6A:32, 7A:13, 8A:6, 9A:2, 11A:1	4T:150, 5T:61, 6T:26, 7T:5, 8T:3, 9T:1, 10T:2, 17T:1	4C:11, 5C:2, 6C:1, 7C:1	4G:2, 5G:2
Chordata	Mammalia	Rodentia	Muridae	Mus	Mus musculus	J01420.1	16295	4A:101, 5A:32, 6A:10, 7A:7, 8A:2, 11A:1	4T:61, 5T:12, 6T:1	4C:38, 5C:10, 6C:3, 7C:1	4G:5, 5G:3
Chordata	Mammalia	Carnivora	Phocidae	Halichoerus	Halichoerus grypus	X72004.1	16797	4A:72, 5A:35, 6A:13, 7A:1, 8A:2	4T:29, 5T:9, 6T:1, 7T:1	4C:62, 5C:15, 6C:5, 7C:1	4G:6, 5G:6, 6G:1
Chordata	Actinopteri	Cypriniformes	Cyprinidae	Cyprinus	Cyprinus carpio	X61010.1	16575	4A:86, 5A:31, 6A:7, 7A:2	4T:54, 5T:5, 6T:2, 7T:2	4C:60, 5C:24, 6C:7	4G:10, 5G:5
Chordata	Mammalia	Didelphimorphia	Didelphidae	Didelphis	Didelphis virginiana	Z29573.1	17084	4A:104, 5A:39, 6A:5, 7A:7, 8A:4, 9A:1, 10A:1	4T:77, 5T:22, 6T:8, 7T:2, 8T:3	4C:28, 5C:10, 6C:2, 9C:1	4G:11, 7G:1, 8G:2, 9G:1
Arthropoda	Branchiopoda	Anostraca	Artemiidae	Artemia	Artemia franciscana	X69067.1	15822	4A:77, 5A:21, 6A:8, 7A:4, 9A:2	4T:95, 5T:39, 6T:19, 7T:4, 8T:1	4C:36, 5C:15, 6C:2, 7C:1, 13C:1	4G:27, 5G:5, 6G:3, 13G:1
Echinodermata	Asteroidea	Valvatida	Asterinidae	Patiria	Patiria pectinifera	D16387.1	16260	4A:109, 5A:38, 6A:21, 7A:5, 8A:2, 19A:1	4T:71, 5T:33, 6T:14, 8T:1	4C:53, 5C:16, 6C:10, 8C:1, 9C:1	4G:15, 5G:3, 6G:1
Chordata	Mammalia	Primates	Hominidae	Gorilla	Gorilla gorilla	X93347.1	16412	4A:68, 5A:24, 6A:14, 7A:7	4T:31, 5T:12, 6T:6	4C:90, 5C:42, 6C:10, 7C:1, 8C:1, 10C:1, 13C:1	4G:8, 5G:2, 6G:1
Chordata	Mammalia	Monotremata	Ornithorhynchidae	Ornithorhynchus	Ornithorhynchus anatinus	X83427.1	17019	4A:84, 5A:38, 6A:16, 7A:7, 10A:1	4T:113, 5T:23, 6T:15, 7T:1, 8T:2, 9T:1, 10T:1, 17T:1	4C:46, 5C:13, 6C:1, 8C:2, 12C:1	4G:15, 5G:3
Chordata	Actinopteri	Gadiformes	Gadidae	Gadus	Gadus morhua	X99772.1	16696	4A:70, 5A:25, 6A:4, 7A:2	4T:72, 5T:33, 6T:7, 7T:1, 8T:1, 9T:1	4C:66, 5C:27, 6C:6, 7C:1, 11C:1	4G:23, 5G:14
Chordata	Cladistia	Polypteriformes	Polypteridae	Polypterus	Polypterus ornatipinnis	U62532.1	16624	4A:80, 5A:27, 6A:11, 7A:2	4T:55, 5T:17, 6T:1	4C:45, 5C:12, 6C:5, 7C:1, 8C:1	4G:11, 5G:2, 6G:1
Chordata	Mammalia	Perissodactyla	Rhinocerotidae	Rhinoceros	Rhinoceros unicornis	X97336.1	16829	4A:82, 5A:38, 6A:10, 7A:5	4T:37, 5T:7, 6T:4	4C:63, 5C:17, 6C:3, 7C:2, 11C:1	4G:8, 5G:4
Chordata	Mammalia	Primates	Hominidae	Pongo	Pongo abelii	X97707.1	16499	4A:75, 5A:20, 6A:10, 7A:5, 8A:2, 9A:1	4T:30, 5T:6, 6T:3, 7T:1	4C:102, 5C:47, 6C:7, 7C:6, 13C:2	4G:7, 5G:3, 8G:1
Chordata	Mammalia	Perissodactyla	Rhinocerotidae	Ceratotherium	Ceratotherium simum	Y07726.1	16832	4A:90, 5A:38, 6A:9, 7A:5, 8A:1	4T:38, 5T:9, 6T:3	4C:60, 5C:18, 6C:4, 7C:1	4G:7, 5G:5
Chordata	Mammalia	Cingulata	Dasypodidae	Dasypus	Dasypus novemcinctus	Y11832.1	17056	4A:78, 5A:37, 6A:8, 7A:5	4T:51, 5T:5, 6T:4, 8T:2, 9T:4, 10T:1, 12T:1	4C:49, 5C:15, 6C:3, 8C:2	4G:8, 5G:4, 10G:1
Cnidaria	Anthozoa	Actiniaria	Metridiidae	Metridium	Metridium senile	AF000023.1	17443	4A:80, 5A:28, 6A:9, 7A:4, 8A:2	4T:133, 5T:71, 6T:19, 7T:9, 8T:4, 9T:2	4C:33, 5C:14, 6C:3	4G:56, 5G:15, 6G:1
Chordata	Lepidosauria	Squamata	Colubridae	Lycodon	Lycodon semicarinatus	AB008539.1	17191	4A:91, 5A:36, 6A:16, 7A:7, 8A:3, 9A:2	4T:34, 5T:18, 6T:2	4C:68, 5C:21, 6C:7, 7C:2, 9C:4	4G:16, 5G:5, 6G:1
Chordata	Mammalia	Primates	Cercopithecidae	Papio	Papio hamadryas	Y18001.1	16521	4A:78, 5A:29, 6A:5, 7A:5, 8A:1	4T:39, 5T:9, 6T:2	4C:88, 5C:25, 6C:11, 7C:3, 9C:1, 12C:1	4G:11, 5G:5, 6G:1
Chordata	Mammalia	Chiroptera	Phyllostomidae	Artibeus	Artibeus jamaicensis	AF061340.1	16651	4A:79, 5A:30, 6A:7, 7A:1, 8A:1	4T:62, 5T:14, 6T:3, 8T:1	4C:56, 5C:15, 6C:4	4G:7, 5G:5, 6G:1
Chordata	Mammalia	Tubulidentata	Orycteropodidae	Orycteropus	Orycteropus afer	Y18475.1	16816	4A:86, 5A:37, 6A:12, 7A:4, 9A:1	4T:50, 5T:16, 6T:1, 7T:1, 9T:1	4C:41, 5C:9, 6C:5	4G:7, 5G:3
Chordata	Aves	Passeriformes	Corvidae	Corvus	Corvus frugilegus	Y18522.2	16931	4A:76, 5A:24, 6A:7, 7A:2, 10A:1	4T:28, 5T:14, 6T:3, 8T:1, 13T:1	4C:62, 5C:17, 6C:8, 8C:1, 14C:1	4G:11, 5G:4
Arthropoda	Insecta	Diptera	Tephritidae	Ceratitis	Ceratitis capitata	AJ242872.1	15980	4A:161, 5A:74, 6A:26, 7A:13, 8A:4, 9A:2, 10A:3, 11A:1, 21A:1	4T:156, 5T:69, 6T:22, 7T:9, 8T:4, 9T:2, 10T:2, 21T:1	4C:15, 5C:8, 7C:1	4G:3, 5G:1
Chordata	Lepidosauria	Squamata	Scincidae	Plestiodon	Plestiodon egregius	AB016606.1	17407	4A:94, 5A:25, 6A:5, 7A:4, 9A:1	4T:84, 5T:20, 6T:6, 8T:2	4C:53, 5C:40, 6C:13, 7C:2	4G:24, 5G:9, 6G:5, 7G:1
Chordata	Actinopteri	Stomiiformes	Gonostomatidae	Sigmops	Sigmops gracilis	AB016274.1	16436	4A:63, 5A:28, 6A:4	4T:39, 5T:15, 6T:2	4C:107, 5C:74, 6C:16, 7C:1, 8C:2, 9C:2, 10C:1	4G:25, 5G:8, 6G:4
Chordata	Mammalia	Rodentia	Caviidae	Cavia	Cavia porcellus	AJ222767.1	16801	4A:76, 5A:33, 6A:12, 7A:3, 8A:1, 9A:1	4T:72, 5T:12, 6T:3	4C:33, 5C:13, 6C:5, 7C:1	4G:19, 5G:4, 6G:1
Annelida	Polychaeta	Phyllodocida	Nereididae	Platynereis	Platynereis dumerilii	AF178678.1	15619	4A:71, 5A:11, 6A:2, 7A:2, 8A:2, 10A:1	4T:88, 5T:33, 6T:6, 7T:8	4C:46, 5C:11, 6C:2	4G:12, 5G:9, 6G:2
Brachiopoda	Rhynchonellata	Terebratulida	Cancellothyrididae	Terebratulina	Terebratulina retusa	AJ245743.1	15451	4A:78, 5A:54, 6A:12, 7A:7, 8A:2	4T:54, 5T:28, 6T:2	4C:95, 5C:30, 6C:13, 7C:4, 8C:1	4G:28, 5G:6, 6G:1, 7G:1, 8G:1, 14G:1
Chordata	Hyperoartia	Petromyzontiformes	Petromyzontidae	Lampetra	Lampetra fluviatilis	Y18683.1	16159	4A:85, 5A:25, 6A:6, 7A:5, 8A:1	4T:88, 5T:20, 6T:9, 7T:1, 9T:1, 10T:1, 11T:1, 12T:1	4C:48, 5C:24, 6C:3, 8C:1	4G:18, 5G:2, 7G:1, 8G:1
Chordata	Actinopteri	Pleuronectiformes	Paralichthyidae	Paralichthys	Paralichthys olivaceus	AB028664.1	17090	4A:63, 5A:23, 6A:2	4T:57, 5T:12, 6T:1, 7T:1, 10T:1	4C:83, 5C:44, 6C:8, 7C:1, 8C:1	4G:17, 5G:14, 6G:2, 7G:1
Chordata	Mammalia	Eulipotyphla	Talpidae	Talpa	Talpa europaea	Y19192.1	16884	4A:82, 5A:39, 6A:7, 7A:5	4T:49, 5T:9, 6T:5	4C:42, 5C:8, 6C:1	4G:8, 5G:7
Arthropoda	Merostomata	Xiphosura	Limulidae	Limulus	Limulus polyphemus	AF216203.1	14985	4A:132, 5A:76, 6A:40, 7A:13, 8A:6, 9A:3	4T:80, 5T:23, 6T:10, 7T:3, 8T:1	4C:39, 5C:17, 6C:5, 7C:2	4G:5, 5G:4
Chordata	Mammalia	Rodentia	Sciuridae	Sciurus	Sciurus vulgaris	AJ238588.1	16507	4A:70, 5A:26, 6A:8, 7A:6, 8A:1	4T:56, 5T:17, 6T:5, 7T:2	4C:49, 5C:12, 6C:2	4G:6, 5G:4
Mollusca	Cephalopoda	Myopsida	Loliginidae	Heterololigo	Heterololigo bleekeri	AB029616.1	17211	4A:118, 5A:57, 6A:23, 7A:12, 8A:5, 9A:4	4T:106, 5T:32, 6T:9, 7T:2, 8T:2	4C:49, 5C:14, 6C:3, 7C:1	4G:7, 5G:2, 7G:1, 8G:1
Arthropoda	Insecta	Hemiptera	Reduviidae	Triatoma	Triatoma dimidiata	AF301594.1	17019	4A:180, 5A:74, 6A:36, 7A:21, 8A:4, 9A:2	4T:52, 5T:13, 6T:6, 7T:1	4C:34, 5C:8, 6C:3, 7C:2	4G:9, 5G:6, 13G:1
Chordata	Mammalia	Chiroptera	Pteropodidae	Pteropus	Pteropus scapulatus	AF321050.1	16741	4A:85, 5A:36, 6A:8, 7A:3, 8A:1	4T:39, 5T:9, 6T:1	4C:54, 5C:12, 6C:1, 7C:2	4G:13, 5G:2
Chordata	Mammalia	Chiroptera	Vespertilionidae	Chalinolobus	Chalinolobus tuberculatus	AF321051.1	16818	4A:80, 5A:46, 6A:4, 7A:1, 8A:1	4T:58, 5T:19, 6T:5, 7T:2	4C:44, 5C:18, 6C:3	4G:11, 5G:3
Chordata	Myxini	Myxiniformes	Myxinidae	Myxine	Myxine glutinosa	AJ404477.1	18909	4A:116, 5A:46, 6A:10, 7A:2, 8A:1	4T:123, 5T:54, 6T:17, 7T:8, 8T:1	4C:71, 5C:30, 6C:6, 7C:1, 8C:3, 10C:2	4G:29, 5G:7, 6G:7, 7G:2
Arthropoda	Insecta	Diptera	Calliphoridae	Cochliomyia	Cochliomyia hominivorax	NC_002660.1	16022	4A:137, 5A:68, 6A:28, 7A:8, 8A:8, 9A:1, 10A:1, 23A:1	4T:146, 5T:61, 6T:15, 7T:3, 8T:1, 9T:1, 25T:1	4C:20, 5C:6, 6C:1	4G:3
Chordata	Aves	Tinamiformes	Tinamidae	Crypturellus	Crypturellus tataupa	AY016012.1	12205	4A:43, 5A:12, 6A:5, 7A:1	4T:39, 5T:8, 6T:2	4C:45, 5C:25, 6C:4	4G:6, 5G:1
Chordata	Aves	Dinornithiformes	Dinornithidae	Dinornis	Dinornis giganteus	NC_002672.1	17070	4A:92, 5A:22, 6A:4, 7A:3, 9A:1	4T:18, 5T:7, 6T:1, 9T:2, 14T:1	4C:67, 5C:46, 6C:13, 7C:2, 8C:1	4G:17, 5G:2
Chordata	Aves	Dinornithiformes	Emeidae	Emeus	Emeus crassus	NC_002673.1	17061	4A:92, 5A:22, 6A:2, 7A:4, 9A:1	4T:27, 5T:3, 6T:1, 9T:2, 11T:1, 15T:1	4C:69, 5C:46, 6C:13, 7C:2, 8C:1	4G:19, 5G:3, 6G:1, 9G:1, 13G:1
Chordata	Actinopteri	Acipenseriformes	Acipenseridae	Acipenser	Acipenser transmontanus	AB042837.1	16692	4A:75, 5A:29, 6A:4, 7A:1, 8A:1	4T:44, 5T:13, 6T:3	4C:67, 5C:44, 6C:15	4G:24, 5G:8, 6G:1
Chordata	Actinopteri	Semionotiformes	Lepisosteidae	Lepisosteus	Lepisosteus oculatus	AB042861.1	16330	4A:63, 5A:36, 6A:3, 7A:1	4T:49, 5T:17, 6T:3, 7T:2	4C:64, 5C:26, 6C:9, 8C:1	4G:15, 5G:4
Chordata	Actinopteri	Amiiformes	Amiidae	Amia	Amia calva	AB042952.1	16210	4A:66, 5A:30, 6A:5, 7A:3	4T:37, 5T:8, 6T:1	4C:63, 5C:40, 6C:5, 7C:2	4G:17, 5G:5, 6G:2
Arthropoda	Collembola	Poduromorpha	Onychiuridae	Tetrodontophora	Tetrodontophora bielanensis	NC_002735.1	15455	4A:138, 5A:46, 6A:21, 7A:9, 8A:2, 9A:1, 10A:3	4T:106, 5T:31, 6T:12, 7T:1	4C:33, 5C:13, 6C:6, 7C:3, 8C:1	4G:4
Chordata	Mammalia	Peramelemorphia	Peramelidae	Isoodon	Isoodon macrourus	NC_002746.1	16852	4A:90, 5A:36, 6A:9, 7A:2, 8A:1, 11A:1	4T:77, 5T:18, 6T:6, 7T:2	4C:37, 5C:10, 6C:1, 7C:1	4G:7, 5G:5, 10G:1
Chordata	Amphibia	Caudata	Salamandridae	Lyciasalamandra	Lyciasalamandra atifi	NC_002756.1	16650	4A:87, 5A:37, 6A:9, 7A:2, 8A:2, 10A:1	4T:60, 5T:25, 6T:10, 7T:1, 9T:1	4C:47, 5C:16, 6C:4, 7C:4, 8C:1, 14C:1	4G:14, 5G:10, 6G:1, 7G:1
Chordata	Mammalia	Primates	Cebidae	Cebus	Cebus albifrons	AJ309866.1	16554	4A:84, 5A:28, 6A:7, 7A:5, 8A:1	4T:46, 5T:9, 6T:4, 8T:2	4C:58, 5C:22, 6C:7	4G:9, 5G:1, 6G:1, 9G:1
Chordata	Mammalia	Primates	Lorisidae	Nycticebus	Nycticebus coucang	AJ309867.1	16764	4A:75, 5A:33, 6A:5, 7A:4, 8A:1	4T:51, 5T:12, 6T:2, 8T:1	4C:78, 5C:15, 6C:8	4G:9, 5G:3
Chordata	Aves	Casuariiformes	Dromaiidae	Dromaius	Dromaius novaehollandiae	NC_002784.1	16711	4A:83, 5A:27, 6A:5, 7A:3	4T:25, 5T:8, 6T:1, 7T:2, 10T:2	4C:65, 5C:29, 6C:5, 8C:2	4G:12, 5G:6
Chordata	Aves	Dinornithiformes	Emeidae	Anomalopteryx	Anomalopteryx didiformis	NC_002779.1	16716	4A:94, 5A:22, 6A:3, 7A:3, 9A:1	4T:26, 5T:5, 6T:2, 9T:1, 15T:1	4C:60, 5C:49, 6C:12	4G:14, 5G:2
Chordata	Lepidosauria	Squamata	Iguanidae	Iguana	Iguana iguana	AJ278511.2	16633	4A:97, 5A:44, 6A:7, 7A:5	4T:31, 5T:12, 6T:6, 8T:1	4C:80, 5C:37, 6C:15, 7C:3, 8C:1, 10C:2, 12C:1	4G:14, 5G:3, 7G:1
Chordata	Amphibia	Anura	Ranidae	Pelophylax	Pelophylax nigromaculatus	AB043889.1	17804	4A:67, 5A:27, 6A:5, 7A:3	4T:73, 5T:22, 6T:6, 7T:2, 9T:1, 10T:1	4C:71, 5C:30, 6C:8, 7C:3, 8C:4, 14C:1	4G:23, 5G:5, 6G:3
Chordata	Mammalia	Primates	Tarsiidae	Cephalopachus	Cephalopachus bancanus	AF348159.1	16927	4A:83, 5A:34, 6A:8, 7A:4, 8A:2	4T:45, 5T:13, 6T:3	4C:68, 5C:27, 6C:8, 10C:1	4G:7, 5G:4, 9G:1
Chordata	Actinopteri	Perciformes	Trichodontidae	Arctoscopus	Arctoscopus japonicus	AP003090.1	16577	4A:53, 5A:21, 6A:3	4T:59, 5T:18, 6T:4, 7T:1, 8T:1, 9T:1	4C:82, 5C:38, 6C:13	4G:28, 5G:15, 6G:1, 7G:1
Chordata	Mammalia	Diprotodontia	Phalangeridae	Trichosurus	Trichosurus vulpecula	NC_003039.1	17191	4A:84, 5A:37, 6A:8, 7A:4, 8A:2, 9A:1	4T:46, 5T:15, 6T:2, 7T:1, 9T:1	4C:35, 5C:9, 6C:2, 7C:2	4G:5, 7G:1
Arthropoda	Malacostraca	Decapoda	Paguridae	Pagurus	Pagurus longicarpus	NC_003058.1	15630	4A:140, 5A:39, 6A:14, 7A:5, 8A:2, 9A:1	4T:146, 5T:43, 6T:15, 7T:3, 8T:1, 9T:2	4C:20, 5C:7, 6C:2	4G:2, 5G:2
Brachiopoda	Rhynchonellata	Terebratulida	Laqueidae	Terebratalia	Terebratalia transversa	NC_003086.1	14291	4A:24, 5A:13, 6A:2	4T:167, 5T:60, 6T:30, 7T:14, 8T:9, 9T:5, 10T:2	4C:8, 5C:8, 6C:1, 7C:1, 8C:2	4G:92, 5G:42, 6G:22, 7G:19, 8G:4, 9G:3, 10G:2, 11G:1
Chordata	Mammalia	Chiroptera	Rhinolophidae	Rhinolophus	Rhinolophus monoceros	AF406806.1	16851	4A:76, 5A:33, 6A:6, 7A:2, 10A:1	4T:30, 5T:8, 6T:1	4C:64, 5C:20, 6C:6, 8C:1, 10C:1	4G:15, 5G:4
Chordata	Actinopteri	Osteoglossiformes	Osteoglossidae	Osteoglossum	Osteoglossum bicirrhosum	AB043025.1	16006	4A:76, 5A:35, 6A:5, 7A:3, 8A:1	4T:43, 5T:13, 7T:1	4C:50, 5C:30, 6C:3	4G:14, 5G:2
Arthropoda	Chilopoda	Lithobiomorpha	Lithobiidae	Lithobius	Lithobius forficatus	AJ270997.1	15437	4A:130, 5A:69, 6A:17, 7A:10, 8A:2, 9A:1	4T:83, 5T:31, 6T:11, 7T:4, 8T:1	4C:45, 5C:23, 6C:4, 7C:2, 8C:1	4G:10, 5G:2, 6G:1, 7G:1
Arthropoda	Insecta	Coleoptera	Tenebrionidae	Tribolium	Tribolium castaneum	AJ312413.2	15881	4A:131, 5A:87, 6A:25, 7A:14, 8A:9, 9A:3, 10A:1, 11A:1, 12A:1	4T:94, 5T:23, 6T:9, 7T:3, 9T:1, 14T:1	4C:40, 5C:11, 7C:1, 8C:1	4G:4, 5G:2, 6G:2
Chordata	Chondrichthyes	Chimaeriformes	Chimaeridae	Chimaera	Chimaera monstrosa	AJ310140.1	18580	4A:119, 5A:71, 6A:17, 7A:11, 8A:1, 9A:1	4T:96, 5T:23, 6T:21, 7T:5, 8T:2, 10T:2, 11T:1	4C:65, 5C:33, 6C:8, 7C:4	4G:15, 5G:7, 6G:3
Chordata	Chondrichthyes	Heterodontiformes	Heterodontidae	Heterodontus	Heterodontus francisci	AJ310141.1	16708	4A:79, 5A:42, 6A:6, 7A:6, 8A:2	4T:58, 5T:11, 6T:3	4C:46, 5C:26, 6C:5, 7C:1	4G:5, 5G:2
Chordata	Actinopteri	Gadiformes	Macrouridae	Coelorinchus	Coelorinchus kishinouyei	AP002929.1	15942	4A:78, 5A:22, 6A:7, 7A:3, 8A:1	4T:65, 5T:21, 6T:11, 7T:4, 8T:3	4C:85, 5C:27, 6C:8, 7C:1	4G:19, 5G:14, 6G:2
Chordata	Actinopteri	Mugiliformes	Mugilidae	Mugil	Mugil cephalus	AP002931.1	16019	4A:66, 5A:25, 6A:8, 7A:3	4T:43, 5T:11, 6T:5, 7T:1	4C:84, 5C:33, 6C:16	4G:16, 5G:6
Chordata	Actinopteri	Pleuronectiformes	Pleuronectidae	Kareius	Kareius bicoloratus	AP002951.1	15973	4A:57, 5A:21, 6A:4	4T:49, 5T:9, 6T:5	4C:64, 5C:38, 6C:11	4G:31, 5G:12, 6G:6
Chordata	Mammalia	Chiroptera	Vespertilionidae	Pipistrellus	Pipistrellus abramus	AB061528.1	16976	4A:86, 5A:36, 6A:7, 7A:2, 8A:3	4T:75, 5T:19, 6T:4, 7T:3, 8T:1	4C:51, 5C:18, 6C:5	4G:12, 5G:2, 7G:1
Chordata	Mammalia	Sirenia	Dugongidae	Dugong	Dugong dugon	AJ421723.1	16850	4A:60, 5A:26, 6A:5, 7A:1	4T:40, 5T:6, 6T:1, 7T:1	4C:65, 5C:24, 6C:7	4G:19, 5G:5
Chordata	Mammalia	Monotremata	Tachyglossidae	Tachyglossus	Tachyglossus aculeatus	AJ303116.1	16360	4A:67, 5A:29, 6A:6, 7A:2	4T:70, 5T:25, 6T:13, 7T:3, 8T:2, 11T:1	4C:60, 5C:21, 6C:7, 7C:1, 12C:1	4G:18, 5G:5, 6G:1
Chordata	Mammalia	Diprotodontia	Vombatidae	Vombatus	Vombatus ursinus	AJ304826.1	16996	4A:80, 5A:36, 6A:7, 7A:5, 8A:1, 9A:1	4T:45, 5T:7, 6T:1, 7T:1	4C:49, 5C:25, 6C:3, 10C:1	4G:8, 5G:4
Arthropoda	Diplopoda	Spirostreptida	Harpagophoridae	Thyropygus	Thyropygus sp.	NC_003344.1	15133	4A:123, 5A:45, 6A:26, 7A:8, 8A:3, 9A:1	4T:101, 5T:33, 6T:8, 7T:3, 8T:2, 10T:1	4C:43, 5C:15, 6C:1, 7C:2	4G:7, 5G:2
Chordata	Mammalia	Rodentia	Muridae	Rattus	Rattus norvegicus	AJ428514.1	16310	4A:99, 5A:37, 6A:12, 7A:7, 8A:1	4T:43, 5T:9, 6T:3	4C:42, 5C:22, 6C:2, 7C:3	4G:3, 5G:3
Arthropoda	Hexanauplia	Harpacticoida	Harpacticidae	Tigriopus	Tigriopus japonicus	AB060648.1	14628	4A:62, 5A:26, 6A:9, 7A:5, 8A:2	4T:155, 5T:52, 6T:23, 7T:18, 8T:6, 9T:3	4C:10, 5C:5	4G:78, 5G:27, 6G:10, 7G:5, 8G:3, 9G:2
Chordata	Mammalia	Primates	Lemuridae	Lemur	Lemur catta	AJ421451.1	17036	4A:85, 5A:29, 6A:9, 7A:5, 8A:1	4T:57, 5T:12, 6T:4	4C:49, 5C:11, 6C:4	4G:5, 5G:3
Chordata	Mammalia	Macroscelidea	Macroscelididae	Macroscelides	Macroscelides proboscideus	AJ421452.1	16641	4A:85, 5A:27, 6A:8, 7A:3	4T:51, 5T:8, 6T:3, 7T:1	4C:43, 5C:8, 6C:4	4G:8, 5G:2
Chordata	Mammalia	Pilosa	Myrmecophagidae	Tamandua	Tamandua tetradactyla	AJ421450.1	16395	4A:87, 5A:39, 6A:5, 7A:3, 8A:1	4T:40, 5T:15, 6T:2, 7T:2	4C:39, 5C:4, 6C:2, 7C:1	4G:12, 5G:1, 6G:1, 9G:1
Chordata	Mammalia	Scandentia	Tupaiidae	Tupaia	Tupaia belangeri	AJ421453.1	16745	4A:65, 5A:32, 6A:10, 7A:5, 8A:1	4T:37, 5T:15, 7T:1, 9T:1, 10T:1	4C:47, 5C:20, 7C:2	4G:13, 5G:4
Chordata	Amphibia	Caudata	Hynobiidae	Ranodon	Ranodon sibiricus	NC_004021.1	16418	4A:105, 5A:41, 6A:16, 7A:9, 8A:2	4T:120, 5T:42, 6T:11, 7T:13, 8T:2, 9T:2, 11T:1	4C:32, 5C:10, 6C:7	4G:10, 5G:6, 6G:1, 7G:1
Chordata	Aves	Charadriiformes	Scolopacidae	Arenaria	Arenaria interpres	NC_003712.2	16725	4A:82, 5A:25, 6A:5, 7A:1	4T:37, 5T:9, 6T:4, 8T:1	4C:63, 5C:27, 6C:9, 8C:2, 17C:1	4G:12, 5G:2
Arthropoda	Malacostraca	Decapoda	Palinuridae	Panulirus	Panulirus japonicus	AB071201.1	15717	4A:90, 5A:27, 6A:8, 7A:6, 8A:3, 9A:1, 10A:1	4T:108, 5T:44, 6T:15, 7T:3, 8T:1, 9T:1	4C:26, 5C:12, 6C:4, 7C:1, 9C:1	4G:10, 5G:2, 7G:1
Chordata	Actinopteri	Percopsiformes	Aphredoderidae	Aphredoderus	Aphredoderus sayanus	AP004403.1	16601	4A:82, 5A:38, 6A:6	4T:49, 5T:11, 11T:1	4C:83, 5C:42, 6C:7	4G:18, 5G:6, 6G:2
Chordata	Actinopteri	Ophidiiformes	Carapidae	Carapus	Carapus bermudensis	AP004404.1	16613	4A:46, 5A:4	4T:40, 5T:13, 6T:1, 7T:1, 8T:2	4C:82, 5C:44, 6C:8, 7C:3, 9C:1, 10C:1	4G:40, 5G:14, 6G:3, 12G:1
Chordata	Actinopteri	Ophidiiformes	Ophidiidae	Bassozetus	Bassozetus zenkevitchi	AP004405.1	16579	4A:49, 5A:14, 6A:3	4T:34, 5T:9, 6T:3, 7T:2	4C:81, 5C:32, 6C:14, 7C:3	4G:31, 5G:10, 6G:1
Chordata	Actinopteri	Ophidiiformes	Ophidiidae	Sirembo	Sirembo imberbis	AP004406.1	16090	4A:50, 5A:24, 6A:7, 7A:1, 8A:1	4T:32, 5T:17, 6T:2	4C:61, 5C:36, 6C:13, 7C:2, 8C:1	4G:29, 5G:10, 6G:1
Chordata	Actinopteri	Ophidiiformes	Bythitidae	Cataetyx	Cataetyx rubrirostris	AP004407.1	16495	4A:60, 5A:28, 6A:3, 7A:1	4T:46, 5T:16, 6T:2, 9T:1	4C:106, 5C:56, 6C:14	4G:25, 5G:8
Chordata	Actinopteri	Ophidiiformes	Bythitidae	Diplacanthopoma	Diplacanthopoma brachysoma	AP004408.1	16495	4A:70, 5A:23, 6A:7, 7A:1	4T:39, 5T:19, 6T:1, 9T:1	4C:108, 5C:71, 6C:13	4G:24, 5G:7, 6G:3
Chordata	Actinopteri	Gadiformes	Moridae	Physiculus	Physiculus japonicus	AP004409.1	16999	4A:67, 5A:42, 6A:8, 7A:1	4T:93, 5T:33, 6T:11, 7T:3, 8T:3	4C:68, 5C:23, 6C:10, 7C:1, 12C:1	4G:16, 5G:7, 6G:1
Chordata	Actinopteri	Ophidiiformes	Ophidiidae	Lamprogrammus	Lamprogrammus niger	AP004410.1	16564	4A:66, 5A:18, 6A:4	4T:50, 5T:6, 6T:3, 7T:2, 12T:1	4C:71, 5C:36, 6C:10	4G:27, 5G:15, 6G:4
Chordata	Actinopteri	Gadiformes	Bregmacerotidae	Bregmaceros	Bregmaceros nectabanus	AP004411.1	16030	4A:64, 5A:26, 6A:5, 7A:1, 10A:1	4T:81, 5T:23, 6T:5	4C:58, 5C:24, 6C:1	4G:21, 5G:7
Chordata	Actinopteri	Gadiformes	Lotidae	Lota	Lota lota	AP004412.1	16527	4A:66, 5A:27, 6A:8, 7A:1	4T:79, 5T:17, 6T:5, 12T:1	4C:88, 5C:43, 6C:8, 7C:1, 13C:1	4G:24, 5G:7, 6G:1
Chordata	Actinopteri	Lophiiformes	Lophiidae	Lophiomus	Lophiomus setigerus	AP004413.1	15879	4A:48, 5A:26, 6A:6, 7A:1, 8A:1	4T:55, 5T:22, 8T:2	4C:76, 5C:61, 6C:16, 7C:9, 8C:2, 9C:1	4G:30, 5G:15, 6G:4
Chordata	Actinopteri	Lophiiformes	Lophiidae	Lophius	Lophius americanus	AP004414.1	16479	4A:55, 5A:26, 6A:10, 7A:1	4T:45, 5T:13, 6T:2, 12T:1	4C:89, 5C:51, 6C:22, 7C:2, 8C:4	4G:26, 5G:8, 6G:2, 7G:2
Chordata	Actinopteri	Atheriniformes	Melanotaeniidae	Melanotaenia	Melanotaenia lacustris	AP004419.1	16487	4A:70, 5A:25, 6A:7, 7A:1	4T:43, 5T:16, 6T:5, 7T:1	4C:82, 5C:49, 6C:15, 7C:1	4G:13, 5G:7, 6G:2
Chordata	Actinopteri	Atheriniformes	Atherinidae	Hypoatherina	Hypoatherina tsurugae	AP004420.1	16566	4A:52, 5A:32, 6A:5, 7A:2	4T:56, 5T:18, 6T:2, 7T:1, 10T:1	4C:78, 5C:42, 6C:9, 7C:2	4G:23, 5G:9, 6G:1
Chordata	Actinopteri	Cyprinodontiformes	Poeciliidae	Gambusia	Gambusia affinis	AP004422.1	16614	4A:78, 5A:25, 6A:9, 7A:4	4T:62, 5T:30, 6T:6, 7T:1	4C:82, 5C:41, 6C:15, 7C:1, 8C:1	4G:18, 5G:12, 6G:3
Chordata	Actinopteri	Trachichthyiformes	Anoplogasteridae	Anoplogaster	Anoplogaster cornuta	AP004425.1	16511	4A:63, 5A:28, 6A:6, 7A:1	4T:39, 5T:10, 6T:2, 7T:2, 8T:1	4C:91, 5C:45, 6C:15, 7C:1	4G:22, 5G:11, 6G:2
Chordata	Actinopteri	Trachichthyiformes	Diretmidae	Diretmoides	Diretmoides veriginae	AP004426.1	16120	4A:49, 5A:14, 6A:7	4T:21, 5T:7, 6T:1	4C:96, 5C:77, 6C:11, 9C:1, 10C:2	4G:17, 5G:8
Chordata	Actinopteri	Trachichthyiformes	Diretmidae	Diretmus	Diretmus argenteus	AP004427.1	16070	4A:53, 5A:25, 6A:11, 7A:3	4T:40, 5T:9, 6T:2	4C:94, 5C:72, 6C:7, 9C:1, 10C:1	4G:27, 5G:4
Chordata	Actinopteri	Trachichthyiformes	Anomalopidae	Anomalops	Anomalops katoptron	AP004428.1	15980	4A:69, 5A:29, 6A:6, 7A:1	4T:40, 5T:7, 6T:1	4C:81, 5C:46, 6C:9, 10C:1	4G:19, 5G:6
Chordata	Actinopteri	Beryciformes	Berycidae	Beryx	Beryx decadactylus	AP004430.1	16535	4A:67, 5A:19, 6A:9	4T:36, 5T:6, 6T:1, 8T:1	4C:90, 5C:59, 6C:18	4G:20, 5G:10, 6G:4
Chordata	Actinopteri	Holocentriformes	Holocentridae	Ostichthys	Ostichthys japonicus	AP004431.1	16541	4A:65, 5A:29, 6A:3, 7A:2	4T:38, 5T:9, 6T:5	4C:92, 5C:47, 6C:19, 7C:1	4G:25, 5G:12, 6G:1
Chordata	Actinopteri	Holocentriformes	Holocentridae	Sargocentron	Sargocentron rubrum	AP004432.1	16526	4A:64, 5A:29, 6A:5, 7A:4	4T:39, 5T:10, 10T:1	4C:80, 5C:43, 6C:12	4G:14, 5G:8
Chordata	Actinopteri	Zeiformes	Parazenidae	Parazen	Parazen pacificus	AP004433.1	16848	4A:94, 5A:34, 6A:11, 7A:1	4T:52, 5T:13, 6T:7, 7T:1, 8T:1, 10T:1	4C:72, 5C:43, 6C:7, 7C:7, 8C:3, 9C:1	4G:23, 5G:11, 7G:3, 8G:1
Chordata	Actinopteri	Zeiformes	Zenionidae	Zenion	Zenion japonicum	AP004434.1	16843	4A:69, 5A:38, 6A:6, 7A:1	4T:69, 5T:27, 6T:7, 7T:2, 8T:2, 9T:1	4C:94, 5C:51, 6C:20, 7C:6, 8C:1	4G:23, 5G:8, 6G:2
Chordata	Actinopteri	Zeiformes	Oreosomatidae	Allocyttus	Allocyttus niger	AP004435.1	16750	4A:86, 5A:33, 6A:5, 7A:2	4T:69, 5T:24, 6T:8, 10T:1	4C:94, 5C:49, 6C:14, 7C:3	4G:26, 5G:12, 6G:3
Chordata	Actinopteri	Zeiformes	Oreosomatidae	Neocyttus	Neocyttus rhomboidalis	AP004436.1	16745	4A:85, 5A:30, 6A:5, 7A:1	4T:72, 5T:25, 6T:7, 10T:1	4C:89, 5C:52, 6C:17, 7C:3	4G:28, 5G:7, 6G:6
Chordata	Actinopteri	Perciformes	Hypoptychidae	Hypoptychus	Hypoptychus dybowskii	AP004437.1	16479	4A:43, 5A:13, 6A:2	4T:63, 5T:20, 6T:7, 7T:1, 8T:1	4C:95, 5C:39, 6C:14, 7C:1	4G:19, 5G:18, 6G:3
Chordata	Actinopteri	Synbranchiformes	Indostomidae	Indostomus	Indostomus paradoxus	AP004438.1	16152	4A:56, 5A:26, 6A:9, 7A:2	4T:39, 5T:13, 6T:2, 7T:1	4C:101, 5C:47, 6C:15, 7C:4, 8C:1	4G:16, 5G:8, 6G:3
Chordata	Actinopteri	Synbranchiformes	Synbranchidae	Synbranchus	Synbranchus marmoratus	AP004439.1	15561	4A:73, 5A:35, 6A:8, 7A:3	4T:53, 5T:7, 6T:5, 10T:1	4C:51, 5C:34, 6C:7, 7C:2, 9C:1	4G:11, 5G:8, 6G:1
Chordata	Actinopteri	Perciformes	Cottidae	Cottus	Cottus reinii	AP004442.1	16561	4A:58, 5A:19, 6A:3	4T:48, 5T:13, 6T:2, 11T:1	4C:92, 5C:52, 6C:10, 9C:1, 14C:1	4G:31, 5G:13
Chordata	Actinopteri	Perciformes	Cyclopteridae	Aptocyclus	Aptocyclus ventricosus	AP004443.1	15974	4A:69, 5A:30, 6A:7, 7A:1, 8A:1	4T:59, 5T:18, 6T:6, 7T:3, 8T:1	4C:83, 5C:58, 6C:16	4G:14, 5G:9
Chordata	Actinopteri	Carangiformes	Carangidae	Caranx	Caranx melampygus	AP004445.1	16593	4A:77, 5A:16, 6A:5, 7A:1	4T:50, 5T:14, 6T:3	4C:74, 5C:33, 6C:7, 7C:1	4G:15, 5G:10
Chordata	Actinopteri	Perciformes	Pholidae	Pholis	Pholis crassispina	AP004449.1	16522	4A:51, 5A:14, 6A:1	4T:61, 5T:20, 6T:5, 7T:3, 12T:1	4C:82, 5C:45, 6C:8, 12C:1	4G:26, 5G:17, 6G:2
Chordata	Actinopteri	Blenniiformes	Blenniidae	Petroscirtes	Petroscirtes breviceps	AP004450.1	16680	4A:79, 5A:16, 6A:9, 7A:5	4T:96, 5T:25, 6T:10, 7T:9, 8T:2, 9T:1	4C:66, 5C:29, 6C:6, 7C:2, 9C:1	4G:20, 5G:8, 6G:3
Chordata	Actinopteri	Blenniiformes	Blenniidae	Salarias	Salarias fasciatus	AP004451.1	16496	4A:62, 5A:23, 6A:4, 7A:3	4T:43, 5T:22, 6T:5, 7T:2	4C:75, 5C:54, 6C:13, 7C:4	4G:25, 5G:11, 6G:2
Chordata	Actinopteri	Blenniiformes	Gobiesocidae	Aspasma	Aspasma minima	AP004453.1	17487	4A:92, 5A:29, 6A:9, 7A:4, 8A:1	4T:123, 5T:44, 6T:19, 7T:4, 8T:1, 10T:2, 11T:1	4C:63, 5C:26, 6C:2, 10C:1	4G:14, 5G:7, 6G:1, 8G:1, 9G:1, 12G:1, 13G:1
Chordata	Actinopteri	Gobiiformes	Rhyacichthyidae	Rhyacichthys	Rhyacichthys aspro	AP004454.1	16518	4A:70, 5A:21, 6A:5, 7A:1	4T:44, 5T:7, 9T:1	4C:87, 5C:51, 6C:19, 10C:1	4G:26, 5G:10, 6G:1
Chordata	Cladistia	Polypteriformes	Polypteridae	Erpetoichthys	Erpetoichthys calabaricus	AP004350.1	16133	4A:78, 5A:31, 6A:10, 7A:2, 8A:1	4T:76, 5T:17, 6T:8	4C:47, 5C:10, 6C:2	4G:10, 5G:5
Chordata	Actinopteri	Acipenseriformes	Polyodontidae	Polyodon	Polyodon spathula	AP004353.1	16512	4A:84, 5A:33, 6A:8, 7A:1, 8A:1	4T:38, 5T:7, 6T:2, 7T:1	4C:76, 5C:35, 6C:12	4G:22, 5G:5
Chordata	Actinopteri	Acipenseriformes	Acipenseridae	Scaphirhynchus	Scaphirhynchus cf. albus	AP004354.1	16493	4A:77, 5A:30, 6A:5, 7A:1, 8A:1	4T:42, 5T:10, 6T:3	4C:73, 5C:31, 6C:12, 7C:1	4G:21, 5G:6, 6G:1
Chordata	Actinopteri	Semionotiformes	Lepisosteidae	Atractosteus	Atractosteus spatula	AP004355.1	16262	4A:68, 5A:32, 6A:5, 7A:2	4T:43, 5T:10, 6T:5	4C:63, 5C:31, 6C:9, 18C:1	4G:14, 5G:3
Chordata	Actinopteri	Lophiiformes	Caulophrynidae	Caulophryne	Caulophryne jordani	NC_004383.1	16657	4A:41, 5A:13, 6A:1, 7A:1	4T:47, 5T:17, 6T:5	4C:105, 5C:57, 6C:21, 7C:5, 8C:2	4G:32, 5G:14, 7G:1
Chordata	Aves	Sphenisciformes	Spheniscidae	Eudyptula	Eudyptula minor	NC_004538.1	17611	4A:86, 5A:25, 6A:4, 7A:2	4T:32, 5T:7, 6T:1, 8T:1	4C:80, 5C:39, 6C:5, 7C:5, 8C:1	4G:10, 5G:4
Chordata	Actinopteri	Argentiniformes	Bathylagidae	Lipolagus	Lipolagus ochotensis	AP004101.1	17338	4A:68, 5A:22, 6A:6, 7A:1	4T:43, 5T:17, 6T:4, 7T:1, 9T:1	4C:101, 5C:41, 6C:8, 11C:1	4G:25, 5G:16, 17G:1
Chordata	Actinopteri	Esociformes	Umbridae	Dallia	Dallia pectoralis	AP004102.1	17157	4A:94, 5A:36, 6A:6, 7A:3	4T:105, 5T:33, 6T:8, 7T:8, 8T:2	4C:86, 5C:44, 6C:9, 7C:2	4G:17, 5G:12, 6G:3
Chordata	Actinopteri	Galaxiiformes	Galaxiidae	Galaxias	Galaxias maculatus	AP004104.1	16508	4A:31, 5A:11, 6A:2	4T:81, 5T:23, 6T:9, 7T:5, 8T:3	4C:76, 5C:34, 6C:11, 7C:2	4G:45, 5G:18, 6G:4, 7G:2
Chordata	Actinopteri	Argentiniformes	Argentinidae	Glossanodon	Glossanodon semifasciatus	AP004105.1	16627	4A:69, 5A:28, 6A:10, 7A:3	4T:55, 5T:28, 6T:11, 7T:5, 9T:1, 13T:1	4C:91, 5C:48, 6C:14, 7C:1, 8C:2, 9C:1, 11C:1	4G:25, 5G:9, 6G:1
Chordata	Actinopteri	Alepocephaliformes	Platytroctidae	Platytroctes	Platytroctes apus	AP004107.1	16632	4A:60, 5A:14, 6A:6	4T:31, 5T:4, 7T:1	4C:94, 5C:61, 6C:14, 7C:4	4G:39, 5G:13, 6G:1, 7G:1
Chordata	Actinopteri	Osmeriformes	Retropinnidae	Retropinna	Retropinna retropinna	AP004108.1	16563	4A:33, 5A:13, 6A:1	4T:47, 5T:16, 6T:5, 9T:2	4C:72, 5C:37, 6C:9, 7C:3, 8C:1, 11C:1	4G:45, 5G:22, 6G:2
Chordata	Actinopteri	Osmeriformes	Salangidae	Salangichthys	Salangichthys microdon	AP004109.1	16598	4A:34, 5A:14, 6A:2	4T:45, 5T:14, 6T:4, 9T:1, 10T:1	4C:106, 5C:49, 6C:14	4G:40, 5G:17, 6G:7
Chordata	Actinopteri	Argentiniformes	Opisthoproctidae	Opisthoproctus	Opisthoproctus soleatus	AP004110.1	16645	4A:66, 5A:23, 6A:4, 7A:3	4T:72, 5T:21, 6T:4, 7T:1, 8T:1, 10T:1	4C:102, 5C:53, 6C:13, 7C:4, 8C:2, 9C:3, 10C:1	4G:33, 5G:14, 6G:1, 8G:1
Echinodermata	Asteroidea	Forcipulatida	Asteriidae	Pisaster	Pisaster ochraceus	X55514.2	14837	4A:99, 5A:36, 6A:20, 7A:8, 8A:1, 9A:1, 10A:1	4T:107, 5T:36, 6T:20, 7T:12, 8T:6, 9T:1	4C:29, 5C:9, 8C:1	4G:8, 5G:1
Chordata	Actinopteri	Characiformes	Alestidae	Phenacogrammus	Phenacogrammus interruptus	AB054129.1	16652	4A:77, 5A:35, 6A:11, 7A:2, 8A:2	4T:41, 5T:16, 6T:10, 7T:5, 8T:1	4C:77, 5C:45, 6C:17, 7C:4, 8C:1, 9C:1	4G:22, 5G:13, 6G:2, 7G:1
Chordata	Actinopteri	Characiformes	Chalceidae	Chalceus	Chalceus macrolepidotus	AB054130.1	16850	4A:83, 5A:28, 6A:6, 7A:3	4T:54, 5T:10, 6T:4	4C:83, 5C:27, 6C:12	4G:14, 5G:7
Chordata	Actinopteri	Gymnotiformes	Sternopygidae	Eigenmannia	Eigenmannia sp.	AB054131.1	16571	4A:74, 5A:23, 6A:7, 7A:2	4T:43, 5T:8, 6T:1, 7T:1	4C:85, 5C:61, 6C:14	4G:24, 5G:7, 6G:1
Chordata	Actinopteri	Gymnotiformes	Apteronotidae	Apteronotus	Apteronotus albifrons	AB054132.1	15897	4A:76, 5A:26, 6A:7, 7A:2, 8A:1	4T:48, 5T:9, 6T:4, 7T:1	4C:79, 5C:32, 6C:10	4G:11, 5G:5, 6G:1, 7G:1
Chordata	Actinopteri	Gonorynchiformes	Chanidae	Chanos	Chanos chanos	AB054133.1	16231	4A:54, 5A:24, 6A:4	4T:32, 5T:13	4C:69, 5C:31, 6C:6	4G:31, 5G:2, 6G:1
Chordata	Mammalia	Artiodactyla	Physeteridae	Physeter	Physeter macrocephalus	AJ277029.2	16428	4A:71, 5A:30, 6A:9, 7A:4, 8A:2	4T:27, 5T:16, 6T:1, 10T:1	4C:75, 5C:29, 6C:5, 7C:3, 10C:1, 20C:1	4G:9, 5G:2, 6G:1, 8G:1
Chordata	Amphibia	Caudata	Cryptobranchidae	Andrias	Andrias davidianus	AJ492192.1	16503	4A:92, 5A:35, 6A:11, 7A:9, 8A:2, 9A:1	4T:119, 5T:33, 6T:13, 7T:6, 8T:1, 11T:1	4C:41, 5C:12, 6C:4	4G:18, 5G:2
Chordata	Mammalia	Primates	Aotidae	Aotus	Aotus trivirgatus	AY250707.1	12771	4A:58, 5A:27, 6A:5, 7A:3	4T:48, 5T:9, 6T:3	4C:40, 5C:19, 6C:1	4G:3, 5G:4
Chordata	Mammalia	Carnivora	Odobenidae	Odobenus	Odobenus rosmarus	AJ428576.2	16565	4A:64, 5A:31, 6A:10, 7A:2, 8A:1	4T:34, 5T:12, 6T:2, 7T:2	4C:42, 5C:11, 6C:3, 7C:1	4G:8, 5G:3, 6G:1, 8G:1
Chordata	Mammalia	Eulipotyphla	Erinaceidae	Hemiechinus	Hemiechinus auritus	AB099481.1	17283	4A:100, 5A:33, 6A:13, 7A:4	4T:101, 5T:31, 6T:16, 7T:2, 12T:1	4C:31, 5C:8, 6C:3, 7C:1	4G:4, 5G:1
Chordata	Mammalia	Eulipotyphla	Talpidae	Mogera	Mogera wogura	AB099482.1	16814	4A:86, 5A:41, 6A:9, 7A:2, 9A:1	4T:68, 5T:11, 6T:7, 8T:1	4C:32, 5C:10, 6C:2	4G:11, 5G:2
Chordata	Mammalia	Eulipotyphla	Talpidae	Urotrichus	Urotrichus talpoides	AB099483.1	16904	4A:82, 5A:41, 6A:6, 7A:3, 8A:2, 9A:1, 10A:2, 12A:1	4T:72, 5T:16, 6T:1, 7T:3	4C:46, 5C:13, 6C:3	4G:13, 5G:3
Arthropoda	Malacostraca	Decapoda	Portunidae	Portunus	Portunus trituberculatus	AB093006.1	16026	4A:94, 5A:33, 6A:10, 7A:6, 8A:2, 9A:2	4T:128, 5T:58, 6T:17, 7T:5, 8T:4, 9T:1	4C:16, 5C:3, 6C:1	4G:4, 5G:1
Nematoda	Chromadorea	Rhabditida	Ancylostomatidae	Necator	Necator americanus	AJ556134.1	13606	4A:58, 5A:10, 6A:8, 7A:5, 8A:1, 9A:1	4T:233, 5T:106, 6T:65, 7T:35, 8T:14, 9T:7, 10T:3, 12T:1	4C:1	4G:9, 5G:6, 6G:1
Chordata	Mammalia	Hyracoidea	Procaviidae	Procavia	Procavia capensis	AJ428945.1	16472	4A:79, 5A:44, 6A:10, 7A:3, 8A:1, 9A:1	4T:31, 5T:6, 7T:1	4C:49, 5C:20, 6C:4, 8C:2, 9C:1	4G:17, 5G:5, 6G:1
Chordata	Mammalia	Proboscidea	Elephantidae	Elephas	Elephas maximus	AJ428946.1	16831	4A:73, 5A:38, 6A:12, 7A:1, 9A:1	4T:52, 5T:5, 6T:5, 7T:1	4C:43, 5C:13, 6C:2	4G:12, 5G:2, 6G:1
Chordata	Mammalia	Perissodactyla	Tapiridae	Tapirus	Tapirus terrestris	AJ428947.1	16776	4A:88, 5A:42, 6A:8, 7A:4, 8A:1, 10A:1	4T:40, 5T:10, 6T:3, 7T:1, 9T:1	4C:43, 5C:8, 6C:2, 7C:1, 8C:1	4G:4, 5G:1
Chordata	Actinopteri	Anguilliformes	Congridae	Conger	Conger myriaster	AB038381.2	18705	4A:126, 5A:47, 6A:15, 7A:2, 8A:1	4T:101, 5T:26, 6T:10, 7T:2, 8T:2, 13T:1	4C:46, 5C:12, 6C:5, 8C:1	4G:22, 5G:9, 6G:2, 10G:1
Chordata	Actinopteri	Spariformes	Sparidae	Pagrus	Pagrus auriga	AB124801.1	16628	4A:61, 5A:28, 6A:5, 7A:2	4T:49, 5T:23, 6T:4, 8T:1, 10T:1	4C:72, 5C:36, 6C:13, 7C:3, 8C:1, 9C:2	4G:19, 5G:7, 6G:1
Arthropoda	Insecta	Hemiptera	Aphalaridae	Pachypsylla	Pachypsylla venusta	AY278317.1	14711	4A:157, 5A:48, 6A:30, 7A:10, 8A:4, 9A:1	4T:120, 5T:42, 6T:12, 7T:10, 8T:1, 9T:3	4C:17, 5C:6, 6C:2, 7C:2	4G:1
Chordata	Mammalia	Carnivora	Felidae	Acinonyx	Acinonyx jubatus	NC_005212.1	17047	4A:76, 5A:39, 6A:9, 7A:5, 8A:3, 10A:1	4T:40, 5T:11, 6T:3	4C:52, 5C:15, 6C:4	4G:9, 5G:3
Chordata	Actinopteri	Anguilliformes	Saccopharyngidae	Saccopharynx	Saccopharynx lavenbergi	AB047825.1	18495	4A:83, 5A:32, 6A:6, 7A:2	4T:77, 5T:18, 6T:5, 7T:2, 8T:2	4C:64, 5C:32, 6C:15, 7C:9, 8C:1, 9C:2	4G:34, 5G:12, 6G:5, 9G:1
Chordata	Actinopteri	Anguilliformes	Eurypharyngidae	Eurypharynx	Eurypharynx pelecanoides	AB046473.2	18978	4A:104, 5A:42, 6A:15, 7A:2, 8A:1	4T:68, 5T:17, 6T:9, 9T:1	4C:76, 5C:40, 6C:7, 7C:6, 8C:2	4G:12, 5G:8, 6G:3, 7G:2
Chordata	Mammalia	Artiodactyla	Balaenidae	Balaena	Balaena mysticetus	AJ554051.1	16390	4A:86, 5A:35, 6A:7, 7A:4, 8A:1	4T:39, 5T:9, 6T:3	4C:64, 5C:23, 6C:6	4G:8, 5G:2, 8G:1
Chordata	Mammalia	Artiodactyla	Neobalaenidae	Caperea	Caperea marginata	AJ554052.1	16383	4A:72, 5A:38, 6A:8, 7A:4, 8A:1	4T:43, 5T:8, 6T:4	4C:62, 5C:18, 6C:2, 7C:1	4G:6, 5G:3, 8G:1
Chordata	Mammalia	Artiodactyla	Eschrichtiidae	Eschrichtius	Eschrichtius robustus	AJ554053.1	16412	4A:81, 5A:37, 6A:6, 7A:4	4T:29, 5T:9, 6T:1, 8T:1	4C:72, 5C:23, 6C:5, 7C:1	4G:3, 5G:1, 6G:1
Chordata	Mammalia	Artiodactyla	Physeteridae	Kogia	Kogia breviceps	AJ554055.1	16406	4A:76, 5A:33, 6A:6, 7A:6, 8A:3	4T:32, 5T:6, 6T:3, 7T:1, 8T:1, 9T:1	4C:75, 5C:27, 6C:7, 7C:2, 8C:1	4G:18, 5G:10, 10G:1
Chordata	Mammalia	Artiodactyla	Ziphiidae	Hyperoodon	Hyperoodon ampullatus	AJ554056.1	16346	4A:78, 5A:38, 6A:10, 7A:5, 8A:1	4T:37, 5T:14, 6T:3, 7T:1, 8T:1	4C:50, 5C:17, 6C:7	4G:7, 5G:2, 7G:1
Chordata	Mammalia	Artiodactyla	Ziphiidae	Berardius	Berardius bairdii	AJ554057.1	16346	4A:84, 5A:33, 6A:9, 7A:2, 8A:3	4T:37, 5T:14, 6T:1, 7T:1	4C:50, 5C:21, 6C:6, 7C:1	4G:9, 5G:3, 6G:1, 8G:1
Chordata	Mammalia	Artiodactyla	Platanistidae	Platanista	Platanista minor	AJ554058.1	16324	4A:77, 5A:34, 6A:8, 7A:5, 8A:3	4T:54, 5T:16	4C:66, 5C:18, 6C:5, 9C:1	4G:7, 5G:3
Chordata	Mammalia	Artiodactyla	Iniidae	Inia	Inia geoffrensis	AJ554059.1	16588	4A:81, 5A:40, 6A:12, 7A:6, 8A:1	4T:41, 5T:11, 6T:2	4C:66, 5C:26, 6C:7, 7C:2, 9C:1	4G:8, 5G:7, 9G:1
Chordata	Mammalia	Artiodactyla	Pontoporiidae	Pontoporia	Pontoporia blainvillei	AJ554060.1	16593	4A:76, 5A:40, 6A:15, 7A:5	4T:36, 5T:15, 6T:2	4C:74, 5C:17, 6C:4, 7C:2	4G:10, 5G:2, 6G:1, 7G:1
Chordata	Mammalia	Artiodactyla	Delphinidae	Lagenorhynchus	Lagenorhynchus albirostris	AJ554061.1	16393	4A:65, 5A:41, 6A:13, 7A:3, 8A:2	4T:55, 5T:13, 6T:5, 7T:2	4C:48, 5C:15, 6C:3	4G:4, 5G:1, 7G:1
Chordata	Mammalia	Artiodactyla	Monodontidae	Monodon	Monodon monoceros	AJ554062.1	16383	4A:69, 5A:41, 6A:11, 7A:4, 8A:2	4T:41, 5T:10, 6T:3, 7T:1	4C:51, 5C:17, 6C:7	4G:6, 5G:3, 6G:1, 9G:1
Chordata	Mammalia	Artiodactyla	Phocoenidae	Phocoena	Phocoena phocoena	AJ554063.1	16382	4A:71, 5A:39, 6A:10, 7A:6, 8A:2	4T:57, 5T:8, 6T:3, 7T:1	4C:60, 5C:25, 6C:4, 7C:1	4G:11, 5G:6, 7G:1, 9G:1
Nematoda	Chromadorea	Rhabditida	Onchocercidae	Dirofilaria	Dirofilaria immitis	AJ537512.1	13814	4A:27, 5A:11, 6A:4, 9A:1	4T:234, 5T:132, 6T:88, 7T:62, 8T:41, 9T:26, 10T:16, 11T:6, 12T:2, 13T:3, 14T:5, 15T:2, 17T:1, 18T:2, 20T:1	4C:1	4G:20, 5G:7, 6G:3, 7G:1, 8G:1
Chordata	Aves	Passeriformes	Acanthisittidae	Acanthisitta	Acanthisitta chloris	AY325307.1	16069	4A:76, 5A:25, 6A:6, 7A:4	4T:22, 5T:6, 6T:2	4C:83, 5C:47, 6C:11, 7C:5, 8C:1, 9C:1, 11C:1	4G:7, 5G:5
Chordata	Mammalia	Rodentia	Dipodidae	Jaculus	Jaculus jaculus	AJ416890.1	16546	4A:72, 5A:32, 6A:6, 7A:2, 8A:1	4T:60, 5T:19, 6T:6	4C:58, 5C:18, 6C:9, 17C:1	4G:5, 5G:3, 9G:1
Chordata	Actinopteri	Scombriformes	Scombridae	Katsuwonus	Katsuwonus pelamis	AB101290.1	16515	4A:68, 5A:20, 6A:6, 7A:1	4T:32, 5T:7	4C:82, 5C:41, 6C:4	4G:18, 5G:7
Chordata	Actinopteri	Scombriformes	Scombridae	Auxis	Auxis thazard	AB105447.1	16506	4A:68, 5A:20, 6A:6, 7A:1	4T:34, 5T:5, 6T:1, 7T:1	4C:77, 5C:41, 6C:7	4G:26, 5G:9
Chordata	Mammalia	Rodentia	Spalacidae	Nannospalax	Nannospalax ehrenbergi	NC_005315.1	16408	4A:87, 5A:28, 6A:11, 7A:2, 9A:1	4T:34, 5T:10, 6T:5, 9T:1	4C:45, 5C:13, 6C:3	4G:7, 5G:3, 6G:1
Chordata	Mammalia	Lagomorpha	Ochotonidae	Ochotona	Ochotona princeps	AJ537415.1	16481	4A:64, 5A:29, 6A:9, 7A:1, 10A:1	4T:37, 5T:8, 6T:1	4C:65, 5C:32, 6C:6	4G:10, 5G:2, 6G:1
Chordata	Actinopteri	Cypriniformes	Catostomidae	Carpiodes	Carpiodes carpio	AB126083.1	16610	4A:56, 5A:18, 6A:4, 7A:2	4T:60, 5T:7, 6T:2, 7T:1	4C:65, 5C:25, 6C:10, 7C:1	4G:23, 5G:8, 6G:5
Chordata	Amphibia	Caudata	Ambystomatidae	Ambystoma	Ambystoma mexicanum	AJ584639.1	16369	4A:108, 5A:37, 6A:14, 7A:7, 8A:2	4T:103, 5T:32, 6T:20, 7T:5, 8T:2	4C:28, 5C:15, 6C:1, 7C:1	4G:15, 5G:5, 6G:2, 10G:1
Chordata	Actinopteri	Albuliformes	Albulidae	Albula	Albula glossodonta	AP002973.1	16255	4A:33, 5A:11, 6A:3	4T:88, 5T:20, 6T:7, 7T:2	4C:32, 5C:9, 6C:3	4G:74, 5G:33, 6G:11
Chordata	Actinopteri	Anguilliformes	Ophichthidae	Ophisurus	Ophisurus macrorhynchos	AP002978.1	17843	4A:85, 5A:30, 6A:9, 7A:2	4T:55, 5T:21, 6T:1, 7T:1	4C:61, 5C:41, 6C:8, 12C:1	4G:17, 5G:12
Chordata	Actinopteri	Elopiformes	Elopidae	Elops	Elops saurus	AP004807.1	16120	4A:66, 5A:29, 6A:5, 7A:2	4T:32, 5T:4, 6T:1	4C:70, 5C:25, 6C:5	4G:22, 5G:4, 6G:1
Chordata	Actinopteri	Elopiformes	Megalopidae	Megalops	Megalops atlanticus	AP004808.1	16686	4A:69, 5A:29, 6A:10, 7A:1	4T:38, 5T:7, 6T:2, 7T:1	4C:52, 5C:17, 6C:8, 8C:1	4G:13, 5G:5, 6G:1
Chordata	Actinopteri	Albuliformes	Albulidae	Pterothrissus	Pterothrissus gissu	AB051197.2	16188	4A:64, 5A:30, 6A:6, 7A:2	4T:38, 5T:11, 6T:1	4C:84, 5C:28, 6C:8	4G:22, 5G:8, 6G:2
Chordata	Actinopteri	Anguilliformes	Synaphobranchidae	Synaphobranchus	Synaphobranchus kaupii	AP002977.2	16166	4A:82, 5A:38, 6A:3, 7A:4	4T:37, 5T:15, 6T:4, 7T:2	4C:88, 5C:33, 6C:9, 7C:3, 8C:1	4G:30, 5G:13, 6G:3, 7G:1
Arthropoda	Arachnida	Ixodida	Argasidae	Ornithodoros	Ornithodoros porcinus	AB105451.1	14378	4A:115, 5A:59, 6A:25, 7A:15, 8A:10, 9A:7, 10A:1, 12A:1	4T:122, 5T:38, 6T:16, 7T:8, 8T:4, 10T:1	4C:27, 5C:11, 6C:2, 7C:1	4G:6, 5G:3
Chordata	Actinopteri	Acipenseriformes	Polyodontidae	Psephurus	Psephurus gladius	AY571339.1	16483	4A:86, 5A:29, 6A:5, 7A:1, 8A:1	4T:42, 5T:11, 6T:2	4C:94, 5C:34, 6C:13	4G:19, 5G:5
Chordata	Mammalia	Paucituberculata	Caenolestidae	Caenolestes	Caenolestes fuliginosus	AJ508400.1	16629	4A:89, 5A:34, 6A:8, 7A:5, 8A:1, 9A:1	4T:72, 5T:10, 6T:7, 7T:3, 10T:1	4C:36, 5C:10, 6C:3, 10C:1	4G:5, 5G:3, 13G:1
Chordata	Mammalia	Paucituberculata	Caenolestidae	Rhyncholestes	Rhyncholestes raphanurus	AJ508399.1	16727	4A:93, 5A:38, 6A:8, 7A:3, 9A:1, 10A:1	4T:67, 5T:19, 6T:5, 7T:1, 9T:2, 10T:1, 11T:1	4C:36, 5C:8, 6C:1, 8C:1	4G:10, 5G:1, 7G:1, 14G:1
Chordata	Mammalia	Didelphimorphia	Didelphidae	Thylamys	Thylamys elegans	AJ508401.2	15452	4A:71, 5A:25, 6A:10, 7A:2	4T:60, 5T:17, 6T:3	4C:44, 5C:6, 6C:3, 11C:1	4G:10, 5G:1, 6G:3, 7G:1
Chordata	Mammalia	Microbiotheria	Microbiotheriidae	Dromiciops	Dromiciops gliroides	AJ508402.2	15350	4A:73, 5A:26, 6A:10, 7A:4, 8A:1	4T:55, 5T:10, 6T:4	4C:54, 5C:16, 6C:2	4G:11, 5G:3, 6G:1
Arthropoda	Insecta	Hemiptera	Aleyrodidae	Neomaskellia	Neomaskellia andropogonis	AY572539.1	14496	4A:125, 5A:41, 6A:14, 7A:8, 8A:4, 9A:2, 10A:1, 12A:1, 14A:1	4T:206, 5T:98, 6T:33, 7T:16, 8T:6, 9T:5, 10T:4, 12T:1, 13T:1, 15T:1, 16T:2, 19T:2	4C:2	4G:5, 5G:3
Arthropoda	Insecta	Hemiptera	Aleyrodidae	Aleurochiton	Aleurochiton aceris	AY572538.1	15388	4A:108, 5A:36, 6A:23, 7A:5, 8A:2	4T:205, 5T:105, 6T:36, 7T:8, 8T:8, 9T:2, 10T:3, 21T:1, 23T:1, 29T:1	4C:2	4G:13, 5G:2, 6G:1
Chordata	Actinopteri	Tetraodontiformes	Molidae	Masturus	Masturus lanceolatus	AP006239.1	16481	4A:58, 5A:20, 6A:6	4T:42, 5T:13, 6T:5, 7T:3	4C:92, 5C:41, 6C:14, 7C:1	4G:22, 5G:8, 7G:1
Mollusca	Scaphopoda	Gadilida	Siphonodentaliidae	Siphonodentalium	Siphonodentalium lobatum	NC_005840.1	13932	4A:76, 5A:23, 6A:12, 7A:9, 8A:1, 10A:1, 14A:1	4T:136, 5T:46, 6T:16, 7T:6, 8T:2, 9T:1, 10T:1, 11T:1	4C:12, 5C:5, 6C:2, 8C:1	4G:22, 5G:11, 6G:3
Chordata	Aves	Tinamiformes	Tinamidae	Eudromia	Eudromia elegans	NC_002772.2	18305	4A:69, 5A:25, 6A:13, 7A:11, 8A:2	4T:60, 5T:26, 6T:16, 7T:8, 8T:15	4C:87, 5C:40, 6C:15, 7C:4, 8C:1	4G:6, 5G:2
Arthropoda	Malacostraca	Euphausiacea	Euphausiidae	Euphausia	Euphausia superba	AB084378.1	14606	4A:100, 5A:27, 6A:13, 7A:4, 8A:2	4T:99, 5T:38, 6T:14, 7T:7, 8T:3, 9T:1	4C:23, 5C:4, 6C:1	4G:4, 6G:1
Arthropoda	Chilopoda	Scutigeromorpha	Scutigeridae	Scutigera	Scutigera coleoptrata	AJ507061.2	14922	4A:114, 5A:49, 6A:17, 7A:10, 8A:1	4T:73, 5T:35, 6T:5, 7T:1	4C:26, 5C:10, 6C:3, 7C:1	4G:3, 5G:1
Arthropoda	Thecostraca	Balanomorpha	Tetraclitidae	Tetraclita	Tetraclita japonica	AB126701.1	15194	4A:133, 5A:61, 6A:19, 7A:16, 8A:10, 9A:3	4T:110, 5T:43, 6T:10, 7T:5, 8T:2	4C:36, 5C:15, 6C:2	4G:8, 5G:5
Chordata	Aves	Casuariiformes	Casuariidae	Casuarius	Casuarius casuarius	NC_002778.2	16756	4A:79, 5A:24, 6A:4, 7A:4	4T:32, 5T:9, 8T:1, 9T:1	4C:67, 5C:35, 6C:5, 8C:2, 9C:1	4G:11, 5G:8, 6G:2
Chordata	Aves	Anseriformes	Anseranatidae	Anseranas	Anseranas semipalmata	NC_005933.1	16870	4A:72, 5A:24, 6A:3, 7A:5	4T:29, 5T:4, 6T:2, 7T:1	4C:81, 5C:41, 6C:5, 7C:1, 8C:1	4G:11, 5G:3, 6G:1
Arthropoda	Insecta	Hemiptera	Aphrophoridae	Philaenus	Philaenus spumarius	NC_005944.1	16324	4A:151, 5A:60, 6A:32, 7A:25, 8A:4, 9A:3, 10A:6, 11A:1	4T:105, 5T:52, 6T:17, 7T:4, 8T:6, 9T:3, 10T:1	4C:12, 5C:2, 7C:1	4G:8, 5G:2, 6G:2, 8G:1
Arthropoda	Arachnida	Araneae	Salticidae	Habronattus	Habronattus oregonensis	NC_005942.1	14381	4A:76, 5A:19, 6A:3, 7A:2	4T:142, 5T:66, 6T:31, 7T:12, 8T:8, 9T:1, 10T:1	4C:2, 5C:1	4G:20, 5G:5, 6G:1, 7G:1
Chordata	Lepidosauria	Squamata	Phrynosomatidae	Sceloporus	Sceloporus occidentalis	AB079242.1	17072	4A:76, 5A:47, 6A:8, 7A:3, 9A:2	4T:49, 5T:25, 6T:4, 7T:1	4C:67, 5C:16, 6C:5, 7C:1	4G:16, 5G:3, 6G:4
Chordata	Lepidosauria	Squamata	Leptotyphlopidae	Rena	Rena humilis	AB079597.1	16218	4A:109, 5A:46, 6A:20, 7A:3, 8A:3	4T:18, 5T:13, 6T:3, 7T:1, 8T:1, 11T:1	4C:55, 5C:22, 6C:7, 7C:2, 8C:1, 9C:1	4G:13, 5G:5, 6G:2
Chordata	Lepidosauria	Squamata	Cordylidae	Smaug	Smaug warreni	AB079613.1	17184	4A:92, 5A:36, 6A:4, 7A:5, 8A:1	4T:38, 5T:21, 6T:7, 7T:1	4C:64, 5C:25, 6C:9, 7C:2, 8C:1	4G:12, 5G:5, 6G:1, 7G:1
Chordata	Lepidosauria	Squamata	Anguidae	Abronia	Abronia graminea	AB080273.1	16016	4A:87, 5A:45, 6A:9, 7A:3	4T:44, 5T:21, 6T:2, 7T:1	4C:50, 5C:9, 6C:4	4G:11, 5G:3, 6G:1
Chordata	Lepidosauria	Squamata	Shinisauridae	Shinisaurus	Shinisaurus crocodilurus	AB080274.1	16583	4A:91, 5A:39, 6A:9, 7A:4, 8A:4	4T:75, 5T:23, 6T:6, 7T:3, 8T:2	4C:67, 5C:24, 6C:12, 7C:1, 10C:1	4G:16, 5G:2, 6G:1
Arthropoda	Collembola	Poduromorpha	Poduridae	Podura	Podura aquatica	NC_006075.1	13809	4A:101, 5A:35, 6A:21, 7A:11, 8A:2	4T:83, 5T:33, 6T:13, 7T:5, 8T:3	4C:47, 5C:24, 6C:9, 7C:1	4G:18, 5G:2, 6G:3, 7G:1
Arthropoda	Collembola	Poduromorpha	Onychiuridae	Onychiurus	Onychiurus orientalis	NC_006074.1	12984	4A:88, 5A:27, 6A:13, 7A:9, 8A:6, 9A:1	4T:107, 5T:47, 6T:21, 7T:15, 8T:5, 9T:1	4C:22, 5C:11, 6C:4, 7C:3	4G:10, 5G:4, 6G:1
Chaetognatha	Sagittoidea	Phragmophora	Spadellidae	Paraspadella	Paraspadella gotoi	NC_006083.1	11423	4A:92, 5A:52, 6A:47, 7A:16, 8A:4, 9A:7, 10A:4, 11A:3, 15A:1	4T:83, 5T:29, 6T:22, 7T:13, 8T:4, 9T:3, 10T:6, 11T:2, 13T:1	4C:14, 5C:5	4G:7, 5G:1, 6G:2, 7G:1
Arthropoda	Insecta	Hemiptera	Aphididae	Schizaphis	Schizaphis graminum	NC_006158.1	15721	4A:198, 5A:90, 6A:43, 7A:16, 8A:13, 9A:10, 10A:6, 11A:3, 12A:2, 17A:1, 24A:1, 25A:1	4T:165, 5T:60, 6T:30, 7T:28, 8T:9, 9T:1, 10T:1, 14T:1	4C:3, 7C:1	4G:5
Mollusca	Scaphopoda	Dentaliida	Dentaliidae	Graptacme	Graptacme eborea	NC_006162.1	14492	4A:127, 5A:55, 6A:20, 7A:6, 8A:8, 9A:1, 10A:4, 11A:1	4T:117, 5T:51, 6T:24, 7T:12, 8T:4, 9T:3, 10T:1	4C:10, 5C:4	4G:15, 5G:4
Chordata	Amphibia	Caudata	Plethodontidae	Nototriton	Nototriton abscondens	AY728229.1	17687	4A:103, 5A:41, 6A:16, 7A:8, 11A:1	4T:62, 5T:33, 6T:15, 7T:2, 15T:1	4C:33, 5C:8, 6C:4, 7C:1	4G:10, 5G:2, 6G:2, 7G:2, 16G:1
Arthropoda	Thecostraca	Pollicipedomorpha	Pollicipedidae	Capitulum	Capitulum mitella	AB167462.1	14916	4A:120, 5A:45, 6A:21, 7A:11, 8A:3	4T:82, 5T:46, 6T:10, 7T:3, 8T:2	4C:36, 5C:8, 6C:2, 7C:1	4G:8
Arthropoda	Thecostraca	Balanomorpha	Balanidae	Megabalanus	Megabalanus volcano	AB167539.1	15107	4A:79, 5A:36, 6A:24, 7A:7, 8A:5, 9A:2	4T:140, 5T:51, 6T:26, 7T:7, 8T:5	4C:21, 5C:3	4G:9, 5G:4
Arthropoda	Insecta	Hemiptera	Aleyrodidae	Trialeurodes	Trialeurodes vaporariorum	NC_006280.1	18414	4A:88, 5A:51, 6A:9, 7A:5, 8A:1, 9A:2, 21A:5	4T:249, 5T:95, 6T:40, 7T:17, 8T:7, 9T:5, 10T:4, 19T:3, 20T:1, 21T:2	4C:4, 7C:1	4G:44, 5G:17, 6G:4, 7G:4, 8G:1, 10G:1, 11G:1
Chordata	Lepidosauria	Squamata	Trogonophidae	Diplometopon	Diplometopon zarudnyi	NC_006283.1	16730	4A:89, 5A:37, 6A:4, 7A:4, 8A:1, 9A:1	4T:50, 5T:20, 6T:11, 7T:1	4C:36, 5C:12, 6C:3, 7C:3, 8C:1	4G:9, 5G:3
Chordata	Lepidosauria	Squamata	Rhineuridae	Rhineura	Rhineura floridana	NC_006282.1	16988	4A:87, 5A:29, 6A:3, 7A:2, 8A:2	4T:27, 5T:14, 6T:5, 7T:3, 10T:1	4C:58, 5C:9, 6C:1, 7C:1	4G:17, 5G:5
Arthropoda	Insecta	Hemiptera	Aleyrodidae	Tetraleurodes	Tetraleurodes acaciae	NC_006292.1	15080	4A:121, 5A:42, 6A:10, 7A:4, 8A:2, 9A:1, 10A:1, 12A:1	4T:185, 5T:105, 6T:21, 7T:14, 8T:8, 9T:4, 10T:4, 13T:2, 18T:1, 19T:1	4C:12, 5C:4, 7C:2	4G:24, 5G:12, 6G:4, 7G:1, 9G:1
Chordata	Lepidosauria	Squamata	Amphisbaenidae	Amphisbaena	Amphisbaena schmidti	NC_006284.1	17423	4A:88, 5A:37, 6A:10, 7A:2, 8A:1	4T:39, 5T:30, 6T:13, 7T:1	4C:58, 5C:21, 6C:4, 7C:2	4G:10, 5G:3, 6G:1
Chordata	Lepidosauria	Squamata	Bipedidae	Bipes	Bipes canaliculatus	NC_006288.1	16200	4A:71, 5A:19, 6A:6, 8A:1	4T:23, 5T:12, 7T:2	4C:57, 5C:8, 6C:7, 9C:1	4G:15, 5G:3
Chordata	Mammalia	Didelphimorphia	Didelphidae	Monodelphis	Monodelphis domestica	AJ508398.1	17079	4A:85, 5A:36, 6A:11, 7A:6, 8A:1, 9A:1	4T:85, 5T:25, 6T:7, 7T:1, 9T:2	4C:50, 5C:22, 7C:1	4G:10, 5G:6
Chordata	Amphibia	Gymnophiona	Rhinatrematidae	Rhinatrema	Rhinatrema bivittatum	NC_006303.1	16422	4A:79, 5A:43, 6A:8, 7A:3, 8A:2	4T:60, 5T:16, 6T:9, 7T:3, 8T:2, 9T:2	4C:64, 5C:20, 6C:4, 7C:5, 8C:2	4G:17, 5G:6
Chordata	Amphibia	Gymnophiona	Ichthyophiidae	Ichthyophis	Ichthyophis glutinosus	NC_006302.1	15986	4A:80, 5A:44, 6A:9, 7A:6, 8A:2, 9A:2	4T:58, 5T:23, 6T:4, 7T:3, 8T:1, 11T:1	4C:21, 5C:3, 6C:4, 8C:1, 11C:1	4G:8, 6G:1
Chordata	Amphibia	Gymnophiona	Indotyphlidae	Gegeneophis	Gegeneophis ramaswamii	NC_006301.1	15897	4A:87, 5A:30, 6A:9, 7A:2, 8A:2	4T:107, 5T:33, 6T:8, 7T:6, 8T:1, 13T:1	4C:30, 5C:7, 6C:5, 7C:1	4G:8, 5G:1, 6G:1
Chordata	Amphibia	Gymnophiona	Scolecomorphidae	Scolecomorphus	Scolecomorphus vittatus	NC_006304.1	15973	4A:83, 5A:40, 6A:6, 7A:7, 8A:1, 9A:1	4T:80, 5T:35, 6T:8, 7T:8, 8T:1, 10T:1	4C:35, 5C:13, 6C:6, 7C:3	4G:5, 5G:7
Mollusca	Cephalopoda	Octopoda	Octopodidae	Octopus	Octopus vulgaris	AB158363.1	15744	4A:163, 5A:71, 6A:20, 7A:13, 8A:7, 9A:3, 10A:2	4T:105, 5T:43, 6T:8, 7T:2, 8T:3, 9T:1	4C:28, 5C:9, 6C:4, 7C:1
Chordata	Amphibia	Caudata	Plethodontidae	Plethodon	Plethodon elongatus	NC_006335.1	18767	4A:113, 5A:45, 6A:10, 7A:3, 8A:1	4T:109, 5T:33, 6T:13, 7T:2, 8T:2, 9T:4	4C:66, 5C:22, 6C:7, 7C:2, 8C:4	4G:9, 5G:2, 6G:2, 7G:1, 9G:2
Chordata	Amphibia	Caudata	Plethodontidae	Desmognathus	Desmognathus wrighti	NC_006337.1	16578	4A:114, 5A:38, 6A:17, 7A:4, 8A:1	4T:101, 5T:39, 6T:16, 7T:6, 8T:3, 9T:1, 10T:2	4C:37, 5C:12, 6C:3, 7C:2, 9C:1	4G:11, 5G:8, 6G:2, 7G:1, 11G:1
Chordata	Amphibia	Caudata	Plethodontidae	Phaeognathus	Phaeognathus hubrichti	NC_006344.1	16294	4A:83, 5A:38, 6A:18, 7A:4, 8A:1	4T:117, 5T:49, 6T:13, 7T:5, 8T:3, 9T:1, 13T:1	4C:39, 5C:10, 6C:6	4G:8, 5G:2
Chordata	Amphibia	Caudata	Plethodontidae	Ensatina	Ensatina eschscholtzii	NC_006328.1	22816	4A:162, 5A:93, 6A:17, 7A:16, 8A:1	4T:137, 5T:67, 6T:27, 7T:14, 8T:6, 9T:8, 10T:2, 11T:1	4C:48, 5C:26, 6C:5, 12C:1	4G:6, 5G:1, 8G:2, 9G:1, 10G:1
Chordata	Amphibia	Caudata	Plethodontidae	Hydromantes	Hydromantes brunus	NC_006345.1	17220	4A:96, 5A:52, 6A:16, 7A:4, 8A:1	4T:125, 5T:47, 6T:16, 7T:10, 8T:2, 9T:1, 11T:1	4C:32, 5C:7, 6C:4, 7C:2	4G:6, 5G:3, 7G:1, 8G:1
Chordata	Amphibia	Caudata	Plethodontidae	Oedipina	Oedipina poelzi	NC_006326.1	16731	4A:96, 5A:41, 6A:17, 7A:5, 8A:1, 12A:1	4T:72, 5T:17, 6T:6, 7T:4, 8T:1, 9T:1	4C:29, 5C:9, 6C:1	4G:14, 5G:6, 6G:1, 7G:2, 17G:1
Chordata	Amphibia	Caudata	Plethodontidae	Pseudotriton	Pseudotriton ruber	NC_006332.1	16661	4A:103, 5A:50, 6A:13, 7A:2, 8A:1, 9A:1	4T:90, 5T:37, 6T:10, 7T:4, 8T:2, 10T:2, 11T:1	4C:44, 5C:9, 6C:2, 12C:1	4G:15, 5G:6, 6G:1, 7G:1
Chordata	Amphibia	Caudata	Plethodontidae	Stereochilus	Stereochilus marginatus	NC_006325.1	19631	4A:150, 5A:44, 6A:24, 7A:9, 8A:2	4T:87, 5T:33, 6T:11, 7T:5, 8T:2, 9T:1, 10T:2, 11T:1	4C:52, 5C:25, 6C:7, 8C:2, 12C:1, 17C:1	4G:26, 5G:6, 6G:2, 7G:1, 8G:1, 10G:1
Chordata	Amphibia	Caudata	Rhyacotritonidae	Rhyacotriton	Rhyacotriton variegatus	NC_006331.1	21606	4A:143, 5A:41, 6A:17, 7A:9, 8A:1, 9A:1	4T:187, 5T:56, 6T:17, 7T:8, 8T:4, 10T:1	4C:41, 5C:18, 6C:4, 7C:1	4G:18, 5G:5, 6G:2, 9G:1, 12G:1, 14G:1
Chordata	Amphibia	Caudata	Plethodontidae	Hemidactylium	Hemidactylium scutatum	NC_006342.1	17421	4A:99, 5A:43, 6A:12, 7A:11, 8A:1, 9A:1, 10A:1	4T:103, 5T:53, 6T:10, 7T:5, 8T:2, 9T:2, 10T:1	4C:36, 5C:12, 6C:4	4G:16, 5G:1, 12G:1
Chordata	Actinopteri	Labriformes	Labridae	Chlorurus	Chlorurus sordidus	AP006567.1	16681	4A:55, 5A:29, 6A:11, 7A:2	4T:48, 5T:11, 6T:5	4C:80, 5C:45, 6C:10	4G:26, 5G:10
Chordata	Mammalia	Monotremata	Tachyglossidae	Zaglossus	Zaglossus bruijni	AJ639865.1	16367	4A:62, 5A:30, 6A:6, 7A:3	4T:62, 5T:19, 6T:13, 7T:4, 8T:3, 11T:1	4C:62, 5C:20, 6C:3, 7C:2, 17C:1	4G:16, 5G:5
Chordata	Aves	Galliformes	Numididae	Numida	Numida meleagris	AP005595.1	16726	4A:74, 5A:26, 6A:5, 7A:3, 10A:1	4T:27, 5T:8, 6T:3, 9T:1	4C:93, 5C:36, 6C:9, 7C:3, 8C:1	4G:13, 5G:4, 7G:1
Arthropoda	Insecta	Diptera	Oestridae	Dermatobia	Dermatobia hominis	NC_006378.1	16360	4A:159, 5A:69, 6A:25, 7A:8, 8A:6, 9A:4, 10A:1, 20A:1	4T:137, 5T:45, 6T:27, 7T:10, 8T:6, 10T:1, 20T:1	4C:11, 5C:5, 6C:2	4G:2
Chordata	Actinopteri	Siluriformes	Pangasiidae	Pangasianodon	Pangasianodon gigas	NC_006381.1	16533	4A:75, 5A:27, 6A:3, 7A:1	4T:37, 5T:10, 6T:2	4C:80, 5C:33, 6C:6	4G:15, 5G:9
Arthropoda	Insecta	Hemiptera	Aleyrodidae	Vasdavidius	Vasdavidius concursus	AY648941.2	11773	4A:91, 5A:21, 6A:7, 7A:2, 8A:1, 9A:1, 10A:2	4T:160, 5T:68, 6T:41, 7T:16, 8T:16, 9T:9, 10T:3, 11T:5, 12T:1, 18T:2, 19T:1, 25T:1	4C:3, 5C:1	4G:8, 5G:5, 8G:1
Arthropoda	Insecta	Hymenoptera	Pergidae	Perga	Perga condei	AY787816.1	13416	4A:129, 5A:61, 6A:37, 7A:14, 8A:6, 9A:4, 10A:1, 12A:1	4T:99, 5T:42, 6T:14, 7T:4, 8T:3, 9T:2, 12T:1	4C:20, 5C:8, 6C:4, 7C:2	4G:5
Chaetognatha	Sagittoidea	Phragmophora	Spadellidae	Spadella	Spadella cephaloptera	NC_006386.1	11905	4A:115, 5A:71, 6A:23, 7A:16, 8A:4, 9A:4, 10A:2	4T:60, 5T:24, 6T:5, 7T:11, 8T:2, 9T:1, 10T:1	4C:38, 5C:16, 6C:1	4G:21, 5G:7, 6G:1, 7G:2
Brachiopoda	Lingulata	Lingulida	Lingulidae	Lingula	Lingula anatina	AB178773.1	28818	4A:114, 5A:53, 6A:10, 7A:3, 8A:6, 9A:1, 11A:1	4T:254, 5T:126, 6T:50, 7T:17, 8T:3, 9T:2, 10T:2, 11T:5, 12T:1, 15T:1	4C:30, 5C:11, 6C:10, 7C:7, 8C:1	4G:87, 5G:31, 6G:15, 7G:5, 8G:5, 9G:3
Chordata	Actinopteri	Osmeriformes	Plecoglossidae	Plecoglossus	Plecoglossus altivelis	AB047553.2	16542	4A:31, 5A:12, 6A:4	4T:43, 5T:13, 6T:6, 7T:2, 10T:1	4C:83, 5C:41, 6C:13	4G:46, 5G:17, 6G:1, 7G:1
Chordata	Mammalia	Dasyuromorphia	Dasyuridae	Phascogale	Phascogale tapoatafa	AJ639869.1	17405	4A:77, 5A:29, 6A:11, 7A:1, 8A:1, 19A:1	4T:60, 5T:18, 6T:8, 7T:2, 8T:1, 9T:1	4C:54, 5C:17, 6C:6, 9C:1	4G:12, 5G:9, 6G:1, 7G:1
Chordata	Mammalia	Diprotodontia	Potoroidae	Potorous	Potorous tridactylus	AJ639873.1	16922	4A:83, 5A:44, 6A:11, 7A:3, 9A:1	4T:44, 5T:18, 8T:1, 10T:1	4C:42, 5C:20, 6C:2, 7C:1	4G:10, 5G:3, 11G:1
Chordata	Thaliacea	Doliolida	Doliolidae	Doliolum	Doliolum nationalis	AB176541.1	16351	4A:60, 5A:20, 6A:7, 7A:2, 13A:1, 14A:1, 19A:1, 40A:1	4T:96, 5T:44, 6T:10, 7T:2, 9T:1, 10T:1, 42T:1	4C:26, 5C:5, 6C:1	4G:16, 5G:7, 6G:1, 13G:1
Echinodermata	Asteroidea	Forcipulatida	Asteriidae	Asterias	Asterias amurensis	AB183559.1	16427	4A:100, 5A:31, 6A:14, 7A:5, 8A:2, 9A:2	4T:141, 5T:60, 6T:32, 7T:14, 8T:8, 9T:5	4C:25, 5C:12, 6C:5, 7C:1	4G:14, 5G:2, 6G:1, 9G:1
Echinodermata	Asteroidea	Paxillosida	Astropectinidae	Astropecten	Astropecten polyacanthus	AB183560.1	16304	4A:135, 5A:35, 6A:25, 7A:8, 8A:4, 9A:2, 10A:1, 18A:1	4T:125, 5T:52, 6T:24, 7T:10, 8T:2, 9T:1	4C:40, 5C:15, 6C:7, 8C:1	4G:10, 5G:2, 6G:2, 7G:1
Chordata	Amphibia	Anura	Alytidae	Alytes	Alytes obstetricans	NC_006688.1	17490	4A:62, 5A:21, 6A:3, 7A:3	4T:49, 5T:14, 6T:4, 7T:1	4C:63, 5C:46, 6C:17, 7C:5, 9C:1, 10C:1	4G:17, 5G:2, 8G:1
Chordata	Amphibia	Anura	Alytidae	Discoglossus	Discoglossus galganoi	NC_006690.1	17014	4A:61, 5A:26, 6A:1, 7A:2, 9A:1	4T:74, 5T:16, 6T:9, 7T:2	4C:65, 5C:24, 6C:7, 7C:1, 8C:2	4G:23, 5G:7, 6G:1, 7G:2, 8G:1
Chordata	Actinopteri	Osmeriformes	Salangidae	Salanx	Salanx ariakensis	AP006231.1	16587	4A:48, 5A:17, 6A:1, 7A:1	4T:34, 5T:13, 6T:2, 7T:2	4C:87, 5C:50, 6C:16	4G:31, 5G:17, 6G:4, 7G:2
Chordata	Actinopteri	Batrachoidiformes	Batrachoididae	Batrachomoeus	Batrachomoeus trispinosus	AP006738.1	17086	4A:116, 5A:37, 6A:16, 7A:8, 8A:2, 17A:1	4T:68, 5T:21, 6T:10, 7T:2	4C:74, 5C:31, 6C:8, 7C:1, 8C:1, 11C:2	4G:8, 5G:5
Chordata	Actinopteri	Batrachoidiformes	Batrachoididae	Porichthys	Porichthys myriaster	AP006739.1	18910	4A:74, 5A:44, 6A:4, 7A:1	4T:71, 5T:22, 6T:5, 7T:1, 10T:3	4C:86, 5C:41, 6C:21, 7C:3, 8C:1, 9C:1	4G:31, 5G:9, 6G:1, 10G:1
Chordata	Lepidosauria	Squamata	Agamidae	Pogona	Pogona vitticeps	AB166795.1	16751	4A:79, 5A:29, 6A:17, 7A:2, 8A:1, 9A:1	4T:41, 5T:18, 7T:4	4C:68, 5C:22, 6C:11, 7C:7, 8C:1	4G:12, 5G:4, 6G:1
Arthropoda	Malacostraca	Stomatopoda	Pseudosquillidae	Pseudosquilla	Pseudosquilla ciliata	AY947836.1	14621	4A:77, 5A:27, 6A:14, 7A:3	4T:128, 5T:37, 6T:16, 7T:8	4C:23, 5C:7, 6C:2	4G:13, 5G:4, 6G:1
Chordata	Mammalia	Artiodactyla	Balaenopteridae	Megaptera	Megaptera novaeangliae	AP006467.1	16398	4A:79, 5A:35, 6A:9, 7A:5	4T:38, 5T:11, 6T:1, 7T:1, 8T:1, 9T:1	4C:53, 5C:21, 6C:6, 10C:1	4G:8, 5G:3, 6G:1
Chordata	Mammalia	Artiodactyla	Balaenidae	Eubalaena	Eubalaena japonica	AP006474.1	16386	4A:78, 5A:38, 6A:7, 7A:4, 8A:1	4T:34, 5T:7, 6T:3	4C:67, 5C:20, 6C:7	4G:6, 5G:3, 8G:1
Chordata	Mammalia	Primates	Cercopithecidae	Colobus	Colobus guereza	NC_006901.1	16648	4A:74, 5A:36, 6A:8, 7A:5, 10A:1	4T:45, 5T:13, 6T:3, 7T:1, 8T:1	4C:66, 5C:23, 6C:8, 7C:2, 11C:1	4G:4, 5G:3, 6G:1
Acanthocephala	Palaeacanthocephala	Echinorhynchida	Rhadinorhynchidae	Leptorhynchoides	Leptorhynchoides thecatus	NC_006892.1	13888	4A:34, 5A:17, 6A:4, 7A:2, 8A:1, 9A:1	4T:212, 5T:94, 6T:28, 7T:19, 8T:4, 9T:1	4C:4	4G:39, 5G:16, 6G:9
Arthropoda	Malacostraca	Decapoda	Eriphiidae	Pseudocarcinus	Pseudocarcinus gigas	NC_006891.1	15515	4A:99, 5A:49, 6A:11, 7A:6, 8A:4, 9A:2, 10A:1	4T:121, 5T:50, 6T:17, 7T:6, 8T:5, 9T:2, 12T:1	4C:27, 5C:8	4G:7, 5G:2
Arthropoda	Insecta	Archaeognatha	Meinertellidae	Nesomachilis	Nesomachilis australica	NC_006895.1	15474	4A:147, 5A:54, 6A:26, 7A:11, 8A:7, 9A:4, 10A:1	4T:92, 5T:38, 6T:13, 7T:6, 8T:2, 9T:2, 10T:1, 14T:1	4C:30, 5C:12, 6C:1	4G:4, 5G:2, 6G:2
Cnidaria	Anthozoa	Scleractinia	Acroporidae	Anacropora	Anacropora matthai	NC_006898.1	17888	4A:81, 5A:15, 6A:10, 7A:4, 8A:1	4T:200, 5T:77, 6T:30, 7T:12, 8T:8, 9T:6, 10T:3, 11T:1, 12T:1	4C:15, 5C:5, 6C:4	4G:81, 5G:42, 6G:16, 7G:7, 8G:3, 9G:2
Arthropoda	Malacostraca	Stomatopoda	Squillidae	Harpiosquilla	Harpiosquilla harpax	NC_006916.1	15714	4A:96, 5A:48, 6A:14, 7A:6, 8A:3, 9A:1	4T:133, 5T:53, 6T:20, 7T:11, 8T:3, 10T:2	4C:21, 5C:14, 6C:2	4G:16, 5G:3, 6G:1
Arthropoda	Insecta	Diptera	Muscidae	Haematobia	Haematobia irritans	NC_007102.1	16078	4A:138, 5A:67, 6A:21, 7A:11, 8A:5, 9A:5, 10A:1, 22A:1	4T:175, 5T:58, 6T:26, 7T:2, 8T:6, 10T:1, 19T:1	4C:8, 5C:1
Cnidaria	Anthozoa	Scleractinia	Merulinidae	Orbicella	Orbicella faveolata	AP008978.1	16138	4A:87, 5A:36, 6A:13, 7A:6, 8A:4, 9A:5, 10A:3, 11A:1	4T:219, 5T:113, 6T:46, 7T:34, 8T:25, 9T:17, 10T:6, 11T:5, 12T:2, 13T:1	4C:14, 5C:5	4G:63, 5G:22, 6G:6, 7G:1, 8G:1, 10G:1
Chordata	Actinopteri	Cypriniformes	Catostomidae	Myxocyprinus	Myxocyprinus asiaticus	AB223007.1	16624	4A:55, 5A:19, 6A:2	4T:46, 5T:11, 6T:4, 7T:2, 8T:1	4C:79, 5C:22, 6C:11, 7C:1	4G:20, 5G:7, 6G:2
Mollusca	Bivalvia	Pectinida	Pectinidae	Placopecten	Placopecten magellanicus	NC_007234.1	32115	4A:70, 5A:51, 6A:8, 7A:9, 8A:6, 9A:6, 10A:2, 11A:2, 20A:2	4T:286, 5T:134, 6T:70, 7T:32, 8T:29, 9T:7, 10T:1, 11T:3, 17T:1, 20T:1	4C:41, 5C:19, 6C:11, 7C:13, 9C:1	4G:237, 5G:88, 6G:58, 7G:22, 8G:3, 10G:1
Arthropoda	Malacostraca	Decapoda	Potamidae	Geothelphusa	Geothelphusa dehaani	AB187570.1	18197	4A:159, 5A:58, 6A:20, 7A:5, 8A:4	4T:198, 5T:58, 6T:23, 7T:12, 8T:7, 9T:3, 10T:2	4C:27, 5C:7, 6C:3, 7C:1	4G:2, 5G:5
Chordata	Lepidosauria	Squamata	Viperidae	Ovophis	Ovophis okinavensis	AB175670.1	17388	4A:97, 5A:28, 6A:17, 7A:5, 8A:1	4T:42, 5T:17, 6T:7, 8T:2	4C:70, 5C:22, 6C:5, 7C:4, 8C:8, 9C:2	4G:22, 5G:2, 6G:2
Chordata	Lepidosauria	Squamata	Boidae	Boa	Boa constrictor	AB177354.1	18905	4A:146, 5A:35, 6A:37, 7A:7, 8A:4	4T:49, 5T:31	4C:43, 5C:10, 6C:1, 7C:1, 9C:4	4G:24, 5G:5, 6G:2, 8G:1
Chordata	Lepidosauria	Squamata	Pythonidae	Python	Python regius	AB177878.1	17245	4A:108, 5A:33, 6A:10, 7A:5, 8A:3	4T:42, 5T:15, 6T:7	4C:64, 5C:20, 6C:6, 7C:4, 9C:4	4G:11, 6G:2
Chordata	Lepidosauria	Squamata	Acrochordidae	Acrochordus	Acrochordus granulatus	AB177879.1	17604	4A:116, 5A:38, 6A:9, 7A:9, 8A:3, 9A:3	4T:56, 5T:23, 6T:5, 7T:1	4C:30, 5C:13, 6C:1, 7C:1, 8C:4	4G:5, 5G:4, 6G:2
Chordata	Lepidosauria	Squamata	Cylindrophiidae	Cylindrophis	Cylindrophis ruffus	AB179619.1	17499	4A:108, 5A:37, 6A:13, 7A:8, 8A:2	4T:34, 5T:16, 6T:2, 7T:4, 8T:1, 9T:1	4C:46, 5C:14, 6C:3, 7C:2, 8C:4	4G:8, 5G:3, 6G:1, 7G:1
Chordata	Lepidosauria	Squamata	Xenopeltidae	Xenopeltis	Xenopeltis unicolor	AB179620.1	18872	4A:118, 5A:67, 6A:13, 7A:4, 8A:6	4T:58, 5T:15, 6T:21, 7T:2	4C:39, 5C:16, 7C:1, 9C:4	4G:11, 5G:3
Chordata	Mammalia	Chiroptera	Pteropodidae	Rousettus	Rousettus aegyptiacus	AB205183.1	16706	4A:82, 5A:38, 6A:8, 10A:1	4T:46, 5T:7, 6T:2	4C:66, 5C:23, 6C:2, 7C:2	4G:10, 5G:4, 6G:1
Chordata	Actinopteri	Beloniformes	Exocoetidae	Cypselurus	Cypselurus hiraii	AB182653.1	16528	4A:72, 5A:29, 6A:6, 7A:1	4T:56, 5T:11, 6T:7, 7T:1	4C:69, 5C:28, 6C:6, 7C:2	4G:15, 5G:3
Chordata	Actinopteri	Gadiformes	Gadidae	Merlangius	Merlangius merlangus	NC_007395.1	16569	4A:70, 5A:22, 6A:7	4T:84, 5T:31, 6T:8, 9T:1, 17T:1	4C:71, 5C:21, 6C:4, 7C:1	4G:15, 5G:9
Chordata	Mammalia	Artiodactyla	Bovidae	Pantholops	Pantholops hodgsonii	NC_007441.1	16498	4A:80, 5A:36, 6A:11, 7A:4, 8A:2	4T:46, 5T:13, 6T:5	4C:54, 5C:16, 6C:6	4G:8, 5G:4
Arthropoda	Malacostraca	Stomatopoda	Squillidae	Squilla	Squilla empusa	NC_007444.1	15828	4A:101, 5A:40, 6A:18, 7A:6, 8A:3, 9A:3	4T:134, 5T:43, 6T:13, 7T:6, 8T:6, 9T:3	4C:26, 5C:10, 6C:1	4G:15, 5G:3, 6G:4
Arthropoda	Malacostraca	Stomatopoda	Lysiosquillidae	Lysiosquillina	Lysiosquillina maculata	NC_007443.1	16325	4A:86, 5A:19, 6A:5, 7A:3, 8A:2	4T:83, 5T:39, 6T:10, 7T:2, 8T:3	4C:41, 5C:10, 6C:1	4G:12, 5G:4, 6G:1
Arthropoda	Arachnida	Trombidiformes	Trombiculidae	Leptotrombidium	Leptotrombidium akamushi	AB194045.1	13698	4A:135, 5A:52, 6A:27, 7A:8, 8A:5, 9A:3, 10A:2	4T:136, 5T:63, 6T:20, 7T:11, 8T:7, 9T:3, 10T:3	4C:31, 5C:11, 6C:3, 7C:1, 8C:2	4G:23, 5G:11, 6G:1, 7G:1, 8G:2
Arthropoda	Insecta	Phasmatodea	Timematidae	Timema	Timema californicum	DQ241799.1	14387	4A:136, 5A:41, 6A:15, 7A:7, 8A:4, 9A:3	4T:79, 5T:21, 6T:10, 7T:1	4C:11, 5C:7, 6C:1	4G:23, 5G:4, 6G:3
Arthropoda	Insecta	Grylloblattodea	Grylloblattidae	Grylloblatta	Grylloblatta sculleni	DQ241796.1	15595	4A:136, 5A:46, 6A:18, 7A:14, 8A:1, 10A:1	4T:71, 5T:18, 6T:9, 7T:2	4C:31, 5C:21, 6C:5	4G:16, 5G:5, 6G:1, 7G:1
Arthropoda	Insecta	Hymenoptera	Vanhorniidae	Vanhornia	Vanhornia eucnemidarum	DQ302100.1	16574	4A:161, 5A:63, 6A:44, 7A:13, 8A:10, 9A:3, 10A:2, 11A:1, 20A:1	4T:132, 5T:31, 6T:13, 7T:1, 8T:4, 9T:1	4C:14, 5C:6, 6C:1	4G:1
Chordata	Mammalia	Dasyuromorphia	Dasyuridae	Sminthopsis	Sminthopsis crassicaudata	NC_007631.1	17363	4A:70, 5A:31, 6A:8, 7A:5, 8A:2, 10A:1	4T:67, 5T:18, 6T:5, 9T:1	4C:51, 5C:12, 6C:2, 7C:2, 9C:1	4G:13, 5G:8, 6G:1
Chordata	Mammalia	Artiodactyla	Lipotidae	Lipotes	Lipotes vexillifer	NC_007629.1	16392	4A:75, 5A:38, 6A:10, 7A:7, 8A:4	4T:48, 5T:13, 6T:3, 7T:1	4C:55, 5C:18, 6C:6	4G:4, 5G:4, 9G:1
Chordata	Mammalia	Peramelemorphia	Peroryctidae	Echymipera	Echymipera rufescens	NC_007632.1	16642	4A:75, 5A:33, 6A:9, 7A:3, 8A:2, 9A:1, 12A:1	4T:94, 5T:23, 6T:6	4C:34, 5C:8	4G:7, 5G:2
Chordata	Mammalia	Artiodactyla	Cervidae	Rangifer	Rangifer tarandus	AB245426.1	16362	4A:83, 5A:38, 6A:9, 7A:5, 9A:1, 10A:1	4T:70, 5T:22, 6T:6, 7T:1, 9T:1	4C:35, 5C:9, 6C:1, 8C:1	4G:5, 5G:2, 6G:2
Arthropoda	Insecta	Archaeognatha	Machilidae	Petrobius	Petrobius brevistylis	NC_007688.1	15698	4A:128, 5A:54, 6A:19, 7A:7, 8A:3, 9A:2, 10A:1	4T:97, 5T:32, 6T:13, 7T:3, 8T:1	4C:21, 5C:4, 6C:1	4G:14, 5G:7, 6G:1, 8G:1
Echinodermata	Crinoidea	Cyrtocrinida	Sclerocrinidae	Neogymnocrinus	Neogymnocrinus richeri	NC_007689.1	15966	4A:26, 5A:10, 6A:4	4T:237, 5T:133, 6T:66, 7T:29, 8T:12, 9T:6, 10T:1	4C:5	4G:19, 5G:9, 6G:1
Arthropoda	Insecta	Mantophasmatodea	Mantophasmatidae	Sclerophasma	Sclerophasma paresisense	NC_007701.1	15500	4A:160, 5A:59, 6A:25, 7A:9, 8A:3, 9A:3, 10A:1, 11A:1	4T:97, 5T:32, 6T:8, 7T:3, 8T:2, 10T:1	4C:4, 5C:3	4G:2, 5G:2, 6G:1
Arthropoda	Insecta	Mantodea	Mantidae	Tamolanica	Tamolanica tamolana	NC_007702.1	16055	4A:161, 5A:70, 6A:15, 7A:14, 8A:8, 9A:4, 10A:1, 11A:2	4T:149, 5T:53, 6T:11, 7T:7, 8T:4	4C:11, 6C:1, 7C:1	4G:6, 5G:1
Echinodermata	Crinoidea	Comatulida	Comatulidae	Phanogenia	Phanogenia gracilis	NC_007690.1	15892	4A:91, 5A:39, 6A:8, 7A:5, 8A:3, 10A:1	4T:246, 5T:149, 6T:61, 7T:31, 8T:27, 9T:12, 10T:5, 11T:1	4C:3	4G:19, 5G:6
Chordata	Aves	Pelecaniformes	Threskiornithidae	Nipponia	Nipponia nippon	AB104902.1	16732	4A:71, 5A:29, 6A:8, 7A:3	4T:20, 5T:7, 6T:3, 7T:1, 8T:1	4C:81, 5C:38, 6C:7, 7C:4, 9C:1	4G:11, 5G:4, 6G:2
Chordata	Actinopteri	Tetraodontiformes	Molidae	Ranzania	Ranzania laevis	AP006047.1	16478	4A:57, 5A:23, 6A:4	4T:42, 5T:15, 6T:2	4C:93, 5C:35, 6C:10, 7C:1, 11C:1	4G:26, 5G:10
Chordata	Amphibia	Anura	Mantellidae	Mantella	Mantella madagascariensis	AB212225.1	22874	4A:106, 5A:27, 6A:10, 7A:6, 8A:1	4T:128, 5T:47, 6T:16, 7T:7, 8T:2, 9T:2	4C:61, 5C:22, 6C:6, 8C:6	4G:22
Chordata	Amphibia	Anura	Pelobatidae	Pelobates	Pelobates cultripes	AJ871086.1	17384	4A:61, 5A:26, 6A:7, 7A:5	4T:81, 5T:22, 6T:12, 7T:11	4C:68, 5C:26, 6C:11, 7C:1	4G:18, 5G:8, 6G:1
Chordata	Amphibia	Anura	Ascaphidae	Ascaphus	Ascaphus truei	AJ871087.1	17790	4A:90, 5A:25, 6A:5, 7A:4, 8A:1	4T:101, 5T:33, 6T:12, 7T:2, 8T:2, 11T:1	4C:75, 5C:25, 6C:6, 7C:2, 8C:1	4G:27, 5G:4, 6G:2, 7G:1
Chordata	Leptocardii	Amphioxiformes	Branchiostomatidae	Branchiostoma	Branchiostoma japonicum	DQ407722.1	15075	4A:57, 5A:15, 6A:2, 7A:1	4T:138, 5T:52, 6T:18, 7T:7, 8T:3, 9T:1	4C:6, 5C:5, 6C:1	4G:44, 5G:22, 6G:7, 7G:2, 8G:1
Chordata	Actinopteri	Clupeiformes	Denticipitidae	Denticeps	Denticeps clupeoides	AP007276.1	17156	4A:73, 5A:40, 6A:10, 7A:2	4T:64, 5T:26, 6T:6, 7T:1	4C:53, 5C:19, 6C:4, 7C:2	4G:15, 5G:5, 6G:1
Chordata	Actinopteri	Gonorynchiformes	Kneriidae	Grasseichthys	Grasseichthys gabonensis	AP007277.1	16867	4A:74, 5A:35, 6A:5, 7A:6, 8A:1	4T:59, 5T:26, 6T:7, 7T:1, 8T:1	4C:61, 5C:34, 6C:11, 7C:2	4G:19, 5G:9, 6G:2
Chordata	Actinopteri	Gonorynchiformes	Kneriidae	Kneria	Kneria sp.	AP007278.1	16428	4A:77, 5A:27, 6A:5, 7A:3	4T:65, 5T:14, 6T:3, 7T:1, 8T:2	4C:62, 5C:29, 6C:10, 10C:1	4G:23, 5G:8, 6G:3
Chordata	Actinopteri	Gonorynchiformes	Kneriidae	Parakneria	Parakneria cameronensis	AP007279.1	16619	4A:82, 5A:30, 6A:7, 7A:2	4T:44, 5T:14, 6T:7	4C:63, 5C:35, 6C:11	4G:15, 5G:3, 6G:2
Chordata	Actinopteri	Gonorynchiformes	Kneriidae	Phractolaemus	Phractolaemus ansorgii	AP007280.1	16511	4A:88, 5A:33, 6A:8, 7A:3	4T:49, 5T:9, 6T:1, 10T:1	4C:73, 5C:32, 6C:12	4G:15, 5G:6, 7G:1
Mollusca	Cephalopoda	Oegopsida	Enoploteuthidae	Watasenia	Watasenia scintillans	AB240152.1	20093	4A:111, 5A:37, 6A:18, 7A:10, 8A:6, 9A:1, 10A:1	4T:119, 5T:49, 6T:19, 7T:8, 8T:6	4C:30, 5C:5, 6C:4, 7C:2	4G:15, 5G:5, 6G:2
Mollusca	Cephalopoda	Oegopsida	Ommastrephidae	Todarodes	Todarodes pacificus	AB240153.1	20247	4A:139, 5A:54, 6A:27, 7A:14, 8A:6	4T:142, 5T:42, 6T:6, 7T:7, 8T:2	4C:37, 5C:11, 6C:2, 9C:2	4G:7, 5G:3, 7G:1
Mollusca	Cephalopoda	Myopsida	Loliginidae	Sepioteuthis	Sepioteuthis lessoniana	AB240154.1	16631	4A:113, 5A:51, 6A:23, 7A:10, 8A:2, 9A:2	4T:107, 5T:35, 6T:10, 7T:3, 8T:1	4C:35, 5C:12, 6C:1	4G:3, 5G:2, 10G:2
Mollusca	Cephalopoda	Octopoda	Octopodidae	Amphioctopus	Amphioctopus fangsiao	AB240156.1	15979	4A:153, 5A:56, 6A:29, 7A:19, 8A:8, 9A:5, 10A:2	4T:127, 5T:33, 6T:10, 7T:5, 8T:2, 10T:1	4C:29, 5C:8, 6C:2, 8C:1
Chordata	Aves	Passeriformes	Estrildidae	Taeniopygia	Taeniopygia guttata	NC_007897.1	16853	4A:77, 5A:26, 6A:7, 7A:1	4T:22, 5T:9	4C:71, 5C:35, 6C:6, 7C:1, 8C:2, 12C:1	4G:8
Chordata	Actinopteri	Tetraodontiformes	Tetraodontidae	Canthigaster	Canthigaster rivulata	AP006744.1	16446	4A:74, 5A:26, 6A:11, 7A:2	4T:46, 5T:9, 6T:1, 9T:1	4C:78, 5C:46, 6C:13	4G:13, 5G:9
Chordata	Actinopteri	Tetraodontiformes	Tetraodontidae	Sphoeroides	Sphoeroides pachygaster	AP006745.1	16444	4A:68, 5A:24, 6A:10, 7A:1, 9A:1	4T:45, 5T:16, 6T:5, 7T:4, 9T:1	4C:74, 5C:31, 6C:2, 7C:1	4G:20, 5G:8, 6G:1
Chordata	Amphibia	Gymnophiona	Siphonopidae	Siphonops	Siphonops annulatus	NC_007911.1	16202	4A:89, 5A:35, 6A:9, 7A:4, 8A:2, 9A:1	4T:87, 5T:21, 6T:7, 7T:7, 10T:2	4C:35, 5C:10, 7C:3, 10C:1	4G:9, 5G:2
Arthropoda	Malacostraca	Isopoda	Idoteidae	Idotea	Idotea baltica	DQ442915.1	14247	4A:49, 5A:24, 6A:4, 7A:1	4T:124, 5T:45, 6T:13, 7T:3, 8T:1, 9T:1	4C:29, 5C:8, 6C:6	4G:59, 5G:23, 6G:8
Arthropoda	Malacostraca	Isopoda	Ligiidae	Ligia	Ligia oceanica	DQ442914.1	15289	4A:65, 5A:21, 6A:10, 7A:3	4T:85, 5T:26, 6T:13, 7T:5, 8T:1	4C:27, 5C:16, 6C:4, 10C:1	4G:51, 5G:7, 6G:10, 7G:1
Chordata	Aves	Charadriiformes	Alcidae	Synthliboramphus	Synthliboramphus antiquus	AP009042.1	16730	4A:81, 5A:27, 6A:5, 7A:3, 8A:1	4T:26, 5T:7, 6T:1, 11T:1	4C:69, 5C:30, 6C:10, 7C:1, 12C:1	4G:12, 5G:2, 6G:1
Chordata	Aves	Phaethontiformes	Phaethontidae	Phaethon	Phaethon rubricauda	AP009043.1	17777	4A:66, 5A:24, 6A:5	4T:20, 5T:16, 6T:3, 7T:1, 10T:1	4C:106, 5C:49, 6C:13, 7C:4, 8C:1, 9C:1	4G:14, 5G:1, 6G:1
Chordata	Mammalia	Diprotodontia	Acrobatidae	Distoechurus	Distoechurus pennatus	AB241052.1	16775	4A:86, 5A:35, 6A:8, 7A:3, 9A:1	4T:59, 5T:13, 6T:5, 7T:1, 9T:1	4C:44, 5C:19, 6C:3	4G:6, 7G:1
Chordata	Mammalia	Diprotodontia	Phascolarctidae	Phascolarctos	Phascolarctos cinereus	AB241053.1	16357	4A:90, 5A:34, 6A:7, 7A:4, 8A:1, 9A:1	4T:39, 5T:10, 6T:2, 7T:3	4C:48, 5C:10, 6C:2	4G:5, 5G:1
Chordata	Mammalia	Diprotodontia	Petauridae	Dactylopsila	Dactylopsila trivirgata	AB241054.1	16058	4A:74, 5A:36, 6A:6, 7A:5, 8A:2	4T:36, 5T:12, 6T:3	4C:40, 5C:8, 6C:1	4G:7, 5G:2
Chordata	Mammalia	Diprotodontia	Petauridae	Petaurus	Petaurus breviceps	AB241055.1	16103	4A:96, 5A:34, 6A:8, 7A:1, 8A:1	4T:69, 5T:12, 6T:5, 7T:1, 8T:1	4C:33, 5C:7	4G:9, 5G:1, 13G:1
Chordata	Mammalia	Diprotodontia	Macropodidae	Lagorchestes	Lagorchestes hirsutus	AB241056.1	16889	4A:80, 5A:40, 6A:8, 7A:2, 8A:1, 9A:1	4T:55, 5T:7, 6T:1	4C:43, 5C:18, 6C:4	4G:9, 5G:2, 14G:1
Chordata	Mammalia	Diprotodontia	Phalangeridae	Phalanger	Phalanger vestitus	AB241057.1	15318	4A:82, 5A:27, 6A:10, 7A:2, 8A:4	4T:27, 5T:7, 6T:2	4C:33, 5C:13, 6C:4	4G:4
Chordata	Actinopteri	Gadiformes	Gadidae	Microgadus	Microgadus proximus	DQ356944.1	15511	4A:57, 5A:23, 6A:6	4T:61, 5T:23, 6T:4, 7T:1	4C:74, 5C:38, 6C:3	4G:16, 5G:11
Mollusca	Cephalopoda	Nautilida	Nautilidae	Nautilus	Nautilus macromphalus	NC_007980.1	16258	4A:110, 5A:42, 6A:20, 7A:10, 8A:4, 9A:2, 10A:3, 20A:1	4T:62, 5T:19, 6T:6, 10T:1	4C:84, 5C:34, 6C:13, 7C:3, 9C:1, 10C:1	4G:15, 5G:3
Arthropoda	Insecta	Lepidoptera	Lycaenidae	Coreana	Coreana raphaelis	NC_007976.1	15314	4A:142, 5A:43, 6A:21, 7A:8, 8A:5, 9A:3, 10A:2, 11A:1	4T:189, 5T:74, 6T:36, 7T:17, 8T:12, 9T:2, 10T:5, 19T:1	4C:6, 5C:5, 6C:1	4G:1, 6G:1
Nematoda	Enoplea	Mermithida	Mermithidae	Thaumamermis	Thaumamermis cosgrovei	NC_008046.1	20013	4A:142, 5A:48, 6A:9, 7A:1, 8A:2, 9A:1	4T:253, 5T:100, 6T:31, 7T:18, 8T:4, 10T:1, 11T:1	4C:11, 5C:5, 6C:1	4G:32, 5G:3, 6G:2
Chordata	Lepidosauria	Squamata	Agamidae	Xenagama	Xenagama taylori	NC_008065.1	16220	4A:115, 5A:51, 6A:19, 7A:11, 8A:2	4T:66, 5T:21, 6T:10, 7T:1, 8T:2, 9T:1	4C:51, 5C:12, 6C:3, 7C:3, 8C:2	4G:13, 5G:5
Chordata	Aves	Sphenisciformes	Spheniscidae	Eudyptes	Eudyptes chrysocome	AP009189.1	16930	4A:79, 5A:27, 6A:6, 7A:2	4T:26, 5T:5, 8T:1	4C:84, 5C:44, 6C:7, 7C:4, 8C:2	4G:11, 5G:3
Chordata	Aves	Gaviiformes	Gaviidae	Gavia	Gavia pacifica	AP009190.1	15574	4A:68, 5A:27, 6A:4, 7A:2	4T:19, 5T:4, 6T:1	4C:64, 5C:38, 6C:8	4G:11, 5G:2
Chordata	Aves	Procellariiformes	Procellariidae	Procellaria	Procellaria cinerea	AP009191.1	14818	4A:78, 5A:22, 6A:7, 7A:2	4T:25, 5T:6, 6T:1	4C:64, 5C:22, 6C:5	4G:13, 5G:5
Chordata	Aves	Podicipediformes	Podicipedidae	Podiceps	Podiceps cristatus	AP009194.1	16134	4A:81, 5A:26, 6A:6, 7A:4	4T:21, 5T:4, 6T:1	4C:66, 5C:32, 6C:9, 7C:2, 12C:1	4G:8, 5G:2
Chordata	Actinopteri	Cypriniformes	Leuciscidae	Campostoma	Campostoma anomalum	NC_008102.1	16654	4A:53, 5A:10, 6A:4, 7A:2	4T:46, 5T:13, 6T:2, 7T:1	4C:63, 5C:26, 6C:12, 7C:1	4G:27, 5G:6
Chordata	Actinopteri	Cypriniformes	Leuciscidae	Phenacobius	Phenacobius mirabilis	NC_008112.1	16884	4A:73, 5A:25, 6A:4, 7A:3	4T:66, 5T:19, 6T:3, 7T:1, 8T:1	4C:83, 5C:28, 6C:9	4G:35, 5G:8, 6G:1, 12G:1
Bryozoa	Gymnolaemata	Ctenostomatida	Flustrellidridae	Flustrellidra	Flustrellidra hispida	NC_008192.1	13026	4A:36, 5A:11, 6A:6, 7A:2, 8A:2, 9A:2, 10A:1	4T:93, 5T:39, 6T:11, 7T:6, 8T:3, 9T:3, 10T:1, 12T:1	4C:37, 5C:11, 6C:4, 7C:4, 8C:1	4G:24, 5G:6, 6G:2
Chordata	Actinopteri	Gadiformes	Macrouridae	Bathygadus	Bathygadus antrodes	AP008988.1	17596	4A:71, 5A:26, 6A:9, 7A:2, 9A:1	4T:154, 5T:51, 6T:15, 7T:8, 8T:2	4C:39, 5C:12, 6C:2	4G:40, 5G:12, 6G:1, 7G:2
Chordata	Actinopteri	Gadiformes	Macrouridae	Squalogadus	Squalogadus modificatus	AP008989.1	16550	4A:72, 5A:25, 6A:9, 7A:3	4T:76, 5T:20, 6T:9, 7T:2, 9T:2, 10T:1	4C:84, 5C:34, 6C:7, 7C:2	4G:16, 5G:6, 6G:2
Chordata	Actinopteri	Gadiformes	Macrouridae	Trachyrincus	Trachyrincus murrayi	AP008990.1	16677	4A:66, 5A:26, 6A:6, 7A:2	4T:82, 5T:28, 6T:9, 7T:3	4C:74, 5C:24, 6C:7, 7C:1	4G:20, 5G:7
Chordata	Actinopteri	Gadiformes	Macrouridae	Ventrifossa	Ventrifossa garmani	AP008991.1	17230	4A:69, 5A:26, 6A:6, 7A:2	4T:57, 5T:14, 6T:8	4C:79, 5C:49, 6C:23	4G:17, 5G:7
Chordata	Mammalia	Primates	Cercopithecidae	Nasalis	Nasalis larvatus	NC_008216.1	16570	4A:76, 5A:39, 6A:8, 7A:3, 8A:1	4T:54, 5T:12, 6T:1, 10T:1	4C:60, 5C:13, 6C:2, 7C:1, 14C:1	4G:4, 5G:2
Chordata	Mammalia	Primates	Cercopithecidae	Pygathrix	Pygathrix nemaeus	NC_008220.1	15467	4A:69, 5A:31, 6A:10, 7A:4, 8A:1	4T:52, 5T:15, 6T:1	4C:53, 5C:14, 6C:3	4G:7, 5G:5
Chordata	Mammalia	Primates	Cercopithecidae	Presbytis	Presbytis melalophos	NC_008217.1	16543	4A:78, 5A:35, 6A:6, 7A:7, 11A:1	4T:57, 5T:13, 6T:3	4C:58, 5C:18, 6C:2, 7C:2	4G:4, 5G:9
Chordata	Mammalia	Primates	Cercopithecidae	Piliocolobus	Piliocolobus badius	NC_008219.1	16595	4A:71, 5A:33, 6A:7, 7A:5, 9A:2	4T:55, 5T:14, 6T:4, 9T:1	4C:54, 5C:17, 6C:4, 7C:2	4G:8, 5G:4
Cnidaria	Anthozoa	Zoantharia	Parazoanthidae	Savalia	Savalia savaglia	DQ825686.1	20764	4A:50, 5A:22, 6A:3, 7A:2	4T:111, 5T:51, 6T:18, 7T:7, 9T:2	4C:81, 5C:42, 6C:17, 7C:11, 8C:2, 9C:2	4G:111, 5G:52, 6G:20, 7G:11, 8G:9
Chordata	Actinopteri	Siluriformes	Cranoglanididae	Cranoglanis	Cranoglanis bouderius	NC_008280.1	16539	4A:79, 5A:26, 6A:6, 7A:3	4T:47, 5T:18, 6T:4, 7T:1	4C:86, 5C:16, 6C:10	4G:14, 5G:7, 6G:2
Chordata	Actinopteri	Pleuronectiformes	Soleidae	Solea	Solea senegalensis	AB270760.1	16659	4A:65, 5A:28, 6A:3, 7A:2, 8A:2	4T:51, 5T:13, 6T:7, 7T:3	4C:90, 5C:46, 6C:11, 7C:4	4G:16, 5G:9, 7G:1
Chordata	Lepidosauria	Squamata	Lacertidae	Lacerta	Lacerta viridis	AM176577.1	17156	4A:99, 5A:33, 6A:10, 7A:5, 8A:2	4T:93, 5T:26, 6T:22, 7T:3, 8T:3	4C:69, 5C:20, 6C:7, 7C:1, 9C:1, 12C:1	4G:14, 5G:6, 6G:2, 7G:1
Chordata	Mammalia	Carnivora	Otariidae	Callorhinus	Callorhinus ursinus	AM181016.1	16668	4A:70, 5A:37, 6A:11, 7A:3, 8A:1	4T:34, 5T:12	4C:53, 5C:18, 6C:7	4G:7, 5G:2, 9G:1
Chordata	Mammalia	Carnivora	Otariidae	Zalophus	Zalophus californianus	AM181017.1	16677	4A:82, 5A:33, 6A:10, 7A:2, 8A:1	4T:31, 5T:10, 6T:3, 7T:1	4C:50, 5C:16, 6C:10	4G:5, 5G:4, 10G:1
Chordata	Mammalia	Carnivora	Otariidae	Phocarctos	Phocarctos hookeri	AM181019.1	16722	4A:83, 5A:37, 6A:9, 7A:3, 8A:1	4T:30, 5T:11, 6T:1, 7T:1	4C:51, 5C:15, 6C:6, 11C:1	4G:7, 5G:2, 10G:1
Chordata	Mammalia	Carnivora	Otariidae	Neophoca	Neophoca cinerea	AM181020.1	16736	4A:79, 5A:38, 6A:7, 7A:3, 8A:2	4T:39, 5T:14, 6T:2	4C:51, 5C:15, 6C:9	4G:8, 5G:4, 7G:1
Chordata	Mammalia	Carnivora	Otariidae	Arctocephalus	Arctocephalus townsendi	AM181021.1	16571	4A:80, 5A:32, 6A:11, 7A:1, 9A:1	4T:41, 5T:11, 6T:2	4C:51, 5C:15, 6C:6	4G:8, 5G:4, 9G:1
Chordata	Mammalia	Carnivora	Phocidae	Mirounga	Mirounga leonina	AM181023.1	16970	4A:83, 5A:41, 6A:9, 7A:4, 8A:2	4T:37, 5T:13, 6T:1	4C:54, 5C:15, 6C:5	4G:3, 5G:1, 7G:1
Chordata	Mammalia	Carnivora	Phocidae	Lobodon	Lobodon carcinophaga	AM181024.1	16759	4A:77, 5A:41, 6A:9, 7A:5	4T:35, 5T:7, 6T:2	4C:53, 5C:16, 6C:4, 9C:1	4G:7, 5G:1, 9G:1
Chordata	Mammalia	Carnivora	Phocidae	Leptonychotes	Leptonychotes weddellii	AM181025.1	16603	4A:85, 5A:36, 6A:11, 7A:3, 8A:1	4T:28, 5T:12, 6T:1	4C:55, 5C:11, 6C:4, 7C:1	4G:5, 5G:3, 9G:1
Chordata	Mammalia	Carnivora	Phocidae	Hydrurga	Hydrurga leptonyx	AM181026.1	16602	4A:81, 5A:40, 6A:10, 7A:4, 8A:1	4T:33, 5T:10, 6T:2	4C:50, 5C:13, 6C:6, 9C:1	4G:4, 5G:2, 7G:1
Chordata	Mammalia	Carnivora	Phocidae	Erignathus	Erignathus barbatus	AM181027.1	16705	4A:77, 5A:35, 6A:9, 7A:1, 8A:2	4T:31, 5T:11, 6T:2	4C:56, 5C:14, 6C:6, 7C:1, 8C:1	4G:4, 5G:4, 6G:1
Chordata	Mammalia	Carnivora	Phocidae	Cystophora	Cystophora cristata	AM181028.1	16952	4A:73, 5A:36, 6A:13, 7A:1, 8A:2	4T:28, 5T:12, 6T:1	4C:52, 5C:19, 6C:6, 7C:1, 10C:1	4G:4, 5G:3, 9G:1
Chordata	Mammalia	Diprotodontia	Macropodidae	Lagostrophus	Lagostrophus fasciatus	AM262148.1	16866	4A:69, 5A:40, 6A:8, 7A:2, 8A:2	4T:50, 5T:14, 6T:3	4C:46, 5C:16, 6C:4	4G:7, 5G:3, 19G:1
Cnidaria	Anthozoa	Antipatharia	Cladopathidae	Chrysopathes	Chrysopathes formosa	NC_008411.1	18398	4A:62, 5A:21, 6A:2, 7A:5	4T:153, 5T:51, 6T:10, 7T:7, 8T:1, 9T:2	4C:28, 5C:14, 6C:8	4G:70, 5G:20, 6G:8, 7G:1, 8G:1, 9G:1
Arthropoda	Malacostraca	Decapoda	Atyidae	Halocaridina	Halocaridina rubra	NC_008413.1	16065	4A:133, 5A:39, 6A:23, 7A:9, 8A:3, 9A:1, 10A:1	4T:94, 5T:30, 6T:6, 7T:4, 8T:2	4C:63, 5C:30, 6C:6, 7C:6, 10C:1	4G:16, 5G:2, 6G:2, 7G:1
Chordata	Actinopteri	Galaxiiformes	Galaxiidae	Galaxiella	Galaxiella nigrostriata	AP006853.1	19017	4A:85, 5A:34, 6A:7, 7A:1	4T:122, 5T:45, 6T:20, 7T:5, 8T:1, 10T:1	4C:62, 5C:37, 6C:4, 7C:1, 8C:3, 10C:1	4G:21, 5G:13, 6G:1, 19G:1
Chordata	Mammalia	Carnivora	Felidae	Neofelis	Neofelis nebulosa	NC_008450.1	16844	4A:74, 5A:37, 6A:10, 7A:5, 8A:3	4T:40, 5T:11, 6T:4	4C:55, 5C:16, 6C:3	4G:9, 5G:7
Mollusca	Bivalvia	Cardiida	Cardiidae	Acanthocardia	Acanthocardia tuberculata	NC_008452.1	16104	4A:42, 5A:15, 6A:6, 10A:2, 12A:1	4T:148, 5T:64, 6T:35, 7T:8, 8T:2, 9T:4	4C:16, 5C:7, 6C:2, 7C:1	4G:68, 5G:17, 6G:9, 7G:4, 8G:1
Chordata	Actinopteri	Pleuronectiformes	Pleuronectidae	Verasper	Verasper moseri	NC_008461.1	17588	4A:78, 5A:24, 6A:7	4T:82, 5T:15, 6T:3, 7T:2, 11T:1	4C:74, 5C:32, 6C:15, 7C:2	4G:24, 5G:12, 6G:2
Mollusca	Gastropoda	Cephalaspidea	Smaragdinellidae	Smaragdinella	Smaragdinella calyculata	DQ991938.1	13855	4A:55, 5A:13, 6A:7, 7A:4	4T:89, 5T:40, 6T:19, 7T:7, 8T:1	4C:13, 5C:5	4G:43, 5G:18, 6G:2
Chordata	Aves	Apodiformes	Apodidae	Apus	Apus apus	AM237310.1	17037	4A:78, 5A:26, 6A:6, 7A:6	4T:23, 5T:6, 6T:5, 7T:1	4C:85, 5C:31, 6C:9, 7C:4, 8C:1	4G:10, 5G:3
Chordata	Aves	Accipitriformes	Pandionidae	Pandion	Pandion haliaetus	NC_008550.1	17864	4A:82, 5A:25, 6A:7, 7A:1, 8A:1	4T:29, 5T:11, 6T:5, 7T:2, 9T:2	4C:65, 5C:32, 6C:10, 7C:2, 11C:1, 17C:1	4G:15, 5G:3, 6G:1
Chordata	Aves	Falconiformes	Falconidae	Micrastur	Micrastur gilvicollis	NC_008548.1	17344	4A:92, 5A:26, 6A:7, 7A:2	4T:24, 5T:14, 6T:7, 7T:1, 9T:1	4C:78, 5C:51, 6C:8, 7C:3, 8C:1, 12C:2	4G:8, 5G:1, 7G:1, 9G:1
Chordata	Aves	Piciformes	Ramphastidae	Pteroglossus	Pteroglossus azara	NC_008549.1	18736	4A:76, 5A:27, 6A:14, 7A:2, 8A:1	4T:26, 5T:12, 6T:13, 11T:1, 13T:1	4C:103, 5C:55, 6C:12, 7C:9, 8C:1, 12C:1	4G:11, 5G:7
Chordata	Mammalia	Rodentia	Anomaluridae	Anomalurus	Anomalurus sp.	AM159537.1	16923	4A:74, 5A:45, 6A:11, 7A:5, 8A:2	4T:44, 5T:15, 6T:4, 7T:2	4C:56, 5C:19, 6C:6, 7C:2	4G:4, 5G:3
Chordata	Lepidosauria	Squamata	Boidae	Eunectes	Eunectes notaeus	AM236347.1	17970	4A:115, 5A:62, 6A:15, 7A:5, 8A:2, 9A:1	4T:43, 5T:8, 6T:16, 9T:2	4C:32, 5C:10, 6C:1, 7C:1, 8C:4	4G:15, 5G:5
Chordata	Lepidosauria	Squamata	Colubridae	Pantherophis	Pantherophis guttatus	AM236349.1	16445	4A:94, 5A:35, 6A:15, 7A:6, 8A:3, 9A:3	4T:31, 5T:14, 6T:6, 7T:1	4C:41, 5C:18, 6C:4, 7C:2, 8C:1, 9C:1	4G:11, 5G:6, 6G:1
Mollusca	Gastropoda	Cephalaspidea	Aglajidae	Odontoglaja	Odontoglaja guamensis	DQ991935.1	14129	4A:62, 5A:30, 6A:6, 7A:1, 8A:2	4T:121, 5T:64, 6T:24, 7T:9, 8T:2	4C:6, 5C:4	4G:17, 5G:9
Chordata	Actinopteri	Spariformes	Sparidae	Parargyrops	Parargyrops edita	NC_008616.1	16640	4A:69, 5A:24, 6A:5, 7A:1	4T:54, 5T:19, 6T:3, 10T:1	4C:75, 5C:45, 6C:12, 7C:1	4G:19, 5G:13
Chordata	Actinopteri	Cypriniformes	Catostomidae	Cycleptus	Cycleptus elongatus	AB126082.1	16626	4A:62, 5A:24, 6A:3, 7A:2	4T:56, 5T:14, 6T:1, 7T:3	4C:53, 5C:27, 6C:8, 7C:1	4G:20, 5G:7, 6G:2
Chordata	Actinopteri	Cypriniformes	Leuciscidae	Notemigonus	Notemigonus crysoleucas	AB127393.1	16583	4A:76, 5A:23, 6A:6	4T:56, 5T:11, 7T:1	4C:69, 5C:23, 6C:10	4G:27, 5G:6, 6G:1
Chordata	Actinopteri	Cypriniformes	Catostomidae	Catostomus	Catostomus commersonii	AB127394.1	16625	4A:59, 5A:15, 6A:7	4T:77, 5T:12, 6T:5, 7T:3	4C:66, 5C:25, 6C:8, 7C:1	4G:18, 5G:9, 6G:1
Chordata	Actinopteri	Cypriniformes	Tincidae	Tinca	Tinca tinca	AB218686.1	16612	4A:79, 5A:27, 6A:8, 7A:3	4T:65, 5T:17, 6T:4, 7T:1	4C:53, 5C:23, 6C:9	4G:19, 5G:8
Chordata	Actinopteri	Cypriniformes	Gobionidae	Gnathopogon	Gnathopogon elongatus	AB218687.1	16604	4A:75, 5A:21, 6A:6, 7A:4, 8A:1	4T:61, 5T:13, 6T:5, 7T:2	4C:64, 5C:19, 6C:9, 7C:3	4G:23, 5G:10, 6G:2, 7G:1
Chordata	Actinopteri	Cypriniformes	Danionidae	Esomus	Esomus metallicus	AB239594.1	17029	4A:87, 5A:25, 6A:6, 7A:3, 8A:1	4T:81, 5T:13, 6T:6, 8T:1	4C:56, 5C:10, 6C:5, 7C:1, 8C:1	4G:24, 5G:6, 6G:3, 7G:1
Chordata	Actinopteri	Cypriniformes	Cyprinidae	Gymnocypris	Gymnocypris przewalskii	AB239595.1	16682	4A:71, 5A:16, 6A:5	4T:56, 5T:14, 6T:10, 7T:2	4C:54, 5C:26, 6C:9	4G:26, 5G:10, 6G:5, 7G:1
Chordata	Actinopteri	Cypriniformes	Gobionidae	Gobio	Gobio gobio	AB239596.1	16607	4A:72, 5A:22, 6A:7, 7A:2	4T:57, 5T:20, 6T:4, 7T:2	4C:65, 5C:24, 6C:10	4G:32, 5G:10, 6G:2
Chordata	Actinopteri	Cypriniformes	Leuciscidae	Pelecus	Pelecus cultratus	AB239597.1	16610	4A:69, 5A:27, 6A:9, 7A:1	4T:57, 5T:13, 6T:1, 7T:1	4C:56, 5C:25, 6C:7	4G:21, 5G:8, 6G:2
Chordata	Actinopteri	Cypriniformes	Cobitidae	Acantopsis	Acantopsis choirorhynchos	AB242161.1	16600	4A:74, 5A:27, 6A:7, 7A:2	4T:58, 5T:13, 6T:2	4C:80, 5C:29, 6C:7	4G:16, 5G:7
Chordata	Actinopteri	Cypriniformes	Nemacheilidae	Barbatula	Barbatula toni	AB242162.1	16617	4A:56, 5A:19, 6A:3	4T:55, 5T:22, 6T:2, 8T:1	4C:78, 5C:28, 6C:9, 7C:3	4G:29, 5G:9, 6G:3
Chordata	Actinopteri	Cypriniformes	Botiidae	Chromobotia	Chromobotia macracanthus	AB242163.1	16937	4A:91, 5A:23, 6A:5, 7A:6	4T:47, 5T:10, 6T:4	4C:58, 5C:27, 6C:4	4G:8, 5G:8
Chordata	Actinopteri	Cypriniformes	Catostomidae	Minytrema	Minytrema melanops	AB242166.1	16627	4A:63, 5A:25, 6A:4, 7A:1	4T:64, 5T:14, 6T:3	4C:58, 5C:29, 6C:9	4G:16, 5G:7, 6G:1
Chordata	Actinopteri	Cypriniformes	Catostomidae	Hypentelium	Hypentelium nigricans	AB242169.1	16625	4A:71, 5A:19, 6A:3, 7A:2	4T:58, 5T:17, 6T:9, 7T:2	4C:73, 5C:19, 6C:5	4G:19, 5G:9, 6G:3
Chordata	Actinopteri	Cypriniformes	Vaillantellidae	Vaillantella	Vaillantella maassi	AB242173.1	17296	4A:82, 5A:34, 6A:7, 7A:2	4T:40, 5T:5, 6T:1	4C:58, 5C:28, 6C:3, 7C:1	4G:17, 5G:4, 6G:1
Nematoda	Enoplea	Mermithida	Mermithidae	Romanomermis	Romanomermis culicivorax	NC_008640.1	26194	4A:345, 5A:148, 6A:66, 7A:33, 8A:21, 9A:6, 10A:1, 11A:1, 13A:3	4T:279, 5T:99, 6T:49, 7T:15, 8T:12, 9T:1, 10T:3, 12T:1, 14T:1	4C:24, 5C:3, 6C:1	4G:17, 5G:7
Chordata	Mammalia	Artiodactyla	Cervidae	Elaphodus	Elaphodus cephalophus	NC_008749.1	16347	4A:83, 5A:39, 6A:10, 7A:5, 9A:1	4T:71, 5T:15, 6T:8	4C:49, 5C:14, 9C:1	4G:8, 5G:2, 6G:1
Arthropoda	Insecta	Diptera	Syrphidae	Simosyrphus	Simosyrphus grandicornis	NC_008754.1	16141	4A:137, 5A:72, 6A:30, 7A:11, 8A:3, 9A:2, 10A:3, 35A:1	4T:174, 5T:65, 6T:27, 7T:7, 8T:2, 9T:2, 10T:1, 12T:1, 19T:1	4C:7, 5C:3	4G:2
Arthropoda	Insecta	Diptera	Nemestrinidae	Trichophthalma	Trichophthalma punctata	NC_008755.1	16396	4A:153, 5A:54, 6A:27, 7A:15, 8A:6, 9A:3, 10A:4, 11A:2	4T:96, 5T:40, 6T:16, 7T:2, 8T:1	4C:23, 5C:15, 6C:2, 7C:3	4G:3, 5G:1
Arthropoda	Insecta	Diptera	Tabanidae	Cydistomyia	Cydistomyia duplonotata	NC_008756.1	16247	4A:129, 5A:55, 6A:30, 7A:4, 8A:2, 9A:1	4T:162, 5T:57, 6T:19, 7T:4, 8T:4, 9T:1, 19T:1	4C:15, 5C:6, 6C:2, 7C:1	4G:2, 5G:1
Nemertea	Palaeonemertea	Archinemertea	Cephalotrichidae	Cephalothrix	Cephalothrix rufifrons	EF140788.1	10135	4A:39, 5A:11, 6A:1, 7A:3	4T:139, 5T:72, 6T:47, 7T:23, 8T:15, 9T:9, 10T:4	4C:3, 5C:1	4G:18, 5G:9
Chordata	Lepidosauria	Squamata	Eublepharidae	Coleonyx	Coleonyx variegatus	AB114446.1	17110	4A:80, 5A:35, 6A:11, 7A:2	4T:36, 5T:19, 6T:4, 7T:2	4C:69, 5C:22, 6C:12, 7C:4	4G:18, 5G:2, 6G:1
Chordata	Lepidosauria	Squamata	Xantusiidae	Lepidophyma	Lepidophyma flavimaculatum	AB162908.1	16158	4A:77, 5A:34, 6A:16, 7A:2, 8A:1	4T:41, 5T:15, 6T:6, 7T:3, 8T:2	4C:64, 5C:39, 6C:9, 7C:1, 8C:1	4G:13, 5G:2
Chordata	Lepidosauria	Squamata	Amphisbaenidae	Geocalamus	Geocalamus acutus	AB162909.1	16682	4A:85, 5A:23, 6A:6, 7A:3, 8A:3	4T:63, 5T:25, 6T:15, 7T:3, 9T:1	4C:41, 5C:12, 6C:4, 7C:1, 8C:1, 9C:1	4G:13, 5G:3
Chordata	Lepidosauria	Squamata	Helodermatidae	Heloderma	Heloderma suspectum	AB167711.1	16846	4A:106, 5A:32, 6A:6, 7A:7, 8A:1	4T:64, 5T:23, 6T:7, 7T:5, 8T:3	4C:41, 5C:9, 6C:4, 7C:1	4G:11
Chordata	Lepidosauria	Squamata	Gekkonidae	Gekko	Gekko vittatus	AB178897.1	16946	4A:88, 5A:24, 6A:4, 7A:3, 8A:1	4T:64, 5T:22, 6T:16, 7T:2, 8T:1, 16T:1	4C:44, 5C:12, 6C:6	4G:13, 5G:10, 6G:1, 7G:1
Chordata	Lepidosauria	Squamata	Chamaeleonidae	Furcifer	Furcifer oustaleti	AB185326.1	18021	4A:106, 5A:56, 6A:23, 7A:8, 8A:9, 9A:2, 10A:1, 11A:1, 13A:1	4T:66, 5T:29, 6T:11, 7T:3, 8T:7, 9T:2	4C:37, 5C:16, 6C:4, 7C:1	4G:6, 5G:4, 6G:1
Mollusca	Bivalvia	Nuculida	Nuculidae	Nucula	Nucula nucleus	EF211991.1	13671	4A:86, 5A:28, 6A:9, 7A:3, 8A:1	4T:83, 5T:32, 6T:18, 7T:5	4C:31, 5C:12, 6C:3, 7C:2	4G:18, 5G:7, 6G:3, 7G:2
Chordata	Mammalia	Artiodactyla	Suidae	Phacochoerus	Phacochoerus africanus	NC_008830.1	16719	4A:91, 5A:48, 6A:10, 7A:2, 8A:1, 9A:1	4T:34, 5T:13, 6T:4	4C:41, 5C:14, 6C:4	4G:5, 5G:2
Chordata	Actinopteri	Gadiformes	Gadidae	Melanogrammus	Melanogrammus aeglefinus	AM489717.1	16584	4A:73, 5A:24, 6A:6, 7A:2	4T:93, 5T:33, 6T:9, 9T:1, 12T:1	4C:69, 5C:21, 6C:3, 7C:2, 10C:1	4G:18, 5G:9
Chordata	Actinopteri	Cichliformes	Cichlidae	Oreochromis	Oreochromis sp.	AP009126.1	16626	4A:72, 5A:27, 6A:7, 7A:1	4T:49, 5T:17, 6T:6, 11T:1	4C:77, 5C:52, 6C:12, 7C:3	4G:16, 5G:6, 6G:1
Chordata	Actinopteri	Cichliformes	Cichlidae	Astronotus	Astronotus ocellatus	AP009127.1	16569	4A:74, 5A:31, 6A:8, 7A:2	4T:54, 5T:17, 6T:3, 11T:1	4C:100, 5C:37, 6C:8, 7C:2	4G:11, 5G:5
Chordata	Actinopteri	Cichliformes	Cichlidae	Neolamprologus	Neolamprologus brichardi	AP006014.1	16587	4A:69, 5A:27, 6A:6, 7A:1	4T:58, 5T:15, 6T:4, 7T:2, 11T:1	4C:99, 5C:49, 6C:16, 7C:3, 8C:1, 10C:1	4G:23, 5G:6, 6G:4
Chordata	Actinopteri	Labriformes	Labridae	Halichoeres	Halichoeres melanurus	AP006018.1	17045	4A:67, 5A:24, 6A:7, 7A:2, 8A:1	4T:64, 5T:21, 6T:3, 7T:2	4C:76, 5C:24, 6C:8, 7C:3, 12C:1	4G:22, 5G:8, 6G:1
Chordata	Actinopteri	Labriformes	Labridae	Pseudolabrus	Pseudolabrus sieboldi	AP006019.1	16510	4A:52, 5A:14, 6A:5	4T:46, 5T:11, 6T:2, 8T:1	4C:83, 5C:29, 6C:4, 7C:3	4G:29, 5G:17
Mollusca	Bivalvia	Pectinida	Pectinidae	Mizuhopecten	Mizuhopecten yessoensis	AB271769.1	20414	4A:55, 5A:24, 6A:16, 7A:5, 8A:6, 9A:1	4T:155, 5T:74, 6T:29, 7T:18, 8T:6, 9T:1	4C:39, 5C:12, 6C:5, 8C:2	4G:110, 5G:55, 6G:27, 7G:4, 8G:2
Onychophora	Udeonychophora	Euonychophora	Peripatidae	Epiperipatus	Epiperipatus biolleyi	NC_009082.1	14411	4A:80, 5A:43, 6A:8, 7A:6, 8A:2, 9A:1	4T:146, 5T:69, 6T:41, 7T:15, 8T:8, 9T:5	4C:5, 5C:2, 6C:1	4G:24, 5G:6, 6G:1
Arthropoda	Arachnida	Mesostigmata	Phytoseiidae	Galendromus	Galendromus occidentalis	NC_009093.1	24961	4A:290, 5A:147, 6A:69, 7A:40, 8A:24, 9A:8, 10A:10, 11A:2, 12A:2	4T:209, 5T:85, 6T:29, 7T:13, 8T:9, 9T:5, 10T:2	4C:44, 5C:7, 6C:2	4G:9, 5G:2
Chordata	Aves	Psittaciformes	Psittaculidae	Melopsittacus	Melopsittacus undulatus	NC_009134.1	18193	4A:106, 5A:30, 6A:8, 7A:2, 8A:1	4T:41, 5T:22, 6T:2, 7T:2	4C:90, 5C:35, 6C:9, 7C:7, 8C:2	4G:9, 5G:1
Arthropoda	Insecta	Coleoptera	Rhagophthalmidae	Rhagophthalmus	Rhagophthalmus ohbai	AB267275.1	15704	4A:165, 5A:92, 6A:38, 7A:26, 8A:14, 9A:5, 10A:5, 13A:1, 17A:1, 18A:1, 62A:1	4T:132, 5T:51, 6T:26, 7T:4, 8T:4, 9T:2	4C:11, 5C:2, 6C:4	4G:1
Chordata	Actinopteri	Caproiformes	Caproidae	Capros	Capros aper	AP009159.1	15976	4A:72, 5A:25, 6A:4, 7A:1	4T:75, 5T:25, 6T:6, 7T:3, 8T:1	4C:80, 5C:35, 6C:6	4G:26, 5G:15, 6G:3
Chordata	Actinopteri	Acanthuriformes	Zanclidae	Zanclus	Zanclus cornutus	AP009162.1	16521	4A:58, 5A:20, 6A:1	4T:50, 5T:10, 6T:3	4C:82, 5C:43, 6C:13	4G:28, 5G:10, 6G:2
Chordata	Actinopteri	Acanthuriformes	Acanthuridae	Naso	Naso lopezi	AP009163.1	16542	4A:73, 5A:32, 6A:8, 7A:3	4T:52, 5T:6, 6T:3, 7T:1	4C:69, 5C:41, 6C:13, 7C:1, 8C:2, 9C:1	4G:21, 5G:7
Chordata	Actinopteri	Spariformes	Lethrinidae	Monotaxis	Monotaxis grandoculis	AP009166.1	16174	4A:61, 5A:20, 6A:4	4T:28, 5T:12, 6T:1	4C:75, 5C:40, 6C:13, 8C:1	4G:24, 5G:8, 6G:2
Chordata	Actinopteri	Lutjaniformes	Haemulidae	Parapristipoma	Parapristipoma trilineatum	AP009168.1	16546	4A:57, 5A:23, 6A:5, 7A:1	4T:50, 5T:19, 6T:2, 7T:1	4C:74, 5C:38, 6C:10	4G:21, 5G:10
Chordata	Actinopteri	Tetraodontiformes	Triodontidae	Triodon	Triodon macropterus	AP009170.1	16507	4A:64, 5A:20, 6A:6, 7A:1	4T:55, 5T:21, 6T:2, 8T:1	4C:96, 5C:51, 6C:12	4G:28, 5G:9, 6G:1
Chordata	Actinopteri	Tetraodontiformes	Triacanthodidae	Macrorhamphosodes	Macrorhamphosodes uradoi	AP009171.1	16497	4A:63, 5A:25, 6A:1, 7A:1	4T:51, 5T:11, 6T:5, 7T:1, 9T:1	4C:80, 5C:44, 6C:15	4G:27, 5G:13
Chordata	Actinopteri	Tetraodontiformes	Triacanthodidae	Triacanthodes	Triacanthodes anomalus	AP009172.1	16497	4A:58, 5A:28, 6A:3, 7A:1	4T:61, 5T:13, 6T:8, 7T:1	4C:73, 5C:56, 6C:8	4G:26, 5G:12, 6G:1
Chordata	Actinopteri	Tetraodontiformes	Triacanthidae	Trixiphichthys	Trixiphichthys weberi	AP009173.1	16332	4A:66, 5A:33, 6A:6, 7A:1, 8A:2	4T:45, 5T:17, 6T:3	4C:76, 5C:44, 6C:11, 7C:4	4G:22, 5G:9, 6G:1
Chordata	Actinopteri	Tetraodontiformes	Triacanthidae	Triacanthus	Triacanthus biaculeatus	AP009174.1	16565	4A:59, 5A:29, 6A:3, 7A:1	4T:52, 5T:20, 6T:2, 7T:1	4C:76, 5C:31, 6C:15	4G:30, 5G:11, 6G:3
Chordata	Actinopteri	Tetraodontiformes	Aracanidae	Kentrocapros	Kentrocapros aculeatus	AP009175.1	16485	4A:62, 5A:18, 6A:7, 7A:1, 8A:1	4T:50, 5T:21, 6T:2, 7T:2, 10T:1	4C:84, 5C:26, 6C:10	4G:25, 5G:15
Chordata	Actinopteri	Tetraodontiformes	Ostraciidae	Ostracion	Ostracion immaculatus	AP009176.1	16502	4A:73, 5A:21, 6A:8, 7A:2	4T:60, 5T:11, 6T:5, 7T:1	4C:67, 5C:35, 6C:11, 12C:1	4G:21, 5G:9, 6G:1
Chordata	Actinopteri	Tetraodontiformes	Diodontidae	Diodon	Diodon holocanthus	AP009177.1	16514	4A:68, 5A:23, 6A:7, 8A:1	4T:40, 5T:8, 6T:3, 10T:1	4C:74, 5C:46, 6C:14	4G:16, 5G:10
Chordata	Actinopteri	Acropomatiformes	Acropomatidae	Doederleinia	Doederleinia berycoides	AP009181.1	16523	4A:58, 5A:23, 6A:3, 7A:1	4T:39, 5T:15, 6T:5	4C:82, 5C:44, 6C:15	4G:20, 5G:12
Chordata	Lepidosauria	Squamata	Agamidae	Chlamydosaurus	Chlamydosaurus kingii	NC_009421.1	16761	4A:83, 5A:38, 6A:13, 7A:5, 9A:1	4T:37, 5T:10, 6T:3, 7T:3	4C:62, 5C:10, 6C:7, 7C:6, 8C:1	4G:10, 5G:1
Porifera	Hexactinellida	Hexactinosida	Dactylocalycidae	Iphiteon	Iphiteon panicea	EF537576.1	19046	4A:193, 5A:72, 6A:42, 7A:21, 8A:14, 9A:6, 13A:1	4T:23, 5T:6, 6T:6	4C:31, 5C:8, 6C:2, 7C:1	4G:3, 5G:2
Porifera	Hexactinellida	Lyssacinosida	Rossellidae	Sympagella	Sympagella nux	EF537577.1	16293	4A:156, 5A:58, 6A:32, 7A:7, 8A:4, 9A:1	4T:70, 5T:30, 6T:11, 7T:2, 8T:1	4C:25, 5C:10, 6C:3, 7C:1	4G:9, 5G:2
Platyhelminthes	Cestoda	Diphyllobothriidea	Diphyllobothriidae	Dibothriocephalus	Dibothriocephalus nihonkaiensis	AB268585.1	13747	4A:23, 5A:7, 6A:1, 7A:1	4T:193, 5T:61, 6T:42, 7T:14, 8T:7, 9T:1, 10T:1	4C:11, 5C:1, 6C:1	4G:24, 5G:11, 6G:2
Chordata	Actinopteri	Spariformes	Sparidae	Pagellus	Pagellus bogaraveo	AB305023.1	16941	4A:66, 5A:29, 6A:1	4T:58, 5T:24, 6T:2, 7T:3	4C:90, 5C:37, 6C:12, 10C:1, 14C:1	4G:24, 5G:14
Chordata	Actinopteri	Clupeiformes	Clupeidae	Alosa	Alosa pseudoharengus	AP009132.1	16646	4A:52, 5A:25, 6A:4, 7A:1	4T:39, 5T:5, 6T:1, 7T:1	4C:72, 5C:38, 6C:13	4G:27, 5G:11, 6G:5
Chordata	Actinopteri	Clupeiformes	Clupeidae	Clupea	Clupea pallasii	AP009134.1	16700	4A:52, 5A:15, 6A:7	4T:41, 5T:6, 6T:3, 7T:1	4C:85, 5C:39, 6C:8, 7C:3	4G:36, 5G:14, 6G:3
Chordata	Actinopteri	Clupeiformes	Clupeidae	Dorosoma	Dorosoma petenense	AP009136.1	16792	4A:76, 5A:29, 6A:5, 7A:1	4T:55, 5T:16, 6T:2, 10T:1	4C:86, 5C:39, 6C:13, 8C:1	4G:24, 5G:12, 6G:3
Chordata	Actinopteri	Clupeiformes	Clupeidae	Ethmalosa	Ethmalosa fimbriata	AP009138.1	16898	4A:63, 5A:23, 6A:4, 7A:1	4T:42, 5T:5, 6T:1	4C:69, 5C:31, 6C:9	4G:21, 5G:7, 6G:3
Chordata	Actinopteri	Clupeiformes	Dussumieriidae	Etrumeus	Etrumeus micropus	AP009139.1	16979	4A:58, 5A:17, 6A:8	4T:65, 5T:19, 6T:4	4C:78, 5C:30, 6C:17, 7C:1	4G:29, 5G:16, 6G:3
Chordata	Actinopteri	Clupeiformes	Clupeidae	Nematalosa	Nematalosa japonica	AP009142.1	16655	4A:50, 5A:17, 6A:2, 8A:1	4T:47, 5T:8, 6T:1, 7T:1, 10T:1	4C:86, 5C:32, 6C:5, 7C:1	4G:37, 5G:12, 6G:3
Chordata	Actinopteri	Clupeiformes	Clupeidae	Spratelloides	Spratelloides gracilis	AP009145.1	16686	4A:44, 5A:11, 6A:1	4T:61, 5T:14, 6T:4, 7T:2, 8T:1	4C:85, 5C:34, 6C:9, 7C:2	4G:27, 5G:10, 6G:2
Chordata	Actinopteri	Clupeiformes	Clupeidae	Pellonula	Pellonula vorax	AP009231.1	16733	4A:70, 5A:25, 6A:6, 7A:2	4T:41, 5T:12, 6T:4	4C:80, 5C:48, 6C:10	4G:18, 5G:8, 6G:1, 7G:1
Chordata	Actinopteri	Clupeiformes	Clupeidae	Sardina	Sardina pilchardus	AP009233.1	16822	4A:39, 5A:12, 6A:3, 7A:1	4T:60, 5T:21, 6T:6, 16T:1	4C:82, 5C:41, 6C:11	4G:49, 5G:19, 6G:7
Annelida	Clitellata	Crassiclitellata	Megascolecidae	Perionyx	Perionyx excavatus	NC_009631.1	15083	4A:72, 5A:34, 6A:7, 7A:1, 8A:2	4T:73, 5T:18, 6T:11, 7T:2, 11T:1	4C:16, 5C:6	4G:14, 5G:3, 7G:1
Chordata	Lepidosauria	Squamata	Agamidae	Calotes	Calotes versicolor	AB183287.1	16670	4A:93, 5A:67, 6A:16, 7A:5, 8A:5	4T:61, 5T:33, 6T:9, 7T:6, 8T:2, 9T:1	4C:45, 5C:18, 6C:9, 7C:2, 8C:1, 10C:1	4G:16, 5G:10, 6G:2
Mollusca	Cephalopoda	Vampyromorpha	Vampyroteuthidae	Vampyroteuthis	Vampyroteuthis infernalis	AB266515.1	15617	4A:141, 5A:50, 6A:17, 7A:18, 8A:10, 9A:1, 10A:3, 11A:2, 12A:1, 15A:1	4T:147, 5T:45, 6T:18, 7T:8, 8T:4, 9T:2, 10T:2	4C:15, 5C:13	4G:1, 5G:1
Chordata	Mammalia	Carnivora	Mustelidae	Enhydra	Enhydra lutris	AB291077.1	16431	4A:76, 5A:38, 6A:10, 7A:1, 8A:1	4T:27, 5T:13, 6T:2	4C:60, 5C:10, 6C:6, 13C:1	4G:9, 5G:5, 8G:1
Chordata	Actinopteri	Pleuronectiformes	Pleuronectidae	Hippoglossus	Hippoglossus stenolepis	AM749129.1	17902	4A:60, 5A:22, 6A:6, 7A:1	4T:88, 5T:14, 6T:2, 7T:2, 11T:1	4C:120, 5C:28, 6C:15, 7C:1	4G:27, 5G:11, 6G:4
Chordata	Actinopteri	Pleuronectiformes	Pleuronectidae	Reinhardtius	Reinhardtius hippoglossoides	AM749133.1	18078	4A:77, 5A:27, 6A:9, 7A:1	4T:89, 5T:18, 6T:7, 7T:1, 11T:1	4C:100, 5C:37, 6C:13	4G:22, 5G:14, 6G:3
Arthropoda	Insecta	Diptera	Calliphoridae	Lucilia	Lucilia sericata	AJ422212.1	15945	4A:119, 5A:69, 6A:24, 7A:11, 8A:6, 9A:5, 10A:1, 21A:1	4T:166, 5T:54, 6T:23, 7T:2, 8T:3, 9T:1, 22T:1	4C:10, 5C:6	4G:1
Arthropoda	Insecta	Diptera	Calliphoridae	Chrysomya	Chrysomya megacephala	AJ426041.2	15831	4A:119, 5A:64, 6A:23, 7A:11, 8A:6, 9A:1, 10A:1, 22A:1	4T:137, 5T:49, 6T:12, 7T:2, 8T:3, 20T:1	4C:8, 5C:4, 6C:2	4G:1
Chordata	Actinopteri	Perciformes	Aulorhynchidae	Aulorhynchus	Aulorhynchus flavidus	AP009196.1	16894	4A:73, 5A:34, 6A:9, 7A:5, 8A:1, 10A:1	4T:77, 5T:33, 6T:14, 7T:2, 20T:1	4C:50, 5C:34, 6C:10, 7C:2, 8C:1, 11C:1	4G:14, 5G:9
Chordata	Actinopteri	Syngnathiformes	Pegasidae	Eurypegasus	Eurypegasus draconis	AP005983.1	16015	4A:69, 5A:18, 6A:2, 7A:2	4T:54, 5T:18, 6T:6, 7T:1	4C:51, 5C:20, 6C:6	4G:25, 5G:5, 7G:1
Chordata	Actinopteri	Syngnathiformes	Pegasidae	Pegasus	Pegasus volitans	AP005984.1	16514	4A:64, 5A:26, 6A:4, 7A:1	4T:53, 5T:18, 6T:7, 7T:1	4C:68, 5C:30, 6C:13	4G:16, 5G:6, 6G:1
Chordata	Actinopteri	Syngnathiformes	Centriscidae	Macroramphosus	Macroramphosus scolopax	AP005988.1	16016	4A:58, 5A:22, 6A:3, 7A:2	4T:43, 5T:11	4C:74, 5C:50, 6C:8	4G:22, 5G:16, 6G:1
Chordata	Mammalia	Carnivora	Mephitidae	Spilogale	Spilogale putorius	AM711898.1	16597	4A:82, 5A:37, 6A:8, 7A:6, 8A:2	4T:58, 5T:11, 6T:9, 7T:1	4C:34, 5C:13, 6C:3	4G:10, 5G:1, 10G:1
Arthropoda	Insecta	Diptera	Ceratopogonidae	Culicoides	Culicoides cylindratus	AB361007.1	10428	4A:100, 5A:32, 6A:16, 7A:7, 8A:4, 9A:1, 10A:1	4T:128, 5T:68, 6T:22, 7T:17, 8T:7, 9T:4, 10T:3	4C:25, 5C:13, 6C:1	4G:3, 5G:2
Chordata	Ascidiacea	Stolidobranchia	Pyuridae	Microcosmus	Microcosmus sulcatus	AM292321.1	15028	4A:53, 5A:27, 6A:5, 7A:4	4T:172, 5T:101, 6T:41, 7T:14, 8T:8, 9T:2, 11T:3, 17T:1	4C:2, 5C:1	4G:49, 5G:12, 6G:4, 7G:1
Chordata	Ascidiacea	Phlebobranchia	Ascidiidae	Phallusia	Phallusia fumigata	AM292602.1	15535	4A:19, 5A:5, 6A:1, 8A:1	4T:85, 5T:37, 6T:15, 7T:3, 8T:1, 9T:2	4C:24, 5C:6, 7C:2	4G:111, 5G:56, 6G:31, 7G:11, 8G:7, 9G:3, 10G:3
Chordata	Actinopteri	Centrarchiformes	Sinipercidae	Coreoperca	Coreoperca kawamebari	AP005990.1	16488	4A:59, 5A:22, 6A:6, 7A:1	4T:54, 5T:29, 6T:6	4C:74, 5C:47, 6C:13, 7C:3	4G:20, 5G:8, 6G:2, 7G:2
Chordata	Actinopteri	Lutjaniformes	Lutjanidae	Lutjanus	Lutjanus rivulatus	AP006000.1	16511	4A:70, 5A:21, 6A:3, 7A:1	4T:27, 5T:13, 6T:3	4C:78, 5C:56, 6C:11	4G:19, 5G:8, 6G:1
Chordata	Actinopteri	Chaetodontiformes	Chaetodontidae	Chaetodon	Chaetodon auripes	AP006004.1	16530	4A:57, 5A:30, 6A:4, 7A:3	4T:41, 5T:16, 6T:5	4C:73, 5C:43, 6C:9, 7C:3, 11C:1	4G:21, 5G:10
Chordata	Actinopteri	Chaetodontiformes	Chaetodontidae	Heniochus	Heniochus diphreutes	AP006005.1	16772	4A:72, 5A:32, 6A:7, 7A:4	4T:37, 5T:15, 6T:3	4C:74, 5C:43, 6C:10, 7C:3	4G:17, 5G:13, 6G:1
Chordata	Actinopteri	Acanthuriformes	Acanthuridae	Zebrasoma	Zebrasoma flavescens	AP006032.1	16503	4A:61, 5A:32, 6A:1, 7A:2, 8A:1	4T:34, 5T:11, 11T:1	4C:77, 5C:32, 6C:8	4G:18, 5G:8
Chordata	Amphibia	Anura	Bufonidae	Bufo	Bufo japonicus	AB303363.1	17757	4A:69, 5A:31, 6A:7, 7A:2	4T:66, 5T:35, 6T:10, 7T:4, 8T:1	4C:70, 5C:33, 6C:11, 7C:2, 8C:4, 9C:3	4G:22, 5G:11, 7G:1
Echinodermata	Echinoidea	Camarodonta	Strongylocentrotidae	Strongylocentrotus	Strongylocentrotus pallidus	AM900392.1	15712	4A:84, 5A:27, 6A:10, 7A:3, 8A:1	4T:83, 5T:35, 6T:18, 7T:4, 8T:3	4C:40, 5C:9, 6C:7	4G:32, 5G:6, 6G:1, 20G:1
Annelida	Polychaeta	Terebellida	Ampharetidae	Eclysippe	Eclysippe vanelli	EU239687.1	13749	4A:58, 5A:33, 6A:4, 7A:2, 9A:1, 10A:1	4T:204, 5T:78, 6T:30, 7T:16, 8T:8, 9T:5, 10T:4, 13T:1	4C:6	4G:34, 5G:7, 6G:4
Chordata	Actinopteri	Stylephoriformes	Stylephoridae	Stylephorus	Stylephorus chordatus	AB280688.1	15888	4A:71, 5A:23, 6A:5, 7A:1	4T:48, 5T:11	4C:80, 5C:53, 6C:8, 12C:1	4G:14, 5G:5, 6G:1
Annelida	Polychaeta	Terebellida	Terebellidae	Pista	Pista cristata	EU239688.1	15894	4A:64, 5A:32, 6A:10, 7A:2, 8A:1	4T:196, 5T:76, 6T:33, 7T:16, 8T:6, 9T:3, 10T:3	4C:18, 5C:9, 6C:2	4G:10, 5G:2
Arthropoda	Insecta	Coleoptera	Elateridae	Pyrophorus	Pyrophorus divergens	NC_009964.1	16120	4A:138, 5A:78, 6A:36, 7A:16, 8A:9, 9A:2, 10A:1, 17A:1	4T:81, 5T:31, 6T:3, 7T:3, 12T:1	4C:31, 5C:10, 6C:3, 7C:2	4G:1
Arthropoda	Insecta	Orthoptera	Tettigoniidae	Anabrus	Anabrus simplex	NC_009967.1	15766	4A:110, 5A:49, 6A:20, 7A:7, 8A:3, 9A:2, 10A:1	4T:95, 5T:30, 6T:7, 7T:2, 20T:1	4C:29, 5C:11, 6C:2	4G:7, 5G:7, 7G:1
Arthropoda	Insecta	Hymenoptera	Vespidae	Abispa	Abispa ephippium	EU302588.1	16953	4A:135, 5A:61, 6A:27, 7A:17, 8A:4, 10A:1, 11A:1, 12A:1, 23A:1	4T:179, 5T:69, 6T:34, 7T:8, 8T:8, 9T:3	4C:12, 5C:4, 6C:3
Chordata	Aves	Eurypygiformes	Rhynochetidae	Rhynochetos	Rhynochetos jubatus	NC_010091.1	16937	4A:88, 5A:24, 6A:4, 7A:3, 8A:1	4T:34, 5T:4, 6T:3, 8T:1, 9T:1	4C:74, 5C:31, 6C:9, 7C:2, 8C:1	4G:20, 5G:3
Chordata	Aves	Apodiformes	Trochilidae	Archilochus	Archilochus colubris	NC_010094.1	16356	4A:87, 5A:34, 6A:9, 7A:3	4T:22, 5T:5, 6T:2, 10T:1	4C:69, 5C:27, 6C:16, 7C:2, 8C:1	4G:12, 5G:1, 6G:2
Chordata	Aves	Podicipediformes	Podicipedidae	Tachybaptus	Tachybaptus novaehollandiae	NC_010095.1	18002	4A:86, 5A:27, 6A:8, 7A:4	4T:23, 5T:10, 6T:1	4C:78, 5C:31, 6C:10, 7C:2, 8C:1, 11C:1	4G:2, 5G:7, 6G:1
Chordata	Actinopteri	Gadiformes	Gadidae	Boreogadus	Boreogadus saida	AM919428.1	16745	4A:71, 5A:21, 6A:4, 7A:1	4T:76, 5T:26, 6T:5, 8T:1, 11T:1, 12T:1	4C:86, 5C:20, 6C:4, 7C:1, 14C:1	4G:20, 5G:11
Chordata	Actinopteri	Gadiformes	Gadidae	Arctogadus	Arctogadus glacialis	AM919429.1	16644	4A:70, 5A:25, 6A:3, 7A:2	4T:78, 5T:26, 6T:6, 8T:1, 9T:1, 11T:1, 14T:1	4C:65, 5C:25, 6C:8, 7C:1	4G:22, 5G:11
Porifera	Demospongiae	Poecilosclerida	Latrunculiidae	Negombata	Negombata magnifica	AM420314.1	20088	4A:109, 5A:31, 6A:8, 7A:3, 9A:1	4T:205, 5T:65, 6T:24, 7T:15, 8T:9, 9T:1, 10T:1, 11T:1	4C:12, 5C:2, 6C:2	4G:99, 5G:42, 6G:7, 7G:3, 8G:2, 9G:1
Chordata	Lepidosauria	Squamata	Viperidae	Deinagkistrodon	Deinagkistrodon acutus	NC_010223.1	17548	4A:91, 5A:28, 6A:14, 7A:7, 8A:3, 10A:2	4T:39, 5T:19, 6T:3, 7T:4	4C:61, 5C:25, 6C:5, 7C:6, 8C:7, 9C:1	4G:13, 5G:6, 6G:2
Porifera	Demospongiae	Haplosclerida	Niphatidae	Amphimedon	Amphimedon compressa	NC_010201.1	18564	4A:82, 5A:17, 6A:9, 8A:1	4T:120, 5T:47, 6T:16, 7T:5, 8T:6	4C:43, 5C:10, 6C:3	4G:93, 5G:29, 6G:10, 7G:2, 8G:1
Porifera	Demospongiae	Haplosclerida	Callyspongiidae	Callyspongia	Callyspongia plicifera	NC_010206.1	18846	4A:80, 5A:18, 6A:3, 7A:4	4T:156, 5T:57, 6T:20, 7T:18, 8T:8, 11T:1	4C:11, 5C:6, 7C:1	4G:93, 5G:31, 6G:8, 7G:1, 8G:1
Porifera	Demospongiae	Suberitida	Halichondriidae	Topsentia	Topsentia ophiraphidites	NC_010204.1	19763	4A:110, 5A:33, 6A:6, 7A:4, 8A:1, 9A:1	4T:162, 5T:68, 6T:16, 7T:13, 8T:5, 11T:1	4C:18, 7C:2	4G:67, 5G:17, 6G:5, 7G:1
Porifera	Demospongiae	Poecilosclerida	Iotrochotidae	Iotrochota	Iotrochota birotulata	NC_010207.1	19112	4A:75, 5A:31, 6A:7, 7A:5, 8A:2, 9A:1	4T:151, 5T:53, 6T:22, 7T:11, 8T:7, 9T:2, 11T:1	4C:16, 5C:4	4G:111, 5G:44, 6G:8, 7G:4
Arthropoda	Diplopoda	Julida	Nemasomatidae	Antrokoreana	Antrokoreana gracilipes	NC_010221.1	14747	4A:70, 5A:30, 6A:7, 7A:4, 8A:1	4T:103, 5T:42, 6T:21, 7T:5, 8T:3, 11T:1	4C:39, 5C:15, 6C:1	4G:32, 5G:9, 6G:1
Porifera	Demospongiae	Tetractinellida	Tetillidae	Cinachyrella	Cinachyrella kuekenthali	NC_010198.1	18089	4A:84, 5A:18, 6A:8, 7A:1, 8A:1	4T:129, 5T:41, 6T:21, 7T:16, 8T:8, 9T:1, 11T:1	4C:12, 5C:7, 6C:1	4G:71, 5G:30, 6G:3, 7G:2
Porifera	Demospongiae	Axinellida	Raspailiidae	Ectyoplasia	Ectyoplasia ferox	NC_010210.1	18312	4A:102, 5A:30, 6A:9, 7A:5, 8A:2	4T:174, 5T:69, 6T:22, 7T:18, 8T:5, 9T:1	4C:10, 5C:1	4G:52, 5G:13, 6G:5, 7G:1
Porifera	Demospongiae	Dictyoceratida	Spongiidae	Hippospongia	Hippospongia lachne	NC_010215.1	16755	4A:72, 5A:22, 6A:12, 7A:1, 8A:1	4T:150, 5T:66, 6T:24, 7T:21, 8T:7, 9T:5, 13T:1	4C:21, 5C:5, 6C:1	4G:97, 5G:67, 6G:25, 7G:8, 8G:3
Porifera	Demospongiae	Axinellida	Axinellidae	Ptilocaulis	Ptilocaulis walpersi	NC_010209.1	18865	4A:103, 5A:35, 6A:9, 7A:5, 8A:1, 9A:2, 10A:2	4T:197, 5T:78, 6T:29, 7T:16, 8T:10, 9T:3, 10T:1, 13T:1	4C:12, 5C:4, 6C:1	4G:38, 5G:14, 6G:3, 7G:1
Porifera	Demospongiae	Dendroceratida	Dictyodendrillidae	Igernella	Igernella notabilis	NC_010216.1	20310	4A:160, 5A:78, 6A:23, 7A:26, 8A:2, 9A:1	4T:176, 5T:99, 6T:28, 7T:31, 8T:8, 9T:3, 10T:1	4C:16, 5C:5, 6C:1	4G:57, 5G:33, 6G:15, 7G:3, 8G:1, 9G:1
Chordata	Amphibia	Anura	Microhylidae	Microhyla	Microhyla okinavensis	AB303950.1	16717	4A:67, 5A:30, 6A:10, 7A:4	4T:118, 5T:37, 6T:18, 7T:12, 8T:3, 10T:1	4C:64, 5C:25, 6C:10, 7C:4	4G:17, 5G:10, 6G:2, 8G:1
Chordata	Lepidosauria	Squamata	Gekkonidae	Heteronotia	Heteronotia binoei	NC_010292.1	25972	4A:172, 5A:66, 6A:10, 7A:9, 8A:1	4T:45, 5T:20, 6T:12	4C:134, 5C:39, 6C:15, 7C:9, 8C:2	4G:32, 5G:5
Chordata	Actinopteri	Labriformes	Labridae	Pteragogus	Pteragogus flagellifer	NC_010205.2	16793	4A:61, 5A:18, 6A:3, 7A:1	4T:60, 5T:16, 6T:8, 7T:2	4C:86, 5C:46, 6C:6, 7C:7	4G:22, 5G:14
Chordata	Mammalia	Hyracoidea	Procaviidae	Dendrohyrax	Dendrohyrax dorsalis	AM904727.1	16590	4A:76, 5A:39, 6A:11, 7A:4, 8A:2, 9A:1	4T:36, 5T:6, 6T:3, 7T:1	4C:54, 5C:18, 6C:6, 7C:1, 8C:1	4G:12, 5G:7, 6G:1
Chordata	Mammalia	Sirenia	Trichechidae	Trichechus	Trichechus manatus	AM904728.1	16882	4A:56, 5A:27, 6A:6, 7A:1, 8A:1	4T:31, 5T:12, 6T:1, 7T:1	4C:58, 5C:14, 6C:3	4G:12, 5G:3
Chordata	Mammalia	Eulipotyphla	Erinaceidae	Hylomys	Hylomys suillus	AM905042.1	15353	4A:80, 5A:31, 6A:7, 7A:3, 8A:2, 10A:1	4T:92, 5T:31, 6T:13, 7T:5, 8T:1	4C:33, 5C:17, 6C:3	4G:4, 5G:1
Arthropoda	Malacostraca	Decapoda	Munidopsidae	Shinkaia	Shinkaia crosnieri	EU420129.1	15182	4A:142, 5A:45, 6A:18, 7A:12, 8A:6, 9A:2, 10A:2, 11A:2	4T:170, 5T:65, 6T:31, 7T:8, 8T:9, 9T:4	4C:34, 5C:14, 6C:7, 7C:1	4G:2, 5G:1
Arthropoda	Arachnida	Amblypygi	Phrynidae	Phrynus	Phrynus sp.	EU520641.1	14764	4A:109, 5A:34, 6A:10, 7A:10, 9A:2	4T:107, 5T:46, 6T:15, 7T:6, 8T:3, 9T:1	4C:56, 5C:34, 6C:5, 7C:4	4G:9, 5G:2
Arthropoda	Arachnida	Uropygi	Thelyphonidae	Mastigoproctus	Mastigoproctus giganteus	EU520643.1	14416	4A:132, 5A:61, 6A:26, 7A:10, 8A:3	4T:134, 5T:63, 6T:23, 7T:10, 8T:1, 9T:1	4C:35, 5C:18, 6C:3, 7C:1	4G:12, 5G:2
Arthropoda	Arachnida	Araneae	Nemesiidae	Calisoga	Calisoga longitarsis	EU523754.1	14070	4A:75, 5A:26, 6A:8, 7A:2, 8A:1	4T:132, 5T:62, 6T:19, 7T:10, 8T:6, 9T:3, 10T:2, 20T:1	4C:6, 5C:5, 6C:2	4G:60, 5G:18, 6G:7, 7G:4, 8G:2, 9G:2
Rotifera	Eurotatoria	Ploima	Brachionidae	Brachionus	Brachionus plicatilis	AP009408.1	12672	4A:45, 5A:9, 6A:2, 7A:1	4T:78, 5T:28, 6T:6, 7T:2, 8T:1	4C:26, 5C:14, 6C:11, 7C:1, 8C:3, 11C:2	4G:13, 6G:1
Porifera	Demospongiae	Suberitida	Suberitidae	Suberites	Suberites domuncula	AM690374.1	26300	4A:150, 5A:59, 6A:16, 7A:5, 8A:4	4T:224, 5T:75, 6T:29, 7T:15, 8T:4	4C:35, 5C:9	4G:100, 5G:37, 6G:3, 7G:2, 8G:1
Chordata	Lepidosauria	Squamata	Elapidae	Bungarus	Bungarus multicinctus	EU579522.1	17144	4A:76, 5A:28, 6A:5, 7A:10, 8A:1, 9A:1	4T:51, 5T:17, 6T:8, 7T:7, 9T:1	4C:56, 5C:16, 6C:2, 8C:2, 9C:1, 11C:1	4G:15, 5G:2, 6G:1
Arthropoda	Insecta	Lepidoptera	Geometridae	Phthonandria	Phthonandria atrilineata	NC_010522.1	15499	4A:148, 5A:61, 6A:32, 7A:9, 8A:1, 9A:1, 10A:2, 11A:2, 12A:1	4T:162, 5T:67, 6T:25, 7T:16, 8T:9, 9T:3, 10T:2, 11T:1, 18T:1	4C:16, 5C:7, 6C:3	4G:7, 5G:1, 6G:1
Chordata	Aves	Galliformes	Phasianidae	Syrmaticus	Syrmaticus humiae	AB164625.1	16686	4A:71, 5A:36, 6A:6, 7A:6	4T:33, 5T:11, 6T:8, 11T:1	4C:71, 5C:27, 6C:11, 7C:4, 8C:2, 12C:1	4G:10, 5G:4, 7G:1
Chordata	Aves	Galliformes	Phasianidae	Lophura	Lophura ignita	AB164627.1	16688	4A:77, 5A:34, 6A:6, 7A:4, 8A:1	4T:40, 5T:9, 6T:3, 7T:2	4C:64, 5C:40, 6C:11, 7C:2, 8C:1, 12C:1	4G:10, 5G:4, 7G:1
Arthropoda	Arachnida	Trombidiformes	Trombiculidae	Walchia	Walchia hayashii	AB300500.1	14857	4A:213, 5A:88, 6A:69, 7A:33, 8A:29, 9A:8, 10A:5, 11A:1	4T:74, 5T:15, 6T:10, 7T:4	4C:15, 5C:7, 6C:1, 7C:1, 10C:1	4G:2, 5G:2
Arthropoda	Arachnida	Trombidiformes	Trombiculidae	Ascoschoengastia	Ascoschoengastia sp.	AB300501.1	16067	4A:132, 5A:36, 6A:13, 7A:1, 8A:1, 9A:1	4T:137, 5T:47, 6T:14, 8T:1, 9T:1	4C:37, 5C:10, 6C:3, 7C:1	4G:31, 5G:16
Echinodermata	Ophiuroidea	Amphilepidida	Ophiuridae	Ophiura	Ophiura albida	AM404180.1	16580	4A:119, 5A:57, 6A:20, 7A:6, 8A:1, 9A:1, 10A:1	4T:151, 5T:73, 6T:32, 7T:16, 8T:2, 9T:1	4C:22, 5C:3, 6C:1	4G:17, 5G:9, 9G:1
Chordata	Amphibia	Anura	Mantellidae	Aglyptodactylus	Aglyptodactylus madagascariensis	AB325874.1	10674	4A:76, 5A:13, 6A:1, 7A:1	4T:48, 5T:9, 6T:10, 7T:1	4C:52, 5C:14, 6C:4, 7C:2, 9C:2	4G:7, 5G:7
Chordata	Amphibia	Anura	Mantellidae	Laliostoma	Laliostoma labrosum	AB325875.1	10497	4A:45, 5A:16, 6A:4, 7A:3, 8A:1	4T:44, 5T:12, 6T:5, 7T:4, 9T:1	4C:41, 5C:15, 6C:5, 7C:2, 8C:1, 11C:1	4G:12, 5G:2, 6G:2
Chordata	Amphibia	Anura	Mantellidae	Guibemantis	Guibemantis tornieri	AB325882.1	14603	4A:62, 5A:23, 6A:6, 7A:3	4T:72, 5T:23, 6T:7, 7T:8, 8T:1, 9T:3	4C:44, 5C:20, 6C:2, 7C:1, 8C:9	4G:11, 5G:5
Chordata	Amphibia	Anura	Mantellidae	Wakea	Wakea madinika	AB325887.1	15832	4A:97, 5A:26, 6A:9, 7A:3	4T:96, 5T:35, 6T:5, 7T:4, 8T:2	4C:41, 5C:7, 6C:10, 7C:2, 8C:7, 9C:3	4G:8, 5G:1, 7G:3, 8G:1, 9G:1
Arthropoda	Arachnida	Scorpiones	Buthidae	Buthus	Buthus occitanus	NC_010765.1	15060	4A:128, 5A:39, 6A:13, 7A:11, 8A:5, 9A:2	4T:190, 5T:70, 6T:37, 7T:27, 8T:6, 9T:6, 10T:3	4C:15, 5C:3, 7C:1	4G:39, 5G:9, 6G:4, 7G:2
Arthropoda	Arachnida	Opiliones	Phalangiidae	Phalangium	Phalangium opilio	NC_010766.1	14968	4A:140, 5A:71, 6A:26, 7A:18, 8A:7, 9A:6, 10A:2, 20A:1	4T:121, 5T:49, 6T:18, 7T:7, 9T:1, 10T:1	4C:38, 5C:14, 6C:5, 7C:1	4G:7, 5G:9, 6G:3
Arthropoda	Arachnida	Scorpiones	Chactidae	Uroctonus	Uroctonus mordax	NC_010782.1	14840	4A:118, 5A:51, 6A:12, 7A:7, 9A:1	4T:197, 5T:77, 6T:29, 7T:14, 8T:3, 9T:3	4C:7, 5C:3, 10C:1	4G:12, 5G:6, 6G:2, 8G:1
Chordata	Lepidosauria	Squamata	Dipsadidae	Pseudoleptodeira	Pseudoleptodeira latifasciata	EU728579.1	18329	4A:100, 5A:47, 6A:17, 7A:6, 8A:4, 9A:1	4T:63, 5T:28, 6T:13, 7T:2	4C:30, 5C:17, 6C:1, 8C:2, 9C:6	4G:17, 5G:3, 6G:2
Chordata	Lepidosauria	Squamata	Dipsadidae	Sibon	Sibon nebulatus	EU728583.1	22887	4A:78, 5A:30, 6A:11, 7A:8, 8A:6, 9A:2	4T:40, 5T:25, 6T:1, 7T:3	4C:71, 5C:46, 6C:21, 7C:5, 8C:1, 9C:1, 10C:1, 14C:1	4G:17, 5G:2, 6G:2, 7G:1
Chordata	Lepidosauria	Squamata	Dipsadidae	Imantodes	Imantodes cenchoa	EU728586.1	22144	4A:174, 5A:38, 6A:17, 7A:7, 8A:1, 9A:2	4T:104, 5T:32, 6T:1	4C:49, 5C:21, 6C:2, 7C:1, 9C:2, 12C:1, 13C:1	4G:30, 5G:4, 6G:1
Chordata	Lepidosauria	Squamata	Dipsadidae	Leptodeira	Leptodeira polysticta	EU728590.1	23038	4A:242, 5A:143, 6A:14, 7A:7, 8A:3, 9A:1	4T:100, 5T:25, 6T:55	4C:53, 5C:14, 6C:5, 7C:1, 8C:1, 9C:1	4G:14, 5G:3, 6G:2
Chordata	Lepidosauria	Squamata	Dipsadidae	Hypsiglena	Hypsiglena chlorophaea	EU728593.1	17209	4A:83, 5A:39, 6A:15, 7A:8, 8A:4, 9A:1	4T:42, 5T:14, 6T:10, 7T:2	4C:54, 5C:22, 7C:1, 9C:6	4G:17, 5G:4, 6G:2, 7G:2
Chordata	Aves	Anseriformes	Anatidae	Cairina	Cairina moschata	NC_010965.1	16610	4A:62, 5A:29, 6A:4, 7A:1, 8A:1	4T:18, 5T:8, 6T:1	4C:83, 5C:40, 6C:12, 7C:3, 8C:1, 9C:1, 10C:1, 11C:1	4G:24, 5G:8, 6G:2
Onychophora	Udeonychophora	Euonychophora	Peripatopsidae	Metaperipatus	Metaperipatus inae	NC_010961.1	15347	4A:129, 5A:50, 6A:16, 7A:12, 8A:3, 9A:1	4T:197, 5T:87, 6T:26, 7T:15, 8T:10, 9T:1	4C:9, 5C:1, 8C:1	4G:15, 5G:3, 6G:1
Chordata	Actinopteri	Alepocephaliformes	Alepocephalidae	Bathyprion	Bathyprion danae	AP009400.1	16757	4A:75, 5A:20, 6A:4, 7A:2, 8A:1	4T:40, 5T:5, 6T:1, 10T:1	4C:109, 5C:44, 6C:14, 7C:3, 8C:1	4G:39, 5G:12, 6G:2
Chordata	Actinopteri	Gonorynchiformes	Gonorynchidae	Gonorynchus	Gonorynchus abbreviatus	AP009402.1	16535	4A:39, 5A:14, 6A:2	4T:46, 5T:20, 6T:5, 10T:1	4C:68, 5C:43, 6C:11, 7C:2, 9C:1	4G:40, 5G:18, 6G:3, 7G:1
Chordata	Actinopteri	Alepocephaliformes	Leptochilichthyidae	Leptochilichthys	Leptochilichthys agassizii	AP009403.1	16629	4A:62, 5A:22, 6A:6, 7A:1	4T:32, 5T:4, 6T:2, 8T:1	4C:101, 5C:38, 6C:11, 7C:2, 12C:1	4G:34, 5G:14, 6G:1, 7G:1
Chordata	Actinopteri	Alepocephaliformes	Platytroctidae	Maulisia	Maulisia mauli	AP009404.1	17053	4A:59, 5A:20, 6A:6, 7A:1	4T:41, 5T:7, 6T:1, 14T:1	4C:109, 5C:64, 6C:16, 7C:4, 8C:2, 12C:1	4G:31, 5G:17, 9G:1, 11G:1
Chordata	Actinopteri	Alepocephaliformes	Platytroctidae	Normichthys	Normichthys operosus	AP009406.1	17488	4A:62, 5A:21, 6A:7, 7A:2	4T:45, 5T:4, 6T:3, 7T:1	4C:105, 5C:66, 6C:17, 7C:2, 8C:2, 9C:1, 11C:1	4G:28, 5G:16, 10G:1, 15G:1
Chordata	Actinopteri	Alepocephaliformes	Alepocephalidae	Bathylaco	Bathylaco nigricans	AP009494.1	15161	4A:56, 5A:20, 6A:5, 7A:1	4T:23, 5T:2	4C:99, 5C:61, 6C:11	4G:33, 5G:15, 6G:1
Chordata	Actinopteri	Alepocephaliformes	Platytroctidae	Sagamichthys	Sagamichthys abei	AP009495.1	17143	4A:65, 5A:20, 6A:8, 7A:1	4T:28, 5T:9, 6T:1, 10T:1	4C:111, 5C:63, 6C:19, 7C:4, 8C:4, 9C:1	4G:29, 5G:15, 6G:5, 7G:1
Annelida	Polychaeta	Terebellida	Trichobranchidae	Terebellides	Terebellides stroemii	NC_011014.1	15755	4A:92, 5A:31, 6A:10, 7A:2, 8A:1	4T:149, 5T:59, 6T:12, 7T:4, 8T:4, 9T:3, 15T:1	4C:20, 5C:8, 6C:2, 7C:1, 11C:1	4G:19, 5G:3, 6G:1, 7G:1, 17G:1
Platyhelminthes	Cestoda	Diphyllobothriidea	Diphyllobothriidae	Spirometra	Spirometra mansoni	AB374543.1	13643	4A:17, 5A:5, 6A:1, 7A:1	4T:223, 5T:71, 6T:49, 7T:21, 8T:4, 9T:2, 10T:1, 13T:1	4C:6, 5C:6, 6C:1, 7C:1	4G:48, 5G:17, 6G:9, 7G:7, 10G:1
Chordata	Mammalia	Primates	Indriidae	Propithecus	Propithecus verreauxi	AB286049.1	17104	4A:86, 5A:30, 6A:13, 7A:1, 8A:1	4T:36, 5T:11, 6T:1	4C:60, 5C:18, 6C:3	4G:9, 5G:1
Mollusca	Bivalvia	Cardiida	Solecurtidae	Sinonovacula	Sinonovacula constricta	NC_011075.1	17225	4A:73, 5A:31, 6A:12, 7A:4, 8A:1, 9A:1, 10A:1, 12A:1	4T:205, 5T:105, 6T:47, 7T:31, 8T:9, 9T:5, 10T:2, 11T:1	4C:4, 5C:3	4G:58, 5G:20, 6G:11, 7G:1
Chordata	Mammalia	Carnivora	Ursidae	Ailuropoda	Ailuropoda melanoleuca	FM177761.1	16796	4A:65, 5A:34, 6A:11, 7A:5	4T:57, 5T:8, 6T:7	4C:47, 5C:12, 6C:6, 7C:1	4G:19, 5G:4, 7G:1
Chordata	Mammalia	Carnivora	Ursidae	Arctodus	Arctodus simus	FM177762.1	16754	4A:71, 5A:37, 6A:9, 7A:4, 8A:3	4T:39, 5T:12, 6T:1, 7T:1, 8T:1, 10T:1	4C:52, 5C:15, 6C:4, 7C:1	4G:9, 5G:3, 7G:1
Chordata	Mammalia	Carnivora	Ursidae	Melursus	Melursus ursinus	FM177763.1	16809	4A:71, 5A:34, 6A:11, 7A:5	4T:41, 5T:10, 6T:2, 7T:1, 9T:2	4C:51, 5C:19, 6C:7, 7C:1	4G:16, 5G:3, 6G:2, 7G:1
Chordata	Mammalia	Carnivora	Ursidae	Tremarctos	Tremarctos ornatus	FM177764.1	16752	4A:69, 5A:36, 6A:10, 7A:4, 8A:1	4T:43, 5T:8, 6T:3, 9T:1, 10T:1	4C:46, 5C:14, 6C:8	4G:14, 5G:2, 7G:1
Arthropoda	Insecta	Orthoptera	Acrididae	Gastrimargus	Gastrimargus marmoratus	NC_011114.1	15924	4A:187, 5A:80, 6A:35, 7A:14, 8A:7, 9A:6, 10A:4, 11A:2	4T:55, 5T:21, 6T:3, 7T:1	4C:6, 5C:1	5G:1
Arthropoda	Insecta	Lepidoptera	Notodontidae	Ochrogaster	Ochrogaster lunifer	AM946601.1	15593	4A:144, 5A:55, 6A:27, 7A:14, 8A:5, 9A:2, 10A:1, 11A:1, 13A:1	4T:146, 5T:58, 6T:19, 7T:13, 8T:3, 9T:2, 12T:1, 20T:1	4C:31, 5C:16, 6C:4, 7C:1	4G:5, 5G:2
Chordata	Actinopteri	Beloniformes	Hemiramphidae	Hyporhamphus	Hyporhamphus sajori	AB370892.1	16721	4A:73, 5A:22, 6A:9	4T:76, 5T:32, 6T:2, 7T:4, 8T:1, 9T:1, 10T:1	4C:84, 5C:26, 6C:15, 7C:2	4G:28, 5G:15
Chordata	Actinopteri	Atheriniformes	Atherinopsidae	Menidia	Menidia menidia	AB370893.1	16456	4A:30, 5A:16, 6A:2, 7A:1	4T:35, 5T:19, 6T:2, 8T:2, 9T:1	4C:90, 5C:45, 6C:10, 7C:3	4G:27, 5G:15, 6G:2
Chordata	Actinopteri	Cyprinodontiformes	Aplocheilidae	Aplocheilus	Aplocheilus panchax	AB373005.1	16519	4A:66, 5A:30, 6A:6, 7A:2, 8A:2	4T:81, 5T:22, 6T:11, 7T:2	4C:83, 5C:29, 6C:7, 7C:4	4G:15, 5G:12
Chordata	Actinopteri	Atheriniformes	Isonidae	Iso	Iso hawaiiensis	AB373006.1	16567	4A:61, 5A:25, 6A:6, 7A:2	4T:61, 5T:12, 6T:5, 7T:3	4C:67, 5C:42, 6C:14	4G:27, 5G:11
Chordata	Actinopteri	Cichliformes	Cichlidae	Paretroplus	Paretroplus maculatus	AP009504.1	16486	4A:83, 5A:29, 6A:6, 7A:2	4T:36, 5T:12, 6T:4, 7T:2	4C:102, 5C:47, 6C:15, 7C:2	4G:16, 5G:5
Chordata	Actinopteri	Cichliformes	Cichlidae	Pseudetroplus	Pseudetroplus maculatus	AP009505.1	16457	4A:70, 5A:21, 6A:4, 7A:3	4T:46, 5T:20, 6T:7, 7T:2	4C:85, 5C:53, 6C:25, 7C:2, 9C:1	4G:17, 5G:4
Chordata	Actinopteri	Cichliformes	Cichlidae	Hypselecara	Hypselecara temporalis	AP009506.1	16544	4A:65, 5A:34, 6A:7, 7A:1, 8A:1	4T:61, 5T:23, 6T:5, 7T:4, 8T:1, 11T:1	4C:84, 5C:49, 6C:12, 7C:2	4G:25, 5G:11, 6G:1
Chordata	Actinopteri	Cichliformes	Cichlidae	Ptychochromoides	Ptychochromoides katria	AP009507.1	16556	4A:65, 5A:31, 6A:4, 7A:1	4T:57, 5T:18, 6T:2, 10T:1	4C:73, 5C:42, 6C:16, 7C:3	4G:14, 5G:6
Chordata	Actinopteri	Cichliformes	Cichlidae	Paratilapia	Paratilapia polleni	AP009508.1	16543	4A:69, 5A:28, 6A:6, 7A:1, 8A:1	4T:65, 5T:17, 6T:4, 7T:3, 9T:1	4C:84, 5C:39, 6C:21, 7C:1	4G:18, 5G:8, 6G:1
Chordata	Actinopteri	Cichliformes	Cichlidae	Tylochromis	Tylochromis polylepis	AP009509.1	16976	4A:71, 5A:33, 6A:7, 7A:2, 8A:1	4T:54, 5T:19, 6T:3, 10T:1	4C:97, 5C:54, 6C:12, 7C:1, 11C:1	4G:19, 5G:8, 6G:3
Arthropoda	Insecta	Zygentoma	Nicoletiidae	Atelura	Atelura formicaria	NC_011197.1	15205	4A:114, 5A:45, 6A:15, 7A:9, 8A:4, 9A:2, 10A:2, 11A:1	4T:69, 5T:25, 6T:5	4C:53, 5C:26, 6C:1, 7C:2	4G:15, 5G:7, 6G:2
Mollusca	Gastropoda	Neogastropoda	Muricidae	Rapana	Rapana venosa	NC_011193.1	15272	4A:86, 5A:24, 6A:9, 7A:4	4T:168, 5T:66, 6T:20, 7T:18, 8T:3	4C:11, 5C:1	4G:25, 5G:2
Chordata	Actinopteri	Cypriniformes	Xenocyprididae	Distoechodon	Distoechodon tumirostris	NC_011208.1	16620	4A:74, 5A:28, 6A:5, 7A:2	4T:51, 5T:10, 6T:1, 7T:1	4C:63, 5C:25, 6C:9, 7C:1	4G:24, 5G:6, 6G:1
Arthropoda	Insecta	Megaloptera	Corydalidae	Corydalus	Corydalus cornutus	NC_011276.1	15687	4A:135, 5A:70, 6A:19, 7A:9, 8A:7, 9A:2	4T:144, 5T:47, 6T:22, 7T:7, 8T:3, 9T:1, 10T:1	4C:23, 5C:9, 6C:2	4G:8, 5G:5, 6G:1, 7G:1
Arthropoda	Arachnida	Amblypygi	Phrynichidae	Damon	Damon diadema	NC_011293.1	14786	4A:123, 5A:47, 6A:15, 7A:9, 8A:5, 9A:3	4T:75, 5T:29, 6T:8, 7T:4, 8T:2, 9T:1	4C:84, 5C:32, 6C:15, 7C:6	4G:11, 5G:4, 7G:1
Arthropoda	Insecta	Orthoptera	Myrmecophilidae	Myrmecophilus	Myrmecophilus manni	NC_011301.1	15323	4A:117, 5A:38, 6A:17, 7A:8, 8A:4, 9A:2	4T:67, 5T:18, 6T:3, 8T:1	4C:18, 5C:18, 6C:3	4G:1, 5G:3
Arthropoda	Insecta	Orthoptera	Rhaphidophoridae	Troglophilus	Troglophilus neglectus	NC_011306.1	15810	4A:130, 5A:50, 6A:18, 7A:8, 8A:3, 9A:3	4T:117, 5T:36, 6T:12, 7T:1	4C:24, 5C:7, 6C:2	4G:4
Chordata	Actinopteri	Tetraodontiformes	Balistidae	Xenobalistes	Xenobalistes tumidipectoris	AP009182.1	16518	4A:68, 5A:30, 6A:6, 7A:1, 8A:1	4T:35, 5T:10, 6T:1	4C:80, 5C:54, 6C:10, 7C:3	4G:25, 5G:7
Chordata	Actinopteri	Tetraodontiformes	Monacanthidae	Aluterus	Aluterus scriptus	AP009183.1	16451	4A:56, 5A:28, 6A:4, 7A:1	4T:45, 5T:9, 6T:2	4C:82, 5C:54, 6C:13, 7C:1, 8C:1, 12C:1	4G:20, 5G:13, 6G:3
Chordata	Actinopteri	Tetraodontiformes	Monacanthidae	Cantherhines	Cantherhines pardalis	AP009184.1	16426	4A:60, 5A:27, 6A:6, 7A:1	4T:63, 5T:11, 6T:5, 7T:1	4C:77, 5C:41, 6C:9, 7C:2	4G:24, 5G:10
Chordata	Actinopteri	Tetraodontiformes	Monacanthidae	Thamnaconus	Thamnaconus modestus	AP009185.1	16440	4A:64, 5A:26, 6A:7, 7A:2	4T:59, 5T:10, 6T:3, 7T:1	4C:67, 5C:39, 6C:9, 7C:2	4G:32, 5G:14, 6G:2
Chordata	Actinopteri	Tetraodontiformes	Aracanidae	Anoplocapros	Anoplocapros lenticularis	AP009186.1	16492	4A:56, 5A:17, 6A:5, 8A:1	4T:46, 5T:23, 6T:3, 15T:1	4C:70, 5C:29, 6C:8	4G:27, 5G:9
Chordata	Actinopteri	Tetraodontiformes	Ostraciidae	Lactoria	Lactoria diaphana	AP009187.1	16486	4A:68, 5A:25, 6A:5, 8A:1	4T:64, 5T:12, 6T:8	4C:78, 5C:35, 6C:12	4G:16, 5G:12
Chordata	Mammalia	Artiodactyla	Bovidae	Ammotragus	Ammotragus lervia	FJ207522.1	16540	4A:76, 5A:39, 6A:10, 7A:7, 8A:1	4T:38, 5T:8, 6T:3	4C:49, 5C:23, 6C:7, 7C:1	4G:8, 5G:3
Arthropoda	Insecta	Coleoptera	Trachypachidae	Trachypachus	Trachypachus holmbergi	NC_011329.1	15722	4A:148, 5A:63, 6A:22, 7A:11, 8A:7, 9A:3, 10A:1, 11A:1	4T:153, 5T:65, 6T:29, 7T:12, 8T:6, 9T:2	4C:21, 5C:1, 6C:1	4G:2
Arthropoda	Insecta	Coleoptera	Phloeostichidae	Priasilpha	Priasilpha obscura	NC_011326.1	16603	4A:187, 5A:71, 6A:43, 7A:11, 8A:5, 9A:1	4T:159, 5T:61, 6T:28, 7T:9, 8T:9, 9T:2	4C:39, 5C:12, 6C:4, 7C:3	4G:10, 5G:2, 7G:1
Arthropoda	Insecta	Coleoptera	Chaetosomatidae	Chaetosoma	Chaetosoma scaritides	NC_011324.1	15511	4A:167, 5A:71, 6A:29, 7A:18, 8A:10, 9A:3, 10A:2	4T:158, 5T:60, 6T:16, 7T:14, 8T:4, 9T:2, 10T:2	4C:23, 5C:8, 6C:1	4G:2, 5G:1
Arthropoda	Insecta	Coleoptera	Ommatidae	Tetraphalerus	Tetraphalerus bruchi	NC_011328.1	15689	4A:129, 5A:67, 6A:40, 7A:24, 8A:3, 9A:2, 12A:1	4T:33, 5T:16, 6T:6, 8T:2	4C:27, 5C:13, 6C:2	4G:11, 7G:1
Arthropoda	Insecta	Ephemeroptera	Heptageniidae	Parafronurus	Parafronurus youi	NC_011359.1	15481	4A:108, 5A:47, 6A:8, 7A:3	4T:119, 5T:35, 6T:9, 7T:2, 8T:1	4C:41, 5C:7	4G:17, 5G:2
Chordata	Actinopteri	Cyprinodontiformes	Poeciliidae	Xiphophorus	Xiphophorus maculatus	AP005982.1	16646	4A:75, 5A:26, 6A:8, 7A:4	4T:54, 5T:21, 6T:7, 7T:1, 8T:2	4C:94, 5C:58, 6C:23, 7C:1, 11C:1	4G:19, 5G:11, 6G:2
Chordata	Actinopteri	Cyprinodontiformes	Fundulidae	Fundulus	Fundulus olivaceus	AP006776.1	16509	4A:59, 5A:17, 6A:9, 7A:1	4T:90, 5T:24, 6T:8, 7T:2	4C:64, 5C:28, 6C:7, 7C:3	4G:15, 5G:13
Chordata	Actinopteri	Cyprinodontiformes	Goodeidae	Xenotoca	Xenotoca eiseni	AP006777.1	16735	4A:88, 5A:27, 6A:5, 7A:2, 8A:2	4T:78, 5T:19, 6T:4, 7T:2	4C:78, 5C:21, 6C:12, 7C:3	4G:15, 5G:7, 6G:2
Chordata	Actinopteri	Cyprinodontiformes	Cyprinodontidae	Jordanella	Jordanella floridae	AP006778.1	16177	4A:64, 5A:19, 6A:6, 7A:1, 8A:1, 9A:1	4T:64, 5T:15, 6T:6, 9T:1	4C:77, 5C:37, 6C:8	4G:22, 5G:9, 6G:2
Chordata	Lepidosauria	Squamata	Elapidae	Naja	Naja atra	NC_011389.1	17216	4A:83, 5A:37, 6A:9, 7A:4, 8A:3, 9A:3	4T:35, 5T:18, 6T:2, 7T:5, 8T:1	4C:57, 5C:18, 6C:3, 7C:1, 8C:1, 10C:1, 12C:1	4G:15, 5G:5
Chordata	Lepidosauria	Squamata	Elapidae	Ophiophagus	Ophiophagus hannah	NC_011394.1	17267	4A:91, 5A:28, 6A:10, 7A:5, 8A:3, 9A:2	4T:27, 5T:15, 6T:2, 7T:4	4C:49, 5C:19, 6C:5, 7C:2, 8C:1, 9C:2, 10C:2	4G:16, 5G:2, 7G:1
Arthropoda	Insecta	Megaloptera	Corydalidae	Protohermes	Protohermes concolorus	NC_011524.1	15851	4A:119, 5A:51, 6A:23, 7A:14, 8A:5, 9A:1, 11A:1	4T:156, 5T:66, 6T:28, 7T:4, 8T:3, 9T:1, 11T:1, 14T:1	4C:22, 5C:12, 6C:3, 7C:1	4G:6, 5G:1
Chordata	Actinopteri	Perciformes	Gasterosteidae	Culaea	Culaea inconstans	AB445125.1	16465	4A:54, 5A:28, 6A:6	4T:62, 5T:26, 6T:4, 7T:3	4C:69, 5C:32, 6C:6, 8C:1	4G:22, 5G:6, 7G:1
Chordata	Actinopteri	Perciformes	Gasterosteidae	Apeltes	Apeltes quadracus	AB445126.1	16472	4A:65, 5A:24, 6A:4	4T:55, 5T:21, 6T:7, 7T:1, 8T:1, 10T:1, 12T:1	4C:75, 5C:45, 6C:2, 13C:1	4G:26, 5G:10, 9G:1
Chordata	Actinopteri	Perciformes	Gasterosteidae	Spinachia	Spinachia spinachia	AB445128.1	16359	4A:69, 5A:36, 6A:6, 7A:2, 8A:1, 10A:1	4T:109, 5T:36, 6T:14, 10T:1	4C:63, 5C:24, 6C:6	4G:15, 5G:5, 6G:1
Chordata	Actinopteri	Perciformes	Gasterosteidae	Gasterosteus	Gasterosteus wheatlandi	AB445129.1	16538	4A:51, 5A:22, 6A:3	4T:60, 5T:26, 6T:5, 7T:1, 8T:1, 12T:1	4C:78, 5C:24, 6C:3	4G:21, 5G:9, 6G:1
Chordata	Actinopteri	Perciformes	Gasterosteidae	Pungitius	Pungitius pungitius	AB445130.1	16388	4A:50, 5A:20	4T:48, 5T:17, 6T:2, 7T:1, 9T:1, 12T:1	4C:85, 5C:31, 6C:5, 12C:1	4G:39, 5G:16
Arthropoda	Arachnida	Sarcoptiformes	Steganacaridae	Steganacarus	Steganacarus magnus	NC_011574.1	13818	4A:162, 5A:72, 6A:18, 7A:13, 8A:7, 9A:3, 10A:1, 13A:1	4T:164, 5T:79, 6T:28, 7T:18, 8T:4, 9T:1	4C:11, 5C:5	4G:12, 5G:4
Mollusca	Cephalopoda	Oegopsida	Architeuthidae	Architeuthis	Architeuthis dux	NC_011581.1	20331	4A:134, 5A:64, 6A:22, 7A:17, 8A:5, 9A:2, 10A:3	4T:91, 5T:27, 6T:17, 7T:4, 9T:1, 10T:1	4C:54, 5C:23, 6C:3, 7C:3	4G:16, 5G:3, 7G:2
Chordata	Amphibia	Caudata	Salamandridae	Calotriton	Calotriton asper	EU880307.1	16641	4A:88, 5A:38, 6A:14, 7A:7, 8A:3	4T:65, 5T:31, 6T:9, 7T:3, 8T:5, 9T:1	4C:61, 5C:14, 6C:15, 7C:4, 8C:3, 9C:1	4G:18, 5G:6, 6G:3, 7G:2
Chordata	Amphibia	Caudata	Salamandridae	Chioglossa	Chioglossa lusitanica	EU880308.1	16584	4A:100, 5A:40, 6A:13, 7A:9, 8A:1	4T:93, 5T:34, 6T:15, 7T:5, 8T:2, 9T:1, 11T:1	4C:41, 5C:22, 6C:3, 7C:5, 10C:1	4G:16, 5G:4, 6G:1
Chordata	Amphibia	Caudata	Salamandridae	Euproctus	Euproctus platycephalus	EU880317.1	16307	4A:98, 5A:42, 6A:16, 7A:8, 8A:1, 9A:2	4T:93, 5T:28, 6T:10, 7T:9, 8T:1, 10T:1	4C:35, 5C:7, 6C:6	4G:10, 5G:4
Chordata	Amphibia	Caudata	Salamandridae	Mertensiella	Mertensiella caucasica	EU880319.1	17023	4A:77, 5A:35, 6A:14, 7A:6, 8A:1	4T:68, 5T:35, 6T:9, 7T:5, 8T:1, 11T:1	4C:52, 5C:32, 6C:9, 7C:1	4G:14, 5G:2, 6G:2
Chordata	Amphibia	Caudata	Salamandridae	Neurergus	Neurergus strauchii	EU880321.1	16319	4A:98, 5A:41, 6A:11, 7A:5, 8A:2	4T:50, 5T:26, 6T:10, 7T:2, 8T:3, 10T:1	4C:42, 5C:13, 6C:3, 7C:2, 8C:1	4G:18, 5G:4, 6G:2
Chordata	Amphibia	Caudata	Salamandridae	Pleurodeles	Pleurodeles waltl	EU880330.1	16392	4A:74, 5A:41, 6A:13, 7A:8, 8A:1	4T:79, 5T:22, 6T:9, 7T:8	4C:40, 5C:23, 6C:11, 7C:1	4G:11, 5G:3, 6G:2, 8G:1
Chordata	Amphibia	Caudata	Salamandridae	Salamandrina	Salamandrina terdigitata	EU880332.1	16252	4A:103, 5A:34, 6A:12, 7A:8, 8A:2	4T:79, 5T:34, 6T:8, 7T:1, 8T:2, 9T:1	4C:31, 5C:9, 6C:4, 7C:2, 8C:1	4G:12, 5G:4, 6G:1, 7G:2
Chordata	Amphibia	Caudata	Salamandridae	Taricha	Taricha rivularis	EU880334.1	16316	4A:92, 5A:33, 6A:11, 7A:7	4T:45, 5T:16, 6T:2, 7T:2, 8T:1, 9T:1, 10T:1	4C:55, 5C:19, 6C:8, 7C:3, 8C:2, 9C:1	4G:17, 5G:11, 7G:3, 10G:1
Chordata	Amphibia	Caudata	Salamandridae	Ommatotriton	Ommatotriton vittatus	EU880338.1	16303	4A:90, 5A:39, 6A:7, 7A:4, 8A:3, 9A:1	4T:70, 5T:33, 6T:15, 7T:5, 8T:1, 10T:1	4C:46, 5C:15, 6C:6, 7C:1, 8C:1	4G:18, 5G:5, 6G:1
Chordata	Amphibia	Caudata	Salamandridae	Lissotriton	Lissotriton vulgaris	EU880339.1	16369	4A:84, 5A:37, 6A:11, 7A:5, 8A:3	4T:69, 5T:26, 6T:12, 7T:4, 8T:2, 13T:1	4C:53, 5C:16, 6C:4, 7C:2	4G:21, 5G:8, 6G:2, 7G:1
Arthropoda	Insecta	Hemiptera	Aphididae	Acyrthosiphon	Acyrthosiphon pisum	NC_011594.1	16971	4A:209, 5A:136, 6A:40, 7A:25, 8A:23, 9A:11, 10A:7, 11A:4, 12A:2, 24A:1, 25A:1, 31A:1	4T:180, 5T:59, 6T:34, 7T:15, 8T:7, 10T:2	4C:2, 5C:1, 6C:1
Chordata	Lepidosauria	Squamata	Lacertidae	Phoenicolacerta	Phoenicolacerta kulzeri	NC_011606.1	17199	4A:82, 5A:37, 6A:12, 7A:3, 8A:2, 10A:1	4T:88, 5T:30, 6T:17, 7T:5, 8T:4	4C:57, 5C:26, 6C:11, 7C:3	4G:13, 5G:8, 6G:5
Chordata	Actinopteri	Tetraodontiformes	Tetraodontidae	Lagocephalus	Lagocephalus wheeleri	AP009538.1	16453	4A:75, 5A:27, 6A:7, 7A:1	4T:40, 5T:13, 6T:7	4C:92, 5C:50, 6C:15	4G:21, 5G:12, 6G:1
Chordata	Actinopteri	Tetraodontiformes	Tetraodontidae	Takifugu	Takifugu exascurus	AP009540.1	16443	4A:80, 5A:30, 6A:9, 7A:4, 8A:1, 10A:1	4T:46, 5T:13, 6T:4	4C:71, 5C:47, 6C:8, 7C:2	4G:19, 5G:5
Arthropoda	Insecta	Hemiptera	Belostomatidae	Diplonychus	Diplonychus rusticus	FJ456940.1	14596	4A:137, 5A:73, 6A:28, 7A:21, 8A:9, 9A:2	4T:68, 5T:14, 6T:6, 7T:1	4C:33, 5C:5, 6C:1, 7C:1	4G:14, 5G:4, 6G:2
Arthropoda	Insecta	Hemiptera	Ochteridae	Ochterus	Ochterus marginatus	FJ456950.1	14609	4A:169, 5A:74, 6A:46, 7A:19, 8A:10, 9A:12, 10A:2, 11A:1	4T:55, 5T:18, 6T:9, 7T:1	4C:25, 5C:6, 6C:2	4G:8, 5G:3, 6G:1
Arthropoda	Insecta	Hymenoptera	Stephanidae	Schlettererius	Schlettererius cinctipes	FJ478175.1	10984	4A:104, 5A:50, 6A:24, 7A:9, 8A:5, 9A:2, 10A:1, 12A:1	4T:100, 5T:54, 6T:15, 7T:4, 8T:2	4C:10, 5C:2	4G:1
Arthropoda	Insecta	Hymenoptera	Ichneumonidae	Enicospilus	Enicospilus sp.	FJ478177.1	15300	4A:142, 5A:52, 6A:28, 7A:20, 8A:7, 9A:1, 10A:2, 11A:2, 12A:1	4T:203, 5T:56, 6T:38, 7T:10, 8T:8, 9T:5, 10T:2, 11T:1, 13T:1	4C:3, 5C:2, 6C:1	4G:2
Arthropoda	Insecta	Hemiptera	Pentatomidae	Nezara	Nezara viridula	NC_011755.1	16889	4A:166, 5A:66, 6A:24, 7A:16, 8A:3, 9A:3	4T:84, 5T:31, 6T:8, 7T:3	4C:24, 5C:7, 6C:1	4G:5, 5G:1
Arthropoda	Hexanauplia	Cyclopoida	Cyclopettidae	Paracyclopina	Paracyclopina nana	EU877959.1	15981	4A:145, 5A:73, 6A:27, 7A:13, 8A:9, 9A:4, 10A:2, 11A:1	4T:113, 5T:57, 6T:18, 7T:9, 8T:6, 10T:1	4C:25, 5C:2, 6C:2, 7C:2	4G:19, 5G:4, 6G:2
Chordata	Mammalia	Proboscidea	Elephantidae	Loxodonta	Loxodonta africana	AB443879.1	16945	4A:69, 5A:37, 6A:7, 7A:2, 9A:1	4T:52, 5T:4, 6T:5, 7T:2, 9T:1	4C:44, 5C:9, 6C:3	4G:12, 5G:2, 9G:1
Arthropoda	Insecta	Orthoptera	Tettigoniidae	Deracantha	Deracantha onos	NC_011813.1	15650	4A:104, 5A:41, 6A:14, 7A:6, 8A:3, 11A:1	4T:73, 5T:24, 6T:4, 7T:3, 8T:2, 20T:1	4C:28, 5C:11, 6C:3	4G:6, 5G:4
Chordata	Mammalia	Artiodactyla	Cervidae	Hydropotes	Hydropotes inermis	NC_011821.1	16355	4A:80, 5A:39, 6A:10, 7A:3, 8A:2	4T:87, 5T:23, 6T:11, 7T:1	4C:38, 5C:12, 6C:2, 9C:1	4G:3, 5G:3, 6G:1
Chordata	Chondrichthyes	Lamniformes	Mitsukurinidae	Mitsukurina	Mitsukurina owstoni	NC_011825.1	17743	4A:110, 5A:57, 6A:8, 7A:4	4T:71, 5T:26, 6T:6, 7T:3	4C:64, 5C:32, 6C:7	4G:13, 5G:5, 6G:1, 7G:1
Annelida	Sipuncula	Golfingiida	Sipunculidae	Sipunculus	Sipunculus nudus	NC_011826.1	15502	4A:52, 5A:28, 6A:6, 7A:5, 8A:1	4T:81, 5T:29, 6T:3, 9T:1	4C:72, 5C:30, 6C:11, 10C:2	4G:33, 5G:3, 9G:1
Chordata	Actinopteri	Tetraodontiformes	Monacanthidae	Brachaluteres	Brachaluteres ulvarum	AP009215.1	16421	4A:63, 5A:32, 6A:8, 7A:2	4T:66, 5T:23, 6T:5, 7T:3, 8T:1	4C:74, 5C:48, 6C:13, 7C:5	4G:26, 5G:8
Chordata	Actinopteri	Tetraodontiformes	Balistidae	Abalistes	Abalistes stellaris	AP009202.1	16502	4A:65, 5A:33, 6A:5, 7A:2, 8A:1	4T:46, 5T:12, 6T:6, 8T:1	4C:77, 5C:33, 6C:15, 7C:3	4G:15, 5G:9, 6G:1
Chordata	Actinopteri	Tetraodontiformes	Balistidae	Balistapus	Balistapus undulatus	AP009203.1	16492	4A:64, 5A:30, 6A:9, 7A:1, 8A:1	4T:40, 5T:15, 6T:4	4C:73, 5C:39, 6C:12	4G:15, 5G:7, 6G:1
Chordata	Actinopteri	Tetraodontiformes	Balistidae	Balistes	Balistes vetula	AP009204.1	16518	4A:63, 5A:26, 6A:8, 7A:1, 8A:1	4T:58, 5T:14, 6T:3	4C:72, 5C:48, 6C:15	4G:15, 5G:8, 6G:1
Chordata	Actinopteri	Tetraodontiformes	Monacanthidae	Eubalichthys	Eubalichthys mosaicus	AP009217.1	16442	4A:60, 5A:29, 6A:6, 7A:2	4T:67, 5T:11, 6T:7	4C:66, 5C:42, 6C:8, 7C:2	4G:21, 5G:10
Chordata	Actinopteri	Tetraodontiformes	Monacanthidae	Meuschenia	Meuschenia hippocrepis	AP009218.1	16438	4A:63, 5A:23, 6A:6, 7A:2	4T:56, 5T:10, 6T:4	4C:77, 5C:36, 6C:11, 7C:4	4G:32, 5G:13, 6G:2
Chordata	Actinopteri	Tetraodontiformes	Monacanthidae	Monacanthus	Monacanthus chinensis	AP009219.1	16430	4A:62, 5A:38, 6A:7, 7A:2	4T:42, 5T:10, 6T:6	4C:66, 5C:31, 6C:8, 7C:4	4G:17, 5G:6, 6G:2
Chordata	Actinopteri	Tetraodontiformes	Monacanthidae	Nelusetta	Nelusetta ayraudi	AP009220.1	16297	4A:57, 5A:24, 6A:6, 7A:2	4T:48, 5T:11, 6T:5, 7T:1	4C:67, 5C:45, 6C:13, 7C:2, 8C:1	4G:34, 5G:12, 6G:3
Chordata	Actinopteri	Tetraodontiformes	Monacanthidae	Oxymonacanthus	Oxymonacanthus longirostris	AP009221.1	16597	4A:72, 5A:22, 6A:7, 7A:1	4T:58, 5T:17, 6T:5, 7T:1	4C:96, 5C:48, 6C:10, 7C:2, 8C:1	4G:21, 5G:12, 6G:3
Chordata	Actinopteri	Tetraodontiformes	Monacanthidae	Paraluteres	Paraluteres prionurus	AP009222.1	16427	4A:69, 5A:35, 6A:8, 7A:4, 8A:1	4T:52, 5T:13, 6T:5, 7T:2, 8T:1	4C:67, 5C:37, 6C:7, 7C:5	4G:21, 5G:9, 6G:1, 7G:1
Chordata	Actinopteri	Tetraodontiformes	Monacanthidae	Paramonacanthus	Paramonacanthus choirocephalus	AP009223.1	16425	4A:66, 5A:33, 6A:6, 7A:2	4T:54, 5T:7, 6T:1, 8T:1	4C:71, 5C:36, 6C:8, 7C:3	4G:19, 5G:10
Chordata	Actinopteri	Tetraodontiformes	Monacanthidae	Pervagor	Pervagor janthinosoma	AP009224.1	16526	4A:61, 5A:19, 6A:8	4T:52, 5T:22, 6T:2, 7T:1	4C:73, 5C:43, 6C:13, 7C:2, 8C:1	4G:28, 5G:14
Chordata	Actinopteri	Tetraodontiformes	Monacanthidae	Pseudomonacanthus	Pseudomonacanthus peroni	AP009225.1	16434	4A:68, 5A:28, 6A:6, 7A:1	4T:46, 5T:12, 6T:3	4C:77, 5C:44, 6C:19	4G:17, 5G:7, 6G:1
Chordata	Actinopteri	Tetraodontiformes	Balistidae	Balistoides	Balistoides conspicillum	AP009205.1	16549	4A:72, 5A:30, 6A:9, 7A:1	4T:44, 5T:17, 6T:4	4C:70, 5C:38, 6C:13	4G:9, 5G:7, 6G:1
Chordata	Actinopteri	Tetraodontiformes	Balistidae	Canthidermis	Canthidermis maculata	AP009206.1	16524	4A:76, 5A:29, 6A:5, 7A:3, 8A:1	4T:45, 5T:16, 6T:5, 8T:1	4C:69, 5C:35, 6C:5, 7C:3	4G:14, 5G:3
Chordata	Actinopteri	Tetraodontiformes	Balistidae	Melichthys	Melichthys vidua	AP009207.1	16503	4A:64, 5A:31, 6A:3, 7A:1, 8A:1	4T:36, 5T:16, 6T:5, 7T:1	4C:72, 5C:46, 6C:13, 7C:3	4G:8, 5G:7, 6G:1
Chordata	Actinopteri	Tetraodontiformes	Balistidae	Odonus	Odonus niger	AP009208.1	16554	4A:69, 5A:32, 6A:8, 7A:1, 8A:1	4T:37, 5T:8, 6T:2	4C:72, 5C:36, 6C:14	4G:18, 5G:7
Chordata	Actinopteri	Tetraodontiformes	Balistidae	Pseudobalistes	Pseudobalistes flavimarginatus	AP009209.1	16515	4A:68, 5A:32, 6A:8, 7A:2, 8A:1	4T:36, 5T:12, 6T:5	4C:83, 5C:41, 6C:11, 7C:2, 8C:1	4G:14, 5G:6
Chordata	Actinopteri	Tetraodontiformes	Balistidae	Rhinecanthus	Rhinecanthus aculeatus	AP009210.1	16491	4A:63, 5A:26, 6A:4, 7A:3	4T:42, 5T:13, 6T:3	4C:75, 5C:35, 6C:11	4G:16, 5G:7, 6G:1
Chordata	Actinopteri	Tetraodontiformes	Balistidae	Xanthichthys	Xanthichthys auromarginatus	AP009211.1	16515	4A:66, 5A:29, 6A:6, 7A:1, 8A:1	4T:35, 5T:12, 6T:1, 8T:1	4C:87, 5C:51, 6C:12, 7C:1, 8C:2	4G:23, 5G:8
Chordata	Actinopteri	Tetraodontiformes	Monacanthidae	Acanthaluteres	Acanthaluteres brownii	AP009212.1	16441	4A:56, 5A:24, 6A:6, 7A:2	4T:47, 5T:13, 6T:4	4C:71, 5C:36, 6C:6, 7C:4	4G:36, 5G:11, 6G:1
Chordata	Actinopteri	Tetraodontiformes	Monacanthidae	Acreichthys	Acreichthys tomentosus	AP009213.1	16446	4A:71, 5A:20, 6A:11, 7A:2	4T:50, 5T:22, 6T:5, 7T:1	4C:66, 5C:30, 6C:6, 7C:3	4G:21, 5G:10, 6G:2, 10G:1
Chordata	Actinopteri	Tetraodontiformes	Monacanthidae	Amanses	Amanses scopas	AP009214.1	16440	4A:66, 5A:34, 6A:7, 7A:1	4T:44, 5T:5, 6T:2, 7T:1	4C:81, 5C:48, 6C:14, 7C:4, 8C:1	4G:30, 5G:15, 6G:2
Chordata	Actinopteri	Tetraodontiformes	Monacanthidae	Pseudalutarius	Pseudalutarius nasicornis	AP009226.1	16582	4A:66, 5A:24, 6A:9, 7A:4	4T:48, 5T:17, 6T:6, 7T:2, 8T:1	4C:77, 5C:52, 6C:12, 7C:6, 8C:4, 10C:1	4G:21, 5G:11, 6G:2, 7G:1
Chordata	Actinopteri	Tetraodontiformes	Monacanthidae	Rudarius	Rudarius ercodes	AP009227.1	16447	4A:63, 5A:31, 6A:6, 7A:3	4T:77, 5T:29, 6T:10, 7T:1, 8T:1	4C:67, 5C:36, 6C:7	4G:33, 5G:13, 6G:2
Chordata	Actinopteri	Tetraodontiformes	Monacanthidae	Scobinichthys	Scobinichthys granulatus	AP009228.1	16440	4A:62, 5A:24, 6A:7, 7A:2	4T:57, 5T:14, 6T:5	4C:70, 5C:36, 6C:8, 7C:4	4G:34, 5G:10, 6G:1
Arthropoda	Insecta	Strepsiptera	Xenidae	Xenos	Xenos vesparum	AM286745.1	14496	4A:153, 5A:84, 6A:32, 7A:25, 8A:10, 9A:10, 10A:1, 11A:1	4T:108, 5T:56, 6T:18, 7T:8, 8T:3, 9T:2, 10T:2	4C:20, 5C:4	4G:1, 6G:1
Chordata	Mammalia	Dasyuromorphia	Thylacinidae	Thylacinus	Thylacinus cynocephalus	NC_011944.1	17411	4A:86, 5A:46, 6A:6, 7A:7, 8A:3, 28A:1	4T:56, 5T:15, 6T:6, 8T:5, 9T:2, 16T:1	4C:25, 5C:10, 6C:1, 7C:1	4G:8, 5G:5
Chordata	Actinopteri	Beryciformes	Barbourisiidae	Barbourisia	Barbourisia rufa	AP010879.1	16534	4A:56, 5A:28, 6A:1, 7A:1	4T:51, 5T:18, 6T:4, 7T:1, 10T:1	4C:87, 5C:44, 6C:18, 7C:6	4G:20, 5G:11, 6G:2, 7G:1
Chordata	Actinopteri	Beryciformes	Cetomimidae	Procetichthys	Procetichthys kreffti	AP010880.1	16527	4A:69, 5A:29, 6A:5, 7A:1	4T:45, 5T:18, 6T:7, 8T:1	4C:79, 5C:42, 6C:18, 7C:2, 8C:1	4G:17, 5G:9, 6G:2, 7G:1
Chordata	Actinopteri	Beryciformes	Cetomimidae	Cetostoma	Cetostoma regani	AP010882.1	16494	4A:68, 5A:21, 6A:2, 7A:1, 8A:1	4T:75, 5T:31, 6T:10, 7T:2, 9T:1	4C:80, 5C:25, 6C:20, 7C:3, 8C:1, 10C:1, 11C:1	4G:24, 5G:8, 6G:1, 7G:1
Chordata	Actinopteri	Beryciformes	Cetomimidae	Gyrinomimus	Gyrinomimus myersi	AP010884.1	16568	4A:67, 5A:21, 6A:7, 7A:2, 9A:1	4T:78, 5T:26, 6T:10, 7T:3, 8T:1	4C:78, 5C:32, 6C:16, 7C:9, 8C:2, 9C:2	4G:24, 5G:10, 6G:4
Chordata	Actinopteri	Beryciformes	Cetomimidae	Eutaeniophorus	Eutaeniophorus festivus	AP010885.1	16528	4A:67, 5A:24, 6A:8, 7A:3	4T:85, 5T:28, 6T:8, 7T:3, 8T:1	4C:72, 5C:32, 6C:15, 7C:5, 8C:1, 9C:1	4G:18, 5G:12, 6G:2
Chordata	Actinopteri	Beryciformes	Cetomimidae	Parataeniophorus	Parataeniophorus gulosus	AP010886.1	16494	4A:72, 5A:18, 6A:2, 7A:2, 8A:1	4T:71, 5T:30, 6T:8, 7T:3, 9T:1	4C:78, 5C:28, 6C:21, 7C:4, 8C:2, 11C:1	4G:18, 5G:9, 7G:1, 8G:1
Chordata	Actinopteri	Beryciformes	Cetomimidae	Ataxolepis	Ataxolepis apus	AP010887.1	16528	4A:67, 5A:22, 6A:8, 7A:3	4T:85, 5T:29, 6T:8, 7T:3, 8T:1	4C:73, 5C:31, 6C:15, 7C:7, 8C:1, 9C:1	4G:18, 5G:13, 6G:2, 7G:1
Arthropoda	Insecta	Hymenoptera	Mutillidae	Wallacidia	Wallacidia oculata	FJ611801.1	18442	4A:216, 5A:99, 6A:38, 7A:22, 8A:19, 9A:5, 10A:2, 11A:1, 12A:1	4T:107, 5T:78, 6T:8, 7T:4, 8T:1, 9T:2	4C:29, 5C:13, 6C:4, 7C:2, 8C:1, 10C:1	4G:8, 5G:6, 6G:1, 7G:1
Chordata	Mammalia	Artiodactyla	Bovidae	Antilope	Antilope cervicapra	AP003422.1	16431	4A:89, 5A:43, 6A:7, 7A:4, 8A:3	4T:43, 5T:10, 6T:5, 7T:3	4C:42, 5C:22, 6C:5, 7C:2	4G:5, 5G:2
Chordata	Mammalia	Artiodactyla	Camelidae	Camelus	Camelus bactrianus	AP003423.1	16663	4A:79, 5A:34, 6A:9, 7A:3, 8A:1, 9A:1	4T:46, 5T:14, 6T:1	4C:63, 5C:29, 6C:7	4G:10, 5G:5, 8G:1
Chordata	Mammalia	Artiodactyla	Giraffidae	Giraffa	Giraffa camelopardalis	AP003424.1	16433	4A:79, 5A:32, 6A:11, 7A:4, 8A:1, 9A:1	4T:42, 5T:20, 6T:6	4C:50, 5C:17, 6C:5, 7C:1, 12C:1	4G:7, 5G:3, 7G:1
Chordata	Mammalia	Artiodactyla	Hippopotamidae	Hippopotamus	Hippopotamus amphibius	AP003425.1	16402	4A:88, 5A:40, 6A:7, 7A:3	4T:29, 5T:6, 6T:1	4C:67, 5C:23, 6C:2, 7C:1	4G:10, 5G:4
Chordata	Mammalia	Artiodactyla	Camelidae	Lama	Lama glama	AP003426.1	16597	4A:82, 5A:31, 6A:12, 7A:2, 9A:1	4T:45, 5T:15, 6T:5	4C:68, 5C:24, 6C:5, 7C:1, 12C:1	4G:11, 5G:1, 6G:2, 9G:1
Chordata	Mammalia	Artiodactyla	Bovidae	Capricornis	Capricornis crispus	AP003429.1	16453	4A:73, 5A:35, 6A:14, 7A:6, 8A:1	4T:51, 5T:10, 6T:2, 7T:1	4C:54, 5C:14, 6C:7, 7C:1	4G:6, 5G:2
Chordata	Aves	Gruiformes	Rallidae	Hypotaenidia	Hypotaenidia okinawae	AP010821.1	18404	4A:121, 5A:51, 6A:3, 7A:6	4T:49, 5T:28, 7T:1, 8T:9	4C:77, 5C:45, 6C:16, 7C:2, 10C:1	4G:9, 5G:1, 6G:2
Chordata	Aves	Gruiformes	Rallidae	Rallina	Rallina eurizonoides	AP010822.1	16942	4A:89, 5A:33, 6A:5, 7A:7, 8A:2	4T:24, 5T:10, 6T:5, 7T:1, 9T:2, 12T:1	4C:69, 5C:33, 6C:6, 8C:1, 9C:1	4G:12, 5G:3, 6G:2
Chordata	Aves	Gruiformes	Rallidae	Coturnicops	Coturnicops exquisitus	AP010823.1	17136	4A:97, 5A:39, 6A:8, 7A:6	4T:36, 5T:8, 6T:4, 7T:1, 8T:1	4C:60, 5C:17, 6C:6, 7C:1, 9C:1, 12C:1, 13C:1	4G:8, 5G:1, 6G:2, 7G:1
Arthropoda	Insecta	Coleoptera	Hydroscaphidae	Hydroscapha	Hydroscapha granulum	AM493667.2	15975	4A:148, 5A:73, 6A:40, 7A:17, 8A:4, 9A:7, 10A:1	4T:150, 5T:75, 6T:31, 7T:17, 8T:10, 9T:1, 11T:1, 19T:1	4C:18, 5C:7, 6C:2	4G:9, 5G:3
Arthropoda	Insecta	Coleoptera	Aspidytidae	Aspidytes	Aspidytes niobe	NC_012139.1	14257	4A:134, 5A:57, 6A:31, 7A:19, 8A:6, 9A:1, 10A:1, 12A:1, 13A:1	4T:111, 5T:51, 6T:22, 7T:10, 8T:5, 10T:1	4C:7, 5C:5, 6C:2, 7C:1	4G:9, 5G:4
Arthropoda	Arachnida	Sarcoptiformes	Pyroglyphidae	Dermatophagoides	Dermatophagoides pteronyssinus	NC_012218.1	14203	4A:63, 5A:42, 6A:13, 7A:2, 8A:1, 9A:1	4T:201, 5T:116, 6T:49, 7T:25, 8T:6, 9T:7, 10T:2	4C:8, 5C:3, 6C:1	4G:40, 5G:14, 6G:2
Chordata	Lepidosauria	Squamata	Phyllodactylidae	Tarentola	Tarentola mauritanica	NC_012366.1	16593	4A:67, 5A:23, 6A:5, 7A:3, 9A:2	4T:62, 5T:8, 6T:2, 7T:1	4C:71, 5C:28, 6C:6, 7C:1, 11C:1	4G:18, 5G:6, 6G:1
Chordata	Lepidosauria	Squamata	Blanidae	Blanus	Blanus cinereus	NC_012433.1	16969	4A:92, 5A:31, 6A:6, 7A:6, 8A:1, 9A:2	4T:30, 5T:19, 6T:5, 7T:2, 8T:1	4C:53, 5C:12, 6C:6, 7C:3, 8C:3	4G:10, 5G:4, 6G:1, 7G:2
Arthropoda	Insecta	Hemiptera	Geocoridae	Geocoris	Geocoris pallidipennis	NC_012424.1	14592	4A:136, 5A:67, 6A:33, 7A:12, 8A:8, 9A:3, 10A:1	4T:88, 5T:33, 6T:7, 7T:2, 8T:1	4C:8, 5C:3	4G:3
Mollusca	Gastropoda	Ellobiida	Ellobiidae	Myosotella	Myosotella myosotis	NC_012434.1	14246	4A:46, 5A:13, 6A:7, 7A:2	4T:106, 5T:32, 6T:12, 7T:6, 8T:1	4C:24, 5C:6, 6C:3	4G:40, 5G:18, 6G:7, 7G:2, 8G:1
Arthropoda	Insecta	Hymenoptera	Bethylidae	Cephalonomia	Cephalonomia gallicola	FJ823227.1	16720	4A:173, 5A:96, 6A:32, 7A:18, 8A:10, 9A:4, 10A:3, 11A:2, 12A:1, 13A:1, 23A:1	4T:179, 5T:64, 6T:25, 7T:11, 8T:3, 9T:1	4C:5	4G:2, 5G:1
Arthropoda	Insecta	Hemiptera	Rhopalidae	Aeschyntelus	Aeschyntelus notatus	NC_012446.1	14532	4A:163, 5A:78, 6A:31, 7A:17, 8A:4, 10A:1	4T:76, 5T:24, 6T:13, 7T:6	4C:17, 5C:7, 6C:2	4G:13, 5G:4
Chordata	Lepidosauria	Squamata	Chamaeleonidae	Chamaeleo	Chamaeleo calcaricarens	NC_012452.1	17451	4A:109, 5A:61, 6A:23, 7A:11, 8A:2, 9A:3	4T:52, 5T:20, 6T:11, 7T:6, 8T:2, 9T:1, 10T:1	4C:39, 5C:16, 6C:4, 7C:3, 8C:2	4G:11, 5G:9, 6G:2, 8G:1
Arthropoda	Insecta	Hemiptera	Coreidae	Hydaropsis	Hydaropsis longirostris	NC_012456.1	16521	4A:200, 5A:95, 6A:36, 7A:11, 8A:7, 9A:2, 10A:1	4T:94, 5T:36, 6T:16, 7T:5, 8T:2	4C:24, 5C:11, 6C:1	4G:5, 5G:2
Arthropoda	Insecta	Hemiptera	Cydnidae	Macroscytus	Macroscytus gibbulus	NC_012457.1	14620	4A:122, 5A:53, 6A:18, 7A:4, 8A:4, 9A:1	4T:65, 5T:22, 6T:5, 7T:1	4C:21, 5C:7, 6C:1	4G:11, 5G:3, 6G:1
Arthropoda	Insecta	Hemiptera	Malcidae	Malcus	Malcus inconspicuus	NC_012458.1	15575	4A:179, 5A:93, 6A:40, 7A:14, 8A:8, 9A:3	4T:92, 5T:32, 6T:11, 7T:3, 8T:1	4C:14, 5C:5, 6C:1	4G:3
Arthropoda	Insecta	Hemiptera	Colobathristidae	Phaenacantha	Phaenacantha marcida	NC_012460.1	14540	4A:167, 5A:72, 6A:29, 7A:25, 8A:3, 9A:4	4T:42, 5T:21, 6T:5, 8T:2	4C:30, 5C:8, 6C:5	4G:7, 5G:3, 6G:1
Arthropoda	Insecta	Hemiptera	Alydidae	Riptortus	Riptortus pedestris	NC_012462.1	17191	4A:181, 5A:79, 6A:39, 7A:35, 8A:9, 9A:4, 10A:2	4T:124, 5T:39, 6T:14, 7T:3, 8T:2, 9T:1, 11T:2	4C:11, 5C:7, 6C:1	4G:2, 5G:1
Arthropoda	Insecta	Hemiptera	Berytidae	Yemmalysus	Yemmalysus parallelus	NC_012464.1	15747	4A:156, 5A:69, 6A:31, 7A:15, 8A:2, 9A:3	4T:109, 5T:42, 6T:16, 7T:4, 8T:3, 9T:1, 10T:1	4C:17, 5C:1, 6C:2	4G:10, 5G:1
Arthropoda	Arachnida	Trombidiformes	Tetranychidae	Panonychus	Panonychus ulmi	NC_012571.1	13115	4A:137, 5A:68, 6A:33, 7A:19, 8A:5, 9A:5, 10A:2, 11A:1, 12A:1, 13A:2, 15A:1	4T:172, 5T:87, 6T:42, 7T:24, 8T:16, 9T:12, 10T:5, 11T:3, 12T:6, 13T:1, 14T:1, 15T:1, 19T:1, 20T:1, 22T:1	4C:2, 5C:1, 6C:1	4G:7, 5G:2
Arthropoda	Malacostraca	Decapoda	Portunidae	Scylla	Scylla tranquebarica	NC_012567.1	15833	4A:113, 5A:51, 6A:16, 7A:8, 8A:2, 9A:4, 10A:1	4T:146, 5T:59, 6T:18, 7T:11, 8T:5, 9T:1, 10T:1	4C:20, 5C:4, 6C:1	4G:4, 5G:1
Arthropoda	Insecta	Hemiptera	Flatidae	Geisha	Geisha distinctissima	NC_012617.1	15971	4A:196, 5A:86, 6A:54, 7A:33, 8A:34, 9A:13, 10A:13, 11A:3, 12A:2, 13A:2, 14A:1, 15A:1, 16A:3, 23A:1, 24A:1, 26A:1, 30A:1	4T:79, 5T:19, 6T:6, 8T:2	4C:32, 5C:10, 6C:5, 9C:1	4G:4
Chordata	Actinopteri	Istiophoriformes	Istiophoridae	Tetrapturus	Tetrapturus angustirostris	AB470303.1	16509	4A:62, 5A:27, 6A:3, 7A:2, 8A:1	4T:35, 5T:11, 6T:3	4C:89, 5C:36, 6C:14	4G:15, 5G:5
Chordata	Actinopteri	Istiophoriformes	Istiophoridae	Makaira	Makaira mazara	AB470304.1	16534	4A:60, 5A:27, 6A:5, 7A:2, 8A:1	4T:31, 5T:16	4C:85, 5C:42, 6C:11	4G:16, 5G:8
Chordata	Mammalia	Perissodactyla	Rhinocerotidae	Coelodonta	Coelodonta antiquitatis	NC_012681.1	16436	4A:86, 5A:39, 6A:8, 7A:4	4T:28, 5T:11, 6T:1	4C:55, 5C:13, 6C:1	4G:4, 5G:3
Chordata	Mammalia	Perissodactyla	Rhinocerotidae	Diceros	Diceros bicornis	NC_012682.1	16411	4A:92, 5A:37, 6A:7, 7A:4	4T:35, 5T:12, 6T:1	4C:63, 5C:18, 6C:1	4G:6, 5G:2
Chordata	Mammalia	Perissodactyla	Rhinocerotidae	Dicerorhinus	Dicerorhinus sumatrensis	NC_012684.1	16466	4A:87, 5A:40, 6A:7, 7A:3	4T:33, 5T:6, 6T:1	4C:71, 5C:13, 6C:4	4G:6, 5G:3, 6G:1
Annelida	Polychaeta	Terebellida	Pectinariidae	Pectinaria	Pectinaria gouldii	FJ976040.1	13438	4A:52, 5A:22, 6A:5, 7A:1	4T:95, 5T:24, 6T:11, 7T:5, 8T:3, 9T:1	4C:42, 5C:17, 7C:1	4G:25, 5G:8, 6G:5
Annelida	Polychaeta	Terebellida	Ampharetidae	Auchenoplax	Auchenoplax crinita	FJ976041.1	13759	4A:63, 5A:17, 6A:3, 7A:1	4T:166, 5T:53, 6T:31, 7T:10, 8T:4, 9T:3, 10T:2, 16T:1	4C:6	4G:34, 5G:4, 6G:4, 7G:2
Arthropoda	Insecta	Hymenoptera	Orussidae	Orussus	Orussus occidentalis	NC_012689.1	15947	4A:107, 5A:47, 6A:22, 7A:15, 8A:8, 9A:5, 12A:1, 20A:1, 27A:1	4T:114, 5T:36, 6T:16, 7T:5, 8T:1	4C:23, 5C:3, 6C:2	4G:1
Platyhelminthes	Trematoda	Opisthorchiida	Opisthorchiidae	Clonorchis	Clonorchis sinensis	NC_012147.2	13875	4A:6, 5A:5, 7A:1	4T:150, 5T:67, 6T:30, 7T:18, 8T:13, 9T:4, 10T:2	4C:6, 5C:4, 11C:1	4G:66, 5G:35, 6G:5, 7G:2, 9G:1
Chordata	Actinopteri	Osteoglossiformes	Notopteridae	Chitala	Chitala ornata	AP008923.1	16164	4A:83, 5A:27, 6A:9, 7A:2	4T:33, 5T:8, 6T:2, 7T:3	4C:60, 5C:16, 6C:4	4G:8, 5G:2
Chordata	Actinopteri	Osteoglossiformes	Notopteridae	Notopterus	Notopterus notopterus	AP008925.1	15854	4A:84, 5A:31, 6A:10, 7A:2	4T:45, 5T:9, 6T:1, 7T:1	4C:61, 5C:9, 6C:5, 9C:1	4G:7, 5G:5, 6G:1
Chordata	Actinopteri	Osteoglossiformes	Notopteridae	Papyrocranus	Papyrocranus congoensis	AP008926.1	16823	4A:86, 5A:35, 6A:9, 7A:1	4T:51, 5T:11, 6T:1, 7T:1	4C:64, 5C:22, 6C:4, 7C:2	4G:12, 5G:3, 6G:1
Arthropoda	Insecta	Hymenoptera	Ichneumonidae	Diadegma	Diadegma semiclausum	NC_012708.1	18728	4A:257, 5A:110, 6A:32, 7A:23, 8A:17, 9A:5, 10A:5, 11A:1, 13A:1, 15A:1	4T:270, 5T:98, 6T:36, 7T:28, 8T:10, 9T:5, 11T:3	4C:7, 5C:6, 6C:1	5G:2, 6G:1
Chordata	Actinopteri	Perciformes	Serranidae	Anyperodon	Anyperodon leucogrammicus	NC_012709.1	16616	4A:58, 5A:27, 6A:8, 7A:2	4T:55, 5T:16, 6T:3, 7T:2, 8T:1	4C:70, 5C:40, 6C:9, 7C:2, 8C:1	4G:16, 5G:8, 6G:4
Mollusca	Bivalvia	Unionida	Unionidae	Cristaria	Cristaria plicata	NC_012716.1	15712	4A:136, 5A:62, 6A:26, 7A:11, 8A:5, 11A:1	4T:72, 5T:31, 6T:10, 7T:5, 9T:1	4C:49, 5C:19, 6C:4, 7C:2, 8C:2	4G:13, 5G:3
Arthropoda	Insecta	Lepidoptera	Saturniidae	Eriogyna	Eriogyna pyretorum	NC_012727.1	15327	4A:148, 5A:50, 6A:33, 7A:17, 8A:3, 9A:2, 10A:2, 11A:1, 12A:1, 16A:1	4T:167, 5T:67, 6T:43, 7T:25, 8T:12, 9T:5, 10T:2, 19T:1	4C:13, 5C:10, 6C:1, 7C:1	4G:3, 5G:3
Chordata	Lepidosauria	Squamata	Aniliidae	Anilius	Anilius scytale	GQ200593.1	15281	4A:98, 5A:32, 6A:11, 7A:8, 8A:1, 10A:1	4T:38, 5T:12, 6T:1, 7T:1	4C:39, 5C:16, 6C:7, 7C:3, 8C:2, 9C:1	4G:12, 5G:2
Chordata	Lepidosauria	Squamata	Uropeltidae	Rhinophis	Rhinophis philippinus	GQ200594.1	15232	4A:74, 5A:32, 6A:11, 7A:7, 8A:1	4T:45, 5T:11, 6T:4	4C:41, 5C:9, 6C:1, 7C:3, 10C:2	4G:11, 5G:1
Chordata	Mammalia	Primates	Daubentoniidae	Daubentonia	Daubentonia madagascariensis	AB371085.1	16648	4A:90, 5A:36, 6A:5, 7A:4	4T:37, 5T:15, 6T:4	4C:83, 5C:28, 6C:10, 12C:1	4G:11, 5G:2, 6G:1
Chordata	Mammalia	Primates	Lemuridae	Eulemur	Eulemur macaco	AB371088.1	17149	4A:85, 5A:26, 6A:7, 7A:3, 9A:1	4T:48, 5T:13, 6T:4, 7T:2	4C:50, 5C:16, 6C:4, 7C:1	4G:7, 5G:1
Chordata	Mammalia	Primates	Lemuridae	Varecia	Varecia variegata	AB371089.1	16965	4A:97, 5A:30, 6A:9, 7A:5	4T:59, 5T:13, 6T:4	4C:56, 5C:15, 6C:2, 7C:1	4G:8, 5G:6
Chordata	Mammalia	Primates	Tarsiidae	Carlito	Carlito syrichta	AB371090.1	17004	4A:72, 5A:31, 6A:7, 7A:3, 8A:1	4T:54, 5T:14, 6T:5	4C:58, 5C:26, 6C:2	4G:3, 5G:4, 8G:1
Chordata	Mammalia	Primates	Cebidae	Saimiri	Saimiri sciureus	AB371091.1	16474	4A:76, 5A:26, 6A:9, 7A:3, 8A:1	4T:34, 5T:8, 6T:3	4C:55, 5C:21, 6C:4	4G:8, 5G:2, 9G:1
Chordata	Mammalia	Primates	Galagidae	Galago	Galago senegalensis	AB371092.1	16795	4A:71, 5A:29, 6A:9, 7A:2, 8A:1	4T:37, 5T:7, 6T:2, 8T:1, 10T:1	4C:68, 5C:19, 6C:8, 7C:2	4G:4, 5G:3
Chordata	Mammalia	Primates	Galagidae	Otolemur	Otolemur crassicaudatus	AB371093.1	16827	4A:71, 5A:28, 6A:7, 7A:2, 8A:1	4T:31, 5T:4, 6T:2	4C:62, 5C:25, 6C:7, 7C:1, 14C:1	4G:6, 5G:9
Chordata	Mammalia	Primates	Lorisidae	Loris	Loris tardigradus	AB371094.1	16776	4A:87, 5A:41, 6A:6, 7A:2, 8A:3	4T:52, 5T:11, 6T:2, 7T:2	4C:48, 5C:26, 6C:6, 7C:1	4G:4, 5G:5, 6G:1
Chordata	Mammalia	Primates	Lorisidae	Perodicticus	Perodicticus potto	AB371095.1	16638	4A:89, 5A:31, 6A:6, 7A:3, 8A:1	4T:30, 5T:3, 6T:1, 7T:2	4C:68, 5C:18, 6C:7, 7C:1, 8C:1, 10C:1, 11C:1	4G:11, 5G:4
Annelida	Polychaeta	Xenopneusta	Urechidae	Urechis	Urechis unicinctus	NC_012768.1	15761	4A:82, 5A:46, 6A:9, 8A:1, 9A:1	4T:105, 5T:24, 6T:12, 7T:2, 8T:1, 10T:1	4C:42, 5C:28, 6C:2, 11C:1	4G:28, 5G:4, 6G:3, 7G:1, 11G:1
Chordata	Lepidosauria	Squamata	Iguanidae	Oplurus	Oplurus grandidieri	AB218720.1	17122	4A:108, 5A:46, 6A:9, 7A:6	4T:57, 5T:19, 6T:12, 7T:4	4C:47, 5C:9, 6C:5	4G:4, 6G:1
Chordata	Lepidosauria	Squamata	Iguanidae	Basiliscus	Basiliscus vittatus	AB218883.1	16948	4A:99, 5A:36, 6A:8, 7A:6, 9A:1, 10A:1	4T:40, 5T:20, 6T:12, 7T:1, 8T:2	4C:56, 5C:19, 6C:2, 7C:1	4G:21, 5G:6
Chordata	Lepidosauria	Squamata	Iguanidae	Gambelia	Gambelia wislizenii	AB218884.1	17563	4A:103, 5A:37, 6A:12, 7A:4, 9A:1	4T:59, 5T:37, 6T:8, 7T:1	4C:76, 5C:18, 6C:4	4G:30, 5G:8, 7G:1
Chordata	Lepidosauria	Squamata	Dactyloidae	Anolis	Anolis cybotes	AB218960.1	17853	4A:115, 5A:55, 6A:11, 7A:6, 8A:2	4T:95, 5T:50, 6T:17, 7T:9, 8T:2	4C:39, 5C:23, 6C:3, 7C:1, 10C:1	4G:35, 5G:4, 6G:1
Chordata	Lepidosauria	Squamata	Iguanidae	Plica	Plica plica	AB218961.1	17643	4A:125, 5A:52, 6A:8, 7A:6, 8A:1	4T:63, 5T:25, 6T:20, 7T:2, 8T:1	4C:48, 5C:35, 6C:8, 7C:1, 8C:1, 9C:1	4G:9, 5G:5
Chordata	Lepidosauria	Squamata	Iguanidae	Leiocephalus	Leiocephalus personatus	AB266739.1	16681	4A:90, 5A:37, 6A:8, 7A:6, 8A:1, 9A:1, 10A:1	4T:60, 5T:22, 6T:7, 7T:4	4C:57, 5C:9, 6C:5	4G:12, 5G:3, 6G:1
Chordata	Lepidosauria	Squamata	Iguanidae	Chalarodon	Chalarodon madagascariensis	AB266748.1	16851	4A:89, 5A:45, 6A:6, 7A:5, 8A:1, 10A:1	4T:64, 5T:27, 6T:5, 7T:4, 8T:1, 9T:1	4C:49, 5C:13, 6C:4, 8C:1	4G:10, 5G:3, 6G:1
Chordata	Lepidosauria	Squamata	Polychrotidae	Polychrus	Polychrus marmoratus	AB266749.1	17743	4A:92, 5A:41, 6A:7, 7A:2	4T:58, 5T:16, 6T:12, 7T:3, 8T:1	4C:70, 5C:44, 6C:18, 7C:3, 8C:1	4G:15, 5G:4, 6G:1, 9G:1
Arthropoda	Arachnida	Mesostigmata	Phytoseiidae	Phytoseiulus	Phytoseiulus persimilis	GQ222414.1	16199	4A:155, 5A:67, 6A:26, 7A:10, 8A:4, 9A:1	4T:220, 5T:100, 6T:30, 7T:13, 8T:4, 9T:5, 11T:1	4C:2, 5C:4	4G:19, 5G:2, 6G:1, 7G:1
Arthropoda	Insecta	Hemiptera	Nepidae	Laccotrephes	Laccotrephes robustus	NC_012817.1	15321	4A:163, 5A:71, 6A:34, 7A:26, 8A:10, 9A:3, 10A:2, 11A:1	4T:48, 5T:11, 8T:1	4C:27, 5C:17, 6C:2, 8C:1	4G:12, 5G:3, 7G:1
Arthropoda	Insecta	Hemiptera	Notonectidae	Enithares	Enithares tibialis	NC_012819.1	15262	4A:157, 5A:82, 6A:35, 7A:22, 8A:11, 9A:1	4T:74, 5T:30, 6T:6, 7T:2, 8T:2, 9T:1	4C:7, 5C:3, 6C:1, 7C:1	4G:2, 7G:1
Arthropoda	Insecta	Hemiptera	Helotrephidae	Helotrephes	Helotrephes sp.	NC_012822.1	15130	4A:170, 5A:82, 6A:35, 7A:19, 8A:7, 9A:5	4T:105, 5T:35, 6T:4, 7T:6	4C:11, 5C:7, 6C:2, 7C:1	4G:8, 5G:2, 8G:1
Arthropoda	Insecta	Hemiptera	Reduviidae	Valentia	Valentia hoffmanni	NC_012823.1	15625	4A:152, 5A:76, 6A:32, 7A:20, 8A:7, 9A:1	4T:83, 5T:30, 6T:10, 7T:10	4C:26, 5C:5	4G:9, 5G:2, 6G:1
Arthropoda	Insecta	Hemiptera	Gerridae	Aquarius	Aquarius paludum	NC_012841.1	15380	4A:185, 5A:75, 6A:58, 7A:25, 8A:16, 9A:7, 10A:1	4T:89, 5T:31, 6T:7, 7T:4	4C:14, 5C:4, 6C:3, 7C:1	4G:5, 6G:1, 7G:2
Arthropoda	Insecta	Hemiptera	Hydrometridae	Hydrometra	Hydrometra greeni	NC_012842.1	15416	4A:165, 5A:72, 6A:30, 7A:32, 8A:8, 9A:4, 10A:2	4T:104, 5T:31, 6T:12, 7T:8, 8T:4, 10T:1	4C:13, 5C:2, 6C:2, 9C:1	4G:13, 5G:3, 7G:1
Chordata	Aves	Anseriformes	Anatidae	Dendrocygna	Dendrocygna javanica	NC_012844.1	16753	4A:74, 5A:26, 6A:8, 7A:1	4T:28, 5T:6, 6T:2	4C:75, 5C:23, 6C:11, 7C:3, 8C:2, 10C:1	4G:21, 5G:5
Arthropoda	Insecta	Hemiptera	Naucoridae	Ilyocoris	Ilyocoris cimicoides	NC_012845.1	15209	4A:153, 5A:82, 6A:35, 7A:12, 8A:2, 9A:1	4T:56, 5T:18, 6T:4, 7T:2, 8T:2	4C:26, 5C:8, 6C:3	4G:13, 5G:1, 6G:3, 7G:1, 8G:1
Arthropoda	Insecta	Hemiptera	Gelastocoridae	Nerthra	Nerthra indica	NC_012838.1	16079	4A:176, 5A:79, 6A:40, 7A:25, 8A:10, 9A:6, 10A:4	4T:75, 5T:22, 6T:10, 7T:3, 8T:1	4C:26, 5C:5, 6C:4, 8C:1	4G:10, 5G:5
Arthropoda	Insecta	Hemiptera	Rhopalidae	Stictopleurus	Stictopleurus subviridis	NC_012888.1	15319	4A:179, 5A:70, 6A:31, 7A:16, 8A:4, 9A:2	4T:91, 5T:28, 6T:10, 8T:1	4C:17, 5C:4, 6C:4	4G:6, 5G:1
Arthropoda	Malacostraca	Amphipoda	Metacrangonyctidae	Metacrangonyx	Metacrangonyx longipes	AM944817.1	14113	4A:119, 5A:50, 6A:27, 7A:13, 8A:7, 9A:2, 10A:2, 15A:2	4T:140, 5T:59, 6T:29, 7T:13, 8T:7, 9T:3, 10T:1, 13T:1, 15T:1	4C:13, 5C:3	4G:11
Arthropoda	Insecta	Diptera	Cecidomyiidae	Asphondylia	Asphondylia rosetta	GQ387650.1	11938	4A:133, 5A:56, 6A:29, 7A:18, 8A:8, 9A:3, 10A:2, 11A:2, 26A:1	4T:136, 5T:61, 6T:27, 7T:10, 8T:8, 9T:4, 10T:1	4C:8, 5C:1
Arthropoda	Insecta	Diptera	Cecidomyiidae	Rhopalomyia	Rhopalomyia pomum	GQ387649.1	14503	4A:153, 5A:84, 6A:32, 7A:16, 8A:16, 9A:6, 10A:5, 11A:2, 16A:1, 18A:2, 19A:1	4T:154, 5T:70, 6T:30, 7T:14, 8T:13, 9T:3, 10T:2, 11T:2, 18T:2	4C:3, 5C:5, 6C:1	5G:1
Arthropoda	Insecta	Diptera	Cecidomyiidae	Mayetiola	Mayetiola destructor	GQ387648.1	14759	4A:151, 5A:86, 6A:37, 7A:29, 8A:12, 9A:9, 10A:6, 11A:4, 12A:2, 15A:1	4T:137, 5T:60, 6T:29, 7T:10, 8T:8, 9T:5, 10T:3, 11T:1, 12T:1, 14T:1	4C:7, 5C:2, 7C:2	4G:1
Chordata	Actinopteri	Cypriniformes	Catostomidae	Moxostoma	Moxostoma congestum	AP009317.1	16626	4A:68, 5A:22, 6A:3, 7A:2	4T:64, 5T:20, 6T:6, 7T:2	4C:60, 5C:27, 6C:7, 7C:1	4G:23, 5G:11, 6G:4
Chordata	Actinopteri	Cypriniformes	Catostomidae	Erimyzon	Erimyzon oblongus	AP011228.1	16627	4A:58, 5A:23, 6A:1, 7A:1	4T:71, 5T:10, 6T:6, 7T:1, 9T:1	4C:62, 5C:23, 6C:6	4G:19, 5G:11, 6G:5
Chordata	Amphibia	Caudata	Amphiumidae	Amphiuma	Amphiuma means	GQ368656.1	16973	4A:112, 5A:40, 6A:8, 7A:5, 9A:1, 10A:1	4T:83, 5T:28, 6T:3, 7T:8, 8T:1, 9T:1	4C:37, 5C:9, 6C:1	4G:23, 5G:3
Chordata	Amphibia	Caudata	Sirenidae	Pseudobranchus	Pseudobranchus axanthus	GQ368660.1	16009	4A:84, 5A:41, 6A:11, 7A:4, 8A:1	4T:91, 5T:26, 6T:18, 7T:5, 8T:1	4C:31, 5C:10, 6C:4, 7C:3, 10C:1	4G:14, 5G:4, 6G:1, 7G:1, 12G:1, 13G:1
Chordata	Amphibia	Caudata	Sirenidae	Siren	Siren intermedia	GQ368661.1	16050	4A:80, 5A:37, 6A:14, 7A:1, 8A:3, 27A:1	4T:98, 5T:29, 6T:12, 7T:5, 8T:1, 9T:1, 22T:1	4C:33, 5C:9, 6C:4, 7C:1, 12C:1	4G:8, 5G:4, 6G:2, 13G:1
Chordata	Amphibia	Caudata	Dicamptodontidae	Dicamptodon	Dicamptodon aterrimus	GQ368657.1	17264	4A:114, 5A:39, 6A:14, 7A:4, 8A:2	4T:131, 5T:42, 6T:17, 7T:4, 8T:3, 12T:1	4C:34, 5C:11, 6C:2	4G:14, 5G:2, 6G:1, 7G:1
Chordata	Amphibia	Caudata	Cryptobranchidae	Cryptobranchus	Cryptobranchus alleganiensis	GQ368662.1	16309	4A:80, 5A:36, 6A:13, 7A:6, 8A:2	4T:115, 5T:37, 6T:15, 7T:4, 8T:5, 12T:1	4C:24, 5C:8, 6C:2	4G:15, 5G:1
Chordata	Mammalia	Rodentia	Cricetidae	Tscherskia	Tscherskia triton	NC_013068.1	16488	4A:69, 5A:31, 6A:6, 7A:2	4T:68, 5T:14, 6T:6, 7T:1	4C:52, 5C:22, 6C:5	4G:14, 5G:5, 6G:3
Arthropoda	Insecta	Coleoptera	Cerambycidae	Psacothea	Psacothea hilaris	NC_013070.1	15856	4A:156, 5A:68, 6A:26, 7A:12, 8A:5, 9A:4, 10A:3, 13A:1	4T:153, 5T:51, 6T:22, 7T:10, 8T:7, 9T:4, 12T:1	4C:28, 5C:6, 6C:2, 7C:1	4G:2
Chordata	Actinopteri	Scombriformes	Nomeidae	Cubiceps	Cubiceps pauciradiatus	AP006038.1	16522	4A:71, 5A:20, 6A:6	4T:57, 5T:16, 6T:2, 7T:2	4C:95, 5C:29, 6C:8	4G:17, 5G:5
Chordata	Actinopteri	Ephippiformes	Ephippidae	Platax	Platax orbicularis	AP006825.1	16561	4A:75, 5A:28, 6A:4, 7A:1	4T:32, 5T:7, 6T:1	4C:91, 5C:49, 6C:14	4G:18, 5G:9, 6G:1
Chordata	Actinopteri	Centrarchiformes	Girellidae	Girella	Girella punctata	AP011060.1	16518	4A:68, 5A:28, 6A:6, 8A:1	4T:44, 5T:10, 6T:4, 8T:1	4C:80, 5C:29, 6C:12	4G:13, 5G:9, 6G:1
Chordata	Actinopteri	Centrarchiformes	Kyphosidae	Kyphosus	Kyphosus cinerascens	AP011061.1	16534	4A:70, 5A:27, 6A:5, 7A:2	4T:36, 5T:17, 6T:2	4C:75, 5C:41, 6C:10	4G:18, 5G:6
Chordata	Actinopteri	Centrarchiformes	Kyphosidae	Scorpis	Scorpis lineolata	AP011063.1	16501	4A:60, 5A:23, 6A:6	4T:47, 5T:11, 6T:2, 7T:1, 11T:1	4C:91, 5C:50, 6C:11	4G:20, 5G:10, 6G:2
Chordata	Actinopteri	Centrarchiformes	Kuhliidae	Kuhlia	Kuhlia mugil	AP011065.1	16502	4A:58, 5A:24, 6A:6, 7A:2	4T:35, 5T:11, 6T:4	4C:71, 5C:46, 6C:9, 7C:3	4G:23, 5G:7, 6G:1
Chordata	Actinopteri	Scombriformes	Nomeidae	Psenes	Psenes cyanophrys	AP011067.1	16500	4A:66, 5A:20, 6A:5, 7A:1	4T:63, 5T:18, 6T:4, 7T:1, 11T:1	4C:80, 5C:27, 6C:8	4G:22, 5G:6, 7G:1
Chordata	Actinopteri	Centrarchiformes	Enoplosidae	Enoplosus	Enoplosus armatus	AP006008.1	16508	4A:63, 5A:21, 6A:5, 7A:2, 8A:1	4T:79, 5T:25, 6T:7, 7T:2, 11T:1	4C:66, 5C:32, 6C:8, 7C:3	4G:19, 5G:10, 6G:1
Chordata	Actinopteri	Centrarchiformes	Kyphosidae	Microcanthus	Microcanthus strigatus	AP006009.1	16531	4A:73, 5A:19, 6A:7, 7A:3	4T:40, 5T:10, 6T:1, 11T:1	4C:73, 5C:40, 6C:8	4G:21, 5G:9, 6G:2
Chordata	Actinopteri	Centrarchiformes	Oplegnathidae	Oplegnathus	Oplegnathus fasciatus	AP006010.1	16513	4A:71, 5A:27, 6A:5, 7A:1	4T:38, 5T:15, 6T:6, 7T:1	4C:83, 5C:44, 6C:11	4G:12, 5G:6
Nematoda	Chromadorea	Rhabditida	Pratylenchidae	Radopholus	Radopholus similis	FN313571.1	16791	4A:101, 5A:33, 6A:19, 7A:9, 8A:2, 9A:2, 10A:1	4T:305, 5T:166, 6T:71, 7T:60, 8T:39, 9T:30, 10T:17, 11T:8, 12T:3, 13T:4	6C:1	4G:2, 6G:1
Arthropoda	Insecta	Hymenoptera	Evaniidae	Evania	Evania appendigaster	NC_013238.1	17817	4A:178, 5A:60, 6A:30, 7A:14, 8A:7, 9A:4, 10A:2, 11A:1, 14A:1	4T:140, 5T:53, 6T:22, 7T:5, 8T:1, 9T:2, 10T:2, 11T:1	4C:21, 5C:21, 6C:7, 8C:2	4G:8, 5G:3, 6G:1, 7G:1
Mollusca	Gastropoda	Neogastropoda	Terebridae	Oxymeris	Oxymeris dimidiata	NC_013239.1	16513	4A:59, 5A:21, 6A:10	4T:186, 5T:69, 6T:33, 7T:18, 8T:7	4C:8, 5C:1, 9C:1	4G:35, 5G:9, 6G:2
Arthropoda	Insecta	Orthoptera	Acrididae	Schistocerca	Schistocerca gregaria	NC_013240.1	15625	4A:157, 5A:63, 6A:27, 7A:13, 8A:6, 9A:3, 11A:1	4T:60, 5T:27, 6T:5, 8T:2	4C:10, 5C:2	4G:9, 5G:2
Mollusca	Gastropoda	Neogastropoda	Cancellariidae	Bivetiella	Bivetiella cancellata	NC_013241.1	16648	4A:66, 5A:25, 6A:11, 7A:5, 8A:3	4T:205, 5T:71, 6T:32, 7T:19, 8T:5, 9T:2, 10T:1	4C:5	4G:27, 5G:4, 6G:1
Mollusca	Gastropoda	Neogastropoda	Turridae	Fusiturris	Fusiturris similis	NC_013242.1	15595	4A:80, 5A:34, 6A:9, 7A:2, 8A:2	4T:164, 5T:58, 6T:23, 7T:8, 8T:6, 9T:2	4C:14, 5C:2, 6C:1	4G:28, 5G:7, 6G:4
Mollusca	Gastropoda	Neogastropoda	Volutidae	Cymbium	Cymbium olla	NC_013245.1	15375	4A:66, 5A:24, 6A:4, 7A:2	4T:173, 5T:66, 6T:34, 7T:8, 8T:5	4C:5, 5C:5	4G:22, 5G:3, 6G:1
Mollusca	Gastropoda	Littorinimorpha	Ranellidae	Monoplex	Monoplex parthenopeus	NC_013247.1	15270	4A:71, 5A:24, 6A:8, 7A:4, 8A:2	4T:160, 5T:59, 6T:25, 7T:10, 8T:8	4C:7	4G:21, 5G:3, 6G:3
Arthropoda	Insecta	Coleoptera	Gyrinidae	Macrogyrus	Macrogyrus oblongus	NC_013249.1	16643	4A:156, 5A:74, 6A:29, 7A:11, 8A:10, 9A:1, 10A:7, 11A:1	4T:142, 5T:55, 6T:20, 7T:10, 8T:6, 9T:4, 10T:1, 11T:1, 14T:1, 17T:1	4C:22, 5C:10, 6C:2	4G:11, 5G:2, 7G:1
Arthropoda	Insecta	Raphidioptera	Raphidiidae	Mongoloraphidia	Mongoloraphidia harmandi	NC_013251.1	16006	4A:175, 5A:90, 6A:29, 7A:19, 8A:5, 9A:4, 10A:1, 11A:2	4T:153, 5T:85, 6T:28, 7T:18, 8T:5, 9T:4, 11T:1, 14T:1	4C:13, 5C:2	4G:3, 5G:4
Arthropoda	Insecta	Coleoptera	Mordellidae	Mordella	Mordella atrata	NC_013254.1	15540	4A:154, 5A:55, 6A:31, 7A:14, 8A:8, 9A:2, 10A:1	4T:79, 5T:36, 6T:4, 7T:4, 8T:3, 10T:1, 17T:1	4C:30, 5C:10, 6C:4, 7C:1	4G:5, 5G:2, 6G:1
Arthropoda	Insecta	Neuroptera	Mantispidae	Ditaxis	Ditaxis biseriata	NC_013257.1	16416	4A:147, 5A:63, 6A:30, 7A:11, 8A:4, 9A:1	4T:153, 5T:64, 6T:26, 7T:8, 8T:10, 9T:4, 10T:1	4C:8, 5C:3, 6C:1	4G:5, 5G:4, 6G:1
Arthropoda	Insecta	Coleoptera	Scarabaeidae	Rhopaea	Rhopaea magnicornis	NC_013252.1	17522	4A:143, 5A:68, 6A:20, 7A:9, 8A:8, 9A:1, 12A:1	4T:147, 5T:55, 6T:19, 7T:6, 8T:6, 9T:1, 10T:1, 11T:1	4C:23, 5C:10, 6C:2	4G:9, 5G:4, 7G:1
Mollusca	Bivalvia	Lucinida	Lucinidae	Loripes	Loripes lacteus	NC_013271.1	17321	4A:60, 5A:30, 6A:8, 7A:3, 8A:1, 9A:1, 14A:1	4T:155, 5T:57, 6T:29, 7T:11, 8T:2, 9T:3, 15T:1	4C:3, 5C:1	4G:90, 5G:28, 6G:14, 7G:3
Arthropoda	Insecta	Lepidoptera	Crambidae	Diatraea	Diatraea saccharalis	NC_013274.1	15490	4A:151, 5A:53, 6A:28, 7A:15, 8A:7, 9A:1, 10A:1, 11A:3, 13A:1	4T:147, 5T:56, 6T:31, 7T:11, 8T:7, 9T:1, 10T:3, 11T:1, 15T:2	4C:15, 5C:14, 6C:3	4G:6, 5G:2, 6G:1
Chordata	Mammalia	Rodentia	Cricetidae	Mesocricetus	Mesocricetus auratus	NC_013276.1	16264	4A:77, 5A:28, 6A:7, 7A:6	4T:67, 5T:9, 6T:5, 7T:1	4C:34, 5C:15, 6C:6, 7C:1	4G:10, 5G:4
Echinodermata	Holothuroidea	Aspidochirotida	Stichopodidae	Parastichopus	Parastichopus nigripunctatus	AB525762.1	16112	4A:120, 5A:55, 6A:10, 7A:6, 8A:1, 9A:2	4T:102, 5T:49, 6T:17, 7T:6, 8T:1	4C:30, 5C:8	4G:21, 5G:7, 6G:1
Echinodermata	Holothuroidea	Aspidochirotida	Stichopodidae	Apostichopus	Apostichopus japonicus	AB525437.1	16105	4A:123, 5A:51, 6A:10, 7A:6, 8A:2, 9A:1	4T:100, 5T:52, 6T:16, 7T:6, 8T:1	4C:28, 5C:8	4G:17, 5G:3, 6G:1
Arthropoda	Insecta	Hymenoptera	Braconidae	Phanerotoma	Phanerotoma flava	GU097654.1	10171	4A:87, 5A:41, 6A:13, 7A:11, 8A:3, 9A:2, 10A:1, 12A:1	4T:127, 5T:64, 6T:23, 7T:15, 8T:8, 9T:3, 11T:2, 12T:1, 14T:1	5C:1	4G:4, 5G:2, 6G:3
Chordata	Mammalia	Primates	Hominidae	Pan	Pan troglodytes	GU112745.1	16558	4A:70, 5A:29, 6A:9, 7A:7, 8A:1	4T:27, 5T:8, 6T:4, 7T:2	4C:97, 5C:39, 6C:13, 7C:1, 9C:1	4G:8, 5G:2, 6G:1
Chordata	Lepidosauria	Squamata	Elapidae	Micrurus	Micrurus fulvius	NC_013481.1	17506	4A:76, 5A:34, 6A:10, 7A:7, 8A:1, 9A:2	4T:47, 5T:19, 6T:5, 7T:3, 8T:1, 9T:2	4C:64, 5C:27, 6C:3, 7C:1, 8C:3, 9C:2	4G:18, 5G:5, 6G:2, 7G:1
Chordata	Ascidiacea	Stolidobranchia	Pyuridae	Herdmania	Herdmania momus	FN296153.1	15816	4A:51, 5A:8, 6A:3, 7A:1	4T:186, 5T:69, 6T:35, 7T:19, 8T:8, 9T:7, 10T:2, 11T:2, 12T:2, 13T:3	4C:10, 5C:4, 7C:1	4G:69, 5G:29, 6G:12, 7G:3, 9G:1, 10G:1
Chordata	Ascidiacea	Aplousobranchia	Polyclinidae	Aplidium	Aplidium conicum	FN313538.1	15183	4A:61, 5A:40, 6A:6, 7A:4, 8A:4	4T:218, 5T:101, 6T:60, 7T:40, 8T:26, 9T:14, 10T:6, 11T:10, 12T:5, 13T:1	4C:4, 5C:1, 6C:1	4G:8, 5G:4
Chordata	Ascidiacea	Aplousobranchia	Didemnidae	Diplosoma	Diplosoma listerianum	FN313539.1	13648	4A:69, 5A:45, 6A:21, 7A:10, 8A:7, 9A:4, 10A:2, 11A:2, 12A:1	4T:181, 5T:104, 6T:63, 7T:41, 8T:25, 9T:18, 10T:12, 11T:9, 12T:9, 13T:2, 14T:3, 15T:1, 16T:1, 17T:1, 20T:1	4C:4	4G:1, 5G:1
Chordata	Actinopteri	Alepocephaliformes	Alepocephalidae	Alepocephalus	Alepocephalus umbriceps	AP009575.1	16640	4A:73, 5A:18, 6A:8, 7A:1	4T:44, 5T:8, 6T:1, 7T:1	4C:95, 5C:47, 6C:14	4G:29, 5G:9, 6G:5
Chordata	Actinopteri	Alepocephaliformes	Alepocephalidae	Bajacalifornia	Bajacalifornia megalops	AP009578.1	16798	4A:76, 5A:20, 6A:5, 7A:1	4T:39, 5T:12, 6T:1, 8T:1	4C:116, 5C:56, 6C:20	4G:32, 5G:15, 6G:1
Chordata	Actinopteri	Alepocephaliformes	Alepocephalidae	Bathytroctes	Bathytroctes michaelsarsi	AP009579.1	16616	4A:65, 5A:17, 6A:3, 7A:1	4T:42, 5T:11, 6T:1, 7T:1	4C:83, 5C:54, 6C:15, 7C:3	4G:33, 5G:12, 6G:4
Chordata	Actinopteri	Alepocephaliformes	Alepocephalidae	Herwigia	Herwigia kreffti	AP009582.1	16637	4A:62, 5A:16, 6A:6, 7A:1	4T:39, 5T:6, 6T:1, 7T:1	4C:113, 5C:41, 6C:10, 7C:1	4G:27, 5G:11, 6G:1
Chordata	Actinopteri	Alepocephaliformes	Alepocephalidae	Rinoctes	Rinoctes nasutus	AP009586.1	16073	4A:70, 5A:17, 6A:5, 7A:1	4T:50, 5T:13, 6T:5, 7T:2	4C:88, 5C:48, 6C:16, 7C:1	4G:29, 5G:16, 6G:1, 7G:1
Arthropoda	Insecta	Coleoptera	Tenebrionidae	Adelium	Adelium sp.	NC_013554.1	16449	4A:189, 5A:81, 6A:36, 7A:12, 8A:10, 9A:4, 10A:3	4T:73, 5T:30, 6T:6, 7T:5, 10T:1, 22T:1	4C:13, 5C:4, 9C:1	4G:6, 6G:1
Chordata	Mammalia	Artiodactyla	Camelidae	Vicugna	Vicugna vicugna	NC_013558.1	16084	4A:79, 5A:30, 6A:9, 7A:4, 8A:1, 9A:1	4T:46, 5T:13, 6T:5	4C:62, 5C:22, 6C:5	4G:14, 5G:5, 9G:1
Rotifera	Eurotatoria	Philodinida	Philodinidae	Rotaria	Rotaria rotatoria	NC_013568.1	15319	4A:65, 5A:14, 6A:5, 7A:2, 8A:1, 12A:1, 37A:1	4T:219, 5T:89, 6T:52, 7T:14, 8T:5, 9T:2	4C:2, 5C:3, 7C:1	4G:13, 5G:5, 6G:1, 8G:1
Arthropoda	Insecta	Coleoptera	Cantharidae	Chauliognathus	Chauliognathus opacus	NC_013576.1	14893	4A:171, 5A:77, 6A:35, 7A:20, 8A:8, 9A:6, 10A:3	4T:114, 5T:35, 6T:7, 7T:3, 8T:1	4C:11, 5C:3	4G:2
Arthropoda	Insecta	Coleoptera	Buprestidae	Acmaeodera	Acmaeodera sp.	NC_013580.1	16217	4A:174, 5A:74, 6A:31, 7A:8, 8A:8, 9A:2, 10A:3	4T:68, 5T:28, 6T:6, 7T:2, 8T:1, 17T:1	4C:33, 5C:14, 6C:3, 7C:1	4G:5, 5G:1, 6G:1
Arthropoda	Insecta	Coleoptera	Bostrichidae	Apatides	Apatides fortis	NC_013582.1	16171	4A:138, 5A:81, 6A:30, 7A:14, 8A:8	4T:53, 5T:14, 6T:3, 7T:2, 11T:1	4C:44, 5C:17, 6C:2, 7C:1, 9C:1	4G:13, 5G:3, 7G:1, 12G:1
Chordata	Actinopteri	Anguilliformes	Chlopsidae	Robinsia	Robinsia catherinae	AP010846.1	16627	4A:76, 5A:40, 6A:6, 7A:3	4T:46, 5T:11, 7T:2, 8T:1	4C:76, 5C:29, 6C:6	4G:20, 5G:12, 6G:1
Chordata	Actinopteri	Anguilliformes	Chlopsidae	Kaupichthys	Kaupichthys hyoproroides	AP010845.1	16662	4A:88, 5A:34, 6A:11, 7A:4, 8A:2	4T:48, 5T:10, 6T:4, 7T:1, 8T:1	4C:64, 5C:33, 6C:7, 7C:1	4G:16, 5G:8, 6G:1, 13G:1
Chordata	Actinopteri	Anguilliformes	Muraenidae	Rhinomuraena	Rhinomuraena quaesita	AP010844.1	16566	4A:74, 5A:23, 6A:2, 7A:3	4T:69, 5T:18, 6T:4, 7T:3	4C:58, 5C:20, 6C:12, 7C:1	4G:36, 5G:9, 6G:1
Chordata	Actinopteri	Anguilliformes	Heterenchelyidae	Pythonichthys	Pythonichthys microphthalmus	AP010842.1	17042	4A:100, 5A:36, 6A:6, 7A:2	4T:32, 5T:13, 6T:5, 7T:1	4C:75, 5C:49, 6C:20, 7C:2	4G:26, 5G:7, 6G:4, 10G:1
Chordata	Actinopteri	Anguilliformes	Myrocongridae	Myroconger	Myroconger compressus	AP010847.1	16642	4A:95, 5A:38, 6A:4, 7A:3	4T:52, 5T:23, 6T:7, 7T:2, 9T:1	4C:66, 5C:23, 6C:7, 7C:1, 9C:1	4G:25, 5G:9, 6G:3, 7G:2, 10G:1
Chordata	Actinopteri	Anguilliformes	Synaphobranchidae	Ilyophis	Ilyophis brunneus	AP010848.1	16682	4A:87, 5A:37, 6A:4, 7A:4	4T:38, 5T:15, 6T:4, 7T:2, 14T:1	4C:97, 5C:32, 6C:10, 7C:4	4G:30, 5G:14, 6G:2
Chordata	Actinopteri	Anguilliformes	Synaphobranchidae	Simenchelys	Simenchelys parasitica	AP010849.1	16689	4A:74, 5A:34, 6A:6, 7A:6	4T:45, 5T:14, 6T:1, 7T:2, 8T:1, 11T:1	4C:79, 5C:28, 6C:9, 7C:4, 8C:1	4G:21, 5G:10, 6G:1, 7G:1
Chordata	Actinopteri	Anguilliformes	Derichthyidae	Nessorhamphus	Nessorhamphus ingolfianus	AP010850.1	17782	4A:109, 5A:47, 6A:7, 7A:1	4T:43, 5T:10, 6T:2, 8T:1, 9T:2	4C:76, 5C:38, 6C:14, 7C:2	4G:16, 5G:7, 6G:1, 8G:1
Chordata	Actinopteri	Anguilliformes	Derichthyidae	Derichthys	Derichthys serpentinus	AP010851.1	17077	4A:99, 5A:53, 6A:9, 7A:3	4T:47, 5T:17, 6T:3, 18T:1	4C:92, 5C:42, 6C:9, 7C:4, 8C:1, 9C:1, 11C:1	4G:20, 5G:16, 6G:2, 7G:1, 10G:1
Chordata	Actinopteri	Anguilliformes	Muraenesocidae	Muraenesox	Muraenesox bagio	AP010852.1	18247	4A:90, 5A:43, 6A:11, 7A:4, 8A:1	4T:76, 5T:35, 6T:6, 7T:3, 8T:2	4C:62, 5C:15, 6C:3, 8C:4, 10C:1	4G:18, 5G:5, 6G:1, 7G:2, 8G:1
Chordata	Actinopteri	Anguilliformes	Muraenesocidae	Cynoponticus	Cynoponticus ferox	AP010853.1	17822	4A:97, 5A:43, 6A:14, 7A:3	4T:59, 5T:16, 6T:6, 7T:4, 8T:1	4C:69, 5C:29, 6C:5, 7C:6, 8C:1, 10C:1	4G:23, 5G:10, 6G:2, 7G:1, 8G:1
Chordata	Actinopteri	Anguilliformes	Nemichthyidae	Nemichthys	Nemichthys scolopaceus	AP010854.1	17457	4A:60, 5A:25, 6A:5, 7A:3	4T:37, 5T:12, 6T:5, 7T:1, 9T:1	4C:79, 5C:33, 6C:15, 7C:3, 8C:3, 9C:2	4G:24, 5G:13, 6G:5, 8G:1, 9G:2
Chordata	Actinopteri	Anguilliformes	Serrivomeridae	Serrivomer	Serrivomer beanii	AP010857.1	16731	4A:88, 5A:28, 6A:9, 7A:3	4T:58, 5T:8, 6T:3, 9T:1	4C:67, 5C:25, 6C:13, 7C:3, 13C:1	4G:21, 5G:6, 6G:5
Chordata	Actinopteri	Anguilliformes	Congridae	Heteroconger	Heteroconger hassi	AP010859.1	17768	4A:93, 5A:33, 6A:17, 7A:2	4T:48, 5T:9, 6T:7, 7T:1	4C:69, 5C:30, 6C:12, 7C:1	4G:15, 5G:15, 6G:2
Chordata	Actinopteri	Anguilliformes	Congridae	Paraconger	Paraconger notialis	AP010860.1	17729	4A:98, 5A:39, 6A:9, 7A:3	4T:35, 5T:7, 6T:4, 7T:1	4C:76, 5C:27, 6C:12, 7C:3, 10C:1	4G:15, 5G:10, 6G:2
Chordata	Actinopteri	Anguilliformes	Congridae	Ariosoma	Ariosoma shiroanago	AP010861.1	16922	4A:83, 5A:41, 6A:9, 7A:5	4T:67, 5T:18, 6T:4, 7T:3, 8T:1	4C:52, 5C:18, 6C:10, 7C:2	4G:25, 5G:7, 7G:2
Chordata	Actinopteri	Anguilliformes	Ophichthidae	Myrichthys	Myrichthys maculosus	AP010862.1	17859	4A:94, 5A:36, 6A:6, 7A:3	4T:51, 5T:14, 7T:1	4C:63, 5C:30, 6C:12, 7C:3, 11C:1	4G:33, 5G:12, 6G:1
Chordata	Actinopteri	Anguilliformes	Colocongridae	Coloconger	Coloconger cadenati	AP010863.1	17755	4A:101, 5A:42, 6A:12, 7A:4	4T:47, 5T:12, 6T:4, 7T:1, 9T:1, 10T:1	4C:91, 5C:45, 6C:17, 7C:2	4G:14, 5G:12, 6G:3
Chordata	Actinopteri	Anguilliformes	Cyematidae	Cyema	Cyema atrum	AP010870.1	16868	4A:98, 5A:38, 6A:8, 7A:1, 8A:1	4T:56, 5T:20, 6T:4, 7T:2	4C:84, 5C:35, 6C:6, 7C:3, 8C:4, 9C:2	4G:20, 5G:8, 6G:1, 7G:1, 8G:1, 10G:1, 11G:1
Chordata	Actinopteri	Anguilliformes	Monognathidae	Monognathus	Monognathus jesperseni	AP010869.1	22217	4A:130, 5A:26, 6A:7, 7A:1	4T:98, 5T:23, 6T:2, 7T:1	4C:90, 5C:30, 6C:11, 7C:5, 8C:2	4G:30, 5G:15, 6G:9, 7G:2, 8G:2
Chordata	Actinopteri	Anguilliformes	Nettastomatidae	Facciolella	Facciolella oxyrhyncha	AP010866.1	17789	4A:99, 5A:36, 6A:12, 7A:7, 8A:1	4T:59, 5T:13, 6T:2, 7T:1, 11T:1	4C:69, 5C:30, 6C:10, 7C:2	4G:20, 5G:13, 6G:2, 7G:1
Chordata	Actinopteri	Anguilliformes	Nettastomatidae	Hoplunnis	Hoplunnis punctata	AP010865.1	17828	4A:110, 5A:52, 6A:14, 7A:4, 8A:2	4T:44, 5T:6, 6T:3, 7T:2, 9T:1	4C:68, 5C:33, 6C:10, 7C:2, 8C:1	4G:15, 5G:10, 6G:4
Chordata	Actinopteri	Anguilliformes	Nettastomatidae	Nettastoma	Nettastoma parviceps	AP010864.1	17714	4A:98, 5A:34, 6A:7, 7A:4	4T:65, 5T:18, 6T:5, 7T:2, 8T:1, 10T:1	4C:64, 5C:17, 6C:14, 7C:5	4G:34, 5G:9, 6G:5, 7G:1, 8G:1
Chordata	Aves	Galliformes	Phasianidae	Tragopan	Tragopan caboti	NC_013619.1	16727	4A:76, 5A:34, 6A:6, 7A:3	4T:30, 5T:9, 6T:5, 7T:1, 8T:1, 10T:1	4C:83, 5C:25, 6C:11, 7C:3, 8C:1	4G:14, 5G:3, 7G:1
Arthropoda	Insecta	Strepsiptera	Mengenillidae	Mengenilla	Mengenilla australiensis	GU188852.1	13421	4A:111, 5A:51, 6A:35, 7A:20, 8A:8, 9A:5, 10A:1	4T:183, 5T:62, 6T:31, 7T:16, 8T:4, 9T:2, 10T:1	4C:3, 5C:3	4G:2, 5G:1
Arthropoda	Malacostraca	Isopoda	Cirolanidae	Eurydice	Eurydice pulchra	GU130253.1	13055	4A:51, 5A:16, 6A:6, 7A:1	4T:71, 5T:32, 6T:10, 7T:2, 8T:3	4C:35, 5C:5, 6C:1, 7C:1	4G:67, 5G:31, 6G:10
Mollusca	Bivalvia	Unionida	Unionidae	Quadrula	Quadrula quadrula	NC_013658.1	16033	4A:177, 5A:66, 6A:20, 7A:13, 8A:3	4T:45, 5T:30, 6T:6, 8T:1	4C:64, 5C:15, 6C:2, 7C:2	4G:8, 5G:1
Mollusca	Bivalvia	Unionida	Unionidae	Venustaconcha	Venustaconcha ellipsiformis	NC_013659.1	17174	4A:165, 5A:71, 6A:31, 7A:11, 8A:7, 9A:2	4T:39, 5T:28, 6T:11, 7T:2, 8T:3	4C:60, 5C:12, 6C:1, 7C:3, 8C:2	4G:13, 5G:1
Mollusca	Bivalvia	Unionida	Unionidae	Pyganodon	Pyganodon grandis	NC_013661.1	15848	4A:130, 5A:58, 6A:32, 7A:17, 8A:3, 9A:1	4T:71, 5T:23, 6T:15, 7T:4, 8T:1	4C:42, 5C:17, 6C:3, 8C:1, 10C:1	4G:10, 5G:3, 6G:1
Porifera	Demospongiae	Dictyoceratida	Irciniidae	Ircinia	Ircinia strobilina	NC_013662.1	16414	4A:75, 5A:18, 6A:9, 7A:6	4T:155, 5T:69, 6T:31, 7T:19, 8T:7, 9T:2, 10T:1	4C:15, 5C:3, 6C:1	4G:92, 5G:57, 6G:25, 7G:5, 8G:3
Arthropoda	Insecta	Hemiptera	Delphacidae	Laodelphax	Laodelphax striatellus	NC_013706.1	16513	4A:168, 5A:96, 6A:69, 7A:13, 8A:21, 9A:6, 10A:5, 11A:5, 12A:4, 13A:1, 14A:1, 15A:2	4T:140, 5T:68, 6T:17, 7T:3, 8T:6, 9T:2, 21T:1	4C:20, 5C:10, 6C:4, 7C:2	4G:4, 5G:2
Chordata	Actinopteri	Cypriniformes	Leuciscidae	Mylocheilus	Mylocheilus caurinus	AP010779.1	16657	4A:57, 5A:23, 6A:5	4T:55, 5T:16, 6T:3, 7T:1	4C:66, 5C:23, 6C:7, 7C:2	4G:23, 5G:10, 6G:4
Chaetognatha	Sagittoidea	Aphragmophora	Sagittidae	Zonosagitta	Zonosagitta nagae	AP011545.1	11459	4A:68, 5A:34, 6A:13, 7A:3, 8A:3, 9A:1, 10A:1	4T:59, 5T:34, 6T:8, 7T:2, 8T:3	4C:13, 5C:4	4G:20, 5G:5, 6G:1
Chaetognatha	Sagittoidea	Aphragmophora	Sagittidae	Decipisagitta	Decipisagitta decipiens	AP011546.1	11121	4A:64, 5A:24, 6A:12, 7A:9, 8A:5, 9A:2, 10A:1	4T:85, 5T:37, 6T:13, 7T:5, 8T:3, 9T:3, 10T:2, 11T:1, 14T:1	4C:12, 5C:2, 6C:2, 7C:1, 8C:3	4G:16, 5G:2, 8G:1
Chaetognatha	Sagittoidea	Aphragmophora	Sagittidae	Flaccisagitta	Flaccisagitta enflata	AP011547.1	12631	4A:71, 5A:31, 6A:14, 7A:5, 8A:5, 9A:3, 11A:1	4T:87, 5T:51, 6T:25, 7T:8, 8T:4, 9T:5, 10T:1, 12T:1	4C:29, 5C:16, 6C:6, 7C:1, 8C:1, 9C:1	4G:13, 5G:3, 6G:1
Nematoda	Chromadorea	Rhabditida	Metastrongylidae	Metastrongylus	Metastrongylus salmi	NC_013815.1	13778	4A:47, 5A:18, 6A:4, 8A:1	4T:208, 5T:139, 6T:75, 7T:41, 8T:30, 9T:16, 10T:7, 11T:2, 12T:3, 13T:3, 15T:1	5C:1	4G:17, 5G:4, 6G:1
Nematoda	Chromadorea	Rhabditida	Syngamidae	Syngamus	Syngamus trachea	NC_013821.1	14647	4A:66, 5A:24, 6A:4, 7A:2, 9A:1, 11A:1	4T:259, 5T:108, 6T:72, 7T:29, 8T:19, 9T:7, 11T:1	4C:4, 5C:1	4G:22, 5G:11, 6G:3
Chordata	Actinopteri	Perciformes	Cottidae	Clinocottus	Clinocottus analis	NC_013828.1	18374	4A:60, 5A:24, 6A:8	4T:43, 5T:25, 6T:9, 7T:3, 10T:2	4C:95, 5C:76, 6C:32, 7C:6, 9C:2, 10C:5	4G:24, 5G:15, 6G:1
Mollusca	Gastropoda	Littorinimorpha	Pomatiopsidae	Tricula	Tricula hortensis	NC_013833.1	15179	4A:102, 5A:29, 6A:13, 7A:6, 8A:4, 11A:1	4T:186, 5T:73, 6T:44, 7T:19, 8T:6	4C:11	4G:12
Arthropoda	Insecta	Orthoptera	Acrididae	Prumna	Prumna arctica	NC_013835.1	15628	4A:168, 5A:74, 6A:31, 7A:18, 8A:5, 9A:2, 10A:1	4T:99, 5T:26, 6T:11, 7T:3, 8T:2	4C:7, 5C:1, 6C:1	4G:5, 5G:2
Mollusca	Caudofoveata	Chaetodermatida	Chaetodermatidae	Chaetoderma	Chaetoderma nitidulum	NC_013846.1	21008	4A:167, 5A:87, 6A:35, 7A:12, 8A:5, 9A:9, 10A:5, 11A:3, 18A:1, 20A:1	4T:135, 5T:40, 6T:11, 7T:8, 8T:1, 19T:1	4C:61, 5C:15, 6C:12, 7C:2, 8C:2, 9C:1	4G:7, 5G:2
Nematoda	Chromadorea	Rhabditida	Trichostrongylidae	Mecistocirrus	Mecistocirrus digitatus	NC_013848.1	15221	4A:119, 5A:52, 6A:27, 7A:7, 8A:5, 9A:7, 10A:2, 11A:2	4T:235, 5T:98, 6T:55, 7T:26, 8T:17, 9T:12, 10T:3, 11T:1	4C:2	4G:19, 5G:5
Chordata	Actinopteri	Lophiiformes	Lophiidae	Lophiodes	Lophiodes caulinaris	AB282826.1	16471	4A:54, 5A:22, 6A:9, 7A:1, 8A:2	4T:67, 5T:21, 6T:4, 7T:3, 12T:1	4C:83, 5C:41, 6C:16, 7C:4, 8C:1	4G:33, 5G:12, 6G:1, 7G:1
Chordata	Actinopteri	Lophiiformes	Lophiidae	Sladenia	Sladenia gardineri	AB282827.1	16435	4A:62, 5A:34, 6A:5, 7A:2	4T:50, 5T:16, 6T:7, 7T:1, 8T:1	4C:76, 5C:36, 6C:11, 7C:4	4G:25, 5G:9, 6G:2
Chordata	Actinopteri	Lophiiformes	Antennariidae	Antennarius	Antennarius striatus	AB282828.1	16114	4A:68, 5A:27, 6A:12, 7A:3, 8A:1	4T:73, 5T:20, 6T:7, 7T:3	4C:55, 5C:25, 6C:2, 7C:1, 11C:1	4G:18, 5G:10, 6G:2
Chordata	Actinopteri	Lophiiformes	Antennariidae	Histrio	Histrio histrio	AB282829.1	16394	4A:61, 5A:30, 6A:8, 7A:1	4T:78, 5T:32, 6T:5, 7T:6	4C:57, 5C:22, 6C:4	4G:27, 5G:11, 6G:1
Chordata	Actinopteri	Lophiiformes	Antennariidae	Abantennarius	Abantennarius coccineus	AB282830.1	16243	4A:73, 5A:32, 6A:12, 7A:3	4T:77, 5T:36, 6T:9, 7T:1	4C:64, 5C:26, 6C:6	4G:13, 5G:5
Chordata	Actinopteri	Lophiiformes	Tetrabrachiidae	Tetrabrachium	Tetrabrachium ocellatum	AB282831.1	19100	4A:64, 5A:15, 6A:7, 9A:2	4T:207, 5T:79, 6T:31, 7T:21, 8T:3, 9T:2	4C:17, 5C:6, 6C:2	4G:67, 5G:26, 6G:13, 7G:1, 8G:1, 11G:1
Chordata	Actinopteri	Lophiiformes	Ogcocephalidae	Coelophrys	Coelophrys brevicaudata	AB282834.1	16862	4A:65, 5A:36, 6A:9, 7A:3	4T:74, 5T:26, 6T:16, 7T:2, 8T:1, 11T:1	4C:84, 5C:38, 6C:11, 7C:2, 8C:1, 10C:1, 15C:1	4G:34, 5G:14, 6G:5, 15G:1
Chordata	Actinopteri	Lophiiformes	Ogcocephalidae	Zalieutes	Zalieutes elater	AB282835.1	15977	4A:83, 5A:23, 6A:4, 7A:2, 8A:2	4T:101, 5T:28, 6T:10, 7T:6, 8T:1	4C:75, 5C:27, 6C:9, 7C:2	4G:19, 5G:8
Chordata	Actinopteri	Lophiiformes	Neoceratiidae	Neoceratias	Neoceratias spinifer	AB282837.1	16417	4A:46, 5A:10, 6A:4	4T:59, 5T:24, 6T:5, 7T:5, 10T:1	4C:81, 5C:46, 6C:21, 7C:4, 8C:3	4G:32, 5G:11, 6G:1, 7G:2
Chordata	Actinopteri	Lophiiformes	Melanocetidae	Melanocetus	Melanocetus johnsonii	AB282838.1	16871	4A:47, 5A:16, 6A:5, 7A:1	4T:53, 5T:14, 6T:2, 7T:1, 10T:1	4C:97, 5C:45, 6C:22, 7C:5, 9C:1, 10C:1	4G:31, 5G:11, 6G:3
Chordata	Actinopteri	Lophiiformes	Himantolophidae	Himantolophus	Himantolophus groenlandicus	AB282840.1	16438	4A:45, 5A:19, 6A:5, 7A:1	4T:54, 5T:11, 10T:1	4C:89, 5C:47, 6C:19, 7C:6, 8C:2	4G:25, 5G:12, 6G:2
Chordata	Actinopteri	Lophiiformes	Diceratiidae	Bufoceratias	Bufoceratias thele	AB282841.1	16430	4A:53, 5A:18, 6A:4	4T:47, 5T:16, 6T:4, 7T:1	4C:79, 5C:46, 6C:18, 7C:5	4G:30, 5G:9, 6G:3
Chordata	Actinopteri	Lophiiformes	Diceratiidae	Diceratias	Diceratias pileatus	AB282842.1	16431	4A:54, 5A:15, 6A:2, 7A:1	4T:53, 5T:16, 6T:4, 7T:1	4C:74, 5C:49, 6C:20, 7C:2, 8C:1	4G:26, 5G:8, 6G:1
Chordata	Actinopteri	Lophiiformes	Oneirodidae	Oneirodes	Oneirodes thompsoni	AB282843.1	17391	4A:54, 5A:25, 6A:3	4T:49, 5T:21, 6T:4, 7T:1, 8T:1, 10T:1	4C:104, 5C:52, 6C:15, 7C:4, 8C:1, 9C:2, 10C:1, 12C:1	4G:36, 5G:12, 6G:3, 7G:2
Chordata	Actinopteri	Lophiiformes	Oneirodidae	Puck	Puck pinnata	AB282844.1	17025	4A:60, 5A:23, 6A:3	4T:43, 5T:10, 6T:1	4C:98, 5C:65, 6C:10, 9C:1	4G:30, 5G:18, 6G:4
Chordata	Actinopteri	Lophiiformes	Oneirodidae	Chaenophryne	Chaenophryne melanorhabdus	AB282845.1	16651	4A:67, 5A:27, 6A:2, 7A:1	4T:60, 5T:18, 6T:3, 8T:1	4C:77, 5C:57, 6C:12, 7C:1	4G:28, 5G:13, 6G:1, 8G:1
Chordata	Actinopteri	Lophiiformes	Oneirodidae	Bertella	Bertella idiomorpha	AB282846.1	16180	4A:57, 5A:20, 6A:1, 7A:3	4T:48, 5T:22, 6T:3	4C:95, 5C:52, 6C:16, 7C:2, 8C:1, 9C:2	4G:30, 5G:12, 6G:4, 7G:1
Chordata	Actinopteri	Lophiiformes	Thaumatichthyidae	Thaumatichthys	Thaumatichthys pagidostomus	AB282847.1	16828	4A:64, 5A:30, 6A:5, 7A:1	4T:63, 5T:25, 6T:2, 7T:2, 8T:1	4C:71, 5C:45, 6C:12, 7C:2, 8C:1	4G:28, 5G:8, 7G:1
Chordata	Actinopteri	Lophiiformes	Ceratiidae	Cryptopsaras	Cryptopsaras couesii	AB282850.1	18350	4A:80, 5A:17, 6A:3, 7A:2, 8A:1	4T:58, 5T:26, 6T:7, 7T:1, 8T:3	4C:93, 5C:39, 6C:11, 7C:2, 9C:1, 10C:2, 11C:1, 12C:1	4G:43, 5G:13, 6G:3, 7G:1, 15G:1
Chordata	Actinopteri	Lophiiformes	Ceratiidae	Ceratias	Ceratias uranoscopus	AB282851.1	18365	4A:45, 5A:13, 6A:3	4T:48, 5T:16, 6T:3, 8T:2	4C:85, 5C:71, 6C:32, 7C:8, 8C:1, 9C:1, 11C:1, 22C:1	4G:40, 5G:17, 7G:1, 8G:1
Chordata	Actinopteri	Lophiiformes	Gigantactinidae	Gigantactis	Gigantactis vanhoeffeni	AB282852.1	17205	4A:64, 5A:21, 6A:2, 7A:1	4T:50, 5T:12, 7T:2	4C:98, 5C:45, 6C:19, 7C:4, 8C:1, 9C:2	4G:32, 5G:14, 6G:2, 7G:2, 8G:1
Chordata	Actinopteri	Lophiiformes	Gigantactinidae	Rhynchactis	Rhynchactis macrothrix	AB282853.1	17072	4A:60, 5A:15, 6A:3	4T:50, 5T:19, 7T:1, 8T:1, 10T:1	4C:97, 5C:43, 6C:17, 7C:3, 8C:1	4G:34, 5G:14, 6G:4
Chordata	Actinopteri	Lophiiformes	Linophrynidae	Linophryne	Linophryne bicornis	AB282854.1	16842	4A:83, 5A:22, 6A:7, 7A:1	4T:65, 5T:32, 6T:4, 7T:1	4C:71, 5C:37, 6C:8, 8C:1	4G:20, 5G:11, 6G:1, 7G:1
Chordata	Actinopteri	Lophiiformes	Linophrynidae	Acentrophryne	Acentrophryne dolichonema	AB282855.1	16899	4A:83, 5A:17, 6A:6, 7A:2	4T:73, 5T:37, 6T:5, 7T:1, 8T:1	4C:75, 5C:32, 6C:6, 7C:1, 8C:2	4G:22, 5G:13, 6G:2, 7G:1
Chordata	Actinopteri	Lophiiformes	Linophrynidae	Haplophryne	Haplophryne mollis	AB282856.1	17209	4A:79, 5A:24, 6A:7, 7A:2	4T:65, 5T:32, 6T:7, 7T:1, 8T:1	4C:88, 5C:27, 6C:8, 7C:3, 8C:1	4G:32, 5G:11, 6G:2
Chordata	Actinopteri	Lophiiformes	Ogcocephalidae	Halieutaea	Halieutaea stellata	AP005977.1	15921	4A:70, 5A:24, 6A:5, 7A:3, 8A:2	4T:67, 5T:20, 6T:15, 7T:2, 8T:1	4C:72, 5C:29, 6C:6	4G:25, 5G:10, 6G:1
Chordata	Actinopteri	Lophiiformes	Ogcocephalidae	Malthopsis	Malthopsis jordani	AP005978.1	16206	4A:60, 5A:20, 6A:6, 7A:1	4T:51, 5T:28, 6T:10, 7T:3, 11T:1	4C:79, 5C:40, 6C:11, 7C:5, 9C:1	4G:29, 5G:13, 6G:1, 8G:1
Echinodermata	Ophiuroidea	Amphilepidida	Ophiocomidae	Ophiocomina	Ophiocomina nigra	FN562577.1	17383	4A:116, 5A:44, 6A:13, 7A:8, 8A:1, 11A:1	4T:89, 5T:31, 6T:10, 7T:2	4C:61, 5C:31, 6C:4, 7C:2, 8C:2	4G:18, 5G:3, 8G:1
Echinodermata	Ophiuroidea	Amphilepidida	Amphiuridae	Amphipholis	Amphipholis squamata	FN562578.1	16907	4A:132, 5A:58, 6A:17, 7A:9, 8A:6, 10A:1, 11A:1	4T:119, 5T:42, 6T:16, 7T:3, 8T:1, 9T:1	4C:39, 5C:9, 6C:1, 7C:1	4G:13, 5G:3, 6G:1
Echinodermata	Ophiuroidea	Euryalida	Gorgonocephalidae	Astrospartus	Astrospartus mediterraneus	FN562580.1	16238	4A:161, 5A:89, 6A:34, 7A:39, 8A:16, 9A:4, 10A:6, 12A:2, 14A:1, 18A:1, 20A:1	4T:139, 5T:46, 6T:17, 7T:6, 8T:3, 10T:1, 11T:1, 18T:1	4C:21, 5C:6	4G:4, 5G:2, 6G:1
Echinodermata	Echinoidea	Spatangoida	Loveniidae	Echinocardium	Echinocardium cordatum	FN562581.1	15767	4A:92, 5A:44, 6A:5, 7A:2	4T:88, 5T:29, 6T:10, 7T:1, 8T:2	4C:38, 5C:18, 6C:6, 7C:3	4G:30, 5G:13, 6G:1, 20G:1
Echinodermata	Holothuroidea	Aspidochirotida	Holothuriidae	Holothuria	Holothuria forskali	FN562582.1	15841	4A:81, 5A:43, 6A:14, 7A:8, 8A:3	4T:94, 5T:37, 6T:16, 7T:2	4C:37, 5C:8, 6C:2, 8C:1	4G:11, 5G:3
Mollusca	Gastropoda	Systellommatophora	Onchidiidae	Platevindex	Platevindex mortoni	NC_013934.1	13991	4A:58, 5A:19, 6A:8, 7A:5, 9A:1	4T:123, 5T:67, 6T:13, 7T:10, 8T:2, 9T:2	4C:15, 5C:2	4G:33, 5G:10, 6G:2, 8G:1
Arthropoda	Insecta	Phasmatodea	Bacillidae	Bacillus	Bacillus atticus	GU001955.1	14141	4A:156, 5A:77, 6A:33, 7A:18, 8A:6, 9A:4, 10A:2, 11A:1	4T:69, 5T:25, 6T:8, 8T:1	4C:8, 5C:4	4G:5
Arthropoda	Insecta	Ephemeroptera	Leptophlebiidae	Habrophlebiodes	Habrophlebiodes zijinensis	GU936203.1	14355	4A:96, 5A:47, 6A:16, 7A:10, 8A:6, 9A:1	4T:122, 5T:51, 6T:21, 7T:11, 8T:4	4C:36, 5C:32, 6C:15, 7C:1, 8C:1	4G:14, 5G:6, 6G:2, 7G:3, 8G:1
Arthropoda	Insecta	Ephemeroptera	Heptageniidae	Paegniodes	Paegniodes cupulatus	HM004123.1	15715	4A:106, 5A:31, 6A:9	4T:108, 5T:29, 6T:6, 7T:1	4C:41, 5C:10, 6C:1	4G:19, 5G:2
Chordata	Mammalia	Primates	Hylobatidae	Symphalangus	Symphalangus syndactylus	AB504750.1	16516	4A:75, 5A:27, 6A:10, 7A:5, 8A:1	4T:29, 5T:7, 6T:4	4C:85, 5C:29, 6C:9, 8C:1	4G:6, 5G:5, 6G:1
Chordata	Lepidosauria	Squamata	Agamidae	Pseudotrapelus	Pseudotrapelus sinaitus	AB262447.2	16560	4A:108, 5A:43, 6A:15, 7A:9, 8A:5, 9A:1	4T:48, 5T:15, 6T:4	4C:77, 5C:18, 6C:6, 7C:4, 9C:1	4G:19, 5G:7, 7G:1
Chordata	Aves	Otidiformes	Otididae	Otis	Otis tarda	NC_014046.1	16849	4A:89, 5A:29, 6A:7, 7A:4, 8A:1	4T:23, 5T:10, 6T:2, 8T:1	4C:78, 5C:42, 6C:6, 7C:4, 10C:1	4G:15, 5G:7
Arthropoda	Insecta	Lepidoptera	Erebidae	Hyphantria	Hyphantria cunea	NC_014058.1	15481	4A:134, 5A:67, 6A:16, 7A:15, 8A:2, 9A:2, 10A:3, 11A:1, 12A:1, 13A:1	4T:144, 5T:76, 6T:29, 7T:13, 8T:4, 9T:1, 10T:4, 11T:1, 12T:1, 15T:1, 18T:1	4C:16, 5C:7, 7C:1	4G:1, 5G:1
Chordata	Lepidosauria	Squamata	Agamidae	Uromastyx	Uromastyx benti	AB114447.1	16380	4A:115, 5A:44, 6A:12, 7A:3, 8A:1	4T:23, 5T:3, 6T:2, 7T:1	4C:53, 5C:12, 6C:7, 8C:1, 9C:1, 10C:2	4G:15, 5G:1, 6G:1
Chordata	Lepidosauria	Squamata	Chamaeleonidae	Brookesia	Brookesia decaryi	AB474914.1	17324	4A:124, 5A:63, 6A:23, 7A:9, 8A:7, 9A:3, 10A:1, 11A:1	4T:75, 5T:24, 6T:16, 7T:7, 8T:3, 9T:1, 10T:1, 12T:1, 14T:1	4C:32, 5C:7, 6C:4	4G:19, 5G:1
Chordata	Lepidosauria	Squamata	Chamaeleonidae	Calumma	Calumma parsonii	AB474915.1	17497	4A:108, 5A:57, 6A:19, 7A:7, 8A:3	4T:56, 5T:28, 6T:5, 7T:2, 8T:2, 9T:3, 12T:1	4C:52, 5C:13, 6C:2, 7C:1	4G:13, 5G:6, 6G:2
Chordata	Lepidosauria	Squamata	Chamaeleonidae	Trioceros	Trioceros melleri	AB474916.1	16832	4A:100, 5A:55, 6A:18, 7A:11, 8A:3, 9A:2	4T:66, 5T:33, 6T:9, 7T:5, 8T:4, 9T:1, 12T:1	4C:51, 5C:13, 6C:6, 7C:4, 8C:1	4G:19, 5G:8, 6G:2, 7G:1
Chordata	Lepidosauria	Squamata	Chamaeleonidae	Kinyongia	Kinyongia fischeri	AB474917.1	17400	4A:101, 5A:49, 6A:19, 7A:7, 8A:6, 9A:3	4T:57, 5T:20, 6T:8, 7T:9, 8T:4, 13T:1	4C:67, 5C:27, 6C:8, 7C:1, 8C:3, 9C:1	4G:9, 5G:8, 6G:4, 7G:1
Chordata	Lepidosauria	Squamata	Chamaeleonidae	Rieppeleon	Rieppeleon kerstenii	AB474918.1	17982	4A:124, 5A:51, 6A:21, 7A:6, 8A:4, 9A:2, 10A:1	4T:51, 5T:26, 6T:5, 7T:3, 8T:2, 9T:2, 10T:1, 12T:1	4C:59, 5C:27, 6C:12, 7C:5, 9C:1	4G:26, 5G:9, 6G:1, 8G:1
Chordata	Lepidosauria	Squamata	Agamidae	Hydrosaurus	Hydrosaurus amboinensis	AB475096.1	16129	4A:94, 5A:43, 6A:15, 7A:6, 8A:1	4T:35, 5T:5, 10T:1	4C:73, 5C:20, 6C:4, 8C:1, 9C:1	4G:12, 5G:7, 6G:1
Chordata	Lepidosauria	Squamata	Agamidae	Acanthosaura	Acanthosaura armata	AB266452.1	16544	4A:97, 5A:57, 6A:17, 7A:4, 8A:2	4T:39, 5T:11, 6T:2, 7T:3, 9T:1	4C:61, 5C:19, 6C:12, 7C:3, 9C:1, 10C:1	4G:9, 5G:5, 6G:1, 7G:1
Arthropoda	Insecta	Lepidoptera	Nymphalidae	Sasakia	Sasakia charonda	AP011825.1	15222	4A:138, 5A:48, 6A:23, 7A:8, 8A:3, 9A:5, 10A:4, 11A:2	4T:150, 5T:71, 6T:35, 7T:15, 8T:9, 9T:6, 10T:1, 11T:2, 17T:1	4C:21, 5C:14, 6C:2	4G:5, 5G:2, 6G:1
Chordata	Hyperoartia	Petromyzontiformes	Petromyzontidae	Lethenteron	Lethenteron reissneri	AB565771.1	16461	4A:76, 5A:27, 6A:8, 7A:5, 8A:2	4T:85, 5T:18, 6T:5, 7T:1, 8T:1, 10T:1, 11T:2	4C:46, 5C:21, 6C:3, 7C:2	4G:15, 5G:3
Chordata	Actinopteri	Clupeiformes	Engraulidae	Amazonsprattus	Amazonsprattus scintilla	AP009617.1	16720	4A:56, 5A:16, 6A:5, 8A:1	4T:73, 5T:28, 6T:4, 7T:2, 9T:1	4C:68, 5C:32, 6C:5, 7C:1	4G:24, 5G:7, 6G:2
Chordata	Actinopteri	Clupeiformes	Clupeidae	Brevoortia	Brevoortia tyrannus	AP009618.1	16692	4A:51, 5A:15, 6A:5, 7A:1	4T:36, 5T:6, 6T:2, 7T:1	4C:75, 5C:34, 6C:13	4G:28, 5G:15, 6G:2
Chordata	Actinopteri	Clupeiformes	Engraulidae	Coilia	Coilia reynaldi	AP011559.1	17064	4A:77, 5A:27, 6A:13, 7A:2, 8A:1	4T:49, 5T:17, 6T:1, 8T:1	4C:75, 5C:31, 6C:12, 7C:4	4G:16, 5G:8
Chordata	Actinopteri	Clupeiformes	Engraulidae	Lycothrissa	Lycothrissa crocodilus	AP011562.1	17069	4A:59, 5A:33, 6A:10, 7A:3, 8A:2	4T:47, 5T:11, 6T:6	4C:74, 5C:31, 6C:14, 7C:4	4G:14, 5G:5
Chordata	Actinopteri	Clupeiformes	Engraulidae	Lycengraulis	Lycengraulis grossidens	AP011563.1	16671	4A:68, 5A:26, 6A:7	4T:59, 5T:18, 6T:3, 7T:1, 8T:2	4C:66, 5C:34, 6C:11, 7C:3	4G:24, 5G:4, 6G:1
Chordata	Actinopteri	Clupeiformes	Engraulidae	Stolephorus	Stolephorus waitei	AP011567.1	16238	4A:73, 5A:20, 6A:7, 7A:2	4T:73, 5T:18, 6T:8, 7T:2	4C:66, 5C:29, 6C:7, 7C:1, 8C:1, 10C:1	4G:19, 5G:7, 6G:1
Onychophora	Udeonychophora	Euonychophora	Peripatopsidae	Opisthopatus	Opisthopatus cinctipes	NC_014273.1	13673	4A:115, 5A:48, 6A:11, 7A:7, 8A:3	4T:159, 5T:47, 6T:21, 7T:11, 8T:5	4C:9, 5C:2, 6C:2	4G:9, 5G:6, 7G:2
Arthropoda	Insecta	Blattodea	Corydiidae	Eupolyphaga	Eupolyphaga sinensis	NC_014274.1	15553	4A:151, 5A:47, 6A:18, 7A:16, 8A:8, 9A:2, 10A:2, 11A:1	4T:79, 5T:24, 6T:11, 7T:1, 9T:1	4C:21, 5C:4	4G:3, 5G:2
Arthropoda	Insecta	Lepidoptera	Tortricidae	Spilonota	Spilonota lechriaspis	NC_014294.1	15368	4A:136, 5A:57, 6A:29, 7A:14, 8A:4, 9A:3, 10A:5, 11A:1	4T:160, 5T:84, 6T:28, 7T:19, 8T:7, 9T:3, 10T:3, 11T:1, 19T:1	4C:14, 5C:5, 6C:4	4G:1
Chordata	Amphibia	Anura	Ranidae	Amolops	Amolops larutensis	AB511292.1	13975	4A:26, 5A:13, 6A:5	4T:50, 5T:17, 6T:6, 7T:1, 8T:1	4C:62, 5C:35, 6C:6, 7C:7, 8C:2, 9C:3	4G:8, 5G:2
Chordata	Mammalia	Primates	Cebidae	Callithrix	Callithrix jacchus	AB572419.1	16469	4A:74, 5A:35, 6A:6, 7A:2	4T:43, 5T:13, 6T:3	4C:53, 5C:22, 6C:8, 13C:1	4G:11, 5G:4, 6G:1
Chordata	Aves	Passeriformes	Paridae	Pseudopodoces	Pseudopodoces humilis	NC_014341.1	16809	4A:71, 5A:26, 6A:5, 7A:2	4T:31, 5T:8, 6T:2	4C:82, 5C:33, 6C:14, 7C:1, 8C:3, 21C:1	4G:14, 5G:2
Arthropoda	Malacostraca	Stomatopoda	Squillidae	Oratosquilla	Oratosquilla oratoria	NC_014342.1	15783	4A:131, 5A:50, 6A:22, 7A:10, 8A:3, 9A:2	4T:136, 5T:47, 6T:19, 7T:10, 8T:3, 9T:1	4C:19, 5C:14	4G:6, 5G:3
Arthropoda	Insecta	Orthoptera	Acrididae	Gomphocerippus	Gomphocerippus rufus	NC_014349.1	15598	4A:157, 5A:82, 6A:24, 7A:18, 8A:10, 9A:2	4T:102, 5T:25, 6T:10, 7T:2	4C:13, 5C:5	4G:9, 5G:1, 6G:1
Mollusca	Bivalvia	Pterioida	Pteriidae	Pinctada	Pinctada margaritifera	HM467838.1	15680	4A:58, 5A:25, 6A:17, 7A:9, 8A:1	4T:149, 5T:69, 6T:28, 7T:14, 8T:8, 11T:1, 14T:1	4C:18, 5C:4, 6C:1, 7C:1, 8C:1	4G:94, 5G:34, 6G:8, 7G:7
Mollusca	Gastropoda	Neogastropoda	Olividae	Amalda	Amalda northlandica	NC_014403.1	15354	4A:72, 5A:26, 6A:14, 7A:1	4T:155, 5T:62, 6T:23, 7T:11, 8T:2	4C:15, 5C:3	4G:23, 5G:4
Chordata	Actinopteri	Lobotiformes	Hapalogenyidae	Hapalogenys	Hapalogenys nigripinnis	NC_014404.1	16478	4A:76, 5A:24, 6A:8, 7A:2	4T:51, 5T:16, 6T:8, 7T:3	4C:67, 5C:40, 6C:7, 10C:1	4G:16, 5G:4, 7G:1
Arthropoda	Insecta	Orthoptera	Pyrgomorphidae	Mekongiana	Mekongiana xiangchengensis	NC_014450.1	15567	4A:175, 5A:67, 6A:25, 7A:15, 8A:5, 9A:2	4T:77, 5T:21, 6T:9, 7T:4	4C:14, 5C:1, 6C:1, 7C:1	4G:6
Arthropoda	Hexanauplia	Siphonostomatoida	Caligidae	Caligus	Caligus clemensi	HQ157566.1	13440	4A:86, 5A:45, 6A:20, 7A:14, 8A:6, 11A:2	4T:139, 5T:46, 6T:19, 7T:10, 8T:5, 9T:1, 10T:1, 13T:1	4C:8, 5C:2, 7C:1, 8C:1	4G:22, 5G:7, 6G:5, 7G:1, 8G:1
Nematoda	Chromadorea	Rhabditida	Onchocercidae	Chandlerella	Chandlerella quiscali	NC_014486.1	13757	4A:38, 5A:13, 6A:6, 7A:2	4T:233, 5T:156, 6T:81, 7T:70, 8T:31, 9T:35, 10T:5, 11T:7, 12T:5, 13T:3, 14T:1, 15T:1, 20T:1, 23T:1		4G:9, 5G:3
Arthropoda	Insecta	Orthoptera	Tridactylidae	Ellipes	Ellipes minuta	NC_014488.1	15451	4A:94, 5A:36, 6A:17, 7A:7, 8A:2, 9A:2, 10A:1	4T:80, 5T:36, 6T:10, 7T:2, 12T:1	4C:47, 5C:9, 6C:3, 7C:2, 8C:1	4G:14, 5G:2, 7G:1
Arthropoda	Insecta	Orthoptera	Romaleidae	Xyleus	Xyleus modestus	NC_014490.1	15723	4A:145, 5A:71, 6A:25, 7A:21, 8A:5, 9A:1, 10A:1	4T:55, 5T:22, 7T:2, 10T:1	4C:13, 5C:2, 6C:1	4G:3, 5G:3
Arthropoda	Insecta	Orthoptera	Pneumoridae	Physemacris	Physemacris variolosa	NC_014491.1	17004	4A:170, 5A:81, 6A:31, 7A:20, 8A:7, 9A:3, 10A:2, 11A:2	4T:71, 5T:16, 6T:3, 7T:2, 9T:1	4C:16, 5C:6, 6C:3	4G:6, 5G:3
Nematoda	Chromadorea	Rhabditida	Onchocercidae	Loa	Loa loa	HQ186250.1	13590	4A:23, 5A:7, 6A:2	4T:258, 5T:133, 6T:94, 7T:59, 8T:37, 9T:18, 10T:8, 11T:4, 12T:3, 14T:1, 15T:2	4C:1	4G:10, 6G:1
Chordata	Amphibia	Anura	Dicroglossidae	Hoplobatrachus	Hoplobatrachus tigerinus	AP011543.1	20462	4A:81, 5A:30, 6A:5, 7A:3, 8A:1	4T:64, 5T:11, 6T:3, 7T:3, 8T:1	4C:115, 5C:39, 6C:12, 7C:5, 8C:6	4G:25, 5G:8, 6G:1, 7G:1
Chordata	Amphibia	Anura	Dicroglossidae	Phrynoderma	Phrynoderma hexadactylum	AP011544.1	20280	4A:73, 5A:29, 6A:6, 7A:3, 8A:1	4T:103, 5T:31, 6T:16, 7T:6, 8T:1	4C:78, 5C:42, 6C:13, 7C:3, 8C:1, 9C:3	4G:28, 5G:8, 6G:1, 7G:2, 8G:1, 11G:1
Arthropoda	Insecta	Lepidoptera	Riodinidae	Abisara	Abisara fylloides	HQ259069.1	15301	4A:127, 5A:46, 6A:26, 7A:15, 8A:5, 9A:3, 10A:1, 11A:3	4T:172, 5T:72, 6T:31, 7T:20, 8T:8, 9T:4, 10T:6, 11T:1, 13T:1, 18T:1	4C:15, 5C:6, 6C:2	4G:5, 5G:3
Mollusca	Gastropoda	Littorinimorpha	Vermetidae	Dendropoma	Dendropoma gregarium	NC_014580.1	15641	4A:52, 5A:15, 6A:2, 7A:2	4T:124, 5T:46, 6T:14, 7T:3, 8T:1	4C:13, 5C:5	4G:31, 5G:11, 6G:2, 7G:4, 8G:1
Mollusca	Gastropoda	Littorinimorpha	Vermetidae	Eualetes	Eualetes tulipa	NC_014585.1	15078	4A:43, 5A:17, 6A:3, 7A:2, 8A:2	4T:116, 5T:55, 6T:17, 7T:1, 8T:1, 9T:1	4C:16, 5C:2	4G:41, 5G:14, 6G:4
Chordata	Mammalia	Primates	Cercopithecidae	Rhinopithecus	Rhinopithecus bieti	HQ287798.1	12592	4A:45, 5A:22, 6A:4, 7A:1	4T:38, 5T:12, 6T:2	4C:37, 5C:11, 6C:2	4G:8, 5G:2, 6G:1
Arthropoda	Insecta	Lepidoptera	Papilionidae	Sericinus	Sericinus montela	HQ259122.1	15242	4A:138, 5A:55, 6A:24, 7A:16, 8A:6, 9A:6, 10A:2, 11A:3	4T:167, 5T:66, 6T:28, 7T:11, 8T:12, 9T:1, 10T:1, 11T:3, 12T:1, 18T:1	4C:17, 5C:13, 6C:1, 7C:1	4G:1, 5G:1
Arthropoda	Insecta	Coleoptera	Cerambycidae	Closteromerus	Closteromerus claviger	HQ232804.1	12185	4A:141, 5A:65, 6A:34, 7A:19, 8A:7, 9A:1, 10A:2, 11A:1	4T:72, 5T:32, 6T:5, 7T:2	4C:21, 5C:4, 6C:2	4G:3, 5G:3
Arthropoda	Insecta	Coleoptera	Chrysomelidae	Peploptera	Peploptera acromialis	HQ232809.1	12549	4A:91, 5A:51, 6A:21, 7A:9, 8A:4	4T:85, 5T:22, 6T:10, 7T:1, 8T:2	4C:21, 5C:15, 6C:2, 7C:3	4G:12, 5G:4
Arthropoda	Insecta	Coleoptera	Heteroceridae	Heterocerus	Heterocerus fenestratus	HQ232811.1	12329	4A:116, 5A:59, 6A:37, 7A:14, 8A:6, 9A:1, 17A:1	4T:79, 5T:32, 6T:4, 7T:1, 8T:1, 9T:1	4C:10, 5C:10, 7C:1
Arthropoda	Insecta	Coleoptera	Lycidae	Lycus	Lycus dentipes	HQ232814.1	12257	4A:124, 5A:65, 6A:32, 7A:14, 8A:4, 9A:3, 10A:3	4T:69, 5T:23, 6T:12, 7T:3	4C:24, 5C:3, 6C:2	4G:2, 5G:1, 6G:1
Arthropoda	Insecta	Coleoptera	Elateridae	Drilus	Drilus flavescens	HQ232815.1	12519	4A:120, 5A:50, 6A:27, 7A:13, 8A:5, 9A:1	4T:50, 5T:17, 6T:3, 7T:2	4C:25, 5C:7, 6C:2, 7C:3	4G:9, 5G:8, 7G:2
Arthropoda	Insecta	Coleoptera	Cantharidae	Cantharis	Cantharis pellucida	HQ232817.1	12400	4A:147, 5A:70, 6A:33, 7A:12, 8A:5, 9A:4, 10A:1	4T:123, 5T:48, 6T:20, 7T:2, 8T:2	4C:7, 5C:4, 6C:1	4G:2
Arthropoda	Insecta	Coleoptera	Boridae	Boros	Boros schneideri	HQ232823.1	12319	4A:120, 5A:60, 6A:26, 7A:12, 8A:8, 9A:1	4T:109, 5T:36, 6T:11, 7T:3, 8T:2, 9T:4, 10T:1	4C:17, 5C:2, 6C:1	5G:2
Arthropoda	Insecta	Coleoptera	Mycetophagidae	Mycetophagus	Mycetophagus quadripustulatus	HQ232824.1	12281	4A:132, 5A:59, 6A:25, 7A:13, 8A:7, 9A:2, 11A:1	4T:117, 5T:44, 6T:18, 7T:9, 8T:2	4C:12, 5C:4, 7C:1	4G:2, 5G:1
Arthropoda	Insecta	Coleoptera	Anthicidae	Omonadus	Omonadus floralis	HQ232825.1	12235	4A:137, 5A:58, 6A:20, 7A:12, 8A:11, 10A:2, 11A:1	4T:71, 5T:24, 6T:8, 7T:4	4C:11, 5C:1	4G:3
Arthropoda	Insecta	Coleoptera	Oedemeridae	Oedemera	Oedemera virescens	HQ232826.1	10653	4A:91, 5A:41, 6A:22, 7A:9, 8A:12, 9A:4, 10A:2, 11A:1	4T:84, 5T:26, 6T:12, 7T:4, 8T:3, 10T:1	4C:14, 5C:3, 6C:1, 7C:1
Arthropoda	Insecta	Orthoptera	Pamphagidae	Thrinchus	Thrinchus schrenkii	NC_014610.1	15672	4A:152, 5A:74, 6A:27, 7A:15, 8A:6, 9A:2	4T:64, 5T:16, 6T:4, 16T:1	4C:23, 5C:6, 6C:2	4G:8, 5G:2
Arthropoda	Malacostraca	Amphipoda	Caprellidae	Caprella	Caprella scaura	AB539699.1	15079	4A:110, 5A:49, 6A:28, 7A:14, 8A:3, 9A:3	4T:123, 5T:41, 6T:23, 7T:6, 8T:3, 9T:2, 10T:1	4C:38, 5C:12, 6C:5	4G:19, 5G:6, 6G:4, 7G:2
Arthropoda	Insecta	Hymenoptera	Formicidae	Atta	Atta cephalotes	HQ415764.1	18815	4A:158, 5A:57, 6A:24, 7A:10, 8A:3, 10A:1	4T:201, 5T:109, 6T:40, 7T:18, 8T:3, 9T:1	4C:33, 5C:12, 6C:6, 9C:2	4G:2, 5G:2
Arthropoda	Insecta	Phasmatodea	Phasmatidae	Entoria	Entoria okinawaensis	AB477459.1	16910	4A:158, 5A:69, 6A:42, 7A:13, 8A:5, 9A:2, 10A:2	4T:84, 5T:31, 6T:6, 7T:2, 8T:3	4C:9, 5C:2	4G:4, 5G:2
Arthropoda	Insecta	Phasmatodea	Heteropterygidae	Orestes	Orestes mouhotii	AB477462.1	16223	4A:175, 5A:97, 6A:32, 7A:7, 8A:5, 9A:2, 10A:2, 11A:1	4T:89, 5T:13, 6T:3, 7T:1, 9T:1	4C:19, 5C:7, 6C:2	4G:14, 5G:2, 6G:1
Arthropoda	Insecta	Phasmatodea	Lonchodidae	Phraortes	Phraortes sp.	AB477465.1	14913	4A:140, 5A:78, 6A:32, 7A:17, 8A:17, 9A:6, 10A:1, 11A:1	4T:60, 5T:24, 6T:10, 7T:3	4C:10, 5C:2	4G:4, 5G:4
Arthropoda	Insecta	Phasmatodea	Lonchodidae	Micadina	Micadina phluctainoides	AB477466.1	16507	4A:168, 5A:120, 6A:39, 7A:19, 8A:11, 9A:7, 10A:1, 11A:3, 12A:1	4T:91, 5T:42, 6T:14, 7T:3, 8T:3, 10T:1	4C:8, 5C:2	4G:22, 5G:6, 7G:1
Arthropoda	Insecta	Phasmatodea	Phasmatidae	Phobaeticus	Phobaeticus serratipes	AB477467.1	16182	4A:165, 5A:77, 6A:43, 7A:11, 8A:14, 9A:2, 10A:2, 11A:1	4T:54, 5T:24, 6T:6, 7T:3, 9T:1	4C:15, 5C:3, 6C:1	4G:5, 6G:1
Arthropoda	Insecta	Phasmatodea	Heteropterygidae	Heteropteryx	Heteropteryx dilatata	AB477468.1	16618	4A:181, 5A:84, 6A:40, 7A:10, 8A:7, 9A:3, 10A:1	4T:73, 5T:27, 6T:2, 7T:1, 8T:1	4C:9, 5C:1	5G:1
Arthropoda	Insecta	Phasmatodea	Lonchodidae	Neohirasea	Neohirasea japonica	AB477469.1	15305	4A:167, 5A:83, 6A:39, 7A:8, 8A:9, 9A:2	4T:77, 5T:26, 6T:8, 7T:2	4C:3, 5C:2	4G:2, 5G:1
Arthropoda	Insecta	Phasmatodea	Lonchodidae	Sipyloidea	Sipyloidea sipylus	AB477470.1	17001	4A:179, 5A:85, 6A:31, 7A:12, 8A:17, 9A:8, 10A:3	4T:82, 5T:40, 6T:7, 7T:3, 8T:1, 10T:1	4C:8, 5C:3	4G:7, 5G:4
Arthropoda	Insecta	Phasmatodea	Phasmatidae	Megacrania	Megacrania alpheus	AB477471.1	17124	4A:173, 5A:99, 6A:48, 7A:14, 8A:11, 9A:3, 10A:2	4T:73, 5T:20, 6T:6, 8T:2, 10T:1	4C:8, 5C:4, 6C:1	4G:6, 5G:3
Chordata	Actinopteri	Osmeriformes	Salangidae	Neosalanx	Neosalanx anderssoni	HM106492.1	16574	4A:68, 5A:12, 6A:5, 7A:1	4T:41, 5T:10, 6T:3, 8T:1	4C:104, 5C:51, 6C:17	4G:38, 5G:17, 6G:3
Chordata	Actinopteri	Osmeriformes	Salangidae	Protosalanx	Protosalanx chinensis	HM106494.1	16889	4A:67, 5A:17, 6A:4, 7A:3	4T:55, 5T:15, 6T:3, 8T:1	4C:107, 5C:51, 6C:16, 8C:1	4G:37, 5G:17, 6G:3
Arthropoda	Insecta	Hymenoptera	Formicidae	Solenopsis	Solenopsis richteri	NC_014677.1	15560	4A:137, 5A:61, 6A:16, 7A:11, 8A:7, 9A:2	4T:137, 5T:53, 6T:33, 7T:7, 8T:6, 10T:1	4C:25, 5C:13, 6C:2, 8C:1, 9C:1	4G:10, 5G:3, 7G:1
Arthropoda	Arachnida	Trombidiformes	Unionicolidae	Unionicola	Unionicola parkeri	NC_014683.1	14734	4A:221, 5A:120, 6A:71, 7A:38, 8A:11, 9A:6, 10A:2, 11A:1	4T:68, 5T:22, 6T:3, 10T:1	4C:32, 5C:8, 6C:2	4G:2, 5G:1
Chordata	Amphibia	Anura	Dicroglossidae	Occidozyga	Occidozyga martensii	NC_014685.1	18321	4A:72, 5A:28, 6A:15, 7A:1, 8A:1	4T:101, 5T:44, 6T:19, 7T:9, 8T:8, 9T:2	4C:52, 5C:17, 6C:8, 7C:2, 8C:3	4G:20, 5G:6, 6G:1, 7G:1
Arthropoda	Insecta	Hemiptera	Aradidae	Aradacanthia	Aradacanthia heissi	HQ441233.1	15528	4A:151, 5A:95, 6A:29, 7A:17, 8A:7, 9A:1, 10A:1	4T:77, 5T:18, 6T:11, 7T:3	4C:19, 5C:5, 7C:2, 11C:1	4G:4, 5G:3
Arthropoda	Hexanauplia	Calanoida	Calanidae	Calanus	Calanus sinicus	HQ619237.1	19404	4A:129, 5A:41, 6A:13, 7A:6, 8A:3, 9A:1, 12A:1	4T:77, 5T:30, 6T:15, 7T:2, 8T:2, 11T:1, 14T:1	4C:37, 5C:10, 6C:3, 9C:1	4G:45, 5G:11, 6G:7, 7G:1, 8G:1, 9G:1, 10G:2
Chordata	Mammalia	Primates	Hylobatidae	Nomascus	Nomascus concolor	HQ622808.1	16133	4A:68, 5A:25, 6A:5, 7A:5, 8A:1	4T:20, 5T:6, 6T:2	4C:73, 5C:23, 6C:7	4G:7, 5G:2
Chordata	Aves	Passeriformes	Corvidae	Podoces	Podoces hendersoni	NC_014879.1	16867	4A:62, 5A:28, 6A:6, 7A:1	4T:31, 5T:13, 6T:1, 8T:1	4C:71, 5C:24, 6C:6, 7C:3, 8C:1, 12C:1	4G:14, 5G:4
Arthropoda	Insecta	Hymenoptera	Formicidae	Pristomyrmex	Pristomyrmex punctatus	AB556947.1	16180	4A:159, 5A:42, 6A:25, 7A:8, 8A:5, 9A:1, 10A:1	4T:143, 5T:70, 6T:28, 7T:17, 8T:6, 9T:2	4C:19, 5C:8, 6C:1	4G:1, 5G:2, 7G:1
Chordata	Actinopteri	Alepocephaliformes	Alepocephalidae	Leptoderma	Leptoderma macrophthalmum	AP011500.1	16607	4A:71, 5A:20, 6A:6, 7A:1	4T:70, 5T:16, 6T:3, 7T:1, 10T:1	4C:102, 5C:33, 6C:12, 7C:1, 8C:1	4G:30, 5G:15, 6G:3, 7G:1
Chordata	Actinopteri	Cypriniformes	Gobionidae	Pseudopungtungia	Pseudopungtungia tenuicorpus	NC_014873.1	16590	4A:77, 5A:21, 6A:4, 7A:2	4T:68, 5T:23, 6T:6, 7T:2, 9T:1	4C:70, 5C:20, 6C:10	4G:25, 5G:6
Chordata	Actinopteri	Osteoglossiformes	Osteoglossidae	Arapaima	Arapaima gigas	AP009497.1	16416	4A:88, 5A:25, 6A:9, 7A:2	4T:60, 5T:17, 6T:5, 7T:1	4C:51, 5C:17, 6C:4, 7C:1	4G:9, 5G:7, 7G:1
Chordata	Actinopteri	Osteoglossiformes	Osteoglossidae	Heterotis	Heterotis niloticus	AP009498.1	16551	4A:78, 5A:36, 6A:7, 7A:1	4T:46, 5T:11, 6T:2, 7T:1	4C:61, 5C:16, 6C:6	4G:12, 5G:4, 6G:1
Chordata	Actinopteri	Hiodontiformes	Hiodontidae	Hiodon	Hiodon tergisus	AP009499.1	16620	4A:76, 5A:35, 6A:7, 7A:2	4T:58, 5T:14, 6T:3	4C:75, 5C:17, 6C:6	4G:18, 5G:7, 6G:1, 10G:1
Chordata	Actinopteri	Osteoglossiformes	Mormyridae	Genyomyrus	Genyomyrus donnyi	AP009500.1	16697	4A:72, 5A:33, 6A:5, 7A:2	4T:28, 5T:8, 6T:1, 10T:1	4C:66, 5C:21, 6C:10, 7C:1, 9C:1	4G:15, 5G:3, 6G:2
Chordata	Actinopteri	Osteoglossiformes	Mormyridae	Myomyrus	Myomyrus macrops	AP009501.1	16697	4A:80, 5A:27, 6A:7, 7A:1	4T:24, 5T:10, 6T:2, 7T:2	4C:79, 5C:27, 6C:11, 7C:1, 10C:1	4G:23, 5G:10
Chordata	Actinopteri	Osteoglossiformes	Notopteridae	Xenomystus	Xenomystus nigri	AP009503.1	16635	4A:70, 5A:28, 6A:6, 7A:4	4T:32, 5T:15, 6T:2, 9T:1	4C:80, 5C:29, 6C:8, 7C:1, 11C:1	4G:13, 5G:6, 6G:1
Chordata	Actinopteri	Osteoglossiformes	Mormyridae	Petrocephalus	Petrocephalus microphthalmus	AP009609.1	17124	4A:67, 5A:40, 6A:9, 7A:2	4T:27, 5T:10, 6T:2, 8T:2	4C:66, 5C:30, 6C:12, 7C:1	4G:12, 5G:5, 6G:2
Chordata	Actinopteri	Osteoglossiformes	Gymnarchidae	Gymnarchus	Gymnarchus niloticus	AP009610.1	16580	4A:80, 5A:35, 6A:10, 7A:1	4T:32, 5T:9	4C:55, 5C:15, 6C:1	4G:10, 5G:3, 6G:1
Chordata	Actinopteri	Osteoglossiformes	Mormyridae	Gnathonemus	Gnathonemus petersii	AP009611.1	16688	4A:71, 5A:30, 6A:6, 7A:1	4T:24, 5T:8, 6T:1, 10T:1	4C:66, 5C:19, 6C:9, 8C:1	4G:19, 5G:3, 6G:3
Chordata	Actinopteri	Osteoglossiformes	Mormyridae	Brevimyrus	Brevimyrus niger	AP009612.1	16755	4A:86, 5A:27, 6A:9, 7A:1	4T:33, 5T:5, 9T:1	4C:62, 5C:16, 6C:6, 7C:1, 8C:1	4G:12, 5G:5, 6G:1, 7G:1
Chordata	Actinopteri	Osteoglossiformes	Mormyridae	Cyphomyrus	Cyphomyrus discorhynchus	AP009613.1	16688	4A:68, 5A:32, 6A:5, 7A:1	4T:28, 5T:6, 6T:1, 10T:1	4C:65, 5C:29, 6C:14, 7C:1, 9C:1	4G:11, 5G:3, 6G:1
Chordata	Actinopteri	Clupeiformes	Clupeidae	Clupeonella	Clupeonella cultriventris	AP009615.1	16650	4A:60, 5A:13, 6A:1	4T:40, 5T:11, 6T:3, 7T:1, 9T:1	4C:83, 5C:29, 6C:6, 7C:2	4G:30, 5G:12, 6G:4
Chordata	Actinopteri	Gonorynchiformes	Kneriidae	Cromeria	Cromeria nilotica	AP011560.1	16065	4A:63, 5A:13, 6A:1, 7A:2	4T:85, 5T:27, 6T:10, 7T:2	4C:67, 5C:48, 6C:8, 11C:1	4G:25, 5G:6, 6G:1
Chordata	Actinopteri	Osteoglossiformes	Pantodontidae	Pantodon	Pantodon buchholzi	AP011564.1	15431	4A:75, 5A:39, 6A:4, 7A:1	4T:86, 5T:22, 6T:4, 7T:1, 8T:2	4C:46, 5C:14, 6C:4	4G:14, 5G:1
Chordata	Actinopteri	Osteoglossiformes	Mormyridae	Boulengeromyrus	Boulengeromyrus knoepffleri	AP011568.1	16540	4A:72, 5A:30, 6A:7, 7A:2	4T:25, 5T:8	4C:67, 5C:30, 6C:10, 7C:1	4G:16, 5G:5, 6G:4
Chordata	Actinopteri	Osteoglossiformes	Mormyridae	Brienomyrus	Brienomyrus brachyistius	AP011569.1	17102	4A:76, 5A:31, 6A:11, 7A:1	4T:35, 5T:4, 6T:3, 10T:1	4C:62, 5C:27, 6C:9, 7C:3	4G:14, 5G:2, 6G:1
Chordata	Actinopteri	Gymnotiformes	Hypopomidae	Brachyhypopomus	Brachyhypopomus occidentalis	AP011570.1	16542	4A:80, 5A:30, 6A:8, 7A:2, 8A:1	4T:48, 5T:19, 7T:2, 11T:1	4C:104, 5C:52, 6C:11, 7C:1	4G:20, 5G:5, 6G:1
Chordata	Actinopteri	Osteoglossiformes	Mormyridae	Hyperopisus	Hyperopisus bebe	AP011572.1	16103	4A:80, 5A:28, 6A:4, 7A:1	4T:21, 5T:5	4C:60, 5C:29, 6C:6, 7C:1	4G:17, 5G:4, 6G:2
Chordata	Actinopteri	Osteoglossiformes	Mormyridae	Isichthys	Isichthys henryi	AP011573.1	16338	4A:78, 5A:36, 6A:9, 7A:2, 8A:1	4T:32, 5T:10, 6T:2, 7T:1, 11T:1	4C:67, 5C:20, 6C:8, 7C:2, 8C:1	4G:14, 5G:5, 6G:2
Chordata	Actinopteri	Osteoglossiformes	Mormyridae	Ivindomyrus	Ivindomyrus marchei	AP011574.1	16675	4A:80, 5A:30, 6A:7, 7A:2	4T:22, 5T:7, 6T:1, 10T:1	4C:70, 5C:20, 6C:12, 7C:1, 8C:1	4G:15, 5G:6, 6G:2
Chordata	Actinopteri	Osteoglossiformes	Mormyridae	Marcusenius	Marcusenius senegalensis	AP011575.1	16691	4A:79, 5A:31, 6A:9, 7A:1, 8A:1	4T:30, 5T:8, 6T:2, 7T:1, 13T:1	4C:69, 5C:19, 6C:6	4G:15, 5G:2
Chordata	Actinopteri	Osteoglossiformes	Mormyridae	Mormyrops	Mormyrops anguilloides	AP011576.1	16848	4A:68, 5A:32, 6A:6, 7A:2, 8A:1	4T:27, 5T:7, 7T:1	4C:72, 5C:30, 6C:9, 7C:4	4G:12, 5G:2, 6G:1
Chordata	Actinopteri	Osteoglossiformes	Mormyridae	Mormyrus	Mormyrus rume	AP011577.1	16730	4A:71, 5A:28, 6A:7, 7A:1	4T:17, 5T:5, 11T:1	4C:73, 5C:21, 6C:7, 7C:1, 8C:1	4G:17, 5G:5, 6G:5
Chordata	Actinopteri	Osteoglossiformes	Mormyridae	Pollimyrus	Pollimyrus adspersus	AP011582.1	16735	4A:82, 5A:27, 6A:6	4T:30, 5T:5, 6T:1, 14T:1	4C:68, 5C:23, 6C:8	4G:10, 5G:5
Chordata	Actinopteri	Gadiformes	Gadidae	Pollachius	Pollachius pollachius	FR751400.1	16539	4A:65, 5A:26, 6A:4, 7A:1	4T:74, 5T:31, 6T:3, 10T:1, 11T:1, 12T:1	4C:73, 5C:26, 6C:5, 10C:1	4G:22, 5G:12
Chordata	Actinopteri	Gadiformes	Gadidae	Micromesistius	Micromesistius poutassou	FR751401.1	16573	4A:63, 5A:23, 6A:7, 7A:2	4T:63, 5T:18, 6T:2, 7T:2, 11T:1	4C:86, 5C:36, 6C:8, 7C:1, 17C:1	4G:21, 5G:11, 6G:1
Chordata	Actinopteri	Gadiformes	Merlucciidae	Merluccius	Merluccius merluccius	FR751402.1	17078	4A:64, 5A:25, 6A:12, 7A:3	4T:48, 5T:10, 6T:7, 7T:2, 10T:1	4C:106, 5C:59, 6C:6, 7C:3, 8C:1, 9C:2, 11C:2, 15C:1	4G:16, 5G:9
Arthropoda	Insecta	Neuroptera	Chrysopidae	Chrysoperla	Chrysoperla nipponensis	AP011623.1	16057	4A:131, 5A:52, 6A:23, 7A:10, 8A:3, 9A:1	4T:157, 5T:70, 6T:31, 7T:7, 8T:2, 9T:1	4C:11, 5C:1, 6C:1	4G:1, 5G:2
Arthropoda	Insecta	Neuroptera	Chrysopidae	Apochrysa	Apochrysa matsumurae	AP011624.1	16214	4A:120, 5A:55, 6A:19, 7A:10, 8A:4, 9A:5	4T:177, 5T:77, 6T:35, 7T:18, 8T:7, 9T:5	4C:15, 5C:4	4G:1
Arthropoda	Insecta	Mecoptera	Boreidae	Boreus	Boreus elegans	HQ696579.1	16803	4A:141, 5A:51, 6A:18, 7A:13, 8A:7, 9A:1, 10A:1, 12A:1, 21A:1	4T:156, 5T:75, 6T:28, 7T:6, 8T:4, 9T:1, 10T:4, 13T:1, 18T:1	4C:11, 5C:4, 6C:1	4G:3, 5G:2, 6G:1
Chordata	Aves	Bucerotiformes	Bucerotidae	Penelopides	Penelopides panini	NC_015087.1	22737	4A:108, 5A:39, 6A:12, 7A:2	4T:23, 5T:28, 6T:5, 9T:2	4C:99, 5C:62, 6C:39, 7C:7, 8C:4	4G:14, 5G:7, 7G:1
Mollusca	Gastropoda	Nudibranchia	Polyceridae	Notodoris	Notodoris gardineri	NC_015111.1	14424	4A:63, 5A:23, 6A:5, 7A:1, 8A:1	4T:145, 5T:46, 6T:23, 7T:9, 8T:1	4C:6, 5C:1	4G:26, 5G:7, 6G:2, 9G:1
Chordata	Aves	Galliformes	Phasianidae	Meleagris	Meleagris gallopavo	NC_010195.2	16719	4A:73, 5A:30, 6A:8, 7A:2	4T:25, 5T:11, 6T:7, 8T:1, 9T:1, 10T:2, 11T:1	4C:75, 5C:28, 6C:6, 7C:3	4G:10, 5G:2, 7G:1
Chordata	Actinopteri	Labriformes	Labridae	Parajulis	Parajulis poecilepterus	NC_009459.2	16441	4A:60, 5A:29, 6A:8, 7A:1, 8A:1	4T:52, 5T:8, 6T:6, 7T:1	4C:87, 5C:39, 6C:6, 7C:3	4G:19, 5G:6, 6G:3
Chordata	Actinopteri	Cypriniformes	Xenocyprididae	Paralaubuca	Paralaubuca typus	AP011211.1	16613	4A:76, 5A:28, 6A:6, 7A:2	4T:60, 5T:15, 7T:1	4C:56, 5C:26, 6C:4, 7C:1	4G:18, 5G:4
Arthropoda	Insecta	Lepidoptera	Pyralidae	Corcyra	Corcyra cephalonica	HQ897685.1	15273	4A:133, 5A:55, 6A:18, 7A:12, 8A:5, 9A:4, 10A:2, 11A:1	4T:148, 5T:67, 6T:34, 7T:15, 8T:3, 9T:5, 10T:3, 11T:1, 20T:1	4C:11, 5C:5, 6C:2	4G:1, 5G:3, 6G:1
Mollusca	Gastropoda	Systellommatophora	Onchidiidae	Peronia	Peronia verruculata	HQ596407.1	13861	4A:60, 5A:29, 6A:10, 7A:1	4T:139, 5T:66, 6T:26, 7T:14, 8T:5, 9T:1	4C:8	4G:29, 5G:10, 6G:4, 7G:1
Nematoda	Chromadorea	Rhabditida	Neodiplogasteridae	Pristionchus	Pristionchus pacificus	NC_015245.1	15954	4A:84, 5A:43, 6A:15, 7A:8, 8A:4, 9A:1, 10A:3	4T:221, 5T:114, 6T:70, 7T:19, 8T:5, 9T:5, 10T:5, 11T:2	4C:4	4G:8, 5G:6, 8G:1
Chordata	Actinopteri	Tetraodontiformes	Tetraodontidae	Colomesus	Colomesus psittacus	AP011910.1	16470	4A:79, 5A:32, 6A:10, 7A:2	4T:40, 5T:19, 6T:8, 7T:3	4C:86, 5C:44, 6C:22	4G:23, 5G:6, 6G:1
Chordata	Actinopteri	Tetraodontiformes	Tetraodontidae	Polyspina	Polyspina piosae	AP011913.1	16418	4A:75, 5A:31, 6A:9, 7A:2, 8A:2	4T:59, 5T:13, 6T:3, 7T:1	4C:77, 5C:40, 6C:15	4G:17, 5G:11
Chordata	Actinopteri	Tetraodontiformes	Tetraodontidae	Auriglobus	Auriglobus modestus	AP011917.1	16807	4A:90, 5A:31, 6A:9, 7A:1	4T:51, 5T:16, 6T:4, 7T:3	4C:81, 5C:44, 6C:12, 13C:1	4G:18, 5G:9, 6G:1
Chordata	Actinopteri	Tetraodontiformes	Tetraodontidae	Carinotetraodon	Carinotetraodon salivator	AP011919.1	16437	4A:84, 5A:34, 6A:8, 7A:1, 8A:1	4T:65, 5T:22, 6T:8, 7T:1	4C:76, 5C:43, 6C:18, 7C:3, 9C:1	4G:21, 5G:6, 7G:2
Chordata	Actinopteri	Tetraodontiformes	Tetraodontidae	Pao	Pao cochinchinensis	AP011925.1	16451	4A:69, 5A:33, 6A:8, 7A:2	4T:38, 5T:16, 6T:2, 8T:1	4C:85, 5C:46, 6C:16, 7C:1	4G:19, 5G:11, 6G:1
Chordata	Actinopteri	Tetraodontiformes	Tetraodontidae	Tetractenos	Tetractenos glaber	AP011935.1	16524	4A:68, 5A:34, 6A:9, 7A:2	4T:37, 5T:16, 6T:1, 9T:1	4C:81, 5C:39, 6C:21, 7C:1, 11C:1	4G:23, 5G:9, 6G:3
Chordata	Actinopteri	Tetraodontiformes	Tetraodontidae	Omegophora	Omegophora armilla	AP011936.1	16471	4A:93, 5A:29, 6A:9, 7A:1	4T:64, 5T:25, 6T:2, 7T:1, 12T:1	4C:67, 5C:22, 6C:5	4G:12, 5G:10, 6G:1
Chordata	Actinopteri	Tetraodontiformes	Tetraodontidae	Marilyna	Marilyna darwinii	AP011937.1	16406	4A:78, 5A:25, 6A:14, 7A:2	4T:52, 5T:11, 6T:1, 11T:1	4C:66, 5C:32, 6C:6, 9C:2	4G:18, 5G:5
Chordata	Actinopteri	Tetraodontiformes	Tetraodontidae	Pelagocephalus	Pelagocephalus marki	AP011938.1	16472	4A:77, 5A:29, 6A:6, 7A:1	4T:41, 5T:15, 6T:2, 9T:1	4C:83, 5C:37, 6C:15	4G:12, 5G:6, 6G:1
Chordata	Actinopteri	Tetraodontiformes	Tetraodontidae	Tylerius	Tylerius spinosissimus	AP011939.1	16462	4A:76, 5A:30, 6A:9, 7A:1, 9A:1, 10A:1	4T:36, 5T:11, 6T:5, 7T:1	4C:78, 5C:36, 6C:11, 7C:2, 8C:1	4G:23, 5G:10, 6G:3, 7G:1
Chordata	Amphibia	Anura	Calyptocephalellidae	Calyptocephallela	Calyptocephallela gayi	JF703228.1	17994	4A:70, 5A:29, 6A:7, 7A:3	4T:43, 5T:18, 6T:5, 7T:1	4C:89, 5C:25, 6C:7, 7C:9, 8C:1, 9C:3, 10C:2	4G:25, 5G:4, 6G:2, 7G:1
Arthropoda	Insecta	Lepidoptera	Nymphalidae	Calinaga	Calinaga davidis	NC_015480.1	15267	4A:137, 5A:45, 6A:24, 7A:11, 8A:3, 9A:8, 10A:2, 11A:1	4T:163, 5T:79, 6T:36, 7T:22, 8T:12, 9T:5, 10T:2, 19T:1	4C:20, 5C:9, 6C:3, 7C:1	4G:4, 5G:2, 6G:1
Chordata	Actinopteri	Anguilliformes	Nemichthyidae	Avocettina	Avocettina infans	AP010855.2	16680	4A:52, 5A:22, 6A:4, 9A:1	4T:39, 5T:18, 6T:4, 7T:2, 9T:1	4C:55, 5C:31, 6C:9, 7C:3	4G:41, 5G:17, 6G:3, 7G:4, 13G:1
Chordata	Actinopteri	Anguilliformes	Nemichthyidae	Labichthys	Labichthys carinatus	AP010856.2	16683	4A:54, 5A:19, 6A:5	4T:35, 5T:21, 6T:4, 7T:2, 9T:1	4C:53, 5C:27, 6C:8, 7C:4	4G:36, 5G:16, 6G:3, 7G:2
Chordata	Actinopteri	Anguilliformes	Serrivomeridae	Stemonidium	Stemonidium hypomelas	AP010858.2	16566	4A:89, 5A:17, 6A:6, 7A:3	4T:48, 5T:10, 6T:3, 7T:2, 8T:1	4C:74, 5C:23, 6C:10, 7C:2	4G:30, 5G:11, 6G:4
Arthropoda	Arachnida	Mesostigmata	Ologamasidae	Stylochyrus	Stylochyrus rarior	NC_013474.2	14900	4A:130, 5A:67, 6A:27, 7A:10, 8A:4, 9A:1, 10A:1, 11A:1	4T:116, 5T:56, 6T:16, 7T:5, 8T:1, 9T:1, 10T:1	4C:42, 5C:16, 6C:3, 7C:3	4G:6, 5G:4, 6G:2
Chordata	Actinopteri	Anguilliformes	Anguillidae	Anguilla	Anguilla bicolor	AP007237.3	16693	4A:112, 5A:40, 6A:7, 7A:5, 8A:1	4T:34, 5T:9, 6T:1, 8T:1	4C:54, 5C:12, 6C:6, 7C:2	4G:13, 5G:6, 10G:1
Chordata	Actinopteri	Cypriniformes	Xenocyprididae	Macrochirichthys	Macrochirichthys macrochirus	AP011234.1	16857	4A:77, 5A:41, 6A:8, 7A:5	4T:59, 5T:16, 6T:3, 7T:2	4C:62, 5C:21, 6C:5	4G:20, 5G:9, 6G:3
Chordata	Actinopteri	Cypriniformes	Leptobarbidae	Leptobarbus	Leptobarbus hoevenii	AP011286.1	16552	4A:77, 5A:28, 6A:7, 7A:5	4T:40, 5T:7, 6T:1, 8T:1	4C:65, 5C:30, 6C:7	4G:12, 5G:6
Chordata	Actinopteri	Cypriniformes	Danionidae	Cabdio	Cabdio morar	AP011335.1	16418	4A:65, 5A:17, 6A:3, 7A:3	4T:34, 5T:6, 6T:4	4C:61, 5C:33, 6C:7, 7C:1	4G:33, 5G:5, 6G:4
Chordata	Actinopteri	Cypriniformes	Danionidae	Horadandia	Horadandia atukorali	AP011400.1	16735	4A:92, 5A:31, 6A:12, 7A:3, 9A:1	4T:58, 5T:18, 6T:4	4C:53, 5C:14, 6C:2, 7C:1	4G:17, 5G:7, 6G:2
Chordata	Actinopteri	Cypriniformes	Danionidae	Microdevario	Microdevario nanus	AP011402.1	16772	4A:87, 5A:27, 6A:5, 7A:5	4T:82, 5T:15, 6T:10, 7T:2	4C:57, 5C:22, 6C:4, 7C:2	4G:18, 5G:9
Chordata	Actinopteri	Cypriniformes	Danionidae	Boraras	Boraras maculatus	AP011420.1	15640	4A:93, 5A:31, 6A:11, 7A:3	4T:73, 5T:23, 6T:10, 7T:1, 8T:1, 9T:1	4C:42, 5C:12, 6C:4	4G:17, 5G:7, 6G:3
Chordata	Actinopteri	Cypriniformes	Danionidae	Luciosoma	Luciosoma setigerum	AP011423.1	15637	4A:68, 5A:23, 6A:6, 7A:4	4T:57, 5T:14	4C:47, 5C:21, 6C:6, 7C:3	4G:24, 5G:3, 6G:2
Chordata	Actinopteri	Cypriniformes	Danionidae	Barilius	Barilius bendelisis	AP011433.1	16529	4A:60, 5A:13, 6A:1, 7A:2	4T:68, 5T:8, 6T:2, 7T:2, 8T:2	4C:73, 5C:26, 6C:5, 7C:2	4G:41, 5G:9, 6G:4, 7G:1
Chordata	Actinopteri	Cypriniformes	Danionidae	Trigonostigma	Trigonostigma espei	AP011449.1	17162	4A:80, 5A:33, 6A:14, 7A:3	4T:67, 5T:15, 6T:4, 7T:1	4C:46, 5C:21, 6C:5	4G:19, 5G:7
Arthropoda	Insecta	Neuroptera	Myrmeleontidae	Libelloides	Libelloides macaronius	FR669150.1	15890	4A:130, 5A:55, 6A:28, 7A:12, 8A:5, 10A:4, 11A:1	4T:112, 5T:24, 6T:10, 7T:3, 8T:3	4C:18, 5C:6, 6C:3	4G:4, 5G:2
Arthropoda	Malacostraca	Decapoda	Nephropidae	Homarus	Homarus americanus	NC_015607.1	16432	4A:138, 5A:45, 6A:17, 7A:11, 8A:2	4T:148, 5T:74, 6T:25, 7T:11, 9T:1, 11T:1	4C:17, 5C:3	4G:10, 5G:1
Hemichordata	Pterobranchia	Rhabdopleurida	Rhabdopleuridae	Rhabdopleura	Rhabdopleura compacta	FN908482.1	15814	4A:25, 5A:8, 6A:4	4T:286, 5T:133, 6T:74, 7T:38, 8T:19, 9T:10, 10T:3, 11T:4, 13T:1	4C:4, 5C:3	4G:68, 5G:35, 6G:8, 7G:8, 8G:3, 9G:1, 11G:1
Cnidaria	Anthozoa	Scleractinia	Fungiacyathidae	Fungiacyathus	Fungiacyathus stephanus	NC_015640.1	19381	4A:88, 5A:30, 6A:8, 7A:4, 9A:2	4T:189, 5T:100, 6T:31, 7T:17, 8T:9, 9T:3, 10T:3, 11T:2	4C:18, 5C:7, 6C:1	4G:95, 5G:41, 6G:15, 7G:6, 8G:3, 9G:2, 10G:1, 11G:1
Bryozoa	Stenolaemata	Tubuliporida	Tubuliporidae	Tubulipora	Tubulipora flabellaris	NC_015646.1	13763	4A:137, 5A:45, 6A:19, 7A:6, 8A:2, 9A:1	4T:185, 5T:59, 6T:26, 7T:12, 8T:4	4C:10, 5C:3, 6C:1	4G:11, 5G:4
Chordata	Actinopteri	Characiformes	Ctenoluciidae	Boulengerella	Boulengerella maculata	AB070207.1	16446	4A:60, 5A:21, 6A:9, 7A:4, 8A:1	4T:47, 5T:17, 6T:6, 7T:2, 10T:1	4C:80, 5C:36, 6C:9, 7C:1	4G:19, 5G:9, 6G:1
Chordata	Actinopteri	Characiformes	Distichodontidae	Distichodus	Distichodus sexfasciatus	AB070242.1	16555	4A:69, 5A:30, 6A:8, 7A:2	4T:46, 5T:8, 6T:2, 7T:1	4C:69, 5C:33, 6C:9, 8C:1	4G:13, 5G:2
Chordata	Actinopteri	Gymnotiformes	Gymnotidae	Electrophorus	Electrophorus electricus	AP011978.1	16913	4A:91, 5A:33, 6A:6, 7A:4, 8A:1	4T:75, 5T:23, 6T:6	4C:63, 5C:25, 6C:11, 7C:3, 8C:2	4G:13, 5G:7, 6G:2, 7G:1
Chordata	Actinopteri	Gymnotiformes	Gymnotidae	Gymnotus	Gymnotus carapo	AP011979.1	16713	4A:92, 5A:35, 6A:6, 7A:1, 8A:2	4T:65, 5T:14, 6T:5, 8T:1	4C:70, 5C:27, 6C:3, 7C:2	4G:8, 5G:3
Chordata	Actinopteri	Gymnotiformes	Rhamphichthyidae	Gymnorhamphichthys	Gymnorhamphichthys sp.	AP011980.1	16556	4A:80, 5A:26, 6A:4, 7A:1	4T:45, 5T:8, 6T:1, 7T:1	4C:76, 5C:45, 6C:20, 7C:1, 8C:1	4G:11, 5G:6, 6G:1
Chordata	Actinopteri	Characiformes	Acestrorhynchidae	Acestrorhynchus	Acestrorhynchus sp.	AP011981.1	16758	4A:77, 5A:32, 6A:8, 7A:2, 8A:1	4T:73, 5T:17, 6T:10, 7T:6, 8T:2, 9T:1	4C:64, 5C:40, 6C:17, 7C:1	4G:22, 5G:7, 6G:2
Chordata	Actinopteri	Characiformes	Acestrorhamphidae	Astyanax	Astyanax mexicanus	AP011982.1	16682	4A:76, 5A:32, 6A:9, 7A:3, 8A:1	4T:76, 5T:19, 6T:2, 7T:2, 8T:2	4C:67, 5C:19, 6C:6, 7C:1, 8C:2, 9C:1	4G:14, 5G:11
Chordata	Actinopteri	Characiformes	Gasteropelecidae	Carnegiella	Carnegiella strigata	AP011983.1	17852	4A:85, 5A:32, 6A:6, 7A:3, 8A:2, 10A:1	4T:131, 5T:38, 6T:14, 7T:7, 8T:3, 9T:1	4C:48, 5C:19, 6C:4, 7C:4, 9C:1, 10C:1	4G:12, 5G:11
Chordata	Actinopteri	Characiformes	Chilodontidae	Chilodus	Chilodus punctatus	AP011984.1	16869	4A:75, 5A:34, 6A:9, 7A:2, 8A:1	4T:79, 5T:20, 6T:8, 8T:1	4C:73, 5C:23, 6C:5, 7C:1	4G:18, 5G:5
Chordata	Actinopteri	Characiformes	Citharinidae	Citharinus	Citharinus congicus	AP011985.1	16453	4A:71, 5A:31, 6A:11, 7A:2, 8A:1	4T:37, 5T:4, 6T:4	4C:80, 5C:47, 6C:11	4G:10, 5G:2
Chordata	Actinopteri	Characiformes	Crenuchidae	Crenuchus	Crenuchus spilurus	AP011986.1	16361	4A:78, 5A:42, 6A:11, 7A:4	4T:99, 5T:32, 6T:6, 7T:1, 8T:1	4C:56, 5C:15, 6C:3, 7C:1	4G:11, 5G:7, 6G:1
Chordata	Actinopteri	Characiformes	Ctenoluciidae	Ctenolucius	Ctenolucius hujeta	AP011987.1	16599	4A:69, 5A:28, 6A:9, 7A:1, 8A:1	4T:69, 5T:29, 6T:7, 7T:2, 8T:1, 10T:1	4C:76, 5C:24, 6C:8, 7C:3	4G:13, 5G:8, 6G:1
Chordata	Actinopteri	Characiformes	Curimatidae	Curimatopsis	Curimatopsis evelynae	AP011988.1	16779	4A:70, 5A:31, 6A:7, 7A:2	4T:59, 5T:16, 6T:5, 7T:3, 8T:1	4C:67, 5C:37, 6C:9, 7C:4, 8C:2	4G:28, 5G:11, 6G:1
Chordata	Actinopteri	Characiformes	Characidae	Hydrolycus	Hydrolycus scomberoides	AP011989.1	16548	4A:66, 5A:30, 6A:8, 7A:2	4T:28, 5T:4, 6T:1, 7T:2, 8T:1	4C:94, 5C:41, 6C:10, 7C:1, 8C:1	4G:22, 5G:9, 6G:2
Chordata	Actinopteri	Characiformes	Hepsetidae	Hepsetus	Hepsetus odoe	AP011991.1	16803	4A:62, 5A:33, 6A:9, 7A:1, 9A:1	4T:43, 5T:18, 6T:1, 7T:2	4C:80, 5C:55, 6C:13, 7C:2, 18C:1	4G:15, 5G:14, 6G:1
Chordata	Actinopteri	Characiformes	Erythrinidae	Hoplias	Hoplias malabaricus	AP011992.1	16638	4A:80, 5A:31, 6A:9, 7A:1	4T:76, 5T:17, 6T:2, 7T:2, 11T:1	4C:85, 5C:40, 6C:9, 7C:1	4G:13, 5G:10
Chordata	Actinopteri	Characiformes	Anostomidae	Leporinus	Leporinus affinis	AP011994.1	16259	4A:80, 5A:25, 6A:8, 7A:3, 8A:1	4T:47, 5T:14, 6T:5, 9T:1	4C:70, 5C:34, 6C:3, 8C:1	4G:21, 5G:10, 6G:1
Chordata	Actinopteri	Characiformes	Parodontidae	Apareiodon	Apareiodon affinis	AP011998.1	16679	4A:78, 5A:28, 6A:9, 7A:1	4T:62, 5T:14, 6T:2, 7T:1, 9T:1	4C:81, 5C:33, 6C:9	4G:22, 5G:7, 6G:1
Chordata	Actinopteri	Characiformes	Serrasalmidae	Pygocentrus	Pygocentrus nattereri	AP012000.1	16706	4A:75, 5A:27, 6A:7, 7A:1	4T:38, 5T:9, 6T:3, 8T:1	4C:94, 5C:52, 6C:13, 7C:1	4G:18, 5G:11, 6G:1
Chordata	Actinopteri	Siluriformes	Doradidae	Amblydoras	Amblydoras gonzalezi	AP012001.1	16505	4A:87, 5A:30, 6A:4, 7A:2	4T:42, 5T:11, 6T:2, 7T:1, 9T:1	4C:71, 5C:24, 6C:12, 7C:2	4G:11, 5G:6, 7G:1
Chordata	Actinopteri	Siluriformes	Amphiliidae	Amphilius	Amphilius sp.	AP012002.1	16539	4A:83, 5A:22, 6A:5, 7A:2	4T:58, 5T:18, 6T:3, 7T:1	4C:88, 5C:39, 6C:16, 7C:1, 8C:4	4G:20, 5G:10, 6G:2, 7G:2
Chordata	Actinopteri	Siluriformes	Astroblepidae	Astroblepus	Astroblepus sp.	AP012004.1	16565	4A:79, 5A:25, 6A:15, 7A:2	4T:49, 5T:17, 6T:1, 7T:2	4C:62, 5C:26, 6C:13	4G:21, 5G:13, 6G:2, 7G:1
Chordata	Actinopteri	Siluriformes	Auchenoglanididae	Auchenoglanis	Auchenoglanis occidentalis	AP012005.1	16535	4A:88, 5A:27, 6A:5, 7A:2	4T:34, 5T:9, 6T:2, 7T:1	4C:78, 5C:29, 6C:9, 7C:1	4G:10, 5G:3, 6G:1
Chordata	Actinopteri	Siluriformes	Aspredinidae	Bunocephalus	Bunocephalus coracoideus	AP012006.1	16477	4A:78, 5A:28, 6A:6, 7A:4	4T:81, 5T:17, 6T:4, 7T:3, 8T:1, 10T:1	4C:65, 5C:22, 6C:12, 7C:2	4G:18, 5G:5, 6G:1, 7G:1
Chordata	Actinopteri	Siluriformes	Chacidae	Chaca	Chaca bankanensis	AP012008.1	16754	4A:71, 5A:27, 6A:9, 7A:1	4T:27, 5T:8, 6T:2, 9T:1	4C:75, 5C:33, 6C:8, 7C:2, 8C:1, 10C:1, 11C:1	4G:18, 5G:8, 6G:1
Chordata	Actinopteri	Siluriformes	Clariidae	Clarias	Clarias sp.	AP012010.1	16508	4A:85, 5A:32, 6A:4, 7A:2	4T:34, 5T:11, 6T:1	4C:62, 5C:31, 6C:3	4G:12, 5G:7, 6G:1
Chordata	Actinopteri	Siluriformes	Diplomystidae	Diplomystes	Diplomystes nahuelbutaensis	AP012011.1	16506	4A:76, 5A:22, 6A:2, 7A:1	4T:56, 5T:18, 6T:2, 7T:2, 10T:1	4C:62, 5C:38, 6C:13	4G:20, 5G:5, 6G:1, 7G:1
Chordata	Actinopteri	Siluriformes	Heteropneustidae	Heteropneustes	Heteropneustes fossilis	AP012013.1	16489	4A:98, 5A:21, 6A:5, 7A:2	4T:51, 5T:9, 6T:2, 7T:1	4C:70, 5C:23, 6C:8	4G:5, 5G:7, 6G:1
Chordata	Actinopteri	Siluriformes	Cetopsidae	Helogenes	Helogenes marmoratus	AP012014.1	16616	4A:87, 5A:34, 6A:8	4T:67, 5T:5, 6T:2, 10T:1, 11T:1	4C:56, 5C:13, 6C:7, 7C:2	4G:14, 5G:7
Chordata	Actinopteri	Siluriformes	Amblycipitidae	Liobagrus	Liobagrus reinii	AP012015.1	16636	4A:90, 5A:35, 6A:2, 7A:2	4T:43, 5T:13, 6T:1, 7T:1, 8T:1, 9T:1, 11T:2	4C:88, 5C:49, 6C:9, 7C:3, 8C:1	4G:13, 5G:9, 6G:1
Chordata	Actinopteri	Siluriformes	Malapteruridae	Malapterurus	Malapterurus electricus	AP012016.1	16504	4A:73, 5A:33, 6A:4, 8A:1	4T:57, 5T:13, 6T:3, 7T:1	4C:71, 5C:38, 6C:11, 7C:2	4G:13, 5G:3
Chordata	Actinopteri	Siluriformes	Schilbidae	Pareutropius	Pareutropius debauwi	AP012017.1	16521	4A:78, 5A:32, 6A:8, 7A:2	4T:42, 5T:8, 6T:4, 7T:1	4C:80, 5C:45, 6C:9, 7C:3, 8C:1	4G:21, 5G:9, 7G:2
Chordata	Actinopteri	Siluriformes	Pangasiidae	Pangasius	Pangasius larnaudii	AP012018.1	16471	4A:85, 5A:27, 6A:5, 7A:1	4T:35, 5T:10, 6T:2	4C:87, 5C:36, 6C:12, 7C:2	4G:15, 5G:11, 6G:1
Chordata	Actinopteri	Siluriformes	Plotosidae	Plotosus	Plotosus japonicus	AP012020.1	16590	4A:79, 5A:31, 6A:7, 7A:1	4T:34, 5T:11	4C:65, 5C:27, 6C:12, 7C:3, 8C:1	4G:19, 5G:7, 6G:3
Chordata	Actinopteri	Siluriformes	Loricariidae	Pterygoplichthys	Pterygoplichthys disjunctivus	AP012021.1	16521	4A:81, 5A:32, 6A:9, 7A:1	4T:55, 5T:14, 6T:3	4C:66, 5C:22, 6C:5, 7C:1	4G:10, 5G:3
Chordata	Actinopteri	Siluriformes	Auchenipteridae	Tetranematichthys	Tetranematichthys quadrifilis	AP012025.1	16533	4A:88, 5A:27, 6A:5, 7A:1	4T:47, 5T:12, 6T:6, 7T:2	4C:63, 5C:29, 6C:20, 7C:1	4G:12, 5G:8, 6G:2, 7G:1, 9G:1
Chordata	Actinopteri	Siluriformes	Trichomycteridae	Trichomycterus	Trichomycterus areolatus	AP012026.1	16586	4A:75, 5A:27, 6A:4, 7A:2	4T:47, 5T:6, 6T:3, 10T:1	4C:76, 5C:28, 6C:7	4G:27, 5G:12, 6G:2
Chordata	Actinopteri	Acropomatiformes	Pentacerotidae	Histiopterus	Histiopterus typus	AP006807.1	16506	4A:62, 5A:23, 6A:5, 7A:1	4T:38, 5T:14, 6T:2, 11T:1	4C:86, 5C:53, 6C:14, 9C:1	4G:22, 5G:14
Chordata	Actinopteri	Scombriformes	Arripidae	Arripis	Arripis trutta	AP006810.1	17244	4A:61, 5A:27, 6A:8	4T:60, 5T:12, 6T:1, 8T:1	4C:69, 5C:37, 6C:11, 7C:3	4G:25, 5G:8, 6G:2
Arthropoda	Insecta	Hemiptera	Cercopidae	Abidama	Abidama producta	NC_015799.1	15277	4A:168, 5A:91, 6A:38, 7A:23, 8A:16, 9A:6, 10A:4, 11A:2, 15A:1, 18A:1, 23A:1	4T:72, 5T:22, 6T:7, 7T:2	4C:3, 5C:6, 6C:1	4G:1
Arthropoda	Insecta	Lepidoptera	Noctuidae	Sesamia	Sesamia inferens	NC_015835.1	15413	4A:151, 5A:45, 6A:25, 7A:10, 8A:5, 9A:3, 10A:4, 11A:2, 16A:1	4T:165, 5T:64, 6T:26, 7T:16, 8T:6, 9T:1, 10T:2, 11T:1, 13T:1, 15T:1, 19T:1	4C:21, 5C:6, 6C:3	4G:2
Arthropoda	Insecta	Hemiptera	Reduviidae	Agriosphodrus	Agriosphodrus dohrni	NC_015842.1	16470	4A:146, 5A:69, 6A:26, 7A:13, 8A:6	4T:89, 5T:34, 6T:12, 7T:1, 8T:2, 9T:1	4C:25, 5C:8, 6C:2, 9C:1	4G:8, 5G:4, 6G:2
Onychophora	Udeonychophora	Euonychophora	Peripatopsidae	Peripatoides	Peripatoides sympatrica	JF800075.1	14088	4A:134, 5A:50, 6A:13, 7A:9, 8A:6	4T:168, 5T:56, 6T:23, 7T:14, 8T:9, 10T:1	4C:4, 10C:1	4G:4, 5G:2, 7G:1, 8G:1, 10G:1
Chordata	Actinopteri	Mugiliformes	Mugilidae	Joturus	Joturus pichardi	JF911708.1	15762	4A:61, 5A:21, 6A:3, 7A:1	4T:48, 5T:18, 6T:2, 7T:1	4C:64, 5C:52, 6C:10, 7C:1	4G:16, 5G:5, 6G:1
Chordata	Actinopteri	Mugiliformes	Mugilidae	Pseudomyxus	Pseudomyxus capensis	JF911711.1	17132	4A:77, 5A:30, 6A:8, 7A:1	4T:63, 5T:25, 6T:2, 7T:1	4C:75, 5C:38, 6C:13, 7C:2	4G:17, 5G:4, 6G:1
Chordata	Actinopteri	Mugiliformes	Mugilidae	Squalomugil	Squalomugil nasutus	JF911714.1	16974	4A:73, 5A:21, 6A:4, 7A:3	4T:66, 5T:17, 6T:3, 7T:1, 8T:1, 9T:1	4C:79, 5C:26, 6C:12, 7C:1	4G:14, 5G:7, 6G:1
Chordata	Actinopteri	Mugiliformes	Mugilidae	Minimugil	Minimugil cascasia	JF911715.1	17119	4A:77, 5A:27, 6A:4, 7A:3	4T:35, 5T:18, 6T:3, 7T:2, 8T:1	4C:71, 5C:43, 6C:12, 7C:2	4G:23, 5G:10, 6G:2
Chordata	Aves	Accipitriformes	Accipitridae	Spilornis	Spilornis cheela	NC_015887.1	18291	4A:90, 5A:27, 6A:3, 7A:3	4T:21, 5T:7, 6T:2, 8T:1, 9T:1	4C:94, 5C:50, 6C:14, 7C:1, 8C:1, 9C:1	4G:14, 5G:6, 7G:2
Chordata	Actinopteri	Anguilliformes	Protanguillidae	Protanguilla	Protanguilla palau	AP011809.1	15725	4A:86, 5A:38, 6A:5, 7A:1	4T:28, 5T:10, 6T:3, 7T:1	4C:58, 5C:27, 6C:6	4G:17, 5G:3, 6G:2, 7G:1
Arthropoda	Insecta	Lepidoptera	Crambidae	Cnaphalocrocis	Cnaphalocrocis medinalis	NC_015985.1	15388	4A:153, 5A:55, 6A:22, 7A:15, 8A:1, 9A:2, 10A:2, 11A:4, 12A:1	4T:172, 5T:79, 6T:26, 7T:18, 8T:9, 9T:4, 10T:2, 11T:2, 12T:1, 13T:2	4C:8, 5C:4, 6C:2, 7C:1	4G:3, 5G:1
Arthropoda	Insecta	Lepidoptera	Lycaenidae	Protantigius	Protantigius superans	NC_016016.1	15248	4A:130, 5A:48, 6A:16, 7A:8, 8A:5, 9A:3, 10A:1, 11A:3	4T:166, 5T:69, 6T:40, 7T:10, 8T:9, 9T:1, 10T:2, 11T:2, 19T:1	4C:11, 5C:8, 6C:2	4G:1, 5G:1
Platyhelminthes	Monogenea	Mazocraeidea	Microcotylidae	Polylabris	Polylabris halichoeres	NC_016057.1	15527	4A:64, 5A:21, 6A:12, 7A:5, 8A:2	4T:168, 5T:67, 6T:37, 7T:11, 8T:10, 9T:10, 10T:4, 11T:2, 12T:1	4C:1, 5C:1	4G:20, 5G:1
Ctenophora	Tentaculata	Lobata	Bolinopsidae	Mnemiopsis	Mnemiopsis leidyi	NC_016117.1	10326	4A:31, 5A:12, 6A:3, 7A:2	4T:256, 5T:126, 6T:66, 7T:38, 8T:32, 9T:12, 10T:8, 11T:9, 12T:2, 14T:1, 15T:3, 19T:1, 21T:1	4C:2	4G:4
Nematoda	Chromadorea	Rhabditida	Physalopteridae	Heliconema	Heliconema longissimum	NC_016127.1	13610	4A:60, 5A:18, 6A:5, 7A:2, 8A:1, 9A:1, 10A:1	4T:268, 5T:142, 6T:85, 7T:56, 8T:31, 9T:19, 10T:8, 11T:2, 12T:4, 14T:3, 17T:1, 18T:1	4C:3, 5C:1	4G:13, 5G:6, 6G:4
Nematoda	Chromadorea	Rhabditida	Cucullanidae	Cucullanus	Cucullanus robustus	NC_016128.1	13972	4A:46, 5A:28, 6A:6, 7A:1	4T:222, 5T:118, 6T:50, 7T:36, 8T:17, 9T:10, 10T:6, 11T:2, 12T:1, 21T:1	4C:4, 5C:2	4G:43, 5G:15, 6G:11, 7G:2, 10G:1
Nematoda	Chromadorea	Rhabditida	Oxyuridae	Wellcomia	Wellcomia siamensis	NC_016129.1	14128	4A:36, 5A:16, 6A:10, 7A:3, 8A:2, 9A:3, 11A:1, 12A:1, 18A:1	4T:230, 5T:124, 6T:80, 7T:52, 8T:33, 9T:27, 10T:17, 11T:13, 12T:7, 13T:5, 14T:2, 18T:2, 23T:1, 27T:1		4G:17, 5G:6, 6G:5
Cnidaria	Scyphozoa	Semaeostomeae	Cyaneidae	Cyanea	Cyanea capillata	JN700937.1	16202	4A:102, 5A:33, 6A:17, 7A:4	4T:172, 5T:79, 6T:30, 7T:12, 8T:3, 9T:2, 10T:1	4C:9, 5C:4	4G:16, 5G:4, 6G:1, 7G:1
Cnidaria	Hydrozoa	Leptothecata	Obeliidae	Laomedea	Laomedea flexuosa	JN700945.1	16075	4A:79, 5A:28, 6A:9, 7A:8	4T:163, 5T:63, 6T:40, 7T:10, 8T:9, 9T:1	4C:10, 5C:5, 6C:2	4G:18, 5G:6, 6G:1
Cnidaria	Staurozoa	Stauromedusae	Lucernariidae	Lucernaria	Lucernaria janetae	JN700946.1	14692	4A:47, 5A:14, 6A:5	4T:111, 5T:51, 6T:14, 7T:6, 8T:1	4C:55, 5C:17, 6C:4	4G:48, 5G:17, 6G:7, 7G:1
Cnidaria	Hydrozoa	Anthoathecata	Bougainvilliidae	Nemopsis	Nemopsis bachei	JN700947.1	14431	4A:77, 5A:25, 6A:7, 7A:3, 8A:1	4T:196, 5T:83, 6T:38, 7T:16, 8T:8, 9T:3	4C:10, 5C:2	4G:16, 5G:6, 6G:1
Cnidaria	Hydrozoa	Leptothecata	Obeliidae	Obelia	Obelia longissima	JN700948.1	15194	4A:71, 5A:28, 6A:8, 7A:8	4T:158, 5T:58, 6T:40, 7T:10, 8T:8, 9T:2	4C:8, 5C:4, 6C:2	4G:16, 5G:5, 6G:1
Cnidaria	Hydrozoa	Anthoathecata	Pennariidae	Pennaria	Pennaria disticha	JN700950.1	14051	4A:82, 5A:40, 6A:6, 7A:4, 8A:4	4T:212, 5T:86, 6T:40, 7T:21, 8T:11, 9T:4, 10T:1	4C:2, 5C:1	4G:3, 5G:1, 6G:1
Chordata	Mammalia	Dermoptera	Cynocephalidae	Galeopterus	Galeopterus variegatus	JN800721.1	16745	4A:73, 5A:30, 6A:6, 7A:4, 8A:1, 9A:1	4T:39, 5T:8, 6T:2, 7T:1, 9T:1	4C:71, 5C:30, 6C:9, 7C:5	4G:13, 5G:4, 10G:1
Arthropoda	Malacostraca	Amphipoda	Pontogeneiidae	Gondogeneia	Gondogeneia antarctica	JN827386.1	18424	4A:151, 5A:58, 6A:29, 7A:11, 8A:3, 12A:1	4T:165, 5T:53, 6T:23, 7T:10, 8T:3, 9T:4, 13T:1	4C:37, 5C:11, 6C:6, 7C:1	4G:6, 5G:1, 6G:2
Arthropoda	Insecta	Diptera	Ptychopteridae	Bittacomorphella	Bittacomorphella fenderiana	JN861745.1	15609	4A:155, 5A:80, 6A:17, 7A:13, 8A:7, 9A:4, 10A:1	4T:167, 5T:61, 6T:32, 7T:9, 8T:8, 9T:1, 11T:1	4C:29, 5C:9, 6C:3, 8C:1	4G:6, 5G:5, 6G:1, 7G:1
Cnidaria	Scyphozoa	Coronatae	Linuchidae	Linuche	Linuche unguiculata	JN700939.1	12129	4A:44, 5A:11, 6A:3, 7A:2, 8A:1	4T:111, 5T:32, 6T:7, 7T:5, 8T:1	4C:11, 5C:10	4G:28, 5G:9, 6G:1
Arthropoda	Insecta	Diptera	Trichoceridae	Trichocera	Trichocera bimacula	NC_016169.1	16140	4A:148, 5A:71, 6A:19, 7A:11, 8A:5, 9A:2, 29A:1	4T:146, 5T:61, 6T:26, 7T:9, 8T:8, 9T:3, 19T:1	4C:35, 5C:19, 6C:3, 7C:1	4G:11, 5G:3
Arthropoda	Insecta	Diptera	Trichoceridae	Paracladura	Paracladura trichoptera	NC_016173.1	16143	4A:171, 5A:71, 6A:23, 7A:14, 8A:9, 9A:3	4T:154, 5T:66, 6T:37, 7T:10, 8T:7, 9T:2, 10T:3	4C:16, 5C:9, 6C:3	4G:6, 5G:2
Mollusca	Gastropoda	Ellobiida	Ellobiidae	Ovatella	Ovatella vulcani	NC_016175.1	14274	4A:48, 5A:23, 6A:4, 8A:1	4T:109, 5T:38, 6T:13, 7T:3, 8T:1	4C:39, 5C:16, 6C:4, 7C:1	4G:65, 5G:16, 6G:5, 7G:1, 8G:1
Mollusca	Gastropoda	Ellobiida	Ellobiidae	Pedipes	Pedipes pedipes	NC_016179.1	16708	4A:94, 5A:42, 6A:21, 7A:7, 8A:2	4T:161, 5T:67, 6T:23, 7T:19, 8T:4	4C:22, 5C:3, 6C:1	4G:32, 5G:6, 6G:2, 7G:1
Mollusca	Gastropoda	Ellobiida	Trimusculidae	Trimusculus	Trimusculus reticulatus	NC_016193.1	14044	4A:64, 5A:23, 6A:12, 7A:2, 8A:3	4T:126, 5T:64, 6T:23, 7T:8, 8T:1	4C:24, 5C:5, 6C:1	4G:26, 5G:14, 6G:4
Chordata	Actinopteri	Gobiiformes	Gobiidae	Oxuderces	Oxuderces dentatus	NC_016194.1	17116	4A:78, 5A:33, 6A:19, 7A:3, 8A:1	4T:58, 5T:22, 6T:4, 7T:2, 9T:1	4C:88, 5C:31, 6C:12, 7C:2	4G:16, 5G:8, 6G:1
Nematoda	Chromadorea	Rhabditida	Ascarididae	Baylisascaris	Baylisascaris procyonis	NC_016200.1	14781	4A:34, 5A:11, 6A:1, 7A:2	4T:271, 5T:122, 6T:56, 7T:37, 8T:18, 9T:10, 10T:5, 11T:2, 12T:1	4C:4	4G:31, 5G:17, 6G:2, 9G:1
Arthropoda	Insecta	Diptera	Tanyderidae	Protoplasa	Protoplasa fitchii	NC_016202.1	16154	4A:128, 5A:62, 6A:36, 7A:20, 8A:5, 9A:2, 10A:1	4T:169, 5T:58, 6T:37, 7T:9, 8T:9, 9T:6, 10T:1	4C:35, 5C:8, 6C:5	4G:18, 5G:4, 6G:1
Arthropoda	Insecta	Diptera	Pachyneuridae	Cramptonomyia	Cramptonomyia spenceri	NC_016203.1	16274	4A:155, 5A:59, 6A:29, 7A:14, 8A:6, 9A:3, 10A:3	4T:152, 5T:80, 6T:26, 7T:9, 8T:5, 10T:4, 11T:1	4C:34, 5C:19, 6C:5, 7C:1	4G:11, 5G:2, 6G:1
Arthropoda	Insecta	Diptera	Keroplatidae	Arachnocampa	Arachnocampa flava	NC_016204.1	16923	4A:151, 5A:67, 6A:33, 7A:13, 8A:4, 9A:1, 10A:1, 11A:1, 21A:1	4T:222, 5T:91, 6T:36, 7T:14, 8T:9, 9T:3, 10T:4, 11T:5, 21T:1	4C:25, 5C:6	4G:6, 5G:1
Mollusca	Gastropoda	Siphonariida	Siphonariidae	Siphonaria	Siphonaria gigas	NC_016188.1	14518	4A:47, 5A:21, 6A:3, 7A:1	4T:127, 5T:60, 6T:25, 7T:10, 8T:4	4C:10, 5C:2	4G:46, 5G:17, 6G:8
Chordata	Mammalia	Dasyuromorphia	Dasyuridae	Antechinus	Antechinus flavipes	FN666600.1	15485	4A:66, 5A:25, 6A:11, 7A:2, 8A:1	4T:73, 5T:14, 6T:5, 7T:2	4C:45, 5C:13, 6C:1	4G:10, 5G:3
Chordata	Mammalia	Dasyuromorphia	Dasyuridae	Parantechinus	Parantechinus apicalis	FN666601.1	15431	4A:65, 5A:35, 6A:4, 7A:3	4T:51, 5T:20, 6T:2	4C:34, 5C:11, 6C:1	4G:10, 5G:5
Chordata	Mammalia	Dasyuromorphia	Dasyuridae	Planigale	Planigale sp.	FN666602.1	15434	4A:72, 5A:26, 6A:9, 7A:3, 8A:1	4T:72, 5T:15, 6T:3	4C:33, 5C:11, 6C:3	4G:9, 5G:6, 6G:2
Chordata	Mammalia	Dasyuromorphia	Myrmecobiidae	Myrmecobius	Myrmecobius fasciatus	FN666603.1	15351	4A:60, 5A:33, 6A:5, 7A:4, 8A:1	4T:39, 5T:13, 6T:1	4C:43, 5C:18	4G:14, 5G:5, 6G:1
Chordata	Mammalia	Dasyuromorphia	Dasyuridae	Sarcophilus	Sarcophilus harrisii	FN666604.1	15502	4A:70, 5A:31, 6A:5, 7A:1, 8A:2	4T:52, 5T:16, 6T:2, 7T:1, 8T:1	4C:39, 5C:19, 6C:1	4G:8, 5G:5
Chordata	Mammalia	Dasyuromorphia	Dasyuridae	Dasyurus	Dasyurus geoffroii	FN666605.1	15381	4A:66, 5A:28, 6A:8, 7A:2, 8A:1, 9A:1	4T:44, 5T:28, 6T:4	4C:46, 5C:10, 6C:4	4G:7, 5G:2, 6G:1
Mollusca	Cephalopoda	Oegopsida	Bathyteuthidae	Bathyteuthis	Bathyteuthis abyssicola	AP012225.1	20075	4A:151, 5A:60, 6A:29, 7A:17, 8A:6, 9A:2, 10A:2	4T:125, 5T:53, 6T:14, 7T:5, 8T:4	4C:33, 5C:10, 6C:2	4G:6, 5G:3
Mollusca	Cephalopoda	Sepiida	Sepiolidae	Semirossia	Semirossia patagonica	AP012226.1	17086	4A:148, 5A:67, 6A:29, 7A:13, 8A:7, 9A:2, 10A:2	4T:105, 5T:40, 6T:14, 7T:5, 8T:2, 10T:1	4C:29, 5C:10, 6C:3	4G:4, 5G:2
Arthropoda	Insecta	Lepidoptera	Nymphalidae	Fabriciana	Fabriciana nerippe	NC_016419.1	15140	4A:137, 5A:59, 6A:15, 7A:10, 8A:5, 9A:4, 10A:4, 11A:2	4T:168, 5T:84, 6T:27, 7T:21, 8T:10, 9T:2, 10T:4, 11T:2, 17T:1	4C:16, 5C:8, 6C:1	4G:3
Arthropoda	Insecta	Hemiptera	Nabidae	Alloeorhynchus	Alloeorhynchus bakeri	NC_016432.1	15851	4A:142, 5A:67, 6A:19, 7A:9, 8A:4	4T:84, 5T:21, 6T:10, 7T:1, 8T:1	4C:28, 5C:10, 6C:3	4G:13, 6G:2
Platyhelminthes	Rhabditophora	Tricladida	Dugesiidae	Dugesia	Dugesia ryukyuensis	AB618488.1	17015	4A:30, 5A:6, 6A:3	4T:315, 5T:158, 6T:76, 7T:39, 8T:27, 9T:15, 10T:7, 11T:2, 12T:1	4C:3, 5C:5	4G:12, 5G:2
Arthropoda	Malacostraca	Euphausiacea	Euphausiidae	Thysanoessa	Thysanoessa raschii	JN713150.1	14251	4A:118, 5A:39, 6A:14, 7A:10, 8A:5, 9A:2, 11A:1	4T:125, 5T:40, 6T:16, 7T:12, 8T:3, 10T:1	4C:13, 5C:5	4G:8
Cnidaria	Hydrozoa	Anthoathecata	Hydractiniidae	Clava	Clava multicornis	NC_016465.1	16898	4A:93, 5A:38, 6A:6, 7A:5, 8A:3	4T:196, 5T:111, 6T:27, 7T:18, 8T:7, 10T:1	4C:13, 5C:2, 6C:1	4G:18, 5G:3, 6G:2, 7G:1
Cnidaria	Hydrozoa	Limnomedusae	Olindiasidae	Cubaia	Cubaia aphrodite	NC_016467.1	16148	4A:88, 5A:38, 6A:9, 7A:3	4T:163, 5T:66, 6T:21, 7T:8, 8T:3, 9T:2	4C:15, 5C:4	4G:30, 5G:7, 6G:1
Chordata	Actinopteri	Clupeiformes	Clupeidae	Gilchristella	Gilchristella aestuaria	AP011606.1	16137	4A:62, 5A:19, 6A:3, 7A:1	4T:45, 5T:11, 6T:3	4C:72, 5C:38, 6C:13, 7C:1	4G:28, 5G:10, 6G:3
Chordata	Actinopteri	Clupeiformes	Pristigasteridae	Pellona	Pellona ditchela	AP011609.1	16800	4A:76, 5A:34, 6A:10, 7A:3	4T:35, 5T:11, 6T:5	4C:78, 5C:34, 6C:11, 7C:1, 8C:3	4G:21, 5G:8
Chordata	Actinopteri	Clupeiformes	Clupeidae	Hilsa	Hilsa kelee	AP011613.1	14850	4A:33, 5A:10, 6A:1	4T:32, 5T:6, 6T:2	4C:59, 5C:42, 6C:9, 7C:1	4G:38, 5G:10, 6G:5
Chordata	Actinopteri	Clupeiformes	Clupeidae	Anodontostoma	Anodontostoma chacunda	AP011614.1	13848	4A:48, 5A:15, 6A:2	4T:30, 5T:4, 6T:1, 7T:1	4C:65, 5C:29, 6C:10	4G:21, 5G:10, 6G:1
Chordata	Actinopteri	Clupeiformes	Clupeidae	Harengula	Harengula jaguana	NC_016667.1	17158	4A:44, 5A:15, 6A:5	4T:37, 5T:10, 6T:1, 8T:1	4C:63, 5C:46, 6C:8, 7C:1, 8C:1	4G:41, 5G:12, 6G:2
Chordata	Actinopteri	Clupeiformes	Clupeidae	Hyperlophus	Hyperlophus vittatus	NC_016671.1	16653	4A:50, 5A:19, 6A:3	4T:64, 5T:11, 6T:2, 8T:1, 10T:1	4C:73, 5C:41, 6C:6, 7C:1	4G:25, 5G:8, 6G:3
Chordata	Actinopteri	Clupeiformes	Clupeidae	Sprattus	Sprattus antipodum	NC_016673.1	16707	4A:56, 5A:13, 6A:1	4T:36, 5T:8, 6T:1, 7T:1, 10T:1	4C:74, 5C:48, 6C:9, 7C:1	4G:40, 5G:17, 6G:3, 7G:1
Chordata	Actinopteri	Clupeiformes	Clupeidae	Potamalosa	Potamalosa richmondia	NC_016674.1	16681	4A:57, 5A:21, 6A:6, 7A:1	4T:47, 5T:15, 6T:2, 9T:1	4C:79, 5C:43, 6C:10	4G:19, 5G:9, 6G:2
Arthropoda	Pauropoda	Tetramerocerata	Pauropodidae	Pauropus	Pauropus longiramus	NC_016676.1	14487	4A:133, 5A:64, 6A:36, 7A:17, 8A:8, 9A:1, 10A:1, 11A:1	4T:135, 5T:48, 6T:27, 7T:7, 8T:7, 9T:1, 10T:1, 12T:1	4C:35, 5C:18, 6C:8, 9C:1	4G:3, 5G:2
Chordata	Actinopteri	Clupeiformes	Clupeidae	Odaxothrissa	Odaxothrissa losera	NC_016678.1	16730	4A:75, 5A:29, 6A:5, 7A:2	4T:41, 5T:7, 6T:3, 9T:1	4C:85, 5C:39, 6C:11, 7C:2	4G:23, 5G:7
Chordata	Actinopteri	Clupeiformes	Clupeidae	Microthrissa	Microthrissa royauxi	NC_016683.1	16738	4A:74, 5A:27, 6A:4, 7A:2	4T:42, 5T:8, 6T:1, 8T:1	4C:94, 5C:42, 6C:8	4G:25, 5G:8, 6G:1
Chordata	Actinopteri	Gobiiformes	Gobiidae	Trypauchen	Trypauchen vagina	NC_016693.1	16686	4A:76, 5A:31, 6A:5, 7A:2, 8A:1	4T:66, 5T:14, 6T:5, 8T:1	4C:83, 5C:43, 6C:23, 7C:1, 9C:2	4G:15, 5G:8, 6G:1
Chordata	Actinopteri	Clupeiformes	Clupeidae	Konosirus	Konosirus punctatus	NC_016694.1	16698	4A:51, 5A:11, 6A:2	4T:43, 5T:10, 6T:2, 7T:1, 9T:1	4C:69, 5C:36, 6C:7, 7C:1	4G:30, 5G:11, 6G:2, 7G:1
Chordata	Actinopteri	Clupeiformes	Clupeidae	Potamothrissa	Potamothrissa obtusirostris	NC_016698.1	16736	4A:64, 5A:25, 6A:5, 7A:1, 8A:1	4T:58, 5T:14, 6T:4, 8T:1	4C:93, 5C:38, 6C:7, 7C:3	4G:21, 5G:8, 6G:3
Chordata	Actinopteri	Clupeiformes	Clupeidae	Escualosa	Escualosa thoracata	NC_016706.1	16749	4A:47, 5A:15, 7A:1	4T:37, 5T:10, 6T:1, 10T:1	4C:78, 5C:41, 6C:12, 7C:2	4G:33, 5G:15, 6G:5
Chordata	Actinopteri	Clupeiformes	Clupeidae	Ethmidium	Ethmidium maculatum	NC_016710.1	16741	4A:51, 5A:13, 6A:7, 7A:1	4T:25, 5T:9, 6T:1	4C:78, 5C:40, 6C:9, 7C:1	4G:25, 5G:9, 6G:1
Chordata	Actinopteri	Clupeiformes	Clupeidae	Gudusia	Gudusia chapra	NC_016715.1	16554	4A:70, 5A:23, 6A:4, 7A:3	4T:42, 5T:8, 6T:3, 7T:1	4C:74, 5C:42, 6C:7, 7C:4	4G:9, 5G:4, 6G:1
Chordata	Actinopteri	Clupeiformes	Clupeidae	Ehirava	Ehirava fluviatilis	NC_016717.1	16689	4A:59, 5A:29, 6A:9, 7A:4, 8A:1	4T:46, 5T:10, 6T:2, 7T:1, 9T:1	4C:69, 5C:26, 6C:6, 7C:1	4G:13, 5G:8, 6G:1
Chordata	Actinopteri	Clupeiformes	Clupeidae	Tenualosa	Tenualosa thibaudeaui	NC_016719.1	16560	4A:53, 5A:9, 6A:4, 7A:2	4T:37, 5T:11, 6T:3, 7T:1, 8T:1	4C:75, 5C:46, 6C:6, 7C:4, 8C:1	4G:31, 5G:10, 6G:3
Chordata	Actinopteri	Clupeiformes	Clupeidae	Clupeichthys	Clupeichthys goniognathus	NC_016721.1	16712	4A:55, 5A:32, 6A:8, 7A:3, 8A:1	4T:59, 5T:15, 6T:3, 8T:1	4C:70, 5C:36, 6C:13	4G:30, 5G:12, 6G:2, 7G:2
Bryozoa	Gymnolaemata	Cheilostomatida	Flustridae	Flustra	Flustra foliacea	NC_016722.1	16089	4A:61, 5A:19, 6A:2, 7A:1, 9A:1	4T:193, 5T:74, 6T:38, 7T:13, 8T:8, 9T:2	4C:8, 5C:2	4G:42, 5G:19, 6G:7
Chordata	Aves	Anseriformes	Anatidae	Mergus	Mergus squamatus	NC_016723.1	16595	4A:63, 5A:22, 6A:6, 7A:3	4T:30, 5T:6, 6T:1	4C:89, 5C:44, 6C:13, 7C:1, 8C:1, 9C:2	4G:19, 5G:3, 6G:2, 7G:1
Chordata	Actinopteri	Clupeiformes	Clupeidae	Sundasalanx	Sundasalanx praecox	NC_016725.1	16748	4A:68, 5A:28, 6A:4, 7A:2	4T:52, 5T:14, 6T:5, 9T:1	4C:84, 5C:35, 6C:10, 7C:2	4G:21, 5G:9, 6G:2, 7G:1
Chordata	Actinopteri	Clupeiformes	Clupeidae	Sardinella	Sardinella albella	NC_016726.1	16652	4A:46, 5A:13, 6A:2	4T:37, 5T:9, 6T:1	4C:63, 5C:29, 6C:12	4G:29, 5G:12, 6G:4
Acanthocephala	Archiacanthocephala	Oligacanthorhynchida	Oligacanthorhynchidae	Oncicola	Oncicola luehei	NC_016754.1	14281	4A:25, 5A:9, 6A:2, 11A:1	4T:113, 5T:41, 6T:13, 7T:3, 8T:4	4C:10, 5C:1, 6C:1	4G:86, 5G:35, 6G:21, 7G:2, 9G:1
Arthropoda	Insecta	Diptera	Fergusoninidae	Fergusonina	Fergusonina taylori	NC_016865.1	16000	4A:181, 5A:78, 6A:41, 7A:13, 8A:3, 9A:1	4T:147, 5T:55, 6T:27, 7T:9, 8T:5, 9T:3, 11T:1	4C:18, 5C:4, 6C:3	5G:1
Chordata	Mammalia	Chiroptera	Vespertilionidae	Lasiurus	Lasiurus borealis	NC_016873.1	17048	4A:75, 5A:38, 6A:10, 7A:6	4T:74, 5T:18, 6T:9, 7T:1, 8T:1	4C:44, 5C:11, 6C:3	4G:9, 5G:8, 6G:1
Mollusca	Gastropoda	Lepetellida	Fissurellidae	Fissurella	Fissurella volcano	JN790612.1	17575	4A:82, 5A:20, 6A:11, 7A:2, 8A:2	4T:152, 5T:55, 6T:24, 7T:11, 8T:5, 9T:3, 10T:4	4C:8, 5C:2	4G:99, 5G:31, 6G:8, 7G:4
Arthropoda	Malacostraca	Decapoda	Cambaridae	Procambarus	Procambarus clarkii	NC_016926.1	15928	4A:83, 5A:32, 6A:15, 7A:2, 8A:1, 10A:1	4T:176, 5T:63, 6T:40, 7T:13, 8T:9, 9T:1, 10T:1	4C:2, 5C:1, 6C:1	4G:37, 5G:14, 6G:4, 7G:3
Platyhelminthes	Monogenea	Mazocraeidea	Chauhaneidae	Pseudochauhanea	Pseudochauhanea macrorchis	NC_016950.1	15031	4A:83, 5A:37, 6A:11, 7A:7, 8A:3	4T:192, 5T:66, 6T:38, 7T:14, 8T:13, 9T:7	4C:3, 5C:3	4G:17, 5G:5, 6G:1, 7G:2
Nemertea	Enopla	Monostilifera	Emplectonematidae	Emplectonema	Emplectonema gracile	NC_016952.1	14666	4A:51, 5A:24, 6A:5, 7A:2, 8A:3, 9A:1, 20A:1	4T:234, 5T:107, 6T:64, 7T:46, 8T:29, 9T:20, 10T:8, 11T:3, 12T:1, 16T:1, 30T:1	4C:6	4G:23, 5G:9
Mollusca	Gastropoda	Trochida	Tegulidae	Tegula	Tegula brunnea	NC_016954.1	17690	4A:129, 5A:39, 6A:17, 7A:9, 8A:2	4T:134, 5T:44, 6T:15, 7T:11, 8T:4	4C:23, 5C:3, 6C:1	4G:22, 5G:3, 6G:1
Arthropoda	Insecta	Embioptera	Oligotomidae	Aposthonia	Aposthonia japonica	AB639034.1	18305	4A:197, 5A:60, 6A:30, 7A:23, 8A:5, 9A:2, 10A:5, 11A:2	4T:93, 5T:45, 6T:12, 7T:5, 8T:1	4C:33, 5C:19, 6C:2, 7C:1	4G:3, 5G:1, 6G:1
Platyhelminthes	Monogenea	Mazocraeidea	Microcotylidae	Polylabroides	Polylabroides guangdongensis	JQ038230.1	12885	4A:58, 5A:16, 6A:7, 7A:6, 8A:2	4T:158, 5T:67, 6T:32, 7T:13, 8T:8, 9T:9, 10T:3, 11T:3, 22T:1	4C:1, 5C:1	4G:15
Platyhelminthes	Monogenea	Polystomatidea	Polystomatidae	Diplorchis	Diplorchis hangzhouensis	JQ038227.1	13918	4A:39, 5A:17, 6A:1	4T:234, 5T:88, 6T:59, 7T:24, 8T:19, 9T:7, 10T:8, 11T:5, 13T:3		4G:26, 5G:5, 6G:3, 7G:1
Platyhelminthes	Monogenea	Mazocraeidea	Mazocraeidae	Neomazocraes	Neomazocraes dorosomatis	JQ038229.1	12290	4A:64, 5A:37, 6A:5, 7A:6, 8A:4, 10A:1	4T:174, 5T:73, 6T:49, 7T:25, 8T:15, 9T:8, 10T:1	4C:4	4G:18, 5G:7, 6G:2, 7G:1
Platyhelminthes	Monogenea	Dactylogyridea	Diplectanidae	Pseudorhabdosynochus	Pseudorhabdosynochus yangjiangensis	JQ038231.1	12458	4A:69, 5A:35, 6A:13, 7A:8, 8A:5	4T:187, 5T:66, 6T:44, 7T:20, 8T:15, 9T:3, 10T:1, 11T:1	4C:2	4G:27, 5G:14, 6G:7
Chordata	Aves	Galliformes	Phasianidae	Argusianus	Argusianus argus	JQ713768.1	15204	4A:50, 5A:19, 6A:7, 7A:2	4T:19, 5T:7, 6T:2, 7T:2, 8T:1, 10T:2	4C:63, 5C:21, 6C:4, 7C:3, 10C:1	4G:11, 5G:2, 7G:1
Platyhelminthes	Cestoda	Diphyllobothriidea	Diphyllobothriidae	Diplogonoporus	Diplogonoporus grandis	AB425840.1	13725	4A:22, 5A:6, 6A:1, 7A:1	4T:188, 5T:54, 6T:45, 7T:17, 8T:13, 9T:2, 10T:1	4C:6, 5C:2	4G:32, 5G:7
Porifera	Demospongiae	Spongillida	Lubomirskiidae	Swartschewskia	Swartschewskia papyracea	JQ302308.1	26518	4A:77, 5A:17, 6A:5, 7A:3	4T:142, 5T:47, 6T:17, 7T:13, 8T:4	4C:49, 5C:11, 6C:3	4G:95, 5G:28, 6G:6, 7G:1
Arthropoda	Malacostraca	Decapoda	Sergestidae	Acetes	Acetes chinensis	NC_017600.1	15740	4A:120, 5A:40, 6A:14, 7A:12, 8A:6, 9A:2, 11A:1, 12A:1	4T:125, 5T:60, 6T:17, 7T:5, 8T:8, 9T:2, 10T:2	4C:25, 5C:5, 6C:1, 10C:1	4G:8, 5G:1, 6G:1
Mollusca	Bivalvia	Solemyida	Solemyidae	Solemya	Solemya velum	NC_017612.1	15660	4A:134, 5A:50, 6A:22, 7A:8, 8A:5	4T:114, 5T:34, 6T:7, 7T:7, 8T:3, 10T:1, 18T:1	4C:13, 5C:6, 6C:1, 7C:1	4G:19, 5G:3, 6G:1, 7G:2
Mollusca	Bivalvia	Adapedonta	Solenidae	Solen	Solen strictus	NC_017616.1	16535	4A:51, 5A:19, 6A:5, 7A:3, 8A:1	4T:176, 5T:94, 6T:39, 7T:20, 8T:13, 9T:3, 10T:1, 15T:1	4C:11, 5C:3, 6C:1, 8C:1	4G:64, 5G:21, 6G:8, 7G:2, 12G:1, 14G:1
Arthropoda	Insecta	Phasmatodea	Phasmatidae	Extatosoma	Extatosoma tiaratum	AB642680.1	16537	4A:198, 5A:74, 6A:48, 7A:16, 8A:8, 9A:2, 10A:1	4T:87, 5T:21, 6T:4, 9T:1	4C:9, 5C:2	4G:5, 5G:4
Mollusca	Cephalopoda	Myopsida	Loliginidae	Uroteuthis	Uroteuthis edulis	AB675081.1	17351	4A:117, 5A:61, 6A:27, 7A:12, 8A:4, 9A:3, 10A:1	4T:109, 5T:47, 6T:13, 7T:3, 8T:2	4C:29, 5C:17, 6C:3	4G:8, 5G:4, 7G:1
Mollusca	Cephalopoda	Sepiida	Sepiidae	Sepiella	Sepiella japonica	AB675082.1	16172	4A:135, 5A:61, 6A:22, 7A:13, 8A:3, 9A:3, 10A:1	4T:124, 5T:44, 6T:19, 7T:8, 8T:5, 10T:1	4C:24, 5C:6, 6C:1, 7C:2	4G:3, 5G:1
Arthropoda	Insecta	Lepidoptera	Sphingidae	Manduca	Manduca sexta	AIXA01038378.1	10639	4A:144, 5A:53, 6A:31, 7A:14, 8A:4, 10A:2, 16A:1	4T:82, 5T:30, 6T:16, 7T:8, 8T:3, 11T:1	4C:3, 5C:4	4G:10, 5G:4, 6G:1
Arthropoda	Insecta	Hemiptera	Ceratocombidae	Ceratocombus	Ceratocombus sp.	JQ739176.1	16646	4A:219, 5A:86, 6A:49, 7A:22, 8A:13, 9A:5, 10A:2	4T:99, 5T:22, 6T:9, 7T:6, 8T:2, 9T:1	4C:25, 5C:12, 6C:4, 7C:1, 8C:1	4G:12, 5G:4, 6G:1, 7G:1, 8G:1
Arthropoda	Insecta	Hemiptera	Schizopteridae	Hypselosoma	Hypselosoma matsumurae	JQ739177.1	15200	4A:160, 5A:85, 6A:40, 7A:27, 8A:13, 9A:2, 10A:1, 11A:1, 15A:1	4T:76, 5T:33, 6T:6, 7T:2, 8T:1, 13T:1	4C:17, 5C:7, 7C:1, 8C:1	4G:4, 5G:1, 6G:1, 8G:2, 9G:1
Arthropoda	Insecta	Hemiptera	Cimicidae	Cimex	Cimex lectularius	JQ739180.1	16996	4A:182, 5A:71, 6A:46, 7A:12, 8A:6	4T:93, 5T:32, 6T:10, 7T:3, 8T:1	4C:26, 5C:8, 6C:6, 8C:1	4G:10, 5G:1, 6G:3, 7G:1, 8G:1
Arthropoda	Insecta	Hemiptera	Peloridiidae	Peloridium	Peloridium hammoniorum	JQ739182.1	15303	4A:151, 5A:69, 6A:24, 7A:20, 8A:6, 9A:3, 10A:1	4T:128, 5T:51, 6T:11, 7T:6, 8T:5	4C:25, 5C:3, 7C:1	4G:5, 5G:1, 6G:2
Arthropoda	Insecta	Hemiptera	Tingidae	Ammianus	Ammianus toi	JQ739178.1	14230	4A:154, 5A:75, 6A:40, 7A:11, 8A:9, 9A:7	4T:75, 5T:29, 6T:8, 7T:2, 8T:3	4C:9, 5C:6	4G:7, 5G:3, 6G:1
Arthropoda	Insecta	Hemiptera	Peloridiidae	Peloridora	Peloridora minuta	JQ739183.1	14150	4A:113, 5A:67, 6A:29, 7A:15, 8A:3, 9A:2, 10A:1	4T:51, 5T:14, 6T:8, 7T:2, 8T:1	4C:42, 5C:18, 6C:2, 7C:4	4G:12, 5G:4, 6G:1, 7G:1
Arthropoda	Arachnida	Ixodida	Ixodidae	Archaeocroton	Archaeocroton sphenodonti	NC_017745.1	14772	4A:147, 5A:71, 6A:33, 7A:21, 8A:7, 9A:6, 10A:4, 11A:1, 12A:1	4T:161, 5T:75, 6T:37, 7T:19, 8T:11, 9T:6, 10T:2, 11T:1	4C:10, 5C:6, 6C:1	4G:8, 5G:3
Arthropoda	Arachnida	Ixodida	Ixodidae	Bothriocroton	Bothriocroton undatum	NC_017757.1	14769	4A:135, 5A:80, 6A:34, 7A:10, 8A:7, 9A:3, 10A:1, 11A:2, 19A:1, 20A:1	4T:183, 5T:85, 6T:28, 7T:20, 8T:12, 9T:3, 10T:1, 12T:1	4C:13, 5C:3, 6C:3, 7C:1	4G:11, 5G:5, 6G:1, 7G:1, 8G:1
Arthropoda	Arachnida	Ixodida	Ixodidae	Robertsicus	Robertsicus elaphensis	NC_017758.1	14627	4A:140, 5A:68, 6A:31, 7A:22, 8A:4, 9A:3, 10A:5, 12A:2	4T:194, 5T:71, 6T:33, 7T:8, 8T:8, 9T:9, 11T:2, 12T:4	4C:9, 5C:1, 6C:1	4G:2, 5G:1
Arthropoda	Insecta	Hemiptera	Acanthosomatidae	Sastragala	Sastragala edessoides	JQ743676.1	16358	4A:189, 5A:61, 6A:29, 7A:11, 8A:1, 9A:3	4T:112, 5T:23, 6T:7, 8T:2	4C:24, 5C:10, 6C:3, 7C:1	4G:7, 5G:3, 6G:1
Arthropoda	Insecta	Hemiptera	Velocipedidae	Scotomedes	Scotomedes sp.	JQ743677.1	15570	4A:165, 5A:59, 6A:22, 7A:12, 8A:4	4T:69, 5T:12, 6T:4, 7T:4	4C:28, 5C:6	4G:2, 5G:1, 7G:1
Arthropoda	Insecta	Hemiptera	Scutelleridae	Eucorysses	Eucorysses grandis	JQ743671.1	14611	4A:150, 5A:74, 6A:24, 7A:10, 8A:3	4T:74, 5T:28, 6T:7, 7T:3, 8T:1	4C:21, 5C:5, 6C:2	4G:4, 5G:1, 7G:1
Chordata	Amphibia	Caudata	Salamandridae	Echinotriton	Echinotriton andersoni	AB689008.1	16268	4A:92, 5A:38, 6A:11, 7A:8, 8A:1	4T:66, 5T:20, 6T:7, 7T:4, 8T:1	4C:51, 5C:16, 6C:4, 7C:2	4G:11, 5G:3
Chordata	Amphibia	Caudata	Salamandridae	Tylototriton	Tylototriton verrucosus	AB689009.1	17100	4A:104, 5A:41, 6A:15, 7A:6	4T:52, 5T:13, 6T:10, 7T:4, 8T:1	4C:61, 5C:21, 6C:5, 7C:1, 9C:1	4G:15, 5G:9, 9G:1
Chordata	Actinopteri	Mugiliformes	Mugilidae	Agonostomus	Agonostomus monticola	NC_017876.1	16734	4A:66, 5A:26, 6A:5, 7A:2	4T:60, 5T:18, 6T:10, 7T:1, 8T:1	4C:91, 5C:36, 6C:11, 7C:2	4G:19, 5G:8, 6G:2
Nemertea	Pilidiophora	Heteronemertea	Lineidae	Zygeupolia	Zygeupolia rubens	NC_017877.1	15513	4A:46, 5A:30, 6A:12, 7A:2, 8A:1	4T:249, 5T:105, 6T:53, 7T:34, 8T:20, 9T:4, 10T:5	4C:3, 11C:1	4G:59, 5G:18, 6G:5, 7G:3, 8G:2, 11G:1, 12G:1
Chordata	Actinopteri	Mugiliformes	Mugilidae	Aldrichetta	Aldrichetta forsteri	NC_017879.1	16797	4A:71, 5A:27, 6A:3, 7A:2	4T:54, 5T:14, 6T:4, 10T:1	4C:88, 5C:39, 6C:10, 7C:2, 8C:1, 10C:1	4G:21, 5G:9, 6G:1
Chordata	Actinopteri	Mugiliformes	Mugilidae	Chaenomugil	Chaenomugil proboscideus	NC_017881.1	16666	4A:66, 5A:30, 6A:5, 7A:2	4T:64, 5T:30, 6T:3, 7T:3	4C:74, 5C:35, 6C:7, 7C:3	4G:19, 5G:3, 6G:1
Chordata	Actinopteri	Gobiiformes	Gobiidae	Stiphodon	Stiphodon alcedo	AB613000.1	16505	4A:80, 5A:29, 6A:8, 7A:1	4T:43, 5T:23, 6T:2, 8T:1	4C:71, 5C:34, 6C:13, 7C:1, 9C:1	4G:14, 5G:8, 6G:1
Arthropoda	Insecta	Orthoptera	Chorotypidae	Erianthus	Erianthus versicolor	JQ975394.1	15397	4A:136, 5A:68, 6A:21, 7A:15, 8A:6, 9A:5, 10A:3, 11A:1	4T:81, 5T:26, 6T:11, 7T:3, 8T:1	4C:10, 5C:5, 6C:1	4G:3, 5G:2, 6G:1
Platyhelminthes	Monogenea	Dactylogyridea	Ancyrocephalidae	Tetrancistrum	Tetrancistrum nebulosi	NC_018031.1	13392	4A:46, 5A:18, 6A:2, 7A:1	4T:129, 5T:62, 6T:17, 7T:7, 8T:3, 9T:1	4C:11, 5C:4, 6C:2	4G:55, 5G:21, 6G:6
Chordata	Aves	Galliformes	Phasianidae	Ithaginis	Ithaginis cruentus	NC_018033.1	16683	4A:78, 5A:32, 6A:7, 7A:5	4T:34, 5T:7, 6T:3, 7T:2, 10T:1	4C:77, 5C:31, 6C:7, 7C:4	4G:14, 5G:2, 7G:1
Chordata	Aves	Galliformes	Phasianidae	Tetraophasis	Tetraophasis obscurus	NC_018034.1	16707	4A:76, 5A:30, 6A:6, 7A:4	4T:34, 5T:8, 6T:7, 7T:2, 9T:1	4C:79, 5C:29, 6C:10, 7C:4, 8C:1	4G:12, 5G:4, 7G:2
Chordata	Actinopteri	Cypriniformes	Gobionidae	Gobiocypris	Gobiocypris rarus	NC_018099.1	16601	4A:70, 5A:22, 6A:5, 7A:3	4T:77, 5T:15, 6T:10, 7T:2	4C:58, 5C:26, 6C:7, 7C:1	4G:29, 5G:10, 6G:2
Arthropoda	Insecta	Hymenoptera	Ichneumonidae	Diadromus	Diadromus collaris	JX131613.1	14621	4A:129, 5A:72, 6A:24, 7A:7, 8A:4, 9A:1, 10A:2, 11A:2	4T:174, 5T:50, 6T:23, 7T:12, 8T:11, 9T:4, 10T:1, 11T:1, 12T:1, 13T:1	4C:12, 5C:10, 7C:1	4G:6, 5G:2
Arthropoda	Insecta	Diptera	Tachinidae	Elodia	Elodia flavipalpis	NC_018118.1	14932	4A:136, 5A:68, 6A:36, 7A:10, 8A:9, 10A:1, 22A:1	4T:164, 5T:70, 6T:25, 7T:13, 8T:7, 9T:3, 10T:3	4C:5, 5C:4	4G:1
Arthropoda	Insecta	Blattodea	Mastotermitidae	Mastotermes	Mastotermes darwiniensis	NC_018120.1	15487	4A:131, 5A:66, 6A:17, 7A:8, 8A:3, 9A:1, 10A:1	4T:55, 5T:14, 6T:6, 7T:1, 10T:1	4C:23, 5C:10, 6C:1	4G:12, 5G:4
Arthropoda	Insecta	Blattodea	Termopsidae	Porotermes	Porotermes adamsoni	NC_018121.1	16039	4A:170, 5A:86, 6A:24, 7A:12, 8A:8, 9A:3, 10A:1	4T:22, 5T:7, 6T:2	4C:26, 5C:13, 6C:1	4G:11, 5G:6
Arthropoda	Insecta	Blattodea	Hodotermitidae	Microhodotermes	Microhodotermes viator	NC_018122.1	15704	4A:177, 5A:82, 6A:55, 7A:15, 8A:7, 9A:7, 10A:1	4T:24, 5T:5, 6T:1, 9T:1	4C:24, 5C:17, 6C:3	4G:6, 5G:3
Arthropoda	Insecta	Blattodea	Termopsidae	Zootermopsis	Zootermopsis angusticollis	NC_018123.1	15483	4A:174, 5A:93, 6A:43, 7A:28, 8A:21, 9A:7, 10A:5, 14A:1, 15A:1	4T:30, 5T:8, 6T:4, 7T:2, 8T:1, 9T:1	4C:24, 5C:9, 6C:2	4G:9, 5G:5, 6G:1
Arthropoda	Insecta	Blattodea	Rhinotermitidae	Schedorhinotermes	Schedorhinotermes breinli	NC_018126.1	15864	4A:183, 5A:73, 6A:39, 7A:22, 8A:6, 9A:3, 13A:1	4T:24, 5T:6, 6T:1	4C:22, 5C:9, 6C:7	4G:5, 5G:3, 6G:1
Arthropoda	Insecta	Blattodea	Rhinotermitidae	Heterotermes	Heterotermes sp.	NC_018127.1	16370	4A:176, 5A:80, 6A:27, 7A:11, 8A:4, 9A:1	4T:18, 5T:9, 6T:1, 7T:3	4C:26, 5C:10, 6C:4	4G:8, 5G:4, 6G:2
Arthropoda	Insecta	Blattodea	Termitidae	Macrognathotermes	Macrognathotermes errator	NC_018130.1	16330	4A:164, 5A:79, 6A:16, 7A:11, 8A:7	4T:28, 5T:12	4C:18, 5C:10, 6C:3	4G:13, 5G:2, 6G:1, 7G:1
Chordata	Lepidosauria	Squamata	Eublepharidae	Hemitheconyx	Hemitheconyx taylori	AB610503.1	16363	4A:77, 5A:24, 6A:11, 7A:4, 8A:1, 10A:1	4T:42, 5T:12, 6T:7, 7T:7, 8T:8, 9T:1	4C:100, 5C:42, 6C:14, 7C:2, 8C:4, 10C:2	4G:25, 5G:11, 6G:6
Arthropoda	Insecta	Coleoptera	Scraptiidae	Anaspis	Anaspis sp.	HQ232806.2	10622	4A:101, 5A:56, 6A:23, 7A:9, 8A:5, 9A:1	4T:60, 5T:33, 6T:10, 7T:3, 9T:2	4C:11, 5C:6, 6C:1
Arthropoda	Insecta	Coleoptera	Dermestidae	Anthrenus	Anthrenus sp.	HQ232808.2	12847	4A:132, 5A:57, 6A:40, 7A:13, 8A:7, 9A:2, 10A:2, 12A:1	4T:61, 5T:24, 6T:5, 7T:1, 8T:2	4C:15, 5C:7, 6C:1	4G:9, 5G:1, 6G:1
Arthropoda	Insecta	Coleoptera	Ptinidae	Ptinus	Ptinus rufipes	HQ232819.2	10458	4A:111, 5A:52, 6A:24, 7A:16, 8A:7, 9A:2, 11A:1	4T:48, 5T:16, 6T:7, 7T:4, 8T:1	4C:13, 5C:5, 6C:1	4G:17, 5G:4
Arthropoda	Insecta	Coleoptera	Carabidae	Calosoma	Calosoma sp.	NC_018339.1	16462	4A:153, 5A:71, 6A:25, 7A:15, 8A:7, 9A:3, 10A:3, 11A:2, 12A:1, 13A:1	4T:137, 5T:51, 6T:24, 7T:7, 8T:5, 9T:4, 20T:1	4C:22, 5C:6, 6C:2	4G:3, 5G:2
Porifera	Demospongiae	Spongillida	Lubomirskiidae	Baikalospongia	Baikalospongia intermedia	NC_018343.1	28227	4A:89, 5A:17, 6A:4, 7A:4	4T:148, 5T:49, 6T:19, 7T:12, 8T:6	4C:56, 5C:12, 6C:2	4G:98, 5G:31, 6G:5, 8G:1
Bryozoa	Gymnolaemata	Cheilostomatida	Hippothoidae	Celleporella	Celleporella hyalina	NC_018344.1	17265	4A:109, 5A:54, 6A:22, 7A:12, 8A:8, 9A:4, 10A:6, 11A:1, 12A:2	4T:134, 5T:50, 6T:32, 7T:16, 8T:11, 9T:4, 10T:4, 11T:4, 12T:1	4C:10, 5C:2, 6C:1	4G:8, 5G:7, 6G:2, 8G:1, 9G:1
Arthropoda	Insecta	Coleoptera	Cucujidae	Cucujus	Cucujus clavipes	NC_018350.1	15642	4A:153, 5A:74, 6A:29, 7A:11, 8A:2, 9A:2, 10A:1, 11A:1	4T:144, 5T:54, 6T:16, 7T:8, 8T:7, 9T:1, 10T:1, 11T:2	4C:22, 5C:19, 6C:2, 7C:3	4G:5, 5G:4, 6G:1, 7G:1
Arthropoda	Insecta	Coleoptera	Silphidae	Necrophila	Necrophila americana	NC_018352.1	16902	4A:155, 5A:66, 6A:30, 7A:15, 8A:8, 9A:4, 10A:1	4T:138, 5T:61, 6T:19, 7T:12, 8T:6, 9T:4, 10T:2, 11T:1, 14T:1	4C:30, 5C:12, 6C:4, 7C:2, 9C:1	4G:5, 5G:1, 6G:1
Arthropoda	Insecta	Coleoptera	Histeridae	Euspilotus	Euspilotus scissus	NC_018353.1	14763	4A:126, 5A:58, 6A:19, 7A:11, 8A:4, 9A:2	4T:128, 5T:59, 6T:22, 7T:6, 8T:3, 9T:1	4C:20, 5C:6, 9C:1	4G:2, 5G:2, 6G:1
Arthropoda	Insecta	Coleoptera	Curculionidae	Naupactus	Naupactus xanthographus	NC_018354.1	15026	4A:151, 5A:81, 6A:29, 7A:19, 8A:7, 9A:5, 10A:1	4T:166, 5T:72, 6T:26, 7T:7, 8T:2, 9T:1, 10T:1	4C:12, 5C:7, 6C:1, 7C:1	4G:6, 5G:1
Chordata	Mammalia	Artiodactyla	Cervidae	Elaphurus	Elaphurus davidianus	NC_018358.1	16355	4A:77, 5A:39, 6A:7, 7A:5, 8A:1	4T:65, 5T:20, 6T:5	4C:49, 5C:14, 6C:3, 8C:1	4G:7, 5G:3, 6G:1
Porifera	Demospongiae	Spongillida	Lubomirskiidae	Rezinkovia	Rezinkovia echinata	NC_018360.1	28614	4A:91, 5A:15, 6A:4, 7A:4	4T:147, 5T:49, 6T:19, 7T:12, 8T:5	4C:48, 5C:17, 6C:3	4G:98, 5G:30, 6G:6, 8G:1
Cnidaria	Anthozoa	Scleractinia	Oculinidae	Madrepora	Madrepora oculata	NC_018364.1	15841	4A:88, 5A:36, 6A:16, 7A:10, 8A:5, 9A:1, 10A:2	4T:258, 5T:104, 6T:65, 7T:30, 8T:24, 9T:11, 10T:7, 11T:1, 12T:3, 13T:3, 15T:1	4C:6	4G:56, 5G:19, 6G:3, 8G:1, 9G:1
Mollusca	Bivalvia	Cardiida	Psammobiidae	Nuttallia	Nuttallia olivacea	NC_018373.1	18182	4A:48, 5A:24, 6A:7, 7A:2, 8A:2	4T:174, 5T:76, 6T:24, 7T:7, 8T:2, 15T:1	4C:13, 5C:2, 6C:2, 7C:1	4G:63, 5G:16, 6G:8, 7G:2, 8G:1
Mollusca	Bivalvia	Cardiida	Semelidae	Semele	Semele scabra	NC_018374.1	17117	4A:39, 5A:8, 6A:6, 8A:2	4T:146, 5T:59, 6T:23, 7T:8, 8T:5, 9T:2, 11T:1, 15T:1	4C:13, 5C:3	4G:90, 5G:42, 6G:16, 7G:7, 8G:3, 9G:3, 10G:1, 11G:3
Mollusca	Bivalvia	Cardiida	Solecurtidae	Solecurtus	Solecurtus divaricatus	NC_018376.1	16749	4A:18, 5A:9, 6A:1, 7A:2	4T:172, 5T:70, 6T:34, 7T:7, 8T:2, 9T:2, 10T:1, 18T:1	4C:9, 5C:2, 6C:1	4G:78, 5G:34, 6G:13, 7G:2, 8G:1, 9G:2
Chordata	Actinopteri	Cichliformes	Cichlidae	Taeniolethrinops	Taeniolethrinops praeorbitalis	JN628857.1	16580	4A:74, 5A:25, 6A:4, 7A:1	4T:42, 5T:15, 6T:4, 7T:2, 10T:1	4C:94, 5C:51, 6C:13, 7C:3, 8C:1	4G:18, 5G:13, 6G:2
Chordata	Actinopteri	Cichliformes	Cichlidae	Pallidochromis	Pallidochromis tokolosh	JN628859.1	16581	4A:73, 5A:24, 6A:6, 7A:1	4T:45, 5T:15, 6T:4, 7T:2, 12T:1	4C:91, 5C:53, 6C:11, 7C:3	4G:20, 5G:12, 6G:3
Chordata	Actinopteri	Syngnathiformes	Callionymidae	Repomucenus	Repomucenus curvicornis	AP012307.1	16406	4A:70, 5A:20, 6A:6, 7A:1	4T:58, 5T:28, 6T:5, 7T:4, 8T:1	4C:72, 5C:39, 6C:16, 7C:5, 8C:1	4G:28, 5G:16, 6G:1, 7G:1
Chordata	Mammalia	Primates	Atelidae	Brachyteles	Brachyteles arachnoides	JX262672.1	16491	4A:88, 5A:29, 6A:9, 7A:4	4T:33, 5T:13, 6T:4, 7T:1	4C:48, 5C:20, 6C:6	4G:11, 5G:1
Arthropoda	Insecta	Dermaptera	Pygidicranidae	Challia	Challia fletcheri	NC_018538.1	20456	4A:60, 5A:44, 6A:7, 7A:2, 10A:1	4T:184, 5T:62, 6T:27, 7T:11, 8T:8, 9T:5, 10T:3	4C:4, 5C:1, 6C:3	4G:64, 5G:14, 6G:4, 7G:1, 8G:2, 9G:1
Chordata	Mammalia	Chiroptera	Hipposideridae	Hipposideros	Hipposideros armiger	NC_018540.1	16784	4A:69, 5A:34, 6A:8, 7A:2, 8A:1	4T:38, 5T:4, 6T:3, 7T:2	4C:66, 5C:24, 6C:8, 7C:1	4G:17, 5G:4
Arthropoda	Insecta	Orthoptera	Tetrigidae	Alulatettix	Alulatettix yunnanensis	NC_018542.1	15104	4A:165, 5A:62, 6A:48, 7A:16, 8A:17, 9A:8, 10A:4, 11A:1	4T:61, 5T:23, 6T:7, 7T:3	4C:18, 5C:7, 7C:1	4G:2, 5G:3, 7G:1
Arthropoda	Insecta	Blattodea	Blattellidae	Blattella	Blattella bisignata	NC_018549.1	16470	4A:134, 5A:55, 6A:24, 7A:16, 8A:7, 9A:2	4T:109, 5T:45, 6T:19, 7T:6, 8T:4, 9T:3	4C:25, 5C:9, 6C:1, 7C:1	4G:7, 5G:1
Chordata	Actinopteri	Cichliformes	Cichlidae	Trematocranus	Trematocranus placodon	NC_018555.1	16579	4A:71, 5A:25, 6A:5, 7A:1	4T:43, 5T:13, 6T:4, 7T:2, 11T:1	4C:94, 5C:50, 6C:13, 7C:3	4G:19, 5G:10, 6G:3
Chordata	Actinopteri	Cichliformes	Cichlidae	Petrotilapia	Petrotilapia nigra	NC_018557.1	16583	4A:69, 5A:28, 6A:5, 7A:1	4T:47, 5T:17, 6T:4, 7T:2, 11T:1	4C:90, 5C:53, 6C:13, 7C:2, 8C:1	4G:20, 5G:8, 6G:3
Chordata	Actinopteri	Cichliformes	Cichlidae	Nimbochromis	Nimbochromis linni	NC_018558.1	16584	4A:72, 5A:25, 6A:5, 7A:1	4T:44, 5T:14, 6T:4, 7T:2, 9T:1	4C:93, 5C:51, 6C:13, 7C:1, 8C:2	4G:18, 5G:11, 6G:3, 7G:1
Chordata	Actinopteri	Cichliformes	Cichlidae	Pseudotropheus	Pseudotropheus crabro	NC_018559.1	16584	4A:70, 5A:28, 6A:5, 7A:1	4T:47, 5T:17, 6T:4, 7T:2, 11T:1	4C:92, 5C:52, 6C:13, 7C:1, 8C:2	4G:22, 5G:9, 6G:3
Chordata	Actinopteri	Cichliformes	Cichlidae	Dimidiochromis	Dimidiochromis compressiceps	NC_018561.1	16583	4A:70, 5A:25, 6A:5, 7A:1	4T:44, 5T:14, 6T:4, 7T:2, 11T:1	4C:94, 5C:49, 6C:13, 7C:3	4G:19, 5G:10, 6G:3
Chordata	Actinopteri	Cichliformes	Cichlidae	Genyochromis	Genyochromis mento	NC_018562.1	16583	4A:71, 5A:29, 6A:5, 7A:1	4T:48, 5T:17, 6T:4, 7T:2, 11T:1	4C:89, 5C:52, 6C:13, 7C:3	4G:21, 5G:8, 6G:3
Chordata	Actinopteri	Cichliformes	Cichlidae	Cynotilapia	Cynotilapia afra	NC_018564.1	16585	4A:70, 5A:28, 6A:5, 7A:1	4T:46, 5T:18, 6T:4, 7T:2, 10T:1	4C:90, 5C:52, 6C:13, 7C:1, 8C:2	4G:22, 5G:9, 6G:2, 7G:1
Chordata	Actinopteri	Clupeiformes	Clupeidae	Clupanodon	Clupanodon thrissa	NC_018600.1	16692	4A:49, 5A:11, 6A:2	4T:36, 5T:8, 6T:3, 7T:2	4C:70, 5C:37, 6C:9	4G:41, 5G:14, 6G:3
Chordata	Actinopteri	Cypriniformes	Cyprinidae	Percocypris	Percocypris pingi	NC_018601.1	16586	4A:82, 5A:22, 6A:4, 7A:1	4T:48, 5T:12, 6T:2, 7T:2	4C:59, 5C:26, 6C:4, 8C:1	4G:24, 5G:8, 6G:2
Arthropoda	Malacostraca	Isopoda	Armadillidiidae	Armadillidium	Armadillidium vulgare	EF643519.3	13939	4A:88, 5A:36, 6A:14, 7A:4, 10A:1	4T:135, 5T:56, 6T:20, 7T:8, 8T:5, 9T:5	4C:7, 5C:7	4G:37, 5G:6, 6G:1
Rotifera	Eurotatoria	Philodinida	Philodinidae	Philodina	Philodina citrina	FR856884.1	14003	4A:77, 5A:24, 6A:9, 7A:5, 8A:3, 9A:1, 12A:1	4T:207, 5T:98, 6T:53, 7T:26, 8T:13, 9T:2, 10T:5, 11T:2, 13T:2	4C:1, 5C:1	4G:12, 5G:6, 6G:3, 7G:1
Chordata	Actinopteri	Cichliformes	Cichlidae	Petrochromis	Petrochromis trewavasae	HE961974.1	16588	4A:70, 5A:27, 6A:6, 7A:1	4T:47, 5T:16, 6T:4, 7T:3, 11T:1	4C:84, 5C:55, 6C:14, 7C:1, 9C:1	4G:21, 5G:8, 6G:1
Chordata	Actinopteri	Cichliformes	Cichlidae	Tropheus	Tropheus moorii	HE961975.1	16590	4A:68, 5A:28, 6A:6, 7A:1	4T:54, 5T:14, 6T:3, 7T:2, 12T:1	4C:84, 5C:54, 6C:13, 7C:1, 8C:2	4G:20, 5G:7
Chordata	Actinopteri	Cypriniformes	Leuciscidae	Oreoleuciscus	Oreoleuciscus potanini	AB626851.1	16602	4A:54, 5A:14, 6A:5, 7A:1	4T:58, 5T:13, 6T:4, 7T:1	4C:61, 5C:35, 6C:12, 7C:1	4G:25, 5G:12, 7G:1
Chordata	Actinopteri	Perciformes	Cottidae	Trachidermus	Trachidermus fasciatus	NC_018770.1	16536	4A:61, 5A:17, 6A:1	4T:39, 5T:8, 6T:2, 7T:1, 10T:1	4C:70, 5C:49, 6C:10, 7C:1, 20C:1	4G:29, 5G:12, 6G:1
Cnidaria	Anthozoa	Scleralcyonacea	Coralliidae	Paraminabea	Paraminabea aldersladei	NC_018790.1	19886	4A:74, 5A:20, 6A:4	4T:79, 5T:23, 6T:9, 8T:1	4C:43, 5C:14, 6C:1	4G:52, 5G:20, 6G:5, 7G:2
Arthropoda	Insecta	Hymenoptera	Tenthredinidae	Monocellicampa	Monocellicampa pruni	JX566509.1	15169	4A:149, 5A:82, 6A:25, 7A:12, 8A:7, 9A:5, 10A:2, 11A:1	4T:124, 5T:52, 6T:20, 7T:5, 8T:4, 9T:2	4C:32, 5C:7, 6C:5, 7C:1, 8C:1	4G:10, 5G:3, 6G:1, 7G:1
Arthropoda	Malacostraca	Amphipoda	Hadziidae	Bahadzia	Bahadzia jaraguensis	FR872382.1	14657	4A:102, 5A:46, 6A:23, 7A:11, 8A:2, 9A:1, 13A:1	4T:93, 5T:42, 6T:7, 7T:4, 8T:3, 10T:1, 21T:1	4C:17, 5C:4, 6C:1	4G:3
Arthropoda	Insecta	Hemiptera	Tessaratomidae	Dalcantha	Dalcantha dilatata	JQ910981.1	15350	4A:150, 5A:51, 6A:35, 7A:10, 8A:3, 9A:1	4T:54, 5T:22, 6T:5, 7T:2, 8T:1, 9T:1	4C:15, 5C:7, 6C:1, 7C:1	4G:2, 5G:2, 6G:1
Arthropoda	Insecta	Hemiptera	Cicadidae	Oncotympana	Oncotympana maculaticollis	JQ910987.1	14429	4A:108, 5A:53, 6A:15, 7A:6, 8A:4, 9A:1, 11A:1	4T:117, 5T:45, 6T:23, 7T:12, 8T:3, 11T:1	4C:8, 5C:5	4G:1, 5G:2
Arthropoda	Insecta	Hemiptera	Stenocephalidae	Dicranocephalus	Dicranocephalus femoralis	JQ910990.1	14301	4A:142, 5A:67, 6A:26, 7A:13, 8A:5, 9A:1, 10A:1	4T:83, 5T:26, 6T:9, 7T:1, 8T:1	4C:10, 5C:4, 6C:2	4G:3
Arthropoda	Malacostraca	Decapoda	Strahlaxiidae	Neaxius	Neaxius glyptocercus	NC_019609.1	14909	4A:97, 5A:37, 6A:15, 7A:10, 8A:4	4T:124, 5T:44, 6T:19, 7T:6, 8T:4, 9T:1	4C:11, 5C:5, 6C:1	4G:14, 5G:2, 6G:1
Arthropoda	Insecta	Neuroptera	Chrysopidae	Chrysopa	Chrysopa pallens	NC_019618.1	16723	4A:136, 5A:55, 6A:25, 7A:13, 8A:1, 9A:4, 10A:1, 12A:1	4T:158, 5T:74, 6T:32, 7T:8, 8T:2, 9T:3	4C:16, 6C:1	4G:2
Arthropoda	Merostomata	Xiphosura	Limulidae	Carcinoscorpius	Carcinoscorpius rotundicauda	NC_019623.1	15033	4A:140, 5A:63, 6A:29, 7A:17, 8A:11, 9A:2, 10A:1	4T:138, 5T:47, 6T:17, 7T:6, 8T:4, 9T:1, 10T:1	4C:25, 5C:7, 6C:1	4G:3
Chordata	Mammalia	Eulipotyphla	Erinaceidae	Neotetracus	Neotetracus sinensis	NC_019626.1	16982	4A:78, 5A:40, 6A:13, 7A:2, 9A:2, 10A:1	4T:93, 5T:29, 6T:14, 7T:1	4C:40, 5C:11, 6C:4	4G:10, 5G:2
Arthropoda	Insecta	Diptera	Calliphoridae	Hemipyrellia	Hemipyrellia ligurriens	NC_019638.1	15938	4A:123, 5A:62, 6A:25, 7A:13, 8A:11, 9A:1, 10A:2, 11A:2, 19A:1	4T:144, 5T:57, 6T:21, 7T:4, 8T:5, 9T:1, 22T:1	4C:8, 5C:2, 6C:1	5G:1
Arthropoda	Insecta	Diptera	Tachinidae	Rutilia	Rutilia goerlingiana	NC_019640.1	15331	4A:145, 5A:70, 6A:35, 7A:9, 8A:3, 9A:1, 10A:2, 11A:2, 13A:1	4T:138, 5T:55, 6T:20, 7T:8, 8T:3, 9T:1	4C:12, 5C:4	4G:2
Arthropoda	Arachnida	Ixodida	Nuttalliellidae	Nuttalliella	Nuttalliella namaqua	NC_019663.1	14425	4A:135, 5A:82, 6A:29, 7A:14, 8A:8, 9A:1, 10A:2, 11A:1	4T:146, 5T:55, 6T:29, 7T:10, 8T:5, 10T:1	4C:14, 5C:4, 6C:1, 9C:1	4G:3, 5G:1
Chordata	Aves	Passeriformes	Meliphagidae	Epthianura	Epthianura albifrons	NC_019664.1	16868	4A:85, 5A:34, 6A:10, 7A:2, 8A:1	4T:26, 5T:6, 6T:3, 7T:1	4C:71, 5C:41, 6C:11, 7C:4, 8C:3, 9C:1, 13C:1	4G:10, 5G:1
Chordata	Aves	Passeriformes	Petroicidae	Petroica	Petroica phoenicea	NC_019668.1	16873	4A:69, 5A:28, 6A:6, 7A:1	4T:36, 5T:8, 6T:1	4C:73, 5C:33, 6C:13, 7C:3, 8C:2	4G:9, 5G:4
Nematoda	Chromadorea	Rhabditida	Metastrongylidae	Aelurostrongylus	Aelurostrongylus abstrusus	NC_019571.1	13913	4A:24, 5A:9, 6A:4, 7A:1, 8A:1, 11A:1	4T:216, 5T:148, 6T:56, 7T:54, 8T:23, 9T:23, 10T:5, 11T:2, 12T:2, 13T:2	5C:1	4G:30, 5G:11, 6G:6
Arthropoda	Insecta	Lepidoptera	Nymphalidae	Heliconius	Heliconius melpomene	HE579083.1	15328	4A:124, 5A:64, 6A:17, 7A:15, 8A:6, 9A:2, 10A:3, 11A:1	4T:169, 5T:81, 6T:47, 7T:15, 8T:6, 9T:3, 10T:4, 16T:1	4C:17, 5C:8, 6C:1	4G:1, 5G:1
Nematoda	Chromadorea	Rhabditida	Ancylostomatidae	Bunostomum	Bunostomum trigonocephalum	NC_019803.1	13764	4A:68, 5A:20, 6A:10, 7A:5, 8A:1	4T:263, 5T:129, 6T:69, 7T:36, 8T:16, 9T:11, 11T:1	4C:2, 5C:1	4G:14, 5G:7, 6G:1
Chordata	Aves	Psittaciformes	Psittacidae	Neophema	Neophema chrysogaster	NC_019804.1	18043	4A:72, 5A:29, 6A:7, 7A:3	4T:14, 5T:4, 7T:1	4C:96, 5C:56, 6C:17, 7C:5, 8C:2	4G:20, 5G:1, 6G:1
Acanthocephala	Palaeacanthocephala	Echinorhynchida	Echinorhynchidae	Echinorhynchus	Echinorhynchus truttae	NC_019805.1	13659	4A:182, 5A:69, 6A:25, 7A:4, 8A:1	4T:26, 5T:14, 6T:4, 7T:2, 8T:2	4C:76, 5C:31, 6C:7, 7C:1, 11C:1	4G:8, 6G:1
Acanthocephala	Eoacanthocephala	Neoechinorhynchida	Tenuisentidae	Paratenuisentis	Paratenuisentis ambiguus	NC_019807.1	13574	4A:55, 5A:11, 6A:2, 7A:2, 8A:2, 9A:1	4T:193, 5T:75, 6T:37, 7T:13, 8T:2, 9T:2	4C:6, 5C:2, 6C:1	4G:64, 5G:14, 6G:2, 7G:1
Acanthocephala	Archiacanthocephala	Oligacanthorhynchida	Oligacanthorhynchidae	Macracanthorhynchus	Macracanthorhynchus hirudinaceus	NC_019808.1	14282	4A:25, 5A:10, 6A:6, 7A:2	4T:145, 5T:53, 6T:22, 7T:4, 8T:1, 9T:1, 17T:1	4C:5	4G:61, 5G:18, 6G:4, 7G:4
Arthropoda	Insecta	Orthoptera	Acrididae	Chondracris	Chondracris rosea	NC_019993.1	15646	4A:152, 5A:65, 6A:28, 7A:16, 8A:9, 9A:2, 11A:2	4T:79, 5T:27, 6T:8, 7T:2, 8T:1	4C:10, 5C:4, 6C:2	4G:7, 5G:2
Chordata	Amphibia	Anura	Heleophrynidae	Heleophryne	Heleophryne regis	NC_019998.1	17620	4A:72, 5A:29, 6A:8, 7A:3	4T:80, 5T:25, 6T:10, 7T:5, 9T:1	4C:99, 5C:30, 6C:10, 7C:4, 8C:6, 9C:2, 10C:1, 12C:1, 13C:1	4G:18, 5G:12, 6G:2, 7G:1
Chordata	Amphibia	Anura	Sooglossidae	Sooglossus	Sooglossus thomasseti	NC_020001.1	16407	4A:71, 5A:31, 6A:5, 7A:1, 8A:2	4T:48, 5T:15, 6T:8	4C:83, 5C:24, 6C:10, 7C:1, 9C:2, 10C:1	4G:12, 5G:5, 6G:1
Mollusca	Bivalvia	Pterioida	Pinnidae	Atrina	Atrina pectinata	NC_020028.1	16811	4A:53, 5A:26, 6A:6, 8A:2	4T:159, 5T:50, 6T:38, 7T:14, 8T:6, 9T:2	4C:9, 5C:4	4G:59, 5G:22, 6G:9
Priapulida	Priapulimorpha	Priapulimorphida	Priapulidae	Halicryptus	Halicryptus spinulosus	NC_020030.1	14732	4A:77, 5A:21, 6A:8, 7A:2, 8A:4	4T:195, 5T:87, 6T:46, 7T:23, 8T:5, 9T:3, 10T:1	4C:10, 5C:3, 7C:3	4G:39, 5G:18, 6G:4
Chordata	Lepidosauria	Squamata	Phyllodactylidae	Phyllodactylus	Phyllodactylus unctus	NC_020038.1	16881	4A:60, 5A:17, 6A:3, 7A:3, 8A:1	4T:36, 5T:15, 6T:3, 8T:1	4C:102, 5C:50, 6C:19, 7C:6, 9C:1, 11C:1	4G:31, 5G:7, 6G:4, 7G:2
Chordata	Lepidosauria	Squamata	Gekkonidae	Cnemaspis	Cnemaspis limi	NC_020039.1	16680	4A:64, 5A:30, 6A:5, 7A:2, 8A:1, 9A:1	4T:47, 5T:18, 6T:3, 7T:2, 8T:1	4C:84, 5C:28, 6C:7, 7C:4, 8C:2, 13C:1	4G:12, 5G:6, 9G:1
Chordata	Actinopteri	Cypriniformes	Gobionidae	Coreius	Coreius heterodon	NC_020042.1	16611	4A:96, 5A:29, 6A:6, 7A:3	4T:66, 5T:14, 6T:8, 7T:2	4C:53, 5C:11, 6C:6, 7C:1, 8C:1	4G:11, 5G:5
Arthropoda	Insecta	Orthoptera	Pamphagidae	Prionotropis	Prionotropis hystrix	JX913764.1	15651	4A:135, 5A:79, 6A:31, 7A:9, 8A:7, 9A:2, 10A:2	4T:72, 5T:12, 6T:7, 7T:2, 12T:1	4C:31, 5C:4, 6C:4	4G:4, 5G:2
Arthropoda	Insecta	Orthoptera	Tetrigidae	Trachytettix	Trachytettix bufo	JX913766.1	14578	4A:157, 5A:71, 6A:44, 7A:17, 8A:7, 9A:12, 10A:3, 11A:1	4T:44, 5T:12, 6T:5	4C:17, 5C:7, 7C:1	4G:12, 5G:3, 6G:1
Arthropoda	Insecta	Orthoptera	Trigonopterygidae	Trigonopteryx	Trigonopteryx hopei	JX913767.1	16732	4A:199, 5A:92, 6A:37, 7A:15, 8A:4, 9A:1, 11A:1, 12A:1, 13A:1	4T:89, 5T:15, 6T:12, 7T:2, 9T:1	4C:10, 5C:5, 6C:1	4G:5, 5G:1
Arthropoda	Insecta	Orthoptera	Eumastacidae	Paramastax	Paramastax nigra	JX913772.1	14168	4A:123, 5A:65, 6A:31, 7A:25, 8A:3, 9A:1, 10A:1	4T:80, 5T:21, 6T:8, 7T:3, 8T:3, 9T:1	4C:10, 5C:4, 6C:1	4G:4, 5G:3, 6G:1
Arthropoda	Insecta	Orthoptera	Charilaidae	Hemicharilaus	Hemicharilaus monomorphus	JX913773.1	13291	4A:125, 5A:54, 6A:29, 7A:11, 8A:6, 9A:1	4T:42, 5T:13, 6T:5	4C:17, 5C:2, 6C:1	4G:2, 5G:1
Chordata	Actinopteri	Myctophiformes	Myctophidae	Notolychnus	Notolychnus valdiviae	AP012229.1	16039	4A:51, 5A:17, 6A:2	4T:34, 5T:7, 6T:4	4C:84, 5C:52, 6C:9, 9C:1, 10C:1, 12C:1	4G:21, 5G:11, 6G:2, 11G:1
Chordata	Actinopteri	Myctophiformes	Myctophidae	Diogenichthys	Diogenichthys atlanticus	AP012233.1	15701	4A:62, 5A:22, 6A:5, 7A:3	4T:32, 5T:12	4C:89, 5C:66, 6C:17, 10C:1, 11C:1	4G:21, 5G:5, 6G:2, 17G:1
Chordata	Actinopteri	Myctophiformes	Myctophidae	Krefftichthys	Krefftichthys anderssoni	AP012236.1	16959	4A:63, 5A:24, 6A:4, 7A:1	4T:50, 5T:15, 6T:4	4C:113, 5C:44, 6C:4, 12C:2	4G:30, 5G:12, 7G:2
Chordata	Actinopteri	Myctophiformes	Myctophidae	Centrobranchus	Centrobranchus choerocephalus	AP012237.1	16311	4A:67, 5A:25, 6A:6, 7A:1, 16A:1	4T:59, 5T:14, 6T:9, 7T:2	4C:92, 5C:36, 6C:3, 9C:1	4G:25, 5G:12, 6G:1
Chordata	Actinopteri	Myctophiformes	Myctophidae	Diaphus	Diaphus theta	AP012240.1	15906	4A:52, 5A:24, 6A:2	4T:24, 5T:3, 6T:2, 7T:1	4C:91, 5C:46, 6C:7	4G:22, 5G:11, 6G:1
Chordata	Actinopteri	Myctophiformes	Myctophidae	Lobianchia	Lobianchia gemellarii	AP012242.1	17035	4A:70, 5A:28, 6A:2	4T:41, 5T:6, 6T:1	4C:94, 5C:54, 6C:5, 8C:1, 9C:1	4G:20, 5G:6, 6G:1, 8G:1, 11G:1
Chordata	Actinopteri	Myctophiformes	Myctophidae	Triphoturus	Triphoturus nigrescens	AP012243.1	15678	4A:49, 5A:10, 6A:2, 7A:2, 15A:1	4T:23, 5T:6, 6T:2	4C:72, 5C:30, 6C:4	4G:33, 5G:12, 6G:1, 8G:1
Chordata	Actinopteri	Myctophiformes	Myctophidae	Taaningichthys	Taaningichthys minimus	AP012244.1	16112	4A:50, 5A:7, 6A:2, 7A:1	4T:44, 5T:10, 6T:4, 11T:1	4C:73, 5C:38, 6C:5	4G:35, 5G:13, 6G:2
Chordata	Actinopteri	Myctophiformes	Myctophidae	Stenobrachius	Stenobrachius leucopsarus	AP012245.1	15681	4A:51, 5A:20, 6A:3, 7A:1	4T:36, 5T:7, 6T:2	4C:81, 5C:36, 6C:6	4G:24, 5G:11
Chordata	Actinopteri	Myctophiformes	Myctophidae	Symbolophorus	Symbolophorus californiensis	AP012246.1	15772	4A:54, 5A:27, 6A:1, 7A:1	4T:29, 5T:8, 6T:2	4C:103, 5C:55, 6C:2, 7C:1, 10C:1	4G:25, 5G:15, 14G:1
Chordata	Actinopteri	Myctophiformes	Myctophidae	Nannobrachium	Nannobrachium ritteri	AP012247.1	16437	4A:61, 5A:19, 6A:1, 7A:1	4T:31, 5T:6, 6T:3, 7T:1, 14T:1	4C:94, 5C:36, 6C:9, 7C:2, 8C:1, 9C:1, 10C:2	4G:14, 5G:8, 6G:1
Chordata	Actinopteri	Myctophiformes	Myctophidae	Electrona	Electrona antarctica	AP012248.1	18228	4A:59, 5A:25, 6A:3, 7A:2	4T:41, 5T:8, 6T:2, 7T:1, 9T:1	4C:107, 5C:49, 6C:11, 7C:4, 9C:1, 11C:2	4G:39, 5G:15, 6G:2, 7G:1, 13G:1
Chordata	Actinopteri	Myctophiformes	Neoscopelidae	Solivomer	Solivomer arenidens	AP012249.1	16490	4A:71, 5A:26, 6A:4	4T:56, 5T:21, 6T:6, 10T:1	4C:83, 5C:56, 6C:17, 7C:1, 8C:2, 9C:1, 15C:1	4G:20, 5G:15, 6G:1
Chordata	Actinopteri	Myctophiformes	Myctophidae	Gymnoscopelus	Gymnoscopelus nicholsi	AP012250.1	15718	4A:45, 5A:13, 6A:2	4T:38, 5T:7, 6T:4	4C:75, 5C:32, 6C:4	4G:37, 5G:9, 6G:3
Chordata	Actinopteri	Myctophiformes	Myctophidae	Myctophum	Myctophum nitidulum	AP012255.1	16866	4A:74, 5A:23, 6A:6	4T:47, 5T:6, 6T:3	4C:96, 5C:56, 6C:8, 17C:1	4G:25, 5G:13, 11G:1
Chordata	Actinopteri	Myctophiformes	Myctophidae	Lampanyctus	Lampanyctus crocodilus	AP012258.1	16306	4A:62, 5A:17, 6A:1	4T:28, 5T:3, 6T:1, 12T:1	4C:84, 5C:41, 6C:2, 7C:1, 8C:1, 11C:1	4G:21, 5G:9
Chordata	Actinopteri	Myctophiformes	Myctophidae	Ceratoscopelus	Ceratoscopelus maderensis	AP012259.1	14460	4A:47, 5A:11, 6A:2	4T:34, 5T:6, 6T:1	4C:67, 5C:18, 6C:2	4G:34, 5G:6, 8G:1
Chordata	Actinopteri	Myctophiformes	Myctophidae	Bolinichthys	Bolinichthys pyrsobolus	AP012261.1	15688	4A:51, 5A:15, 6A:1	4T:30, 5T:11, 6T:2	4C:76, 5C:36, 6C:3, 7C:1, 12C:1	4G:30, 5G:8
Chordata	Actinopteri	Myctophiformes	Myctophidae	Notoscopelus	Notoscopelus elongatus	AP012262.1	16315	4A:60, 5A:19, 6A:3	4T:52, 5T:11, 6T:2, 7T:1, 11T:1	4C:79, 5C:34, 6C:4	4G:31, 5G:8
Chordata	Actinopteri	Myctophiformes	Myctophidae	Benthosema	Benthosema glaciale	AP012264.1	16159	4A:59, 5A:27, 6A:3	4T:38, 5T:4, 6T:2	4C:123, 5C:66, 6C:8, 8C:2, 10C:1	4G:29, 5G:9, 7G:1, 11G:1
Nematoda	Chromadorea	Rhabditida	Pratylenchidae	Pratylenchus	Pratylenchus vulnus	GQ332425.1	21656	4A:124, 5A:44, 6A:34, 7A:14, 8A:24, 9A:3, 10A:2	4T:250, 5T:117, 6T:75, 7T:69, 8T:35, 9T:22, 10T:16, 11T:4, 12T:3, 14T:1, 18T:1	4C:4	4G:16, 5G:5, 6G:1, 7G:1
Arthropoda	Insecta	Hemiptera	Reduviidae	Sirthenea	Sirthenea flavipes	NC_020143.1	15961	4A:163, 5A:73, 6A:39, 7A:23, 8A:9, 9A:2, 10A:2	4T:65, 5T:21, 6T:8, 7T:1	4C:22, 5C:7, 6C:1	4G:11, 5G:3, 6G:3, 12G:1
Arthropoda	Insecta	Hemiptera	Urostylididae	Urochela	Urochela quadrinotata	NC_020144.1	16587	4A:107, 5A:92, 6A:26, 7A:8, 8A:1	4T:103, 5T:45, 6T:15, 7T:5, 8T:2, 9T:2	4C:41, 5C:10, 6C:1, 7C:2	4G:12, 5G:2
Chordata	Actinopteri	Myctophiformes	Neoscopelidae	Scopelengys	Scopelengys tristis	NC_020149.1	16768	4A:74, 5A:23, 6A:4	4T:43, 5T:31, 6T:5, 7T:1	4C:99, 5C:68, 6C:20, 7C:5, 8C:1	4G:19, 5G:15, 6G:2, 7G:1
Chordata	Actinopteri	Myctophiformes	Neoscopelidae	Neoscopelus	Neoscopelus macrolepidotus	NC_020150.1	16609	4A:61, 5A:24, 6A:7	4T:50, 5T:15, 6T:5, 7T:3	4C:101, 5C:60, 6C:18, 7C:6, 8C:3, 11C:1	4G:24, 5G:16, 6G:2
Chordata	Actinopteri	Myctophiformes	Myctophidae	Lampadena	Lampadena atlantica	NC_020151.1	17807	4A:60, 5A:18, 6A:5	4T:36, 5T:14, 6T:4, 8T:1	4C:87, 5C:65, 6C:10, 7C:3, 8C:1	4G:30, 5G:14, 7G:1
Chordata	Amphibia	Gymnophiona	Dermophiidae	Geotrypetes	Geotrypetes seraphini	NC_020155.1	16293	4A:100, 5A:33, 6A:12, 7A:4, 8A:2	4T:137, 5T:38, 6T:13, 7T:3, 8T:2, 9T:1	4C:22, 5C:4, 7C:1, 8C:1	4G:5, 5G:1, 7G:1
Chordata	Actinopteri	Myctophiformes	Myctophidae	Protomyctophum	Protomyctophum arcticum	AB648910.1	10923	4A:29, 5A:15, 6A:3, 7A:1	4T:19, 5T:7, 7T:1	4C:65, 5C:48, 6C:2, 12C:1	4G:16, 5G:6
Chordata	Amphibia	Gymnophiona	Herpelidae	Boulengerula	Boulengerula taitana	NC_020154.1	16587	4A:92, 5A:46, 6A:9, 7A:5, 16A:1	4T:83, 5T:19, 6T:7, 7T:4, 8T:2, 9T:1, 13T:1	4C:32, 5C:8, 7C:2, 11C:1	4G:6, 5G:2
Arthropoda	Insecta	Odonata	Corduliidae	Cordulia	Cordulia aenea	JX963627.1	14488	4A:125, 5A:62, 6A:31, 7A:11, 8A:8, 9A:3, 10A:1, 11A:1	4T:78, 5T:21, 6T:8	4C:16, 5C:8, 6C:2, 11C:1	4G:7, 5G:2
Chordata	Actinopteri	Perciformes	Sebastidae	Helicolenus	Helicolenus avius	AB734123.1	16651	4A:57, 5A:27, 6A:4, 7A:2	4T:56, 5T:17, 6T:9, 7T:4	4C:92, 5C:45, 6C:15, 7C:1	4G:17, 5G:10, 6G:1
Chordata	Actinopteri	Cypriniformes	Leuciscidae	Leucaspius	Leucaspius delineatus	AP009307.1	16602	4A:62, 5A:16, 6A:5, 7A:1	4T:63, 5T:15, 6T:1, 7T:1, 8T:1, 10T:1	4C:61, 5C:29, 6C:7, 8C:1	4G:32, 5G:8
Arthropoda	Insecta	Hemiptera	Peloridiidae	Hackeriella	Hackeriella veitchi	NC_020309.1	15793	4A:156, 5A:55, 6A:26, 7A:14, 8A:4, 9A:2	4T:68, 5T:16, 6T:4, 9T:1	4C:39, 5C:12, 6C:3, 8C:2, 9C:1	4G:4
Arthropoda	Arachnida	Araneae	Euagridae	Phyxioschema	Phyxioschema suthepium	NC_020322.1	13931	4A:82, 5A:45, 6A:19, 7A:7, 9A:1, 10A:1	4T:133, 5T:64, 6T:19, 7T:14, 8T:7, 9T:3, 10T:1, 11T:1	4C:2	4G:47, 5G:14, 6G:5, 7G:2, 8G:3, 9G:1
Arthropoda	Arachnida	Araneae	Liphistiidae	Liphistius	Liphistius erawan	NC_020323.1	14197	4A:111, 5A:47, 6A:14, 7A:13, 8A:1	4T:100, 5T:40, 6T:7, 7T:4, 8T:2	4C:39, 5C:13, 6C:6, 7C:1, 9C:1	4G:16, 5G:7
Arthropoda	Arachnida	Araneae	Pholcidae	Pholcus	Pholcus phalangioides	NC_020324.1	14459	4A:44, 5A:4, 6A:2, 13A:1	4T:142, 5T:50, 6T:33, 7T:10, 8T:6	4C:12, 5C:5, 6C:1	4G:59, 5G:19, 6G:10, 7G:2
Arthropoda	Insecta	Orthoptera	Pamphagidae	Pseudotmethis	Pseudotmethis rubimarginis	NC_020330.1	15661	4A:145, 5A:80, 6A:33, 7A:8, 8A:9, 9A:1, 10A:1	4T:75, 5T:19, 6T:5, 8T:1, 14T:1	4C:21, 5C:2, 6C:2	4G:5, 5G:2
Chordata	Actinopteri	Gobiiformes	Gobiidae	Amoya	Amoya chusanensis	NC_020347.1	16486	4A:76, 5A:29, 6A:7, 7A:1	4T:52, 5T:17, 6T:6, 7T:2, 9T:1	4C:84, 5C:41, 6C:18, 7C:1	4G:13, 5G:7, 6G:1
Chordata	Actinopteri	Gobiiformes	Odontobutidae	Perccottus	Perccottus glenii	NC_020350.1	16487	4A:71, 5A:23, 6A:5, 7A:2	4T:82, 5T:28, 6T:9, 7T:3, 9T:1	4C:74, 5C:30, 6C:10, 8C:1	4G:26, 5G:11, 6G:1
Arthropoda	Insecta	Hemiptera	Pentatomidae	Dolycoris	Dolycoris baccarum	NC_020373.1	16549	4A:150, 5A:66, 6A:18, 7A:13, 10A:1	4T:88, 5T:20, 6T:6, 7T:2, 8T:1	4C:30, 5C:10, 6C:1, 7C:2	4G:8, 5G:4, 6G:1
Chordata	Aves	Passeriformes	Alaudidae	Alauda	Alauda arvensis	NC_020425.1	17018	4A:73, 5A:21, 6A:4, 7A:2	4T:24, 5T:10, 6T:3	4C:86, 5C:41, 6C:14, 8C:1, 10C:1, 14C:1	4G:14, 5G:2
Chordata	Actinopteri	Mugiliformes	Mugilidae	Moolgarda	Moolgarda cunnesius	NC_017902.2	16748	4A:71, 5A:30, 6A:7, 7A:2, 8A:2	4T:60, 5T:13, 6T:3, 7T:1	4C:84, 5C:29, 6C:18	4G:19, 5G:7, 6G:1
Cnidaria	Anthozoa	Malacalcyonacea	Euplexauridae	Euplexaura	Euplexaura crassa	NC_020458.1	18674	4A:73, 5A:18, 6A:4, 7A:2	4T:91, 5T:26, 6T:9	4C:37, 5C:11, 6C:2	4G:57, 5G:13, 6G:2, 7G:1, 8G:1
Arthropoda	Insecta	Diptera	Tephritidae	Procecidochares	Procecidochares utilis	NC_020463.1	15922	4A:159, 5A:79, 6A:28, 7A:15, 8A:5, 9A:2, 10A:3, 12A:2, 18A:1	4T:144, 5T:63, 6T:27, 7T:8, 8T:9, 9T:1, 10T:2, 11T:2, 12T:1, 13T:1	4C:11, 5C:3, 6C:1	5G:2
Chordata	Aves	Gruiformes	Gruidae	Balearica	Balearica pavonina	NC_020570.1	16786	4A:86, 5A:25, 6A:6, 7A:3, 8A:1	4T:26, 5T:7, 6T:4, 8T:1, 9T:1	4C:86, 5C:26, 6C:10, 7C:3, 8C:1	4G:15, 5G:3, 6G:2
Chordata	Aves	Passeriformes	Hirundinidae	Progne	Progne chalybea	NC_020605.1	18030	4A:69, 5A:55, 6A:6, 7A:1	4T:24, 5T:13, 6T:2	4C:79, 5C:37, 6C:19, 8C:2, 10C:1, 12C:1	4G:14, 5G:5, 6G:3
Chordata	Mammalia	Artiodactyla	Bovidae	Boselaphus	Boselaphus tragocamelus	NC_020614.1	16322	4A:86, 5A:37, 6A:11, 7A:5, 8A:1	4T:46, 5T:10, 6T:1, 7T:1	4C:50, 5C:17, 6C:3, 7C:1	4G:7, 5G:2, 6G:1
Chordata	Mammalia	Artiodactyla	Bovidae	Pseudoryx	Pseudoryx nghetinhensis	NC_020616.1	16358	4A:85, 5A:38, 6A:10, 7A:4, 8A:2	4T:49, 5T:10, 6T:6, 7T:2	4C:36, 5C:16, 6C:2, 7C:1	4G:6, 5G:2, 6G:1
Chordata	Mammalia	Artiodactyla	Bovidae	Taurotragus	Taurotragus derbianus	NC_020618.1	16399	4A:86, 5A:35, 6A:13, 7A:4, 8A:1	4T:51, 5T:13, 6T:1, 7T:1	4C:58, 5C:17, 6C:2, 11C:1	4G:4, 5G:4, 6G:1
Chordata	Mammalia	Artiodactyla	Bovidae	Damaliscus	Damaliscus pygargus	NC_020627.1	16385	4A:71, 5A:31, 6A:10, 7A:4, 8A:2	4T:41, 5T:13, 6T:2, 7T:1	4C:62, 5C:16, 6C:10	4G:9, 5G:5, 6G:1, 10G:1
Chordata	Mammalia	Artiodactyla	Bovidae	Hemitragus	Hemitragus jemlahicus	NC_020628.1	16712	4A:73, 5A:43, 6A:9, 7A:6	4T:48, 5T:11, 6T:3, 9T:1	4C:51, 5C:18, 6C:7, 10C:1	4G:3, 5G:3
Chordata	Mammalia	Artiodactyla	Bovidae	Oreamnos	Oreamnos americanus	NC_020630.1	16604	4A:74, 5A:41, 6A:11, 7A:5, 8A:1	4T:56, 5T:18, 6T:4, 7T:1	4C:41, 5C:14, 6C:9	4G:5, 5G:3, 6G:1
Chordata	Mammalia	Artiodactyla	Bovidae	Ovibos	Ovibos moschatus	NC_020631.1	16431	4A:76, 5A:37, 6A:10, 7A:7	4T:47, 5T:12, 6T:3	4C:46, 5C:19, 6C:6	4G:9, 5G:2
Chordata	Mammalia	Artiodactyla	Bovidae	Pseudois	Pseudois nayaur	NC_020632.1	16737	4A:80, 5A:38, 6A:10, 7A:6	4T:53, 5T:10, 6T:3, 7T:1	4C:52, 5C:20, 6C:5, 8C:1, 9C:1	4G:13, 5G:2
Arthropoda	Insecta	Odonata	Pseudolestidae	Pseudolestes	Pseudolestes mirabilis	NC_020636.1	15122	4A:143, 5A:66, 6A:35, 7A:8, 8A:8, 9A:3, 10A:1	4T:40, 5T:13, 6T:3, 7T:1	4C:31, 5C:7, 6C:5, 8C:1	4G:11, 5G:5, 6G:1
Chordata	Mammalia	Carnivora	Mustelidae	Arctonyx	Arctonyx collaris	NC_020645.1	16481	4A:69, 5A:37, 6A:8, 7A:4	4T:46, 5T:14, 6T:2	4C:53, 5C:11, 6C:6	4G:4, 5G:3, 6G:1, 9G:1
Chordata	Mammalia	Carnivora	Procyonidae	Nasua	Nasua nasua	NC_020647.1	16388	4A:71, 5A:31, 6A:10, 7A:7, 8A:1, 10A:1	4T:27, 5T:10, 6T:3, 7T:1	4C:50, 5C:14, 6C:3	4G:8, 5G:4, 6G:1, 9G:1
Chordata	Mammalia	Rodentia	Ctenomyidae	Ctenomys	Ctenomys leucodon	NC_020659.1	16216	4A:81, 5A:44, 6A:11, 7A:6, 8A:3, 10A:1	4T:78, 5T:17, 6T:6, 7T:1, 8T:1	4C:48, 5C:15, 6C:4	4G:6, 5G:4
Chordata	Mammalia	Rodentia	Octodontidae	Spalacopus	Spalacopus cyanus	NC_020660.1	16830	4A:88, 5A:39, 6A:8, 7A:7, 8A:2	4T:60, 5T:6, 6T:1, 7T:3	4C:44, 5C:20, 6C:8, 7C:1, 8C:1, 9C:1	4G:6, 5G:4
Chordata	Mammalia	Rodentia	Octodontidae	Octodon	Octodon degus	NC_020661.1	16798	4A:78, 5A:36, 6A:11, 7A:6, 8A:2	4T:58, 5T:11, 6T:3, 7T:1, 8T:1	4C:51, 5C:14, 6C:6	4G:9, 5G:7, 6G:2
Chordata	Actinopteri	Cichliformes	Cichlidae	Cheilochromis	Cheilochromis euchilus	NC_020672.1	16582	4A:71, 5A:24, 6A:5, 7A:1	4T:43, 5T:14, 6T:4, 7T:3, 11T:1	4C:97, 5C:50, 6C:12, 7C:2, 9C:1	4G:19, 5G:11, 6G:3
Chordata	Mammalia	Artiodactyla	Bovidae	Addax	Addax nasomaculatus	NC_020674.1	16751	4A:82, 5A:32, 6A:12, 7A:4, 8A:2	4T:49, 5T:11, 6T:4	4C:59, 5C:19, 6C:4	4G:9, 5G:3
Chordata	Mammalia	Artiodactyla	Bovidae	Aepyceros	Aepyceros melampus	NC_020675.1	16422	4A:85, 5A:35, 6A:11, 7A:5, 8A:2	4T:49, 5T:16, 6T:3, 7T:2	4C:54, 5C:15, 6C:2, 7C:1	4G:5, 5G:2
Chordata	Mammalia	Artiodactyla	Bovidae	Alcelaphus	Alcelaphus buselaphus	NC_020676.1	16373	4A:80, 5A:40, 6A:9, 7A:3, 8A:2	4T:38, 5T:14, 6T:5	4C:60, 5C:24, 6C:4, 10C:1	4G:12, 5G:4
Chordata	Mammalia	Artiodactyla	Cervidae	Alces	Alces alces	NC_020677.1	16417	4A:87, 5A:39, 6A:6, 7A:3, 8A:2	4T:83, 5T:27, 6T:3, 7T:2	4C:37, 5C:10, 6C:4, 9C:1, 13C:1	4G:8, 5G:4
Chordata	Mammalia	Artiodactyla	Antilocapridae	Antilocapra	Antilocapra americana	NC_020679.1	16352	4A:74, 5A:33, 6A:13, 7A:6, 8A:1	4T:32, 5T:10, 6T:1, 7T:2	4C:48, 5C:19, 6C:6, 8C:1	4G:7, 5G:3, 6G:1
Chordata	Mammalia	Artiodactyla	Delphinidae	Cephalorhynchus	Cephalorhynchus heavisidii	NC_020696.1	16371	4A:67, 5A:41, 6A:13, 7A:4, 8A:1	4T:54, 5T:11, 6T:5, 7T:1	4C:60, 5C:20, 6C:4	4G:6, 5G:4, 9G:1
Chordata	Mammalia	Artiodactyla	Hippopotamidae	Hexaprotodon	Hexaprotodon liberiensis	NC_020697.1	16396	4A:89, 5A:40, 6A:4, 7A:5, 9A:1	4T:29, 5T:8	4C:67, 5C:17, 6C:5	4G:9, 5G:2
Chordata	Mammalia	Artiodactyla	Bovidae	Connochaetes	Connochaetes taurinus	NC_020699.1	16410	4A:78, 5A:42, 6A:7, 7A:6, 8A:2	4T:37, 5T:12, 6T:1	4C:54, 5C:21, 6C:7	4G:7, 5G:5
Chordata	Mammalia	Artiodactyla	Bovidae	Dorcatragus	Dorcatragus megalotis	NC_020701.1	16378	4A:76, 5A:41, 6A:8, 7A:3, 8A:2	4T:66, 5T:14, 6T:4, 7T:2	4C:40, 5C:19, 6C:3	4G:6, 5G:4
Chordata	Mammalia	Artiodactyla	Bovidae	Gazella	Gazella subgutturosa	NC_020710.1	16433	4A:79, 5A:45, 6A:8, 7A:4, 8A:2	4T:56, 5T:15, 6T:3, 7T:1	4C:53, 5C:16, 6C:6	4G:7, 5G:3
Chordata	Mammalia	Artiodactyla	Cervidae	Hippocamelus	Hippocamelus antisensis	NC_020711.1	16410	4A:84, 5A:36, 6A:9, 7A:6, 10A:1	4T:71, 5T:23, 6T:7, 7T:1, 9T:1	4C:32, 5C:15, 6C:3, 10C:1	4G:5, 5G:2, 6G:1
Chordata	Mammalia	Artiodactyla	Bovidae	Kobus	Kobus ellipsiprymnus	NC_020715.1	16427	4A:79, 5A:33, 6A:12, 7A:3, 9A:1	4T:49, 5T:12, 6T:2, 7T:3	4C:53, 5C:14, 6C:2, 9C:1	4G:12, 5G:1
Chordata	Mammalia	Artiodactyla	Bovidae	Litocranius	Litocranius walleri	NC_020716.1	16438	4A:88, 5A:45, 6A:7, 7A:2, 8A:2	4T:57, 5T:11, 6T:4, 7T:2	4C:37, 5C:21, 7C:2	4G:4, 5G:4
Chordata	Mammalia	Artiodactyla	Bovidae	Madoqua	Madoqua saltiana	NC_020718.1	16402	4A:78, 5A:38, 6A:9, 7A:3, 8A:1, 10A:1	4T:52, 5T:15, 6T:6	4C:49, 5C:22, 6C:5, 8C:1	4G:11, 5G:3
Chordata	Mammalia	Artiodactyla	Bovidae	Nanger	Nanger soemmerringii	NC_020726.1	16379	4A:85, 5A:42, 6A:8, 7A:4, 8A:2	4T:56, 5T:13, 6T:5	4C:47, 5C:14, 6C:7	4G:4, 5G:3
Chordata	Mammalia	Artiodactyla	Bovidae	Ourebia	Ourebia ourebi	NC_020733.1	16392	4A:86, 5A:35, 6A:9, 7A:5, 8A:2	4T:49, 5T:14, 6T:3	4C:48, 5C:21, 6C:4, 8C:1	4G:12, 5G:5, 6G:1
Chordata	Mammalia	Artiodactyla	Bovidae	Pelea	Pelea capreolus	NC_020734.1	16589	4A:81, 5A:36, 6A:9, 7A:5, 8A:2	4T:38, 5T:17, 6T:3, 7T:3	4C:51, 5C:19, 6C:5, 7C:2	4G:11, 5G:2
Chordata	Mammalia	Artiodactyla	Suidae	Potamochoerus	Potamochoerus porcus	NC_020737.1	16693	4A:79, 5A:47, 6A:11, 7A:3, 8A:2	4T:31, 5T:12, 6T:3	4C:38, 5C:8, 6C:4	4G:9, 5G:6
Chordata	Mammalia	Artiodactyla	Bovidae	Raphicerus	Raphicerus campestris	NC_020741.1	16392	4A:87, 5A:38, 6A:8, 7A:4, 8A:1	4T:53, 5T:18, 6T:3	4C:48, 5C:16, 6C:3	4G:7, 5G:3
Chordata	Mammalia	Artiodactyla	Cervidae	Rucervus	Rucervus duvaucelii	NC_020743.1	16342	4A:77, 5A:40, 6A:9, 7A:5, 8A:1	4T:63, 5T:18, 6T:6, 7T:1	4C:42, 5C:11, 6C:5, 7C:1	4G:7, 5G:4
Chordata	Mammalia	Artiodactyla	Bovidae	Saiga	Saiga tatarica	NC_020746.1	16375	4A:88, 5A:40, 6A:9, 7A:3, 10A:1	4T:55, 5T:15, 6T:7, 7T:3	4C:37, 5C:12, 6C:3, 8C:1	4G:4, 5G:3, 11G:1
Chordata	Mammalia	Artiodactyla	Bovidae	Sylvicapra	Sylvicapra grimmia	NC_020747.1	16437	4A:81, 5A:30, 6A:12, 7A:5, 8A:1	4T:47, 5T:10, 6T:2	4C:46, 5C:17, 6C:4	4G:5, 5G:1
Chordata	Actinopteri	Salmoniformes	Salmonidae	Stenodus	Stenodus leucichthys	NC_020761.1	16864	4A:45, 5A:14, 6A:2	4T:41, 5T:15, 6T:1, 7T:1, 9T:1	4C:80, 5C:44, 6C:13, 9C:1	4G:28, 5G:12, 6G:1
Arthropoda	Insecta	Hemiptera	Malcidae	Chauliops	Chauliops fallax	NC_020772.1	15739	4A:182, 5A:86, 6A:32, 7A:11, 8A:9, 9A:1, 10A:1	4T:72, 5T:11, 6T:2, 7T:1, 8T:1	4C:20, 5C:12, 6C:1, 7C:2	4G:5, 5G:2, 6G:1, 7G:1
Arthropoda	Insecta	Orthoptera	Tristiridae	Tristira	Tristira magellanica	NC_020773.1	16494	4A:173, 5A:81, 6A:27, 7A:16, 8A:6, 9A:1	4T:95, 5T:43, 6T:11, 7T:1, 8T:1	4C:14, 5C:3	4G:9, 5G:1
Arthropoda	Insecta	Orthoptera	Lentulidae	Lentula	Lentula callani	NC_020774.1	15944	4A:166, 5A:72, 6A:35, 7A:20, 8A:8, 9A:1	4T:89, 5T:22, 6T:6, 11T:1	4C:10, 5C:1, 7C:1	4G:3, 5G:1
Arthropoda	Insecta	Orthoptera	Acrididae	Lithidiopsis	Lithidiopsis carinatus	NC_020775.1	15652	4A:140, 5A:64, 6A:30, 7A:16, 8A:7, 9A:1, 10A:1	4T:49, 5T:18, 6T:4, 7T:2, 8T:1	4C:24, 5C:6, 6C:3	4G:6, 5G:2
Arthropoda	Insecta	Orthoptera	Pyrgacrididae	Pyrgacris	Pyrgacris descampsi	NC_020776.1	15618	4A:141, 5A:63, 6A:24, 7A:11, 8A:3, 9A:2	4T:66, 5T:15, 6T:5, 7T:1	4C:22, 5C:5, 6C:1	4G:8, 5G:2, 6G:1
Arthropoda	Insecta	Orthoptera	Pneumoridae	Tanaocerus	Tanaocerus koebelei	NC_020777.1	15515	4A:142, 5A:60, 6A:25, 7A:14, 8A:5, 9A:2	4T:45, 5T:13, 6T:4, 8T:1	4C:16, 5C:8	4G:5, 5G:1, 6G:3
Arthropoda	Insecta	Orthoptera	Ommexechidae	Ommexecha	Ommexecha virens	NC_020778.1	15536	4A:157, 5A:77, 6A:33, 7A:10, 8A:9, 9A:1, 11A:1	4T:73, 5T:17, 6T:8, 7T:2	4C:17, 5C:2, 6C:1, 7C:1	4G:10, 5G:1, 6G:1
Arthropoda	Insecta	Lepidoptera	Sphingidae	Sphinx	Sphinx morio	NC_020780.1	15299	4A:159, 5A:43, 6A:32, 7A:10, 8A:4, 9A:3, 10A:2, 11A:1, 16A:1	4T:166, 5T:73, 6T:40, 7T:8, 8T:10, 9T:2, 10T:1, 11T:2, 16T:1	4C:12, 5C:9, 6C:3, 7C:1	4G:1, 5G:1
Chordata	Mammalia	Rodentia	Echimyidae	Proechimys	Proechimys longicaudatus	NC_020657.1	16816	4A:84, 5A:52, 6A:11, 7A:6, 8A:1	4T:71, 5T:9, 6T:7, 7T:1	4C:42, 5C:14, 6C:4	4G:8, 5G:5, 6G:1
Chordata	Mammalia	Primates	Cercopithecidae	Procolobus	Procolobus verus	NC_020666.1	16605	4A:71, 5A:38, 6A:7, 7A:6	4T:48, 5T:18, 6T:2, 7T:2	4C:65, 5C:20, 6C:6, 7C:1	4G:11, 5G:5
Chordata	Mammalia	Artiodactyla	Cervidae	Axis	Axis axis	NC_020680.1	16349	4A:80, 5A:39, 6A:8, 7A:4, 8A:1, 10A:1	4T:60, 5T:25, 6T:7	4C:48, 5C:7, 6C:6, 9C:1	4G:5, 5G:3
Chordata	Mammalia	Artiodactyla	Giraffidae	Okapia	Okapia johnstoni	NC_020730.1	16422	4A:79, 5A:43, 6A:9, 7A:4, 8A:2	4T:36, 5T:6, 6T:4, 7T:1	4C:55, 5C:24, 6C:7	4G:11, 5G:5, 7G:1
Chordata	Mammalia	Artiodactyla	Bovidae	Oreotragus	Oreotragus oreotragus	NC_020731.1	16526	4A:81, 5A:35, 6A:15, 7A:3, 8A:1, 10A:1	4T:62, 5T:14, 6T:2	4C:43, 5C:13, 6C:5, 18C:1	4G:10, 5G:5
Chordata	Mammalia	Artiodactyla	Bovidae	Antidorcas	Antidorcas marsupialis	NC_020678.1	16444	4A:89, 5A:43, 6A:7, 7A:4, 8A:2	4T:62, 5T:12, 6T:5, 7T:1	4C:37, 5C:17, 6C:5	4G:3, 5G:4
Chordata	Mammalia	Artiodactyla	Tragulidae	Hyemoschus	Hyemoschus aquaticus	NC_020714.1	16225	4A:77, 5A:29, 6A:11, 7A:1, 8A:1, 9A:1	4T:45, 5T:10, 6T:5	4C:50, 5C:18, 6C:4, 8C:2	4G:10, 5G:6
Chordata	Mammalia	Artiodactyla	Bovidae	Neotragus	Neotragus moschatus	NC_020728.1	16399	4A:70, 5A:33, 6A:10, 7A:4, 8A:4	4T:43, 5T:14, 6T:6	4C:47, 5C:19, 6C:6, 7C:1	4G:6, 5G:3, 6G:2, 7G:1
Chordata	Mammalia	Artiodactyla	Bovidae	Philantomba	Philantomba maxwellii	NC_020735.1	16440	4A:76, 5A:40, 6A:9, 7A:4, 8A:1, 10A:1	4T:59, 5T:12, 6T:2	4C:51, 5C:12, 6C:1, 7C:1	4G:7, 5G:3
Chordata	Aves	Gruiformes	Gruidae	Anthropoides	Anthropoides virgo	NC_020573.1	16541	4A:83, 5A:28, 6A:9, 7A:3	4T:28, 5T:9, 6T:4, 7T:2, 10T:1	4C:67, 5C:25, 6C:9, 7C:1, 8C:1, 9C:1	4G:17, 5G:2, 6G:2
Chordata	Mammalia	Primates	Cercopithecidae	Simias	Simias concolor	NC_020667.1	16561	4A:80, 5A:36, 6A:9, 7A:6	4T:48, 5T:8, 6T:2, 11T:1	4C:58, 5C:22, 6C:4, 7C:1, 9C:1	4G:5, 5G:1
Chordata	Actinopteri	Gobiiformes	Gobiidae	Lophiogobius	Lophiogobius ocellicauda	NC_020783.1	16663	4A:76, 5A:25, 6A:7, 7A:1, 8A:1	4T:61, 5T:25, 6T:8, 7T:5	4C:80, 5C:58, 6C:21, 7C:3	4G:22, 5G:13
Chordata	Actinopteri	Gobiiformes	Gobiidae	Chaeturichthys	Chaeturichthys stigmatias	NC_020786.1	18562	4A:78, 5A:42, 6A:10, 7A:2, 8A:1	4T:91, 5T:49, 6T:13, 7T:5, 8T:1, 9T:1	4C:104, 5C:29, 6C:14, 7C:5, 8C:3, 9C:1	4G:29, 5G:11, 6G:2
Chordata	Mammalia	Artiodactyla	Bovidae	Tetracerus	Tetracerus quadricornis	NC_020788.1	16343	4A:90, 5A:38, 6A:11, 7A:6, 9A:1	4T:56, 5T:13, 6T:3, 7T:1	4C:43, 5C:15, 6C:3, 7C:1	4G:7, 5G:4
Chordata	Mammalia	Rodentia	Octodontidae	Tympanoctomys	Tympanoctomys barrerae	NC_020792.1	16863	4A:80, 5A:39, 6A:11, 7A:9, 8A:1	4T:73, 5T:11, 6T:3, 9T:1	4C:29, 5C:15, 6C:7, 11C:1	4G:10, 5G:3
Chordata	Mammalia	Artiodactyla	Bovidae	Oryx	Oryx beisa	NC_020793.1	16518	4A:78, 5A:33, 6A:13, 7A:4, 8A:2	4T:57, 5T:15, 6T:2	4C:47, 5C:22, 6C:5	4G:7, 5G:2, 6G:1
Chordata	Mammalia	Artiodactyla	Bovidae	Redunca	Redunca arundinum	NC_020794.1	16439	4A:88, 5A:39, 6A:8, 7A:6, 8A:1, 9A:1	4T:39, 5T:11, 6T:6	4C:47, 5C:20, 6C:4, 7C:1, 9C:1, 12C:1	4G:12, 5G:2, 6G:1
Platyhelminthes	Cestoda	Cyclophyllidea	Taeniidae	Versteria	Versteria mustelae	AB732957.1	13582	4A:24, 5A:7, 6A:1	4T:182, 5T:69, 6T:45, 7T:17, 8T:11, 9T:2, 10T:2	4C:4	4G:22, 5G:7, 6G:3
Annelida	Polychaeta	Eunicida	Diurodrilidae	Diurodrilus	Diurodrilus subterraneus	KC790350.1	13025	4A:41, 5A:14, 6A:4, 8A:1	4T:107, 5T:40, 6T:11, 7T:3, 8T:1	4C:45, 5C:21, 6C:7, 7C:2	4G:10, 5G:1, 6G:1
Arthropoda	Insecta	Hemiptera	Cercopidae	Paphnutius	Paphnutius ruficeps	NC_021100.1	14841	4A:109, 5A:61, 6A:12, 7A:11, 8A:5, 9A:1	4T:120, 5T:41, 6T:14, 7T:3, 8T:3, 11T:1	4C:12, 5C:3, 6C:1	4G:13, 5G:2, 6G:1
Arthropoda	Insecta	Orthoptera	Acrididae	Gomphocerus	Gomphocerus sibiricus	NC_021103.1	15590	4A:162, 5A:78, 6A:27, 7A:25, 8A:4	4T:101, 5T:23, 6T:13, 7T:3	4C:13, 5C:2, 6C:1	4G:9, 5G:1
Chordata	Amphibia	Caudata	Hynobiidae	Salamandrella	Salamandrella tridactyla	NC_021106.1	16342	4A:88, 5A:42, 6A:12, 7A:4, 8A:3, 13A:1	4T:103, 5T:34, 6T:15, 7T:8, 8T:3, 11T:1	4C:47, 5C:14, 6C:5, 7C:1	4G:17, 5G:3, 6G:2
Arthropoda	Insecta	Lepidoptera	Pieridae	Hebomoia	Hebomoia glaucippe	NC_021123.1	15701	4A:151, 5A:48, 6A:25, 7A:11, 8A:2, 9A:4, 10A:4, 11A:2, 12A:1	4T:163, 5T:70, 6T:35, 7T:18, 8T:7, 9T:6, 10T:3, 11T:2, 19T:1	4C:18, 5C:13, 6C:4	4G:2
Platyhelminthes	Cestoda	Cyclophyllidea	Dipylidiidae	Dipylidium	Dipylidium caninum	NC_021145.1	14296	4A:24, 5A:5, 6A:1, 7A:4	4T:238, 5T:113, 6T:70, 7T:42, 8T:10, 9T:7, 10T:2	4C:3	4G:16, 5G:2
Arthropoda	Insecta	Lepidoptera	Nymphalidae	Timelaea	Timelaea maculata	NC_021090.1	15178	4A:135, 5A:47, 6A:22, 7A:9, 8A:4, 9A:4, 10A:3, 11A:2	4T:180, 5T:76, 6T:28, 7T:17, 8T:11, 9T:3, 10T:5, 11T:1, 19T:1	4C:11, 5C:10, 6C:2	4G:2, 5G:3
Chordata	Actinopteri	Scombriformes	Scombridae	Scomber	Scomber japonicus	AB102724.1	16568	4A:75, 5A:20, 6A:6, 7A:1	4T:29, 5T:19, 6T:2, 8T:1	4C:82, 5C:39, 6C:10, 7C:2	4G:22, 5G:9, 6G:1
Chordata	Ascidiacea	Stolidobranchia	Styelidae	Botryllus	Botryllus schlosseri	NC_021463.1	14928	4A:52, 5A:23, 6A:9, 7A:2, 8A:3, 9A:1	4T:211, 5T:89, 6T:46, 7T:32, 8T:13, 9T:5, 10T:5, 11T:6, 12T:3, 13T:4, 14T:1, 16T:1, 17T:1	4C:6, 5C:3	4G:20, 5G:5, 6G:2, 7G:1, 8G:1
Chordata	Ascidiacea	Stolidobranchia	Styelidae	Polycarpa	Polycarpa mytiligera	NC_021464.1	14424	4A:50, 5A:18, 6A:8, 7A:7	4T:205, 5T:75, 6T:55, 7T:33, 8T:17, 9T:8	4C:6	4G:27, 5G:4
Chordata	Ascidiacea	Stolidobranchia	Pyuridae	Pyura	Pyura gangelion	NC_021465.1	14418	4A:61, 5A:29, 6A:7, 7A:5, 8A:2	4T:149, 5T:76, 6T:53, 7T:31, 8T:9, 9T:13, 10T:3, 11T:4, 12T:1, 13T:1, 14T:1, 16T:1, 18T:1, 19T:2	4C:2, 5C:2	4G:18, 5G:9, 6G:5, 9G:1
Chordata	Ascidiacea	Stolidobranchia	Pyuridae	Halocynthia	Halocynthia spinosa	NC_021466.1	15074	4A:27, 5A:8, 6A:1, 7A:2, 9A:1	4T:180, 5T:85, 6T:57, 7T:34, 8T:27, 9T:10, 10T:5, 11T:5, 17T:2	4C:7, 5C:1	4G:72, 5G:32, 6G:7, 7G:3, 12G:1
Chordata	Ascidiacea	Phlebobranchia	Corellidae	Rhodosoma	Rhodosoma turcicum	NC_021468.1	14677	4A:38, 5A:11, 6A:2, 7A:1, 8A:1	4T:204, 5T:89, 6T:35, 7T:33, 8T:11, 9T:10, 10T:3, 11T:3, 12T:1, 14T:1	4C:5	4G:39, 5G:18, 6G:9, 7G:1
Chordata	Ascidiacea	Phlebobranchia	Ascidiidae	Ascidiella	Ascidiella aspersa	NC_021469.1	17146	4A:24, 5A:9, 6A:6, 7A:1	4T:148, 5T:87, 6T:32, 7T:15, 8T:1, 9T:4, 10T:2, 11T:1	4C:23, 5C:9, 6C:1, 7C:2	4G:83, 5G:35, 6G:15, 7G:2, 11G:1
Arthropoda	Insecta	Lepidoptera	Nymphalidae	Melanitis	Melanitis leda	NC_021370.1	15122	4A:149, 5A:47, 6A:18, 7A:10, 8A:3, 9A:4, 10A:1, 11A:1	4T:177, 5T:70, 6T:33, 7T:18, 8T:6, 9T:3, 10T:4, 11T:3, 12T:1, 13T:1, 19T:1	4C:24, 5C:13, 7C:1	4G:3, 5G:2
Arthropoda	Insecta	Orthoptera	Tettigoniidae	Mecopoda	Mecopoda elongata	NC_021380.1	15284	4A:102, 5A:42, 6A:14, 7A:4, 8A:3, 9A:1, 10A:2	4T:123, 5T:38, 6T:16, 7T:7, 8T:1	4C:26, 5C:6, 6C:1, 10C:1	4G:10, 5G:2
Arthropoda	Insecta	Archaeognatha	Machilidae	Songmachilis	Songmachilis xinxiangensis	NC_021384.1	15473	4A:151, 5A:50, 6A:27, 7A:12, 8A:1, 10A:1	4T:147, 5T:53, 6T:21, 7T:4, 8T:3, 9T:2	4C:17, 5C:4, 6C:1	4G:5, 5G:1
Arthropoda	Insecta	Lepidoptera	Tortricidae	Adoxophyes	Adoxophyes orana	NC_021396.1	15343	4A:148, 5A:54, 6A:24, 7A:16, 8A:2, 9A:2, 10A:4, 11A:3, 12A:1	4T:163, 5T:81, 6T:29, 7T:15, 8T:9, 9T:3, 10T:1, 11T:2, 18T:1	4C:20, 5C:11, 6C:3	4G:2, 6G:1
Arthropoda	Insecta	Orthoptera	Prophalangopsidae	Tarragoilus	Tarragoilus diuturnus	NC_021397.1	16144	4A:121, 5A:44, 6A:18, 7A:12, 8A:5	4T:78, 5T:32, 6T:12, 7T:1, 8T:1, 9T:1	4C:50, 5C:29, 6C:9, 8C:1	4G:14, 5G:10, 6G:1, 7G:2, 8G:1, 12G:1
Arthropoda	Chilopoda	Lithobiomorpha	Henicopidae	Cermatobius	Cermatobius longicornis	NC_021403.1	16833	4A:119, 5A:51, 6A:19, 7A:16, 8A:1, 19A:1	4T:71, 5T:29, 6T:6, 7T:1, 8T:2	4C:62, 5C:31, 6C:11, 7C:7, 8C:1	4G:23, 5G:6, 6G:2
Chordata	Actinopteri	Perciformes	Serranidae	Plectropomus	Plectropomus areolatus	NC_021405.1	16770	4A:69, 5A:31, 6A:11, 7A:2, 8A:1	4T:57, 5T:22, 6T:6, 7T:4	4C:62, 5C:25, 6C:6, 14C:1	4G:20, 5G:6
Arthropoda	Insecta	Neuroptera	Osmylidae	Thyridosmylus	Thyridosmylus langii	NC_021415.1	16221	4A:130, 5A:69, 6A:25, 7A:12, 8A:4, 9A:4	4T:182, 5T:70, 6T:41, 7T:14, 8T:11, 12T:1	4C:20, 5C:5, 6C:1	4G:8, 5G:1
Porifera	Demospongiae	Dictyoceratida	Spongiidae	Hyattella	Hyattella sinuosa	NC_021422.1	16422	4A:72, 5A:20, 6A:9, 7A:1, 8A:1	4T:150, 5T:68, 6T:26, 7T:18, 8T:8, 9T:5, 10T:1	4C:22, 5C:3, 6C:1, 7C:1	4G:101, 5G:62, 6G:22, 7G:5, 8G:1
Arthropoda	Insecta	Neuroptera	Myrmeleontidae	Ascalohybris	Ascalohybris subjacens	NC_021428.1	15873	4A:123, 5A:67, 6A:30, 7A:13, 8A:2, 9A:1, 10A:2, 11A:1	4T:121, 5T:38, 6T:11, 7T:7, 8T:6, 10T:1	4C:15, 5C:8, 6C:5	4G:6, 5G:4
Chordata	Mammalia	Artiodactyla	Ziphiidae	Ziphius	Ziphius cavirostris	NC_021435.1	16349	4A:70, 5A:37, 6A:9, 7A:5, 8A:3	4T:44, 5T:15, 7T:1, 8T:1	4C:52, 5C:13, 6C:3	4G:8, 5G:2, 8G:1
Chordata	Actinopteri	Syngnathiformes	Syngnathidae	Hippocampus	Hippocampus histrix	NC_021454.1	16523	4A:103, 5A:37, 6A:9, 7A:2	4T:73, 5T:23, 6T:4, 7T:2, 8T:1, 10T:1	4C:54, 5C:17, 6C:8	4G:10, 5G:10, 6G:1, 7G:1
Arthropoda	Malacostraca	Decapoda	Lithodidae	Paralithodes	Paralithodes brevipes	NC_021458.1	16303	4A:147, 5A:37, 6A:22, 7A:7, 8A:4, 10A:1	4T:146, 5T:62, 6T:22, 7T:12, 8T:4	4C:19, 5C:8, 6C:2	4G:9, 5G:1, 6G:1
Chordata	Actinopteri	Perciformes	Hexagrammidae	Hexagrammos	Hexagrammos agrammus	NC_021459.1	16514	4A:64, 5A:21, 6A:6	4T:49, 5T:14, 6T:3, 7T:2, 8T:1, 11T:1	4C:94, 5C:53, 6C:15	4G:19, 5G:11
Arthropoda	Insecta	Hemiptera	Aphididae	Pterocomma	Pterocomma pilosum	KC840676.1	12529	4A:151, 5A:57, 6A:20, 7A:17, 8A:11, 9A:2, 11A:1, 12A:2, 22A:1	4T:127, 5T:49, 6T:24, 7T:10, 8T:2, 9T:1, 10T:1, 14T:1	4C:3, 5C:1, 7C:1
Chordata	Mammalia	Artiodactyla	Bovidae	Naemorhedus	Naemorhedus goral	NC_021381.1	16555	4A:78, 5A:36, 6A:8, 7A:6, 8A:1	4T:50, 5T:13, 6T:4, 7T:1	4C:53, 5C:15, 6C:4, 7C:1	4G:5, 5G:2, 6G:1
Arthropoda	Insecta	Hemiptera	Reduviidae	Sphedanolestes	Sphedanolestes impressicollis	KC887536.1	15076	4A:138, 5A:72, 6A:20, 7A:14, 8A:5, 9A:1	4T:63, 5T:9, 6T:5	4C:26, 5C:12, 6C:2	4G:11, 5G:4, 7G:3, 12G:1
Chordata	Actinopteri	Siluriformes	Sisoridae	Gagata	Gagata dolichonema	NC_021596.1	16538	4A:88, 5A:29, 6A:5, 7A:2	4T:45, 5T:8, 6T:3, 7T:1	4C:75, 5C:29, 6C:11	4G:15, 5G:7, 6G:1
Chordata	Actinopteri	Siluriformes	Sisoridae	Glyptosternon	Glyptosternon maculatum	NC_021597.1	16539	4A:84, 5A:32, 6A:7, 7A:1	4T:51, 5T:13, 6T:3, 7T:1, 8T:2, 16T:1	4C:64, 5C:37, 6C:8, 7C:2	4G:23, 5G:12
Chordata	Actinopteri	Siluriformes	Sisoridae	Glaridoglanis	Glaridoglanis andersonii	NC_021600.1	16532	4A:82, 5A:28, 6A:3, 7A:2	4T:46, 5T:4, 6T:1, 12T:1	4C:73, 5C:39, 6C:8, 7C:3	4G:17, 5G:12, 7G:1
Chordata	Actinopteri	Siluriformes	Sisoridae	Pseudecheneis	Pseudecheneis sulcata	NC_021605.1	16474	4A:85, 5A:31, 6A:8, 7A:1	4T:55, 5T:7, 6T:2, 11T:1	4C:73, 5C:22, 6C:8	4G:13, 5G:8
Chordata	Actinopteri	Siluriformes	Sisoridae	Bagarius	Bagarius yarrelli	NC_021606.1	16503	4A:89, 5A:27, 6A:2, 7A:2	4T:58, 5T:11, 6T:4, 7T:1, 8T:1, 9T:1, 13T:1	4C:65, 5C:41, 6C:13, 7C:1, 9C:1	4G:19, 5G:15, 6G:2, 7G:1
Chordata	Mammalia	Artiodactyla	Bovidae	Capra	Capra hircus	AB735773.1	13900	4A:49, 5A:28, 6A:8, 7A:4, 8A:1	4T:49, 5T:16, 6T:2	4C:36, 5C:18, 6C:7, 7C:1	4G:6, 5G:3
Arthropoda	Malacostraca	Decapoda	Majidae	Chionoecetes	Chionoecetes japonicus	AB735678.1	15341	4A:111, 5A:30, 6A:19, 7A:3, 8A:4, 9A:1, 10A:1	4T:136, 5T:44, 6T:19, 7T:10, 8T:4	4C:24, 5C:12, 6C:1	4G:8, 5G:3, 6G:1, 7G:1
Chordata	Aves	Passeriformes	Paridae	Remiz	Remiz consobrinus	NC_021641.1	16737	4A:65, 5A:25, 6A:5, 7A:2	4T:21, 5T:5, 8T:1, 9T:1, 10T:1	4C:100, 5C:54, 6C:19, 7C:6, 8C:4	4G:14, 5G:1, 6G:1
Nematoda	Chromadorea	Rhabditida	Ascaridiidae	Ascaridia	Ascaridia columbae	NC_021643.1	13931	4A:44, 5A:14, 6A:3, 7A:3	4T:224, 5T:104, 6T:46, 7T:41, 8T:9, 9T:11, 10T:2	4C:1, 5C:1	4G:38, 5G:12, 6G:7
Arthropoda	Insecta	Hymenoptera	Megaspilidae	Conostigmus	Conostigmus sp.	KF015227.1	16315	4A:149, 5A:71, 6A:30, 7A:10, 8A:6, 9A:3, 14A:1	4T:157, 5T:48, 6T:22, 7T:9, 8T:5, 10T:2	4C:14, 5C:5, 8C:1	5G:1
Arthropoda	Malacostraca	Decapoda	Synaxidae	Palinurellus	Palinurellus wieneckii	NC_021753.1	15699	4A:97, 5A:41, 6A:14, 7A:5, 8A:4, 9A:2	4T:88, 5T:38, 6T:9, 7T:4, 8T:3, 9T:1	4C:33, 5C:17, 6C:2, 12C:1	4G:21, 5G:6, 6G:1
Chordata	Actinopteri	Acropomatiformes	Pentacerotidae	Pentaceros	Pentaceros japonicus	NC_021758.1	16506	4A:58, 5A:21, 6A:6, 7A:1	4T:42, 5T:11, 6T:2, 7T:1	4C:78, 5C:62, 6C:10	4G:21, 5G:17, 6G:3
Chordata	Actinopteri	Scombriformes	Centrolophidae	Schedophilus	Schedophilus velaini	NC_021759.1	16571	4A:55, 5A:24, 6A:8, 7A:1	4T:52, 5T:13, 6T:2, 7T:1	4C:81, 5C:42, 6C:17	4G:16, 5G:10
Chordata	Actinopteri	Gobiiformes	Odontobutidae	Micropercops	Micropercops swinhonis	NC_021763.1	16493	4A:65, 5A:28, 6A:5	4T:81, 5T:16, 6T:2, 7T:1, 8T:1	4C:61, 5C:21, 6C:12	4G:22, 5G:9, 6G:3
Arthropoda	Insecta	Lepidoptera	Saturniidae	Attacus	Attacus atlas	NC_021770.1	15282	4A:138, 5A:60, 6A:29, 7A:18, 8A:4, 9A:4, 10A:2, 11A:1	4T:150, 5T:55, 6T:41, 7T:17, 8T:9, 9T:4, 10T:2, 13T:1, 19T:1	4C:17, 5C:12, 6C:5, 7C:3	4G:1, 5G:3, 6G:2
Chordata	Aves	Psittaciformes	Psittacidae	Rhynchopsitta	Rhynchopsitta terrisi	NC_021771.1	17027	4A:73, 5A:30, 6A:7, 7A:2	4T:24, 5T:3, 6T:2, 7T:1, 9T:1	4C:76, 5C:39, 6C:9, 7C:7, 8C:1	4G:23, 5G:3, 6G:1
Chordata	Chondrichthyes	Orectolobiformes	Orectolobidae	Orectolobus	Orectolobus japonicus	KF111729.1	16706	4A:70, 5A:53, 6A:9, 7A:3, 8A:2, 10A:1, 12A:1	4T:73, 5T:15, 6T:4, 7T:2	4C:40, 5C:15, 6C:4, 9C:1	4G:6, 5G:2, 6G:2
Arthropoda	Diplopoda	Callipodida	Callipodidae	Abacion	Abacion magnum	NC_021932.1	15160	4A:119, 5A:45, 6A:15, 7A:12, 8A:3	4T:76, 5T:23, 6T:9, 7T:2, 9T:1	4C:62, 5C:17, 6C:11, 7C:1	4G:6, 5G:1, 6G:1
Arthropoda	Diplopoda	Polydesmida	Xystodesmidae	Appalachioria	Appalachioria falcifera	NC_021933.1	15282	4A:23, 5A:4, 6A:1, 7A:1, 8A:3	4T:236, 5T:98, 6T:42, 7T:16, 8T:7, 9T:4	4C:10, 5C:5, 6C:1	4G:80, 5G:31, 6G:17, 7G:5, 8G:1
Arthropoda	Insecta	Lepidoptera	Bombycidae	Rondotia	Rondotia menciana	NC_021962.1	15301	4A:162, 5A:58, 6A:30, 7A:10, 8A:6, 9A:6, 10A:2, 11A:1, 16A:1	4T:151, 5T:57, 6T:25, 7T:14, 8T:10, 9T:2, 10T:2, 11T:1, 17T:1	4C:27, 5C:14, 6C:2, 7C:1, 8C:1	4G:8, 5G:3, 6G:1
Chordata	Chondrichthyes	Rajiformes	Rajidae	Hongeo	Hongeo koreana	NC_021963.1	16905	4A:66, 5A:33, 6A:9, 7A:2, 12A:1	4T:54, 5T:20, 6T:3, 7T:6, 8T:1	4C:73, 5C:42, 6C:12	4G:17, 5G:8, 6G:4
Arthropoda	Malacostraca	Decapoda	Alvinocarididae	Nautilocaris	Nautilocaris saintlaurentae	NC_021971.1	15928	4A:122, 5A:46, 6A:22, 7A:7, 8A:2, 10A:1	4T:108, 5T:36, 6T:8, 7T:7, 8T:4, 9T:1, 22T:1	4C:43, 5C:21, 6C:4, 7C:2	4G:7, 5G:1, 6G:1
Chordata	Mammalia	Rodentia	Gliridae	Graphiurus	Graphiurus kelleni	HE978360.1	16596	4A:81, 5A:34, 6A:7, 7A:2, 8A:2, 11A:1	4T:75, 5T:24, 6T:6, 7T:1	4C:52, 5C:14, 6C:1	4G:4, 5G:3
Mollusca	Gastropoda	Neomphalida	Peltospiridae	Chrysomallon	Chrysomallon squamiferum	AP013032.1	15388	4A:88, 5A:31, 6A:9, 7A:8, 8A:2	4T:134, 5T:71, 6T:29, 7T:14, 8T:11, 9T:1	4C:14, 5C:2, 6C:1	4G:29, 5G:8, 6G:1
Chordata	Actinopteri	Cypriniformes	Gobionidae	Biwia	Biwia springeri	AP011360.1	16606	4A:78, 5A:24, 6A:7, 7A:2	4T:60, 5T:18, 6T:3, 7T:1	4C:62, 5C:31, 6C:12, 7C:1	4G:29, 5G:12, 6G:2
Chordata	Actinopteri	Cypriniformes	Gobionidae	Hemibarbus	Hemibarbus umbrifer	AP011415.1	16611	4A:74, 5A:21, 6A:3, 7A:1	4T:52, 5T:15, 6T:5, 7T:1	4C:76, 5C:32, 6C:16	4G:24, 5G:8, 6G:1
Mollusca	Bivalvia	Cardiida	Cardiidae	Fulvia	Fulvia mutica	AB809077.1	19110	4A:95, 5A:32, 6A:12, 7A:3	4T:196, 5T:64, 6T:30, 7T:16, 8T:7, 9T:1, 16T:1	4C:21, 5C:7, 6C:6, 7C:2, 10C:1	4G:77, 5G:21, 6G:15, 7G:3
Chordata	Actinopteri	Perciformes	Serranidae	Variola	Variola albimarginata	NC_022139.1	16768	4A:65, 5A:23, 6A:9, 7A:2, 8A:1	4T:55, 5T:21, 6T:5	4C:69, 5C:26, 6C:4, 8C:4	4G:18, 5G:5
Chordata	Actinopteri	Perciformes	Serranidae	Triso	Triso dermopterus	NC_022140.1	16605	4A:66, 5A:27, 6A:7, 7A:3, 8A:1	4T:49, 5T:11, 6T:3, 8T:1, 9T:1	4C:86, 5C:51, 6C:12, 7C:4, 8C:1, 9C:1	4G:29, 5G:9, 6G:3, 7G:2
Chordata	Actinopteri	Perciformes	Serranidae	Aethaloperca	Aethaloperca rogaa	NC_022141.1	16538	4A:61, 5A:32, 6A:7, 7A:3	4T:48, 5T:20, 6T:6	4C:75, 5C:25, 6C:6, 7C:1	4G:16, 5G:8, 6G:2
Chordata	Lepidosauria	Squamata	Colubridae	Oocatochus	Oocatochus rufodorsatus	NC_022146.1	17159	4A:90, 5A:33, 6A:13, 7A:7, 8A:3, 9A:3	4T:35, 5T:17, 6T:2, 7T:2	4C:57, 5C:20, 6C:3, 7C:3, 9C:4	4G:15, 5G:7, 6G:4
Chordata	Actinopteri	Perciformes	Cottidae	Enophrys	Enophrys diceraus	NC_022147.1	16976	4A:60, 5A:27, 6A:5	4T:78, 5T:28, 6T:6	4C:89, 5C:44, 6C:9, 7C:1	4G:28, 5G:17
Chordata	Actinopteri	Perciformes	Cottidae	Mesocottus	Mesocottus haitej	NC_022181.1	16527	4A:60, 5A:22, 6A:5	4T:43, 5T:16, 6T:1, 7T:1, 8T:2, 9T:1	4C:97, 5C:35, 6C:14, 7C:1, 10C:1	4G:28, 5G:19, 6G:3
Chordata	Mammalia	Rodentia	Pedetidae	Pedetes	Pedetes capensis	HE983623.1	15370	4A:64, 5A:23, 6A:13, 7A:6	4T:70, 5T:18, 6T:8, 8T:1	4C:36, 5C:9, 6C:3	4G:4, 5G:2
Chordata	Actinopteri	Esociformes	Esocidae	Esox	Esox niger	AP013046.1	15936	4A:79, 5A:24, 6A:10, 7A:1	4T:76, 5T:25, 6T:6, 7T:1	4C:76, 5C:44, 6C:12, 7C:1	4G:17, 5G:12, 6G:3
Chordata	Actinopteri	Esociformes	Umbridae	Novumbra	Novumbra hubbsi	AP013047.1	16567	4A:82, 5A:26, 6A:15, 7A:1	4T:84, 5T:34, 6T:8, 7T:2	4C:69, 5C:30, 6C:11, 7C:1	4G:18, 5G:11, 6G:2, 8G:1
Chordata	Actinopteri	Salmoniformes	Salmonidae	Parahucho	Parahucho perryi	AP013048.1	16220	4A:66, 5A:18, 6A:2, 7A:1	4T:54, 5T:13, 6T:1, 11T:1	4C:64, 5C:37, 6C:5, 9C:1	4G:17, 5G:12, 6G:1
Chordata	Actinopteri	Esociformes	Umbridae	Umbra	Umbra pygmaea	AP013049.1	16513	4A:84, 5A:24, 6A:6, 7A:1	4T:92, 5T:22, 6T:5, 7T:2	4C:96, 5C:43, 6C:13, 7C:2, 8C:4	4G:22, 5G:9, 6G:2
Chordata	Actinopteri	Salmoniformes	Salmonidae	Prosopium	Prosopium cylindraceum	AP013050.1	16077	4A:53, 5A:12, 7A:1	4T:46, 5T:19, 6T:2, 7T:1	4C:80, 5C:46, 6C:5	4G:22, 5G:11, 6G:2
Cnidaria	Anthozoa	Actiniaria	Actiniidae	Urticina	Urticina eques	HG423144.1	20458	4A:89, 5A:22, 6A:9, 7A:3, 8A:1, 9A:1	4T:154, 5T:64, 6T:20, 7T:13, 8T:4	4C:49, 5C:21, 6C:8, 7C:1, 9C:1	4G:62, 5G:25, 6G:5, 7G:3, 8G:1
Cnidaria	Anthozoa	Actiniaria	Actiniidae	Bolocera	Bolocera tuediae	HG423145.1	19143	4A:89, 5A:24, 6A:7, 7A:3, 8A:1, 9A:1	4T:150, 5T:61, 6T:19, 7T:11, 8T:5, 11T:1	4C:42, 5C:19, 6C:4, 7C:1, 8C:1	4G:59, 5G:24, 6G:4, 7G:1, 8G:1
Cnidaria	Anthozoa	Actiniaria	Hormathiidae	Hormathia	Hormathia digitata	HG423146.1	18754	4A:75, 5A:35, 6A:10, 7A:2, 8A:2	4T:150, 5T:69, 6T:25, 7T:11, 8T:5	4C:31, 5C:15, 6C:2, 8C:1	4G:63, 5G:18, 6G:1, 7G:2
Chordata	Actinopteri	Scombriformes	Icosteidae	Icosteus	Icosteus aenigmaticus	AP006026.1	16017	4A:57, 5A:16, 6A:2, 7A:1	4T:40, 5T:17, 6T:3, 7T:1	4C:83, 5C:40, 6C:8	4G:23, 5G:15, 6G:1
Chordata	Actinopteri	Kurtiformes	Kurtidae	Kurtus	Kurtus gulliveri	AP006030.1	16661	4A:73, 5A:40, 6A:10, 7A:3, 8A:1	4T:51, 5T:10, 6T:3, 7T:1	4C:88, 5C:28, 6C:11, 7C:1	4G:6, 5G:4
Chordata	Actinopteri	Scombriformes	Scombridae	Gasterochisma	Gasterochisma melampus	AP006033.1	16510	4A:62, 5A:12, 6A:4	4T:35, 5T:9, 6T:1, 7T:1	4C:84, 5C:50, 6C:9	4G:26, 5G:11
Chordata	Actinopteri	Istiophoriformes	Xiphiidae	Xiphias	Xiphias gladius	AP006036.1	16520	4A:58, 5A:18, 6A:5	4T:34, 5T:12, 6T:3, 7T:1	4C:86, 5C:41, 6C:14	4G:17, 5G:7, 6G:2
Chordata	Actinopteri	Anabantiformes	Channidae	Parachanna	Parachanna insignis	AP006042.1	16607	4A:77, 5A:28, 6A:6, 7A:1, 8A:1	4T:47, 5T:16, 6T:4, 9T:1	4C:109, 5C:35, 6C:16	4G:19, 5G:7, 6G:1
Chordata	Actinopteri	Perciformes	Platycephalidae	Platycephalus	Platycephalus indicus	AP006783.1	16542	4A:55, 5A:21, 6A:6, 7A:1	4T:44, 5T:12, 6T:4, 7T:1, 11T:1	4C:98, 5C:43, 6C:15, 7C:2	4G:18, 5G:8, 6G:3, 7G:1
Chordata	Actinopteri	Scombriformes	Chiasmodontidae	Dysalotus	Dysalotus alcocki	AP006814.1	16460	4A:55, 5A:14, 6A:4	4T:62, 5T:11, 6T:3, 11T:1	4C:72, 5C:26, 6C:13, 7C:2	4G:33, 5G:22
Chordata	Actinopteri	Scombriformes	Bramidae	Eumegistus	Eumegistus illustris	AP012497.1	16711	4A:71, 5A:27, 6A:8	4T:47, 5T:20, 6T:2, 7T:2, 8T:1, 13T:1	4C:89, 5C:73, 6C:14	4G:25, 5G:6
Chordata	Actinopteri	Scombriformes	Bramidae	Taractes	Taractes asper	AP012498.1	16720	4A:70, 5A:22, 6A:10, 7A:1	4T:44, 5T:19, 6T:1, 7T:2, 8T:1, 14T:1	4C:108, 5C:70, 6C:10	4G:27, 5G:10
Chordata	Actinopteri	Scombriformes	Bramidae	Pteraclis	Pteraclis aesticola	AP012499.1	16809	4A:67, 5A:23, 6A:4, 7A:1, 8A:2	4T:81, 5T:22, 6T:13, 7T:1, 8T:1, 24T:1	4C:81, 5C:27, 6C:4, 8C:2	4G:16, 5G:12
Chordata	Actinopteri	Scombriformes	Chiasmodontidae	Kali	Kali indica	AP012500.1	16627	4A:57, 5A:15, 6A:1, 7A:1	4T:72, 5T:18, 6T:7, 7T:3	4C:66, 5C:25, 6C:9, 7C:2	4G:24, 5G:10
Chordata	Actinopteri	Scombriformes	Gempylidae	Gempylus	Gempylus serpens	AP012502.1	16182	4A:55, 5A:25, 6A:4	4T:41, 5T:16, 6T:2, 7T:1, 11T:1	4C:76, 5C:36, 6C:16	4G:29, 5G:16, 6G:2
Chordata	Actinopteri	Scombriformes	Gempylidae	Nesiarchus	Nesiarchus nasutus	AP012503.1	16703	4A:58, 5A:23, 6A:7, 7A:1	4T:41, 5T:6, 6T:1, 7T:2, 10T:1	4C:80, 5C:36, 6C:15, 7C:1	4G:23, 5G:12, 6G:3
Chordata	Actinopteri	Scombriformes	Gempylidae	Promethichthys	Promethichthys prometheus	AP012504.1	16810	4A:73, 5A:17, 6A:5, 7A:1, 8A:1	4T:43, 5T:18, 6T:3, 11T:1	4C:82, 5C:52, 6C:10, 7C:2, 10C:1, 12C:1	4G:32, 5G:13, 6G:5
Chordata	Actinopteri	Scombriformes	Gempylidae	Thyrsitoides	Thyrsitoides marleyi	AP012505.1	16138	4A:74, 5A:26, 6A:5, 7A:1	4T:45, 5T:21, 6T:3, 7T:2, 10T:1	4C:84, 5C:52, 6C:14, 8C:1	4G:20, 5G:5, 6G:1, 7G:1
Chordata	Actinopteri	Scombriformes	Gempylidae	Ruvettus	Ruvettus pretiosus	AP012506.1	16202	4A:58, 5A:20, 6A:5	4T:43, 5T:16, 6T:2, 10T:1	4C:99, 5C:43, 6C:10	4G:21, 5G:6
Chordata	Actinopteri	Scombriformes	Trichiuridae	Trichiurus	Trichiurus japonicus	AP012507.1	16796	4A:69, 5A:27, 6A:8, 7A:1, 8A:2	4T:52, 5T:14, 6T:2, 7T:1, 8T:1	4C:87, 5C:50, 6C:16, 7C:2	4G:25, 5G:9, 6G:5
Chordata	Actinopteri	Scombriformes	Trichiuridae	Assurger	Assurger anzac	AP012508.1	16510	4A:73, 5A:22, 6A:6, 7A:2, 8A:1	4T:47, 5T:10, 6T:2, 8T:1	4C:90, 5C:58, 6C:20, 7C:6, 8C:2, 9C:2, 10C:1	4G:31, 5G:17, 6G:1, 7G:1, 8G:1
Chordata	Actinopteri	Scombriformes	Trichiuridae	Evoxymetopon	Evoxymetopon poeyi	AP012509.1	16475	4A:71, 5A:25, 6A:10, 7A:3	4T:57, 5T:11, 6T:7, 7T:1	4C:79, 5C:68, 6C:14, 7C:9, 8C:1, 10C:1, 13C:1	4G:24, 5G:15, 6G:3
Chordata	Actinopteri	Scombriformes	Scombridae	Gymnosarda	Gymnosarda unicolor	AP012510.1	16510	4A:67, 5A:19, 6A:5, 7A:1	4T:35, 5T:13, 6T:2	4C:99, 5C:37, 6C:15	4G:23, 5G:8, 6G:1
Chordata	Actinopteri	Scombriformes	Centrolophidae	Icichthys	Icichthys lockingtoni	AP012511.1	16191	4A:55, 5A:22, 6A:6, 7A:2	4T:52, 5T:14, 6T:2	4C:64, 5C:47, 6C:11, 7C:1, 9C:1	4G:27, 5G:8, 6G:1
Chordata	Actinopteri	Scombriformes	Ariommatidae	Ariomma	Ariomma indica	AP012513.1	16537	4A:70, 5A:22, 6A:8, 7A:1	4T:64, 5T:14, 6T:2, 7T:1	4C:77, 5C:24, 6C:11	4G:20, 5G:4, 6G:1
Chordata	Actinopteri	Scombriformes	Tetragonuridae	Tetragonurus	Tetragonurus atlanticus	AP012515.1	16476	4A:59, 5A:18, 6A:4, 7A:2	4T:56, 5T:14, 6T:6, 7T:1	4C:79, 5C:27, 6C:10	4G:19, 5G:9
Chordata	Actinopteri	Scombriformes	Stromateidae	Pampus	Pampus punctatissimus	AP012516.1	16553	4A:72, 5A:23, 6A:8, 7A:4, 8A:1	4T:58, 5T:16, 6T:4, 7T:1	4C:67, 5C:33, 6C:12	4G:22, 5G:9, 6G:1
Chordata	Actinopteri	Scombriformes	Scombrolabracidae	Scombrolabrax	Scombrolabrax heterolepis	AP012517.1	16412	4A:61, 5A:16, 6A:4	4T:41, 5T:14, 6T:2, 12T:1	4C:97, 5C:43, 6C:13, 7C:2	4G:31, 5G:9, 6G:1
Chordata	Actinopteri	Scombriformes	Gempylidae	Lepidocybium	Lepidocybium flavobrunneum	AP012519.1	16759	4A:76, 5A:23, 6A:7, 7A:1	4T:41, 5T:7, 6T:3, 7T:1	4C:81, 5C:59, 6C:9, 7C:2, 10C:1	4G:28, 5G:9
Chordata	Actinopteri	Scombriformes	Gempylidae	Rexea	Rexea nakamurai	AP012520.1	16382	4A:73, 5A:20, 6A:7, 7A:2	4T:54, 5T:15, 6T:3	4C:83, 5C:54, 6C:14, 7C:2	4G:31, 5G:11, 6G:1
Chordata	Actinopteri	Scombriformes	Gempylidae	Nealotus	Nealotus tripes	AP012521.1	16197	4A:57, 5A:19, 6A:5, 7A:1	4T:37, 5T:12, 6T:2	4C:88, 5C:41, 6C:6	4G:25, 5G:7, 6G:2, 7G:1
Chordata	Actinopteri	Scombriformes	Trichiuridae	Benthodesmus	Benthodesmus tenuis	AP012522.1	16864	4A:72, 5A:22, 6A:6, 7A:1	4T:40, 5T:15, 6T:3, 8T:1	4C:83, 5C:60, 6C:21, 7C:5, 8C:3, 11C:1	4G:28, 5G:8, 6G:3, 7G:1
Chordata	Actinopteri	Scombriformes	Gempylidae	Epinnula	Epinnula magistralis	AP012943.1	16545	4A:57, 5A:22, 6A:8	4T:42, 5T:11, 6T:2, 13T:1	4C:91, 5C:47, 6C:10, 7C:2	4G:32, 5G:12
Chordata	Actinopteri	Scombriformes	Trichiuridae	Aphanopus	Aphanopus carbo	AP012944.1	16406	4A:70, 5A:21, 6A:8, 7A:1	4T:46, 5T:18, 6T:1, 7T:1	4C:100, 5C:58, 6C:12, 7C:2, 8C:1	4G:41, 5G:12, 6G:1
Chordata	Actinopteri	Carangiformes	Echeneidae	Echeneis	Echeneis naucrates	AB355905.1	16612	4A:80, 5A:28, 6A:6, 7A:1	4T:69, 5T:18, 6T:10, 7T:3	4C:46, 5C:29, 6C:7	4G:11, 5G:6, 6G:1
Chordata	Actinopteri	Carangiformes	Rachycentridae	Rachycentron	Rachycentron canadum	AB355906.1	16030	4A:79, 5A:21, 6A:5, 7A:3, 8A:1	4T:62, 5T:20, 6T:5, 7T:2	4C:64, 5C:31, 6C:9, 7C:1	4G:17, 5G:5, 6G:3
Chordata	Actinopteri	Carangiformes	Coryphaenidae	Coryphaena	Coryphaena hippurus	AB355908.1	15912	4A:57, 5A:19, 6A:8, 7A:2, 8A:1	4T:57, 5T:18, 6T:8, 7T:1	4C:60, 5C:13, 6C:8	4G:27, 5G:10, 6G:2
Chordata	Actinopteri	Kurtiformes	Apogonidae	Apogon	Apogon semilineatus	AP005996.1	16508	4A:48, 5A:19, 6A:2, 7A:1	4T:57, 5T:9, 6T:3, 7T:2, 10T:1	4C:78, 5C:38, 6C:12	4G:23, 5G:15, 6G:1
Chordata	Actinopteri	Kurtiformes	Apogonidae	Pterapogon	Pterapogon kauderni	AP005997.1	16530	4A:68, 5A:25, 6A:7, 7A:1, 9A:1	4T:52, 5T:24, 6T:6, 7T:4	4C:82, 5C:44, 6C:14	4G:18, 5G:6, 6G:2
Chordata	Actinopteri	Scombriformes	Bramidae	Brama	Brama japonica	AP005998.1	17011	4A:68, 5A:14, 6A:11, 7A:2, 8A:1, 10A:1, 11A:1	4T:42, 5T:15, 6T:5, 7T:1	4C:93, 5C:64, 6C:13, 8C:1, 11C:1, 13C:1, 14C:1	4G:30, 5G:26, 6G:1, 9G:1, 16G:1
Chordata	Actinopteri	Centrarchiformes	Cirrhitidae	Paracirrhites	Paracirrhites arcatus	AP006012.1	17336	4A:65, 5A:35, 6A:7, 7A:3, 8A:1	4T:58, 5T:22, 6T:7, 7T:4, 8T:1	4C:81, 5C:36, 6C:10, 7C:2, 9C:2, 11C:2	4G:25, 5G:4
Chordata	Mammalia	Chiroptera	Phyllostomidae	Micronycteris	Micronycteris megalotis	HF947304.1	16589	4A:63, 5A:34, 6A:5, 7A:1, 8A:2	4T:27, 5T:6, 6T:1	4C:68, 5C:23, 6C:5, 7C:2	4G:8, 5G:5
Chordata	Mammalia	Chiroptera	Phyllostomidae	Anoura	Anoura caudifer	HG003307.1	16546	4A:79, 5A:30, 6A:10, 7A:2, 8A:1	4T:49, 5T:14, 6T:5, 7T:1	4C:59, 5C:24, 6C:8, 10C:1	4G:10, 5G:4
Chordata	Mammalia	Chiroptera	Phyllostomidae	Brachyphylla	Brachyphylla cavernarum	HG003308.1	16785	4A:80, 5A:28, 6A:7, 7A:2, 8A:1, 10A:1	4T:42, 5T:8, 6T:1	4C:56, 5C:32, 6C:7, 7C:1	4G:18, 5G:7
Chordata	Mammalia	Chiroptera	Phyllostomidae	Carollia	Carollia perspicillata	HG003309.1	16711	4A:69, 5A:26, 6A:5, 7A:3, 9A:1	4T:35, 5T:13, 6T:1	4C:59, 5C:34, 6C:6	4G:9, 5G:2
Chordata	Mammalia	Chiroptera	Phyllostomidae	Desmodus	Desmodus rotundus	HG003310.1	16659	4A:53, 5A:31, 6A:5, 7A:2, 8A:1	4T:13, 5T:12, 6T:2	4C:99, 5C:39, 6C:11, 7C:3, 8C:1	4G:21, 5G:9, 6G:2
Chordata	Mammalia	Chiroptera	Mormoopidae	Pteronotus	Pteronotus rubiginosus	HG003312.1	16616	4A:76, 5A:37, 6A:8, 7A:3, 8A:1, 9A:1	4T:31, 5T:9, 6T:1	4C:49, 5C:20, 6C:7	4G:9, 5G:2
Chordata	Mammalia	Chiroptera	Phyllostomidae	Rhinophylla	Rhinophylla pumilio	HG003313.1	16671	4A:77, 5A:26, 6A:8, 7A:3	4T:54, 5T:15, 6T:5, 7T:1	4C:48, 5C:21, 6C:4	4G:8, 5G:3, 7G:1
Chordata	Mammalia	Chiroptera	Phyllostomidae	Sturnira	Sturnira tildae	HG003314.1	16637	4A:89, 5A:31, 6A:7, 7A:2, 8A:1	4T:27, 5T:6, 6T:1, 8T:1	4C:83, 5C:35, 6C:7, 8C:1	4G:9, 5G:6
Chordata	Mammalia	Chiroptera	Phyllostomidae	Tonatia	Tonatia saurophila	HG003315.1	16629	4A:78, 5A:35, 6A:5, 7A:3, 8A:1	4T:35, 5T:5, 6T:4, 7T:1, 9T:1	4C:67, 5C:11, 6C:4, 7C:1	4G:4, 5G:3
Chordata	Mammalia	Chiroptera	Phyllostomidae	Vampyrum	Vampyrum spectrum	HG003316.1	16637	4A:72, 5A:24, 6A:6, 7A:1, 8A:1	4T:27, 5T:6, 6T:2	4C:103, 5C:37, 6C:8, 9C:1	4G:16, 5G:6
Chordata	Lepidosauria	Squamata	Colubridae	Sibynophis	Sibynophis chinensis	NC_022430.1	17163	4A:90, 5A:36, 6A:9, 7A:9, 8A:2, 9A:2	4T:56, 5T:21, 6T:5, 7T:1, 8T:2	4C:55, 5C:11, 6C:4, 7C:3, 8C:1, 9C:3	4G:19, 5G:5, 6G:2, 7G:1
Platyhelminthes	Trematoda	Opisthorchiida	Heterophyidae	Haplorchis	Haplorchis taichui	NC_022433.1	15130	4A:27, 5A:10, 6A:4, 7A:1	4T:168, 5T:77, 6T:33, 7T:15, 8T:10, 9T:2, 10T:1, 16T:1	4C:13, 5C:3, 6C:1, 7C:1, 8C:4, 9C:3	4G:77, 5G:40, 6G:11, 7G:9, 8G:5, 9G:2, 10G:1
Platyhelminthes	Rhabditophora	Tricladida	Dugesiidae	Schmidtea	Schmidtea mediterranea	NC_022448.1	27133	4A:69, 5A:17, 6A:7, 7A:1, 13A:1, 18A:2	4T:392, 5T:153, 6T:69, 7T:35, 8T:19, 9T:5, 10T:2, 11T:1, 12T:2, 17T:3, 18T:3, 19T:1, 20T:1, 21T:1, 22T:1	4C:1	4G:16, 5G:3
Arthropoda	Insecta	Hemiptera	Tessaratomidae	Eusthenes	Eusthenes cupreus	NC_022449.1	16229	4A:144, 5A:63, 6A:26, 7A:7, 8A:1	4T:65, 5T:23, 6T:8, 8T:1	4C:18, 5C:7, 6C:1	4G:13, 5G:3, 6G:1
Porifera	Demospongiae	Suberitida	Halichondriidae	Hymeniacidon	Hymeniacidon sinapium	NC_022450.1	23435	4A:114, 5A:33, 6A:13, 7A:2, 8A:2	4T:201, 5T:63, 6T:24, 7T:12, 8T:4	4C:12, 5C:3, 6C:1	4G:73, 5G:34, 6G:10, 7G:1
Arthropoda	Insecta	Hemiptera	Aradidae	Brachyrhynchus	Brachyrhynchus hsiaoi	NC_022670.1	15250	4A:117, 5A:55, 6A:15, 7A:7, 8A:2, 10A:1	4T:52, 5T:9, 6T:2	4C:27, 5C:6, 6C:2	4G:14, 5G:2, 6G:1, 10G:1
Arthropoda	Insecta	Hemiptera	Miridae	Nesidiocoris	Nesidiocoris tenuis	NC_022677.1	17544	4A:172, 5A:92, 6A:28, 7A:20, 8A:7, 9A:1, 10A:1	4T:92, 5T:44, 6T:18, 7T:7, 8T:2	4C:19, 5C:3, 6C:3, 10C:1	4G:17, 5G:4, 6G:2, 8G:1
Chordata	Actinopteri	Cypriniformes	Xenocyprididae	Parabramis	Parabramis pekinensis	NC_022678.1	16622	4A:77, 5A:29, 6A:8, 7A:2	4T:40, 5T:9, 6T:1, 7T:1	4C:57, 5C:32, 6C:8, 7C:1	4G:18, 5G:7
Arthropoda	Insecta	Coleoptera	Curculionidae	Hylobitelus	Hylobitelus xiaoi	NC_022680.1	16123	4A:157, 5A:71, 6A:31, 7A:17, 8A:13, 9A:3, 10A:1, 12A:1, 17A:1	4T:124, 5T:55, 6T:29, 7T:7, 8T:5, 9T:1, 14T:1	4C:22, 5C:5, 6C:2, 9C:1	4G:4
Chordata	Aves	Galliformes	Phasianidae	Arborophila	Arborophila ardens	NC_022683.1	16728	4A:79, 5A:23, 6A:6, 7A:3, 8A:1	4T:34, 5T:13, 6T:2, 7T:1, 8T:1, 9T:2	4C:92, 5C:31, 6C:14, 7C:5, 11C:1	4G:11, 5G:4, 7G:1
Arthropoda	Insecta	Lepidoptera	Pieridae	Leptidea	Leptidea morsei	NC_022686.1	15122	4A:138, 5A:54, 6A:20, 7A:6, 8A:2, 10A:1, 11A:1	4T:169, 5T:60, 6T:37, 7T:16, 8T:11, 9T:3, 10T:2, 19T:1	4C:20, 5C:11, 6C:3	4G:6, 5G:1
Arthropoda	Insecta	Lepidoptera	Pieridae	Catopsilia	Catopsilia pomona	NC_022687.1	15142	4A:127, 5A:56, 6A:31, 7A:9, 8A:3, 10A:4, 11A:1	4T:164, 5T:58, 6T:32, 7T:18, 8T:12, 9T:4, 10T:2, 12T:1	4C:12, 5C:8, 6C:2	4G:1, 5G:2
Mollusca	Bivalvia	Venerida	Arcticidae	Arctica	Arctica islandica	NC_022709.1	18289	4A:90, 5A:43, 6A:14, 7A:1, 8A:1	4T:241, 5T:102, 6T:53, 7T:16, 8T:6, 9T:4, 10T:2	4C:9, 5C:2	4G:50, 5G:16, 6G:5, 9G:1
Arthropoda	Insecta	Siphonaptera	Ceratophyllidae	Jellisonia	Jellisonia amadoi	NC_022710.1	17031	4A:133, 5A:70, 6A:26, 7A:7, 8A:3, 9A:1, 10A:1	4T:163, 5T:82, 6T:24, 7T:12, 8T:4, 9T:2, 10T:1, 11T:1	4C:24, 5C:5, 6C:1	4G:7, 5G:4
Arthropoda	Thecostraca	Balanomorpha	Chthamalidae	Notochthamalus	Notochthamalus scabrosus	NC_022716.1	15397	4A:113, 5A:40, 6A:15, 7A:10, 8A:4, 9A:1	4T:117, 5T:46, 6T:17, 7T:1, 8T:3	4C:31, 5C:8, 6C:1	4G:9, 5G:1
Chordata	Actinopteri	Cypriniformes	Cyprinidae	Oxygymnocypris	Oxygymnocypris stewartii	NC_022718.1	16646	4A:59, 5A:17, 6A:5, 7A:1	4T:51, 5T:15, 6T:7, 8T:1	4C:60, 5C:32, 6C:9	4G:33, 5G:9, 6G:3, 7G:1
Chordata	Actinopteri	Characiformes	Acestrorhamphidae	Hasemania	Hasemania nana	NC_022724.1	16581	4A:66, 5A:36, 6A:9, 7A:1	4T:76, 5T:22, 6T:4, 9T:1	4C:68, 5C:17, 6C:4	4G:12, 5G:5, 6G:1
Arthropoda	Insecta	Hemiptera	Aphididae	Diuraphis	Diuraphis noxia	NC_022727.1	15784	4A:197, 5A:91, 6A:39, 7A:22, 8A:22, 9A:7, 10A:5, 11A:5, 12A:2, 24A:1, 25A:1, 30A:1	4T:154, 5T:81, 6T:32, 7T:15, 8T:3, 9T:1, 10T:3	4C:3, 6C:2	4G:1
Chordata	Chondrichthyes	Hexanchiformes	Chlamydoselachidae	Chlamydoselachus	Chlamydoselachus anguineus	NC_022729.1	17314	4A:91, 5A:41, 6A:9, 7A:5, 8A:1	4T:103, 5T:33, 6T:6, 7T:5, 8T:1, 10T:1, 13T:1	4C:44, 5C:13, 6C:2, 7C:1	4G:6, 5G:6
Chordata	Chondrichthyes	Hexanchiformes	Hexanchidae	Heptranchias	Heptranchias perlo	NC_022730.1	18909	4A:116, 5A:64, 6A:11, 7A:10, 8A:3	4T:84, 5T:44, 6T:8, 7T:6, 8T:1, 10T:1	4C:51, 5C:8, 6C:2, 7C:1	4G:4, 5G:3
Chordata	Chondrichthyes	Hexanchiformes	Hexanchidae	Notorynchus	Notorynchus cepedianus	NC_022731.1	16990	4A:87, 5A:46, 6A:12, 7A:4, 8A:2	4T:65, 5T:23, 6T:8, 7T:1, 8T:1, 10T:1	4C:55, 5C:15, 6C:6, 7C:1	4G:6, 5G:3, 8G:1
Chordata	Chondrichthyes	Hexanchiformes	Hexanchidae	Hexanchus	Hexanchus nakamurai	NC_022733.1	18605	4A:89, 5A:81, 6A:9, 7A:6, 8A:2, 9A:1	4T:85, 5T:63, 6T:8, 7T:5, 10T:1	4C:48, 5C:15, 6C:2, 7C:2	4G:2, 5G:2
Chordata	Chondrichthyes	Squaliformes	Somniosidae	Somniosus	Somniosus pacificus	NC_022734.1	16730	4A:72, 5A:41, 6A:5, 7A:5, 8A:2	4T:92, 5T:19, 6T:8, 7T:5, 8T:1, 10T:1	4C:50, 5C:18, 6C:6, 7C:4	4G:13, 5G:5, 6G:1, 7G:1
Chordata	Chondrichthyes	Carcharhiniformes	Pseudotriakidae	Pseudotriakis	Pseudotriakis microdon	NC_022735.1	16700	4A:84, 5A:40, 6A:8, 7A:4, 8A:1, 10A:1	4T:98, 5T:39, 6T:10, 7T:10, 9T:1, 10T:1	4C:46, 5C:10, 6C:5, 7C:3	4G:12, 5G:4
Arthropoda	Malacostraca	Decapoda	Palinuridae	Sagmariasus	Sagmariasus verreauxi	NC_022736.1	15470	4A:83, 5A:38, 6A:20, 7A:4, 8A:1	4T:104, 5T:47, 6T:8, 7T:7, 8T:5	4C:33, 5C:12, 6C:3, 7C:1, 11C:1	4G:17, 5G:1, 7G:1
Arthropoda	Insecta	Hymenoptera	Braconidae	Therophilus	Therophilus festivus	KF385868.1	14216	4A:151, 5A:66, 6A:30, 7A:18, 8A:5, 9A:2, 11A:2, 12A:1	4T:173, 5T:83, 6T:36, 7T:19, 8T:8, 9T:6, 10T:2, 12T:2, 16T:1	4C:1	4G:1, 5G:1
Arthropoda	Insecta	Hymenoptera	Braconidae	Cardiochiles	Cardiochiles fuscipennis	KF385870.1	14390	4A:138, 5A:51, 6A:32, 7A:10, 8A:5, 9A:2, 10A:1, 11A:2, 13A:1	4T:196, 5T:91, 6T:38, 7T:18, 8T:12, 9T:9, 10T:4, 11T:1, 12T:2, 17T:1	4C:2	4G:18, 5G:1, 7G:1, 8G:1
Arthropoda	Insecta	Hymenoptera	Braconidae	Ichneutes	Ichneutes sp.	KF385874.1	13092	4A:103, 5A:43, 6A:23, 7A:13, 8A:7, 9A:3, 10A:1, 11A:1	4T:179, 5T:68, 6T:35, 7T:10, 8T:7, 9T:3, 10T:2	4C:2, 5C:2	4G:21, 5G:3, 6G:2
Arthropoda	Insecta	Hemiptera	Reduviidae	Oncocephalus	Oncocephalus breviscutum	NC_022816.1	15948	4A:157, 5A:67, 6A:35, 7A:24, 8A:11	4T:91, 5T:29, 6T:12	4C:16, 5C:4, 7C:1	4G:5, 6G:1, 12G:1
Chordata	Actinopteri	Osteoglossiformes	Osteoglossidae	Scleropages	Scleropages jardinii	NC_022836.1	16670	4A:73, 5A:27, 6A:6, 7A:1, 8A:1	4T:32, 5T:13, 6T:1	4C:84, 5C:30, 6C:10, 7C:1	4G:21, 5G:6
Chordata	Actinopteri	Gobiiformes	Gobiidae	Sicyopterus	Sicyopterus lagocephalus	NC_022838.1	16500	4A:77, 5A:24, 6A:7, 7A:2	4T:48, 5T:17, 6T:1, 7T:1	4C:78, 5C:39, 6C:19, 7C:1	4G:17, 5G:11, 6G:3
Chordata	Chondrichthyes	Rhinopristiformes	Rhinobatidae	Rhinobatos	Rhinobatos hynnicephalus	NC_022841.1	16776	4A:88, 5A:46, 6A:8, 7A:3, 11A:1	4T:59, 5T:17, 6T:4, 7T:1, 8T:1	4C:56, 5C:26, 6C:9, 7C:3	4G:6, 5G:2, 6G:1, 8G:1
Arthropoda	Insecta	Hymenoptera	Aulacidae	Pristaulacus	Pristaulacus compressus	NC_022849.1	15563	4A:129, 5A:65, 6A:29, 7A:12, 8A:4, 9A:2, 10A:2, 11A:1	4T:212, 5T:110, 6T:50, 7T:19, 8T:10, 9T:6, 10T:5, 11T:3, 14T:1, 15T:1, 16T:1	4C:20, 5C:6	5G:1
Arthropoda	Insecta	Lepidoptera	Hesperiidae	Celaenorrhinus	Celaenorrhinus maculosa	NC_022853.1	15282	4A:135, 5A:52, 6A:30, 7A:12, 9A:5, 10A:1, 11A:3	4T:155, 5T:76, 6T:30, 7T:13, 8T:5, 9T:1, 10T:2, 18T:1	4C:16, 5C:17, 6C:3	4G:2, 5G:4
Chordata	Actinopteri	Cypriniformes	Cyprinidae	Aspiorhynchus	Aspiorhynchus laticeps	NC_022855.1	16591	4A:89, 5A:19, 6A:5, 7A:1	4T:45, 5T:14, 6T:2, 7T:1	4C:57, 5C:29, 6C:7	4G:23, 5G:11, 6G:6
Chordata	Actinopteri	Cypriniformes	Cyprinidae	Pethia	Pethia conchonius	NC_022856.1	17082	4A:94, 5A:34, 6A:6, 7A:2	4T:62, 5T:14, 6T:4	4C:52, 5C:22, 6C:6, 8C:1	4G:26, 5G:8, 6G:3
Cnidaria	Anthozoa	Scleralcyonacea	Coralliidae	Corallium	Corallium rubrum	NC_022864.1	18915	4A:73, 5A:13, 6A:7	4T:84, 5T:29, 6T:8, 8T:1	4C:48, 5C:17, 6C:3	4G:43, 5G:19, 6G:3, 7G:2
Chordata	Actinopteri	Cypriniformes	Cyprinidae	Discogobio	Discogobio sp.	AP012151.1	16594	4A:83, 5A:31, 6A:6, 7A:2, 8A:1	4T:58, 5T:10, 6T:2, 7T:1	4C:59, 5C:26, 6C:11	4G:20, 5G:7, 6G:1
Chordata	Aves	Accipitriformes	Accipitridae	Aegypius	Aegypius monachus	KF682364.1	17811	4A:75, 5A:25, 6A:3, 7A:2, 9A:1	4T:37, 5T:10, 7T:2, 8T:6, 11T:1	4C:72, 5C:36, 6C:13, 7C:1, 8C:1	4G:15, 5G:7, 6G:2
Chordata	Actinopteri	Osteoglossiformes	Mormyridae	Campylomormyrus	Campylomormyrus compressirostris	HG779437.1	16715	4A:79, 5A:29, 6A:10, 7A:1, 9A:1	4T:28, 5T:8, 6T:1, 10T:1	4C:63, 5C:25, 6C:8, 7C:3, 10C:1	4G:19, 5G:5, 6G:1
Arthropoda	Malacostraca	Isopoda	Limnoriidae	Limnoria	Limnoria quadripunctata	KF704000.1	16515	4A:102, 5A:32, 6A:12, 7A:5, 8A:3	4T:195, 5T:68, 6T:23, 7T:11, 8T:7, 9T:2, 10T:1	4C:12, 5C:3, 6C:5	4G:57, 5G:18, 6G:8, 7G:2, 8G:1, 10G:1
Arthropoda	Insecta	Hymenoptera	Scelionidae	Idris	Idris sp.	KF696670.1	15137	4A:171, 5A:80, 6A:29, 7A:24, 8A:6, 9A:3, 10A:1, 11A:1, 12A:2, 14A:2	4T:177, 5T:65, 6T:23, 7T:10, 8T:11, 9T:3	4C:22, 5C:5, 6C:4, 8C:1, 9C:1	4G:3
Acanthocephala	Eoacanthocephala	Gyracanthocephala	Quadrigyridae	Pallisentis	Pallisentis celatus	NC_022921.1	13855	4A:24, 5A:10, 6A:4, 9A:1	4T:199, 5T:62, 6T:36, 7T:17, 8T:9, 9T:2	4C:6, 5C:3, 6C:1, 11C:1	4G:98, 5G:39, 6G:15
Arthropoda	Insecta	Coleoptera	Chrysomelidae	Diabrotica	Diabrotica barberi	NC_022935.1	16366	4A:156, 5A:84, 6A:35, 7A:19, 8A:11, 9A:4, 10A:2, 11A:2	4T:169, 5T:70, 6T:27, 7T:5, 8T:7, 9T:5, 10T:1, 18T:1	4C:15, 5C:14	4G:6, 5G:4
Arthropoda	Hexanauplia	Harpacticoida	Miraciidae	Schizopera	Schizopera knabeni	KF667527.1	10649	4A:62, 5A:21, 6A:4, 7A:3, 8A:1	4T:56, 5T:17, 6T:14, 7T:6, 8T:2, 9T:2	4C:15, 5C:5, 6C:4	4G:28, 5G:10, 6G:1, 7G:1
Acanthocephala	Eoacanthocephala	Neoechinorhynchida	Neoechinorhynchidae	Hebesoma	Hebesoma violentum	KC415004.1	13393	4A:24, 5A:7, 6A:4, 7A:2, 10A:1	4T:136, 5T:46, 6T:22, 7T:5, 8T:1, 9T:1	4C:14, 5C:6	4G:87, 5G:37, 6G:13, 7G:2, 8G:1
Chordata	Actinopteri	Scombriformes	Centrolophidae	Hyperoglyphe	Hyperoglyphe japonica	AB752307.1	16575	4A:63, 5A:20, 6A:5, 7A:4	4T:57, 5T:15, 7T:1	4C:84, 5C:52, 6C:11, 7C:1, 10C:1	4G:24, 5G:9, 6G:1
Arthropoda	Insecta	Hemiptera	Miridae	Apolygus	Apolygus lucorum	NC_023083.1	14768	4A:156, 5A:71, 6A:31, 7A:30, 8A:9, 9A:1	4T:88, 5T:30, 6T:19, 7T:5, 8T:1	4C:18, 5C:2, 6C:2	4G:10, 5G:2, 10G:1
Arthropoda	Insecta	Hymenoptera	Formicidae	Leptomyrmex	Leptomyrmex pallens	NC_023093.1	15591	4A:131, 5A:57, 6A:23, 7A:12, 8A:5, 9A:4, 10A:1, 12A:1	4T:102, 5T:33, 6T:12, 7T:3, 8T:1	4C:82, 5C:29, 6C:9, 7C:4, 9C:1	4G:13, 5G:4, 6G:1, 7G:2, 8G:1, 9G:1
Platyhelminthes	Trematoda	Plagiorchiida	Paramphistomidae	Paramphistomum	Paramphistomum cervi	NC_023095.1	14014	4A:18, 5A:8	4T:172, 5T:78, 6T:44, 7T:21, 8T:9, 9T:3	4C:5, 5C:1, 6C:1	4G:40, 5G:15, 6G:4, 7G:2
Nematoda	Chromadorea	Rhabditida	Strongylidae	Hypodontus	Hypodontus macropi	NC_023098.1	13634	4A:57, 5A:27, 6A:8, 7A:3, 8A:3	4T:222, 5T:98, 6T:55, 7T:30, 8T:15, 9T:9, 10T:1	4C:4, 5C:1	4G:27, 5G:5, 6G:3
Nematoda	Chromadorea	Rhabditida	Strongylidae	Macropicola	Macropicola ocydromi	NC_023099.1	13659	4A:59, 5A:32, 6A:9, 7A:2, 8A:2	4T:218, 5T:96, 6T:51, 7T:27, 8T:11, 9T:5, 10T:1	4C:2, 5C:1	4G:18, 5G:6
Chordata	Actinopteri	Characiformes	Acestrorhamphidae	Paracheirodon	Paracheirodon axelrodi	AB898197.1	17100	4A:91, 5A:35, 6A:7, 7A:5	4T:83, 5T:35, 6T:9, 7T:4, 8T:3, 14T:1	4C:70, 5C:20, 6C:9, 9C:2	4G:18, 5G:11, 6G:2, 7G:2
Arthropoda	Insecta	Lepidoptera	Carposinidae	Carposina	Carposina sasakii	NC_023212.1	15611	4A:159, 5A:63, 6A:28, 7A:13, 8A:8, 9A:5, 10A:2, 11A:1, 12A:2, 13A:1, 15A:1	4T:148, 5T:60, 6T:27, 7T:9, 8T:6, 9T:2, 10T:1, 11T:2, 19T:2	4C:5, 5C:10, 6C:2	4G:11, 5G:2
Arthropoda	Insecta	Odonata	Epiophlebiidae	Epiophlebia	Epiophlebia superstes	NC_023232.1	15435	4A:136, 5A:60, 6A:35, 7A:7, 8A:3, 9A:1	4T:95, 5T:31, 6T:7, 7T:2	4C:20, 5C:7, 6C:1, 7C:1	4G:16, 5G:4
Arthropoda	Insecta	Odonata	Calopterygidae	Vestalis	Vestalis melania	NC_023233.1	16685	4A:123, 5A:69, 6A:25, 7A:5, 8A:14, 9A:5, 10A:1	4T:45, 5T:22, 6T:3, 7T:1, 8T:1, 9T:1	4C:58, 5C:22, 6C:5, 7C:1, 9C:1	4G:16, 5G:15, 6G:5, 7G:4, 8G:1, 9G:1, 10G:1
Mollusca	Cephalopoda	Octopoda	Octopodidae	Cistopus	Cistopus taiwanicus	NC_023257.1	15793	4A:151, 5A:56, 6A:31, 7A:10, 8A:8, 9A:3, 10A:3	4T:121, 5T:32, 6T:17, 7T:3, 8T:3	4C:28, 5C:7, 6C:1
Nematoda	Chromadorea	Rhabditida	Metastrongylidae	Protostrongylus	Protostrongylus rufescens	NC_023262.1	13619	4A:45, 5A:17, 6A:6, 7A:4	4T:197, 5T:125, 6T:63, 7T:40, 8T:22, 9T:11, 10T:2, 12T:2, 13T:1	4C:1	4G:20, 5G:9, 6G:2
Chordata	Actinopteri	Cypriniformes	Gastromyzontidae	Plesiomyzon	Plesiomyzon baotingensis	NC_023267.1	16541	4A:72, 5A:27, 6A:5, 7A:3	4T:53, 5T:15, 6T:5, 9T:1	4C:77, 5C:38, 6C:10	4G:26, 5G:11, 6G:3
Arthropoda	Insecta	Trichoptera	Apataniidae	Apatania	Apatania sp.	KF756944.1	14218	4A:138, 5A:60, 6A:20, 7A:13, 8A:5, 10A:1	4T:135, 5T:70, 6T:25, 7T:11, 8T:8, 9T:1, 11T:1	4C:24, 5C:14, 6C:4, 7C:1	4G:6, 5G:7, 6G:1, 7G:1
Chordata	Amphibia	Anura	Hemisotidae	Hemisus	Hemisus marmoratus	AB777217.1	20093	4A:93, 5A:32, 6A:5, 7A:8, 11A:1	4T:125, 5T:26, 6T:10, 7T:6, 8T:18	4C:59, 5C:42, 6C:8, 8C:3, 9C:1, 10C:1	4G:19, 5G:4, 6G:2, 7G:1, 9G:1
Arthropoda	Arachnida	Ixodida	Argasidae	Antricola	Antricola mexicanus	NC_023340.1	14415	4A:141, 5A:50, 6A:33, 7A:9, 8A:7, 9A:2, 11A:1	4T:125, 5T:48, 6T:13, 7T:5, 8T:1, 9T:1	4C:15, 5C:9, 6C:1	4G:4, 5G:3
Chordata	Amphibia	Caudata	Proteidae	Necturus	Necturus beyeri	NC_023341.1	16284	4A:83, 5A:45, 6A:8, 7A:10, 8A:1	4T:115, 5T:36, 6T:15, 7T:4, 11T:1	4C:42, 5C:11, 6C:2, 7C:2	4G:13, 5G:1, 6G:2
Chordata	Amphibia	Caudata	Proteidae	Proteus	Proteus anguinus	NC_023342.1	16584	4A:73, 5A:37, 6A:13, 7A:6, 8A:2	4T:57, 5T:18, 6T:10, 7T:3, 8T:2, 10T:1	4C:54, 5C:28, 6C:12, 7C:1	4G:22, 5G:5, 13G:1
Cnidaria	Anthozoa	Malacalcyonacea	Nephtheidae	Scleronephthya	Scleronephthya gracillimum	NC_023344.1	18950	4A:70, 5A:19, 6A:3, 7A:1	4T:94, 5T:28, 6T:11, 7T:3	4C:41, 5C:13, 6C:2	4G:46, 5G:22, 6G:3, 7G:4, 8G:1
Cnidaria	Anthozoa	Malacalcyonacea	Acanthogorgiidae	Calicogorgia	Calicogorgia granulosa	NC_023345.1	20246	4A:65, 5A:21, 6A:6, 7A:1	4T:87, 5T:34, 6T:12, 7T:2	4C:39, 5C:11, 6C:3	4G:54, 5G:13, 6G:5, 7G:2
Chordata	Mammalia	Eulipotyphla	Soricidae	Nectogale	Nectogale elegans	NC_023351.1	17460	4A:94, 5A:37, 6A:6, 7A:3	4T:85, 5T:19, 6T:6, 7T:2	4C:47, 5C:13, 6C:3	4G:7, 5G:3, 7G:1
Arthropoda	Arachnida	Ixodida	Argasidae	Otobius	Otobius megnini	NC_023370.1	14430	4A:137, 5A:73, 6A:36, 7A:13, 8A:10, 9A:5, 10A:3, 11A:3, 12A:1, 13A:1	4T:142, 5T:68, 6T:21, 7T:14, 8T:9, 9T:3, 10T:1, 12T:1, 13T:1	4C:25, 5C:9, 6C:1, 9C:1	4G:1, 5G:2
Chordata	Amphibia	Anura	Brevicipitidae	Breviceps	Breviceps adspersus	NC_023379.1	28757	4A:128, 5A:49, 6A:8, 7A:8	4T:73, 5T:17, 6T:6, 7T:6, 8T:1, 10T:1, 12T:1	4C:129, 5C:53, 6C:26, 7C:16, 8C:10, 9C:4, 10C:2, 11C:1, 12C:2, 13C:2, 16C:1, 21C:1	4G:17, 5G:6, 6G:1, 7G:1, 10G:1
Echinodermata	Holothuroidea	Elasipodida	Elpidiidae	Peniagone	Peniagone sp.	KF915304.1	15507	4A:124, 5A:76, 6A:32, 7A:10, 8A:7, 9A:4, 11A:1	4T:158, 5T:80, 6T:38, 7T:6, 8T:6, 9T:2	4C:12, 5C:4	4G:12, 5G:2, 6G:2
Chordata	Actinopteri	Siluriformes	Bagridae	Sperata	Sperata seenghala	AB907556.1	16588	4A:83, 5A:24, 6A:5, 7A:3	4T:50, 5T:12, 6T:3, 7T:1, 8T:1	4C:62, 5C:28, 6C:15	4G:9, 5G:10, 7G:1
Arthropoda	Arachnida	Ricinulei	Ricinoididae	Cryptocellus	Cryptocellus narino	NC_023450.1	14554	4A:137, 5A:48, 6A:23, 7A:11, 8A:10, 9A:6, 10A:1, 12A:1, 13A:1, 19A:1	4T:49, 5T:11, 6T:3, 7T:1, 9T:1, 13T:1, 15T:1	4C:25, 5C:5, 6C:1, 9C:1, 11C:1	4G:2
Arthropoda	Arachnida	Ricinulei	Ricinoididae	Pseudocellus	Pseudocellus gertschi	NC_023451.1	14477	4A:120, 5A:60, 6A:21, 7A:9, 8A:4, 9A:3, 10A:4, 11A:5	4T:66, 5T:14, 6T:9, 7T:1, 10T:1	4C:20, 5C:7, 6C:3, 7C:1	4G:4, 5G:1
Arthropoda	Arachnida	Ricinulei	Ricinoididae	Ricinoides	Ricinoides karschii	NC_023452.1	14614	4A:100, 5A:41, 6A:23, 7A:9, 8A:2, 9A:3, 14A:1	4T:63, 5T:18, 6T:6, 7T:9, 8T:2	4C:31, 5C:11, 6C:3	4G:2
Arthropoda	Insecta	Coleoptera	Scarabaeidae	Protaetia	Protaetia brevitarsis	NC_023453.1	20319	4A:174, 5A:57, 6A:50, 7A:9, 8A:6, 9A:1	4T:185, 5T:44, 6T:11, 7T:3, 8T:3, 9T:1, 11T:2, 12T:1, 14T:1	4C:50, 5C:13, 6C:1, 8C:1	4G:2, 5G:1
Arthropoda	Insecta	Megaloptera	Corydalidae	Acanthacorydalis	Acanthacorydalis orientalis	NC_023462.1	15753	4A:131, 5A:62, 6A:24, 7A:7, 8A:5	4T:152, 5T:59, 6T:24, 7T:9, 8T:3, 10T:1, 15T:1	4C:13, 5C:6	4G:13, 5G:3, 7G:1
Arthropoda	Insecta	Orthoptera	Acrididae	Orinhippus	Orinhippus tibetanus	NC_023467.1	15611	4A:162, 5A:80, 6A:33, 7A:17, 8A:7, 9A:3, 12A:1	4T:63, 5T:20, 6T:2	4C:10, 5C:2	4G:1, 5G:3
Arthropoda	Insecta	Lepidoptera	Crambidae	Paracymoriza	Paracymoriza distinctalis	NC_023471.1	15354	4A:147, 5A:53, 6A:26, 7A:11, 8A:9, 9A:3, 11A:2, 13A:1	4T:179, 5T:54, 6T:24, 7T:16, 8T:10, 9T:4, 10T:3, 12T:1, 13T:1, 18T:1	4C:6, 5C:6, 6C:2	4G:3, 5G:3
Arthropoda	Malacostraca	Decapoda	Raninidae	Ranina	Ranina ranina	NC_023474.1	15557	4A:85, 5A:33, 6A:11, 7A:2, 8A:3	4T:126, 5T:48, 6T:20, 7T:9, 8T:3, 9T:1, 10T:1	4C:36, 5C:11, 6C:1	4G:6, 5G:1
Chordata	Actinopteri	Perciformes	Hexagrammidae	Pleurogrammus	Pleurogrammus monopterygius	NC_023475.1	16575	4A:60, 5A:19, 6A:4	4T:53, 5T:15, 6T:4, 7T:5, 8T:1, 12T:1	4C:85, 5C:36, 6C:12	4G:25, 5G:12, 6G:4
Arthropoda	Malacostraca	Decapoda	Geryonidae	Chaceon	Chaceon granulatus	NC_023476.1	16135	4A:105, 5A:37, 6A:16, 7A:6, 8A:2, 9A:4	4T:129, 5T:45, 6T:17, 7T:5, 8T:4, 9T:1, 11T:1	4C:36, 5C:8, 6C:3, 7C:1	4G:14, 5G:6, 6G:1, 7G:1
Nematoda	Chromadorea	Rhabditida	Ascarididae	Toxascaris	Toxascaris leonina	NC_023504.1	14310	4A:31, 5A:8, 6A:1, 7A:1	4T:262, 5T:120, 6T:51, 7T:45, 8T:20, 9T:10, 10T:8	4C:1	4G:32, 5G:9, 6G:2, 7G:1
Chordata	Chondrichthyes	Lamniformes	Odontaspididae	Carcharias	Carcharias taurus	NC_023520.1	16773	4A:93, 5A:43, 6A:12, 7A:3, 8A:2	4T:71, 5T:16, 6T:3, 7T:2, 9T:1	4C:64, 5C:25, 6C:6	4G:7, 5G:3
Nemertea	Pilidiophora	Heteronemertea	Lineidae	Iwatanemertes	Iwatanemertes piperata	NC_023523.1	16382	4A:58, 5A:23, 6A:7, 7A:3, 8A:3	4T:197, 5T:85, 6T:47, 7T:28, 8T:10, 9T:8, 10T:3, 11T:1	4C:11, 5C:1, 7C:1	4G:82, 5G:20, 6G:5, 7G:10, 8G:1
Chordata	Actinopteri	Pleuronectiformes	Soleidae	Liachirus	Liachirus melanospilos	NC_023539.1	17001	4A:86, 5A:43, 6A:6, 7A:2, 8A:1	4T:48, 5T:6, 6T:5, 7T:1, 12T:1	4C:78, 5C:36, 6C:15, 7C:3, 9C:1	4G:17, 5G:6, 6G:2
Echinodermata	Echinoidea	Camarodonta	Echinidae	Loxechinus	Loxechinus albus	NC_023770.1	15709	4A:86, 5A:49, 6A:12, 7A:1, 8A:3	4T:94, 5T:47, 6T:18, 7T:4, 8T:1	4C:48, 5C:11, 6C:4	4G:18, 5G:3, 6G:1, 19G:1
Echinodermata	Echinoidea	Camarodonta	Strongylocentrotidae	Hemicentrotus	Hemicentrotus pulcherrimus	NC_023771.1	15705	4A:81, 5A:27, 6A:10, 7A:2	4T:93, 5T:36, 6T:18, 7T:3, 8T:3	4C:44, 5C:11, 6C:3	4G:12, 5G:6, 6G:2, 17G:1
Chordata	Aves	Charadriiformes	Laridae	Ichthyaetus	Ichthyaetus relictus	NC_023777.1	16586	4A:82, 5A:24, 6A:6, 7A:3	4T:21, 5T:5, 8T:2	4C:65, 5C:32, 6C:12, 7C:4, 11C:1	4G:10, 5G:3
Chordata	Mammalia	Rodentia	Sciuridae	Ratufa	Ratufa bicolor	NC_023780.1	16563	4A:61, 5A:39, 6A:9, 7A:3	4T:53, 5T:12, 6T:4, 8T:1, 9T:1	4C:58, 5C:19, 6C:5, 9C:1	4G:9, 5G:4
Nematoda	Chromadorea	Rhabditida	Strongylidae	Chabertia	Chabertia erschowi	NC_023782.1	13705	4A:69, 5A:26, 6A:12, 7A:3, 8A:3, 9A:1	4T:209, 5T:96, 6T:52, 7T:32, 8T:11, 9T:6, 10T:2, 12T:1	4C:4, 5C:1	4G:21, 5G:13, 6G:2
Arthropoda	Hexanauplia	Harpacticoida	Miraciidae	Amphiascoides	Amphiascoides atopus	NC_023783.1	13831	4A:132, 5A:54, 6A:20, 7A:9, 8A:1, 13A:1	4T:98, 5T:31, 6T:17, 7T:1, 8T:5, 11T:1	4C:21, 5C:5, 6C:1, 13C:1	4G:39, 5G:9, 6G:4
Chordata	Actinopteri	Cypriniformes	Xenocyprididae	Parazacco	Parazacco spilurus	NC_023786.1	16612	4A:82, 5A:31, 6A:9, 7A:1, 8A:1	4T:71, 5T:15, 6T:4, 7T:1	4C:67, 5C:22, 6C:8, 7C:2, 9C:1	4G:26, 5G:12, 6G:2
Arthropoda	Insecta	Diptera	Phoridae	Megaselia	Megaselia scalaris	NC_023794.1	15599	4A:142, 5A:56, 6A:26, 7A:6, 8A:4, 9A:1, 23A:1	4T:142, 5T:48, 6T:23, 7T:5, 8T:4, 9T:2, 16T:1	4C:16, 5C:7, 6C:2	4G:6, 5G:2
Arthropoda	Insecta	Hemiptera	Miridae	Adelphocoris	Adelphocoris fasciaticollis	NC_023796.1	15434	4A:166, 5A:87, 6A:34, 7A:23, 8A:7, 9A:3, 10A:2, 11A:1	4T:83, 5T:21, 6T:6, 7T:3, 8T:3, 9T:1, 10T:1	4C:15, 5C:4, 6C:2	4G:3, 5G:3
Arthropoda	Malacostraca	Decapoda	Parastacidae	Geocharax	Geocharax gracilis	NC_023810.1	15924	4A:121, 5A:54, 6A:21, 7A:8, 8A:8, 9A:2, 10A:1, 13A:1	4T:110, 5T:53, 6T:19, 7T:5, 8T:4, 9T:5, 10T:2	4C:50, 5C:21, 6C:5, 7C:1, 9C:1	4G:8, 5G:2, 6G:1, 7G:1
Chordata	Actinopteri	Syngnathiformes	Syngnathidae	Corythoichthys	Corythoichthys flavofasciatus	KJ139455.1	16961	4A:83, 5A:25, 6A:6, 7A:1	4T:78, 5T:21, 6T:7, 7T:1, 8T:2, 11T:1	4C:65, 5C:27, 6C:12, 7C:2, 13C:1	4G:25, 5G:13, 6G:1
Arthropoda	Insecta	Lepidoptera	Papilionidae	Lamproptera	Lamproptera curius	KJ141168.1	15277	4A:145, 5A:58, 6A:28, 7A:10, 8A:7, 9A:4, 10A:3, 11A:2, 12A:1, 14A:1	4T:150, 5T:72, 6T:35, 7T:14, 8T:11, 9T:7, 14T:1, 16T:2	4C:19, 5C:6, 6C:4	4G:1, 5G:2
Chordata	Mammalia	Primates	Cheirogaleidae	Mirza	Mirza coquereli	KJ158463.1	15885	4A:74, 5A:30, 6A:11, 7A:6	4T:64, 5T:16, 6T:5, 7T:2	4C:46, 5C:13, 6C:1	4G:7, 5G:1, 6G:2
Chordata	Mammalia	Primates	Cercopithecidae	Erythrocebus	Erythrocebus patas	KJ434955.1	15458	4A:64, 5A:30, 6A:6, 7A:5, 8A:1	4T:40, 5T:6, 6T:5, 7T:1	4C:57, 5C:21, 6C:9, 15C:1	4G:10, 5G:5, 6G:1
Chordata	Mammalia	Primates	Cercopithecidae	Lophocebus	Lophocebus aterrimus	KJ434960.1	16283	4A:77, 5A:33, 6A:5, 7A:6, 8A:1	4T:35, 5T:10, 7T:1	4C:85, 5C:20, 6C:9, 7C:3, 8C:1	4G:3, 5G:4
Porifera	Demospongiae	Polymastiida	Polymastiidae	Polymastia	Polymastia littoralis	NC_023834.1	21719	4A:137, 5A:33, 6A:14, 7A:4	4T:236, 5T:72, 6T:26, 7T:15, 8T:9, 11T:3	4C:7	4G:74, 5G:31, 6G:4, 7G:1
Chordata	Actinopteri	Istiophoriformes	Istiophoridae	Istiompax	Istiompax indica	KJ510417.1	16532	4A:58, 5A:26, 6A:6, 7A:2, 8A:1	4T:32, 5T:8, 6T:2	4C:82, 5C:40, 6C:15	4G:16, 5G:7
Chordata	Aves	Pelecaniformes	Ardeidae	Nycticorax	Nycticorax nycticorax	KJ190954.1	19853	4A:88, 5A:34, 6A:5, 7A:3, 9A:2	4T:32, 5T:6, 6T:5	4C:87, 5C:31, 6C:15, 7C:4	4G:25, 5G:1, 6G:1
Chordata	Actinopteri	Carangiformes	Carangidae	Parastromateus	Parastromateus niger	KJ192332.1	16561	4A:76, 5A:19, 6A:3, 7A:1	4T:42, 5T:10, 6T:2, 7T:1	4C:73, 5C:43, 6C:7, 7C:1	4G:16, 5G:8
Arthropoda	Insecta	Orthoptera	Acrididae	Pacris	Pacris xizangensis	NC_023919.1	15622	4A:153, 5A:81, 6A:22, 7A:14, 8A:5, 9A:2, 10A:2	4T:105, 5T:29, 6T:4, 7T:3, 8T:1	4C:10, 6C:1	4G:3
Nemertea	Enopla	Monostilifera	Amphiporidae	Amphiporus	Amphiporus formidabilis	NC_023929.1	14616	4A:38, 5A:19, 6A:4, 7A:3, 8A:4, 9A:1, 11A:1	4T:217, 5T:114, 6T:70, 7T:49, 8T:28, 9T:13, 10T:12, 11T:5, 12T:1, 13T:2, 14T:1, 15T:1, 24T:1, 28T:1	4C:4	4G:46, 5G:12, 6G:3, 7G:3, 9G:1
Nemertea	Enopla	Monostilifera	Cratenemertidae	Nipponnemertes	Nipponnemertes punctatula	NC_023930.1	15354	4A:40, 5A:21, 6A:21, 7A:6, 8A:2, 9A:2	4T:223, 5T:102, 6T:68, 7T:40, 8T:32, 9T:13, 10T:14, 11T:3, 12T:2, 14T:2, 15T:2, 21T:2, 24T:1	4C:3	4G:46, 5G:12, 6G:6, 7G:4, 9G:1
Nemertea	Enopla	Monostilifera	Prosorhochmidae	Prosadenoporus	Prosadenoporus spectaculum	NC_023931.1	14655	4A:33, 5A:15, 6A:5, 7A:1, 8A:2, 9A:1	4T:238, 5T:108, 6T:88, 7T:44, 8T:28, 9T:12, 10T:10, 11T:4, 12T:4, 13T:2, 14T:1, 15T:2, 16T:1, 17T:1	4C:2	4G:28, 5G:7, 7G:1, 11G:1
Arthropoda	Insecta	Coleoptera	Cerambycidae	Massicus	Massicus raddei	NC_023937.1	15858	4A:137, 5A:63, 6A:26, 7A:15, 8A:5, 9A:1, 10A:1	4T:103, 5T:38, 6T:17, 7T:3, 8T:2	4C:18, 5C:12, 6C:2	4G:10, 6G:1
Arthropoda	Insecta	Lepidoptera	Papilionidae	Luehdorfia	Luehdorfia taibai	NC_023938.1	15553	4A:142, 5A:55, 6A:22, 7A:13, 8A:7, 9A:4, 10A:1, 11A:4, 13A:2	4T:144, 5T:61, 6T:31, 7T:15, 8T:10, 9T:4, 10T:4, 12T:1, 14T:1	4C:12, 5C:10, 6C:1	5G:1, 8G:1
Chordata	Aves	Galliformes	Phasianidae	Perdix	Perdix hodgsoniae	NC_023940.1	16699	4A:65, 5A:29, 6A:7, 7A:2	4T:30, 5T:8, 6T:3, 7T:2, 10T:1	4C:81, 5C:37, 6C:9, 7C:6, 9C:1	4G:14, 5G:6
Arthropoda	Thecostraca	Balanomorpha	Pyrgomatidae	Nobia	Nobia grandis	NC_023945.1	15032	4A:133, 5A:81, 6A:27, 7A:18, 8A:14, 9A:2, 10A:2	4T:134, 5T:64, 6T:25, 7T:8, 8T:5, 9T:1	4C:20, 5C:4	4G:1
Chordata	Mammalia	Primates	Cercopithecidae	Cercopithecus	Cercopithecus diana	NC_023963.1	16505	4A:61, 5A:36, 6A:6, 7A:5	4T:39, 5T:5, 6T:1, 8T:1	4C:90, 5C:26, 6C:11, 7C:3, 11C:1	4G:10, 5G:3
Chordata	Mammalia	Primates	Cercopithecidae	Allenopithecus	Allenopithecus nigroviridis	NC_023965.1	16517	4A:70, 5A:36, 6A:11, 7A:2, 8A:2	4T:41, 5T:13, 6T:3	4C:75, 5C:24, 6C:7, 7C:2, 9C:1, 11C:1	4G:9, 5G:1, 6G:2
Chordata	Aves	Anseriformes	Anatidae	Aix	Aix galericulata	NC_023969.1	16605	4A:68, 5A:25, 6A:8, 7A:1	4T:16, 5T:8, 6T:3	4C:73, 5C:44, 6C:12, 7C:2, 8C:1, 10C:1	4G:15, 5G:3, 6G:2
Chordata	Actinopteri	Pleuronectiformes	Soleidae	Pseudaesopia	Pseudaesopia japonica	NC_023973.1	16789	4A:67, 5A:31, 6A:5, 7A:2, 9A:1	4T:58, 5T:19, 6T:8, 7T:3, 11T:1	4C:90, 5C:47, 6C:24, 7C:3	4G:18, 5G:8, 6G:2
Arthropoda	Insecta	Orthoptera	Acrididae	Kingdonella	Kingdonella bicollina	NC_023920.1	15630	4A:160, 5A:78, 6A:22, 7A:14, 8A:8, 9A:2	4T:105, 5T:30, 6T:9, 7T:4, 17T:1	4C:5, 5C:2	4G:2, 5G:3
Arthropoda	Insecta	Orthoptera	Pyrgomorphidae	Mekongiella	Mekongiella kingdoni	NC_023921.1	15932	4A:169, 5A:78, 6A:30, 7A:17, 8A:4, 9A:1	4T:76, 5T:23, 6T:6, 7T:1, 8T:1, 12T:1	4C:15, 5C:3	4G:4, 5G:3, 7G:2
Annelida	Clitellata	Hirudinida	Haemopidae	Whitmania	Whitmania laevis	NC_023926.1	14433	4A:57, 5A:16, 6A:2, 7A:5, 8A:1, 9A:1	4T:146, 5T:47, 6T:20, 7T:7, 8T:8, 9T:2, 10T:3	4C:11, 5C:4, 7C:1	4G:25, 5G:5, 6G:1, 7G:1
Nematoda	Chromadorea	Rhabditida	Rhigonematidae	Rhigonema	Rhigonema thysanophora	NC_024020.1	15015	4A:38, 5A:15, 6A:16, 7A:2, 8A:3	4T:242, 5T:142, 6T:76, 7T:42, 8T:17, 9T:10, 10T:1	4C:8, 5C:7, 6C:1	4G:41, 5G:23, 6G:7
Arthropoda	Insecta	Mantodea	Leptomantellidae	Leptomantella	Leptomantella albella	NC_024028.1	15534	4A:121, 5A:57, 6A:11, 7A:14, 8A:5, 9A:2, 11A:1	4T:115, 5T:41, 6T:13, 7T:4, 8T:5, 9T:3, 10T:1	4C:11, 5C:4, 6C:2	4G:2, 5G:1
Arthropoda	Malacostraca	Decapoda	Parastacidae	Cherax	Cherax crassimanus	NC_024029.1	15807	4A:114, 5A:32, 6A:20, 7A:4, 8A:10	4T:97, 5T:50, 6T:23, 7T:3, 8T:2	4C:49, 5C:16, 6C:3, 7C:2	4G:11, 5G:2
Chordata	Mammalia	Perissodactyla	Equidae	Equus	Equus przewalskii	NC_024030.1	16592	4A:80, 5A:32, 6A:6, 7A:2, 8A:1	4T:33, 5T:9, 6T:3	4C:62, 5C:23, 6C:4, 7C:2	4G:7, 5G:2, 6G:1
Arthropoda	Insecta	Hymenoptera	Braconidae	Pseudognaptodon	Pseudognaptodon sp.	KJ412473.1	13190	4A:124, 5A:67, 6A:30, 7A:27, 8A:11, 9A:7, 10A:5, 11A:1	4T:163, 5T:78, 6T:43, 7T:20, 8T:12, 9T:2, 10T:2, 11T:2	4C:7, 5C:2, 6C:1	4G:8, 5G:6, 8G:1
Arthropoda	Insecta	Hymenoptera	Braconidae	Afrocampsis	Afrocampsis griseosetosus	KJ412474.1	10104	4A:69, 5A:36, 6A:18, 7A:9, 8A:4, 9A:2	4T:125, 5T:45, 6T:36, 7T:14, 8T:5, 9T:2, 10T:1	4C:4, 5C:4, 8C:1	4G:23, 5G:17, 6G:11, 7G:4, 8G:2
Nematoda	Chromadorea	Rhabditida	Anisakidae	Contracaecum	Contracaecum osculatum	NC_024037.1	13823	4A:33, 5A:16, 6A:6, 7A:1, 8A:1	4T:230, 5T:118, 6T:65, 7T:36, 8T:9, 9T:5, 10T:2, 11T:1	4C:7, 5C:2	4G:31, 5G:11, 6G:3
Chordata	Mammalia	Primates	Tarsiidae	Tarsius	Tarsius wallacei	NC_024053.1	16957	4A:82, 5A:35, 6A:12, 7A:1	4T:55, 5T:17, 6T:5, 7T:1	4C:59, 5C:27, 6C:1, 7C:2	4G:4, 5G:2, 10G:1
Arthropoda	Insecta	Hemiptera	Aleyrodidae	Bemisia	Bemisia afer	NC_024056.1	14968	4A:75, 5A:24, 6A:10, 7A:2, 21A:1	4T:133, 5T:50, 6T:12, 7T:4, 8T:3, 9T:1, 22T:1, 27T:1	4C:16, 5C:6, 6C:2	4G:42, 5G:11, 6G:8, 7G:2, 8G:2, 9G:1
Chordata	Actinopteri	Gobiiformes	Eleotridae	Mogurnda	Mogurnda adspersa	NC_024058.1	16523	4A:75, 5A:34, 6A:4, 7A:3, 8A:1	4T:50, 5T:26, 6T:6, 7T:5, 10T:1	4C:86, 5C:44, 6C:12, 7C:1	4G:16, 5G:9
Chordata	Aves	Charadriiformes	Jacanidae	Jacana	Jacana jacana	NC_024069.1	16975	4A:85, 5A:31, 6A:4, 7A:3	4T:34, 5T:11, 6T:4, 8T:1	4C:75, 5C:20, 6C:3, 7C:1, 8C:2, 9C:1	4G:10, 5G:3
Chordata	Ascidiacea	Stolidobranchia	Styelidae	Styela	Styela clava	HG931920.1	14616	4A:53, 5A:26, 6A:6, 7A:3, 9A:2	4T:176, 5T:87, 6T:34, 7T:23, 8T:7, 9T:6, 10T:4, 11T:2, 14T:1	4C:11, 5C:2, 6C:2	4G:34, 5G:5, 6G:2
Tardigrada	Heterotardigrada	Arthrotardigrada	Batillipedidae	Batillipes	Batillipes longispinosus	KF938943.1	15391	4A:116, 5A:46, 6A:10, 7A:1, 8A:3, 11A:2, 12A:5, 13A:1, 14A:2, 16A:1, 17A:1, 20A:1	4T:138, 5T:54, 6T:11, 7T:4, 8T:9, 9T:3, 10T:2, 11T:6, 12T:3, 13T:1, 14T:1, 15T:1, 16T:1, 19T:1	4C:18, 5C:10, 6C:3, 7C:1, 8C:2, 11C:1	4G:13, 5G:1, 6G:1
Tardigrada	Eutardigrada	Parachela	Doryphoribiidae	Pseudobiotus	Pseudobiotus spinifer	KF938944.1	16366	4A:176, 5A:75, 6A:29, 7A:31, 8A:8, 9A:5, 10A:1, 11A:2, 18A:1	4T:138, 5T:58, 6T:32, 7T:9, 8T:3, 9T:3, 10T:3, 18T:1	4C:34, 5C:25, 6C:6	4G:13, 5G:4, 6G:2, 7G:1
Chordata	Aves	Passeriformes	Hirundinidae	Cecropis	Cecropis daurica	NC_024107.1	17949	4A:79, 5A:42, 6A:6, 7A:1	4T:29, 5T:13, 6T:2	4C:66, 5C:39, 6C:13, 7C:1, 8C:2, 10C:1, 11C:1	4G:9, 5G:4, 6G:2
Chordata	Actinopteri	Syngnathiformes	Draconettidae	Draconetta	Draconetta xenica	AP006028.1	16617	4A:83, 5A:38, 6A:6, 7A:7, 8A:1, 9A:1	4T:92, 5T:21, 6T:6, 7T:3, 10T:1, 11T:1	4C:55, 5C:22, 6C:14, 7C:1	4G:12, 5G:10, 6G:2, 7G:1
Chordata	Actinopteri	Syngnathiformes	Syngnathidae	Doryrhamphus	Doryrhamphus japonicus	AP012309.1	16568	4A:65, 5A:27, 6A:6, 7A:2, 9A:1	4T:62, 5T:18, 6T:9, 11T:1	4C:75, 5C:33, 6C:12, 7C:1, 8C:1	4G:20, 5G:12, 6G:1
Chordata	Actinopteri	Syngnathiformes	Mullidae	Mulloidichthys	Mulloidichthys vanicolensis	AP012310.1	16563	4A:62, 5A:19, 6A:2, 7A:2	4T:31, 5T:8, 6T:2, 7T:1	4C:73, 5C:31, 6C:8, 7C:3, 10C:1	4G:20, 5G:4, 6G:1
Chordata	Actinopteri	Syngnathiformes	Mullidae	Upeneus	Upeneus japonicus	AB355921.1	15686	4A:51, 5A:16, 6A:3, 7A:1	4T:29, 5T:6, 6T:2, 7T:1	4C:71, 5C:34, 6C:7	4G:28, 5G:10, 6G:1
Chordata	Actinopteri	Syngnathiformes	Callionymidae	Foetorepus	Foetorepus altivelis	AP006027.1	16172	4A:71, 5A:30, 6A:6, 7A:2, 8A:1	4T:88, 5T:27, 6T:4, 7T:5	4C:77, 5C:44, 6C:12, 7C:3	4G:18, 5G:12, 6G:1, 7G:1
Chordata	Actinopteri	Syngnathiformes	Dactylopteridae	Dactyloptena	Dactyloptena orientalis	AP012311.1	16702	4A:70, 5A:18, 6A:9, 7A:1, 8A:1	4T:33, 5T:9, 6T:7, 7T:1	4C:89, 5C:40, 6C:14, 7C:2, 8C:1	4G:27, 5G:11, 7G:2
Chordata	Actinopteri	Syngnathiformes	Fistulariidae	Fistularia	Fistularia petimba	AP012312.1	16465	4A:57, 5A:16, 6A:3, 7A:1	4T:26, 5T:6, 6T:1, 7T:1	4C:78, 5C:55, 6C:13	4G:26, 5G:12
Chordata	Actinopteri	Syngnathiformes	Syngnathidae	Phycodurus	Phycodurus eques	AP012313.1	16520	4A:66, 5A:20, 6A:3	4T:73, 5T:25, 6T:3, 7T:1	4C:62, 5C:38, 6C:4	4G:20, 5G:7, 7G:1
Chordata	Actinopteri	Syngnathiformes	Callionymidae	Neosynchiropus	Neosynchiropus moyeri	AP012315.1	16837	4A:73, 5A:24, 6A:8, 7A:1	4T:82, 5T:29, 6T:7, 7T:3, 10T:1	4C:61, 5C:26, 6C:10, 7C:4	4G:26, 5G:14, 6G:4
Chordata	Actinopteri	Syngnathiformes	Callionymidae	Callionymus	Callionymus enneactis	AP012316.1	17171	4A:93, 5A:30, 6A:8, 7A:1, 8A:1	4T:74, 5T:30, 6T:14, 7T:8, 8T:1, 10T:1	4C:80, 5C:30, 6C:15, 7C:4	4G:30, 5G:16, 6G:6, 7G:1
Chordata	Actinopteri	Syngnathiformes	Syngnathidae	Syngnathus	Syngnathus schlegeli	AP012318.1	16465	4A:67, 5A:22, 6A:4, 7A:2	4T:68, 5T:19, 6T:7, 7T:3	4C:74, 5C:31, 6C:10	4G:26, 5G:11
Arthropoda	Malacostraca	Decapoda	Lithodidae	Lithodes	Lithodes nintokuae	AB769476.1	15731	4A:135, 5A:41, 6A:18, 7A:6, 8A:6, 9A:1	4T:144, 5T:63, 6T:21, 7T:11, 8T:5	4C:18, 5C:1, 6C:5	4G:11, 5G:2, 6G:2
Nematoda	Chromadorea	Rhabditida	Meloidogynidae	Meloidogyne	Meloidogyne graminicola	HG529223.2	20030	4A:124, 5A:37, 6A:19, 7A:5, 8A:4	4T:312, 5T:257, 6T:105, 7T:51, 8T:49, 9T:32, 10T:19, 11T:14, 12T:5, 13T:1, 14T:1, 15T:1	4C:3, 6C:1	4G:14, 5G:2, 6G:1
Arthropoda	Insecta	Hymenoptera	Megalyridae	Megalyra	Megalyra sp.	KJ577600.1	18996	4A:147, 5A:58, 6A:33, 7A:5, 8A:5, 10A:1, 13A:1	4T:199, 5T:86, 6T:39, 7T:15, 8T:5, 9T:1, 10T:4, 14T:1	4C:5, 5C:2, 6C:1	4G:23, 5G:9, 6G:6, 7G:3
Arthropoda	Collembola	Entomobryomorpha	Isotomidae	Folsomotoma	Folsomotoma octooculata	NC_024155.1	15338	4A:150, 5A:50, 6A:22, 7A:10, 8A:8, 9A:1, 10A:4, 11A:1	4T:129, 5T:52, 6T:12, 7T:4, 8T:6	4C:32, 5C:12, 6C:3, 7C:2	4G:12, 5G:4, 6G:2
Mollusca	Polyplacophora	Chitonida	Chitonidae	Sypharochiton	Sypharochiton pelliserpentis	NC_024174.1	15048	4A:103, 5A:35, 6A:21, 7A:15, 8A:6, 9A:2, 10A:1	4T:138, 5T:74, 6T:37, 7T:17, 8T:12, 9T:1, 10T:2	4C:13, 5C:4	4G:19, 5G:6, 6G:1
Echinodermata	Echinoidea	Camarodonta	Strongylocentrotidae	Mesocentrotus	Mesocentrotus franciscanus	NC_024177.1	15649	4A:74, 5A:28, 6A:10, 7A:1, 8A:1	4T:92, 5T:29, 6T:10, 7T:2	4C:34, 5C:19, 6C:2, 7C:1	4G:15, 5G:5, 6G:1, 20G:1
Cnidaria	Anthozoa	Scleralcyonacea	Ellisellidae	Junceella	Junceella fragilis	NC_024181.1	18724	4A:65, 5A:15, 6A:2, 7A:1	4T:85, 5T:21, 6T:4	4C:40, 5C:9, 6C:3	4G:53, 5G:21, 6G:4, 7G:2, 8G:1
Chordata	Actinopteri	Spariformes	Sparidae	Sparus	Sparus aurata	NC_024236.1	16652	4A:56, 5A:20, 6A:3	4T:57, 5T:18, 6T:9, 7T:1	4C:75, 5C:34, 6C:11, 14C:1	4G:22, 5G:11, 6G:1, 7G:1
Chordata	Actinopteri	Anabantiformes	Channidae	Channa	Channa marulius	AB968638.1	16569	4A:77, 5A:26, 6A:6, 7A:2	4T:38, 5T:12, 6T:3, 8T:1	4C:90, 5C:44, 6C:13, 7C:2, 8C:1	4G:12, 5G:5, 6G:1
Mollusca	Gastropoda	Aplysiida	Aplysiidae	Aplysia	Aplysia kurodai	NC_024260.1	14131	4A:71, 5A:36, 6A:10, 7A:3, 10A:1	4T:134, 5T:64, 6T:12, 7T:4, 8T:4	4C:10	4G:19, 5G:7
Chordata	Aves	Passeriformes	Aegithalidae	Aegithalos	Aegithalos glaucogularis	NC_024268.1	17937	4A:78, 5A:25, 6A:3, 7A:5	4T:29, 5T:12, 6T:4, 7T:4	4C:62, 5C:24, 6C:8, 7C:4, 8C:2, 9C:1, 11C:1, 12C:1	4G:10, 5G:1, 8G:1
Arthropoda	Insecta	Coleoptera	Bothrideridae	Dastarcus	Dastarcus helophoroides	NC_024271.1	15878	4A:153, 5A:91, 6A:32, 7A:15, 8A:7, 9A:1, 10A:2, 12A:1	4T:129, 5T:65, 6T:20, 7T:9, 8T:5, 9T:1, 10T:1, 16T:1	4C:14, 5C:5, 6C:2	4G:3
Arthropoda	Insecta	Lepidoptera	Crambidae	Maruca	Maruca testulalis	NC_024283.1	15110	4A:155, 5A:49, 6A:26, 7A:16, 8A:4, 9A:2, 10A:1, 11A:4	4T:164, 5T:59, 6T:26, 7T:13, 8T:9, 9T:3, 10T:7, 11T:1, 12T:1, 15T:1	4C:8, 5C:5, 6C:2	4G:1
Chordata	Actinopteri	Pleuronectiformes	Soleidae	Aseraggodes	Aseraggodes kobensis	NC_024285.1	16944	4A:98, 5A:40, 6A:7, 7A:2, 8A:1	4T:40, 5T:16, 6T:3, 7T:1	4C:71, 5C:26, 6C:9, 7C:1	4G:17, 5G:9, 6G:5
Arthropoda	Arachnida	Araneae	Salticidae	Telamonia	Telamonia vlijmi	NC_024287.1	14601	4A:111, 5A:34, 6A:6, 7A:4, 9A:1	4T:151, 5T:67, 6T:28, 7T:11, 8T:11, 9T:2, 10T:1, 11T:1	4C:7, 5C:3	4G:20, 5G:5
Arthropoda	Malacostraca	Decapoda	Parastacidae	Gramastacus	Gramastacus lacus	NC_024295.1	15764	4A:131, 5A:55, 6A:15, 7A:10, 8A:7, 10A:1	4T:111, 5T:40, 6T:22, 7T:7, 8T:4, 9T:1	4C:50, 5C:23, 6C:5, 7C:6	4G:15, 5G:7, 6G:1, 7G:1
Chordata	Ascidiacea	Stolidobranchia	Styelidae	Botrylloides	Botrylloides violaceus	NC_024256.1	14357	4A:53, 5A:14, 6A:7, 7A:1	4T:197, 5T:98, 6T:68, 7T:28, 8T:4, 9T:1	4C:5	4G:31, 5G:10, 6G:5
Chordata	Actinopteri	Siluriformes	Schilbidae	Eutropiichthys	Eutropiichthys vacha	AB919123.1	16478	4A:73, 5A:28, 6A:8, 7A:1	4T:45, 5T:13, 6T:1, 15T:1	4C:81, 5C:16, 6C:7, 7C:1	4G:18, 5G:11
Arthropoda	Insecta	Lepidoptera	Crambidae	Hellula	Hellula undalis	KJ636057.1	14678	4A:138, 5A:49, 6A:28, 7A:15, 8A:4, 9A:1, 11A:2, 12A:1, 13A:1	4T:169, 5T:65, 6T:29, 7T:14, 8T:7, 9T:5, 11T:1	4C:18, 5C:12, 6C:5, 7C:1	4G:8, 5G:2
Arthropoda	Arachnida	Sarcoptiformes	Acaridae	Aleuroglyphus	Aleuroglyphus ovatus	KJ571488.1	14305	4A:35, 5A:12, 6A:3	4T:185, 5T:124, 6T:58, 7T:26, 8T:18, 9T:6, 10T:2	4C:11, 5C:7, 6C:5	4G:40, 5G:17, 6G:5, 7G:1
Chordata	Actinopteri	Pleuronectiformes	Soleidae	Brachirus	Brachirus orientalis	KJ433558.1	16602	4A:77, 5A:37, 6A:6, 7A:3, 8A:1	4T:50, 5T:14, 6T:1, 7T:2, 8T:1, 9T:1	4C:71, 5C:32, 6C:10, 7C:3, 9C:1	4G:19, 5G:11, 6G:2, 7G:1
Arthropoda	Insecta	Lepidoptera	Hepialidae	Napialus	Napialus hunanensis	NC_024424.1	15301	4A:143, 5A:44, 6A:29, 7A:10, 8A:4, 9A:4, 10A:1, 11A:3, 13A:1	4T:165, 5T:54, 6T:28, 7T:12, 8T:10, 9T:3, 10T:7, 11T:3, 15T:1	4C:13, 5C:4	4G:4, 5G:2, 6G:1
Arthropoda	Insecta	Lepidoptera	Nymphalidae	Ideopsis	Ideopsis similis	NC_024428.1	15200	4A:132, 5A:42, 6A:21, 7A:9, 8A:5, 9A:1, 11A:4	4T:149, 5T:67, 6T:36, 7T:15, 8T:10, 9T:2, 10T:4, 11T:2, 12T:1, 13T:1, 19T:1	4C:10, 5C:6, 7C:1
Chordata	Actinopteri	Cypriniformes	Gobionidae	Paracanthobrama	Paracanthobrama guichenoti	NC_024430.1	16607	4A:83, 5A:28, 6A:7, 7A:5	4T:85, 5T:28, 6T:6, 7T:3, 9T:1	4C:52, 5C:30, 6C:10	4G:15, 5G:9, 6G:2, 7G:1
Arthropoda	Malacostraca	Decapoda	Matutidae	Ashtoret	Ashtoret lunaris	NC_024435.1	15807	4A:125, 5A:42, 6A:18, 7A:7, 8A:2	4T:129, 5T:46, 6T:16, 7T:6, 8T:4	4C:21, 5C:7	4G:4, 5G:1
Arthropoda	Malacostraca	Decapoda	Menippidae	Myomenippe	Myomenippe fornasinii	NC_024437.1	15658	4A:115, 5A:42, 6A:15, 7A:7, 8A:4, 9A:1, 10A:1	4T:151, 5T:57, 6T:17, 7T:6, 8T:6, 9T:1, 10T:1, 11T:1	4C:19, 5C:7
Arthropoda	Malacostraca	Decapoda	Portunidae	Thalamita	Thalamita crenata	NC_024438.1	15787	4A:106, 5A:41, 6A:12, 7A:5, 8A:3, 9A:1	4T:116, 5T:34, 6T:12, 7T:6, 8T:2, 9T:1	4C:24, 5C:8, 6C:2	4G:10, 5G:1
Arthropoda	Branchiopoda	Notostraca	Triopsidae	Triops	Triops australiensis	NC_024439.1	15125	4A:107, 5A:46, 6A:24, 7A:9, 8A:5, 9A:1	4T:118, 5T:46, 6T:21, 7T:5, 8T:4	4C:18, 5C:5	4G:14, 5G:1, 6G:2
Arthropoda	Malacostraca	Decapoda	Scyllaridae	Thenus	Thenus orientalis	NC_024440.1	16826	4A:97, 5A:25, 6A:12, 7A:2, 8A:7	4T:104, 5T:43, 6T:10, 7T:7, 8T:5, 9T:2, 10T:1	4C:69, 5C:39, 6C:11, 9C:1	4G:16, 5G:6, 6G:2, 7G:2
Arthropoda	Malacostraca	Decapoda	Parastacidae	Engaeus	Engaeus quadrimanus	NC_024442.1	17321	4A:131, 5A:62, 6A:27, 7A:11, 8A:7, 16A:1, 18A:1	4T:118, 5T:40, 6T:14, 7T:3, 8T:5, 9T:2, 10T:1	4C:66, 5C:30, 6C:7, 7C:2, 9C:1	4G:5, 5G:3, 6G:3
Echinodermata	Echinoidea	Camarodonta	Echinidae	Sterechinus	Sterechinus neumayeri	KJ680295.1	15707	4A:87, 5A:33, 6A:8, 7A:1	4T:112, 5T:52, 6T:18, 7T:6, 8T:4, 9T:1	4C:45, 5C:10, 6C:5, 7C:1	4G:23, 5G:4, 7G:1, 22G:1
Arthropoda	Insecta	Coleoptera	Coccinellidae	Coleomegilla	Coleomegilla maculata	KJ778881.1	17516	4A:178, 5A:81, 6A:39, 7A:25, 8A:14, 9A:6, 10A:3, 11A:2, 13A:1	4T:187, 5T:71, 6T:26, 7T:12, 8T:5, 9T:2, 12T:1, 16T:1	4C:23, 5C:7, 6C:1, 7C:1	4G:10, 5G:1, 7G:1
Arthropoda	Insecta	Coleoptera	Coccinellidae	Cycloneda	Cycloneda sanguinea	KJ778883.1	15137	4A:160, 5A:85, 6A:40, 7A:24, 8A:10, 9A:4, 10A:4, 11A:1	4T:136, 5T:58, 6T:24, 7T:10, 8T:8, 11T:1, 18T:1	4C:19, 5C:2	4G:4, 5G:1, 6G:1
Arthropoda	Insecta	Hemiptera	Pentatomidae	Euschistus	Euschistus variolarius	KJ778885.1	12077	4A:114, 5A:63, 6A:15, 7A:11, 8A:2	4T:50, 5T:12, 6T:5, 7T:3	4C:22, 5C:4, 6C:2	4G:8, 5G:3
Porifera	Hexactinellida	Amphidiscosida	Hyalonematidae	Lophophysema	Lophophysema eversa	KM035411.1	20591	4A:197, 5A:113, 6A:49, 7A:28, 8A:26, 9A:3, 10A:3	4T:59, 5T:17, 6T:7, 7T:2, 8T:2	4C:19, 5C:3, 6C:2, 7C:1	4G:7, 5G:2, 6G:3
Chordata	Aves	Galliformes	Odontophoridae	Rhynchortyx	Rhynchortyx cinctus	KJ914547.1	15652	4A:66, 5A:22, 6A:8, 7A:2, 10A:1	4T:21, 5T:6	4C:94, 5C:31, 6C:11, 7C:5, 8C:1, 9C:1	4G:14, 5G:1, 7G:3
Arthropoda	Insecta	Hemiptera	Peloridiidae	Xenophyes	Xenophyes cascus	LK054492.1	15471	4A:70, 5A:17, 6A:2, 7A:2, 8A:1	4T:149, 5T:38, 6T:13, 7T:7, 8T:3, 9T:3	4C:13, 5C:5, 6C:1, 7C:2	4G:38, 5G:14, 6G:8, 7G:3, 11G:1
Chordata	Chondrichthyes	Carcharhiniformes	Carcharhinidae	Glyphis	Glyphis glyphis	NC_021768.2	16701	4A:80, 5A:37, 6A:8, 7A:2, 9A:2	4T:59, 5T:18, 6T:3, 7T:2, 8T:1	4C:43, 5C:18, 6C:2, 7C:1	4G:5
Chordata	Aves	Galliformes	Phasianidae	Pavo	Pavo cristatus	NC_024533.1	16686	4A:75, 5A:32, 6A:6, 7A:2, 8A:1	4T:31, 5T:6, 6T:6	4C:86, 5C:33, 6C:7, 7C:6	4G:13, 5G:2, 6G:1, 7G:1
Arthropoda	Insecta	Lepidoptera	Pyralidae	Lista	Lista haraldusalis	NC_024535.1	15213	4A:133, 5A:62, 6A:26, 7A:12, 8A:10, 9A:3, 11A:2, 12A:1, 13A:1	4T:167, 5T:68, 6T:26, 7T:22, 8T:8, 9T:4, 10T:3, 11T:1, 18T:1	4C:12, 5C:6, 6C:2, 7C:1	4G:2, 5G:2
Arthropoda	Insecta	Lepidoptera	Nymphalidae	Triphysa	Triphysa phryne	NC_024551.1	15143	4A:136, 5A:44, 6A:26, 7A:9, 8A:4, 9A:5, 10A:2, 11A:1	4T:188, 5T:69, 6T:34, 7T:15, 8T:5, 9T:1, 10T:3, 19T:1	4C:22, 5C:15, 6C:3	4G:2, 5G:5
Chordata	Aves	Galliformes	Phasianidae	Lyrurus	Lyrurus tetrix	NC_024554.1	16677	4A:82, 5A:26, 6A:6, 7A:5	4T:45, 5T:14, 6T:3, 7T:1, 8T:1	4C:80, 5C:34, 6C:8, 7C:4, 10C:1, 11C:1, 13C:1	4G:14, 5G:2, 6G:1, 7G:1
Chordata	Lepidosauria	Squamata	Pygopodidae	Aprasia	Aprasia parapulchella	NC_024557.1	16528	4A:103, 5A:37, 6A:10, 7A:4, 8A:1	4T:52, 5T:19, 6T:6, 7T:5	4C:70, 5C:39, 6C:10, 7C:2	4G:13, 5G:3
Chordata	Mammalia	Carnivora	Nandiniidae	Nandinia	Nandinia binotata	NC_024567.1	17103	4A:77, 5A:38, 6A:12, 7A:4, 8A:2	4T:30, 5T:8, 6T:4	4C:55, 5C:15, 6C:8, 7C:1	4G:6, 5G:1, 7G:1
Chordata	Mammalia	Carnivora	Viverridae	Genetta	Genetta servalina	NC_024568.1	16938	4A:71, 5A:39, 6A:10, 7A:3, 8A:2	4T:41, 5T:14, 6T:2	4C:48, 5C:14, 6C:2	4G:8, 5G:3, 7G:1
Chordata	Mammalia	Carnivora	Viverridae	Prionodon	Prionodon pardicolor	NC_024569.1	16718	4A:73, 5A:34, 6A:10, 7A:3, 8A:3	4T:49, 5T:12, 6T:3, 7T:1, 10T:1	4C:53, 5C:17, 6C:3	4G:11, 5G:3, 7G:1
Arthropoda	Insecta	Lepidoptera	Riodinidae	Apodemia	Apodemia mormo	NC_024571.1	15262	4A:115, 5A:38, 6A:22, 7A:11, 8A:4, 9A:4, 10A:2	4T:169, 5T:75, 6T:35, 7T:14, 8T:8, 9T:2, 10T:5, 17T:1	4C:13, 5C:7, 6C:1, 7C:1	4G:3, 5G:3
Arthropoda	Insecta	Hemiptera	Triozidae	Paratrioza	Paratrioza sinica	NC_024577.1	14863	4A:133, 5A:56, 6A:26, 7A:12, 8A:2, 9A:4, 10A:1, 12A:2	4T:104, 5T:46, 6T:17, 7T:8, 8T:4, 9T:3, 10T:1	4C:32, 5C:15, 6C:6, 7C:2, 8C:1, 9C:1	4G:7, 5G:3, 6G:1
Arthropoda	Insecta	Hemiptera	Anthocoridae	Orius	Orius sauteri	NC_024583.1	16246	4A:171, 5A:94, 6A:42, 7A:20, 8A:10, 9A:1	4T:120, 5T:33, 6T:10, 7T:4, 8T:1	4C:6, 5C:5, 6C:1	4G:5, 5G:3, 7G:1, 13G:1
Chordata	Actinopteri	Cypriniformes	Cyprinidae	Pseudogyrinocheilus	Pseudogyrinocheilus prochilus	NC_024588.1	16595	4A:84, 5A:26, 6A:4, 7A:2	4T:55, 5T:10, 6T:3	4C:66, 5C:21, 6C:6, 7C:1	4G:17, 5G:6, 6G:2
Chordata	Chondrichthyes	Rajiformes	Arhynchobatidae	Pavoraja	Pavoraja nitida	NC_024599.1	16760	4A:76, 5A:40, 6A:10, 7A:6, 8A:2, 9A:1	4T:93, 5T:22, 6T:7, 7T:4, 8T:2	4C:36, 5C:17, 6C:5	4G:7, 5G:3, 6G:1
Arthropoda	Insecta	Lepidoptera	Nymphalidae	Tirumala	Tirumala limniace	NC_024605.1	15285	4A:127, 5A:41, 6A:21, 7A:8, 8A:4, 9A:3, 10A:3, 11A:1, 21A:1	4T:181, 5T:76, 6T:37, 7T:11, 8T:14, 9T:5, 10T:2, 11T:3, 12T:1, 18T:1	4C:20, 5C:10, 7C:1	4G:2, 5G:3
Chordata	Actinopteri	Cypriniformes	Balitoridae	Lepturichthys	Lepturichthys fimbriata	NC_024609.1	16567	4A:80, 5A:23, 6A:6, 7A:4	4T:44, 5T:13, 6T:2, 7T:1	4C:72, 5C:23, 6C:9	4G:20, 5G:6, 6G:2
Chordata	Aves	Galliformes	Phasianidae	Ptilopachus	Ptilopachus petrosus	NC_024616.1	16773	4A:86, 5A:28, 6A:4, 7A:5	4T:32, 5T:10, 6T:2, 7T:2, 9T:1	4C:66, 5C:30, 6C:8, 7C:3, 10C:1	4G:4, 5G:3, 7G:1
Chordata	Aves	Galliformes	Cracidae	Crax	Crax rubra	NC_024618.1	16666	4A:79, 5A:23, 6A:5, 7A:4, 9A:1	4T:24, 5T:9, 6T:3, 7T:1, 8T:1, 9T:1	4C:88, 5C:46, 6C:10, 7C:1, 8C:2, 9C:1	4G:17, 5G:4
Chordata	Aves	Galliformes	Phasianidae	Caloperdix	Caloperdix oculeus	NC_024619.1	16488	4A:76, 5A:21, 6A:5, 7A:4, 9A:1	4T:32, 5T:9, 6T:2, 7T:2	4C:78, 5C:27, 6C:6, 7C:7, 8C:1	4G:17, 5G:5, 6G:1, 7G:1
Chordata	Aves	Galliformes	Odontophoridae	Colinus	Colinus virginianus	NC_024620.1	16702	4A:74, 5A:26, 6A:7, 7A:4	4T:22, 5T:4, 6T:2, 7T:1	4C:84, 5C:43, 6C:14, 7C:8, 8C:4, 9C:1	4G:7, 5G:2, 6G:1
Arthropoda	Arachnida	Sarcoptiformes	Psoroptidae	Psoroptes	Psoroptes ovis	KJ957822.1	14247	4A:90, 5A:28, 6A:13, 7A:7, 8A:2, 9A:1	4T:200, 5T:111, 6T:46, 7T:26, 8T:9, 9T:4	4C:11, 5C:7, 6C:1, 8C:2	4G:44, 5G:19, 6G:2
Arthropoda	Insecta	Archaeognatha	Machilidae	Pedetontinus	Pedetontinus luanchuanensis	KJ754502.1	14106	4A:119, 5A:52, 6A:22, 7A:10, 8A:6	4T:116, 5T:32, 6T:11, 7T:5, 8T:2, 10T:1	4C:14, 5C:1	4G:6, 5G:1
Chordata	Actinopteri	Cypriniformes	Gobionidae	Ladislavia	Ladislavia taczanowskii	NC_024634.1	16613	4A:74, 5A:19, 6A:5	4T:56, 5T:10, 6T:2, 7T:2	4C:50, 5C:27, 6C:12, 7C:4	4G:33, 5G:15, 6G:4
Arthropoda	Insecta	Lepidoptera	Hesperiidae	Choaspes	Choaspes benjaminii	NC_024647.1	15300	4A:143, 5A:55, 6A:23, 7A:12, 8A:6, 9A:3, 10A:2, 11A:2, 13A:1	4T:148, 5T:66, 6T:26, 7T:9, 8T:8, 9T:3, 10T:1, 13T:1, 23T:1	4C:21, 5C:10, 6C:8, 8C:1	4G:1, 5G:1
Arthropoda	Insecta	Lepidoptera	Hesperiidae	Potanthus	Potanthus flavus	NC_024650.1	15267	4A:127, 5A:49, 6A:26, 7A:11, 8A:1, 9A:5, 10A:2, 11A:3	4T:175, 5T:70, 6T:40, 7T:14, 8T:9, 9T:2, 10T:1, 19T:1	4C:20, 5C:10, 6C:3	4G:3, 5G:1
Annelida	Polychaeta	Sabellida	Siboglinidae	Ridgeia	Ridgeia piscesae	NC_024653.1	15002	4A:63, 5A:30, 6A:7, 7A:1, 10A:1	4T:103, 5T:24, 6T:6, 7T:2, 9T:1	4C:45, 5C:12, 6C:3, 7C:1	4G:14, 5G:6
Nematoda	Chromadorea	Rhabditida	Filaroididae	Parafilaroides	Parafilaroides normani	NC_024656.1	13414	4A:21, 5A:6, 7A:1	4T:224, 5T:132, 6T:74, 7T:52, 8T:14, 9T:25, 10T:13, 12T:2, 13T:2	5C:3	4G:28, 5G:14, 6G:2, 7G:1
Arthropoda	Insecta	Megaloptera	Corydalidae	Dysmicohermes	Dysmicohermes ingens	NC_024657.1	16271	4A:133, 5A:64, 6A:23, 7A:12, 8A:5, 9A:5, 10A:1	4T:156, 5T:51, 6T:26, 7T:12, 8T:7, 9T:1, 10T:2	4C:10, 5C:4	4G:4, 5G:1
Nemertea	Enopla	Monostilifera	Tetrastemmatidae	Tetrastemma	Tetrastemma olgarum	NC_024670.1	14580	4A:43, 5A:20, 6A:8, 7A:4, 8A:3, 9A:3, 12A:1	4T:221, 5T:119, 6T:69, 7T:44, 8T:26, 9T:9, 10T:18, 11T:2, 12T:2, 13T:1, 14T:5, 15T:1, 16T:2, 17T:1, 20T:1, 21T:1, 22T:1	4C:7, 5C:1, 9C:1	4G:40, 5G:9, 6G:5, 8G:2
Chordata	Aves	Passeriformes	Certhiidae	Henicorhina	Henicorhina leucosticta	NC_024673.1	16727	4A:76, 5A:29, 6A:3, 7A:2	4T:27, 5T:13, 6T:1, 9T:1	4C:78, 5C:34, 6C:11, 7C:1, 8C:3, 9C:1	4G:11, 5G:2
Chordata	Actinopteri	Salmoniformes	Salmonidae	Brachymystax	Brachymystax tumensis	NC_024674.1	16836	4A:68, 5A:17, 6A:2	4T:40, 5T:22, 6T:3, 7T:1, 13T:1	4C:69, 5C:44, 6C:7	4G:21, 5G:8, 6G:3
Chordata	Aves	Passeriformes	Tyrannidae	Mionectes	Mionectes oleagineus	NC_024682.1	17023	4A:86, 5A:30, 6A:7, 7A:3	4T:40, 5T:15, 6T:7, 7T:1	4C:67, 5C:34, 6C:9, 7C:7	4G:9, 5G:3
Arthropoda	Insecta	Hemiptera	Aphididae	Sitobion	Sitobion avenae	NC_024683.1	15180	4A:197, 5A:89, 6A:32, 7A:25, 8A:17, 9A:9, 11A:2, 12A:2, 24A:1, 25A:1, 30A:1	4T:166, 5T:55, 6T:28, 7T:12, 8T:4, 9T:2, 10T:1	4C:3, 5C:2	4G:1
Chordata	Actinopteri	Perciformes	Scorpaenidae	Pterois	Pterois miles	LK022697.1	16497	4A:67, 5A:20, 6A:5, 7A:1	4T:42, 5T:9, 6T:3, 7T:1, 8T:1	4C:85, 5C:35, 6C:11, 7C:3	4G:24, 5G:18, 6G:1
Porifera	Hexactinellida	Lyssacinosida	Rossellidae	Bathydorus	Bathydorus laniger	KJ634155.1	15705	4A:159, 5A:71, 6A:31, 7A:12, 8A:6, 9A:2	4T:66, 5T:25, 6T:8, 7T:3, 10T:1	4C:10, 5C:3, 6C:1	4G:4
Porifera	Hexactinellida	Lyssacinosida	Euplectellidae	Docosaccus	Docosaccus maculatus	KJ634156.1	17146	4A:175, 5A:83, 6A:35, 7A:9, 8A:3, 9A:5, 10A:1	4T:49, 5T:22, 6T:5, 7T:2, 8T:3	4C:21, 5C:3, 6C:1	4G:3
Arthropoda	Insecta	Hemiptera	Reduviidae	Brontostoma	Brontostoma colossus	NC_024745.1	16625	4A:158, 5A:96, 6A:25, 7A:19, 8A:10, 9A:4, 11A:1	4T:96, 5T:24, 6T:8, 7T:1, 9T:1	4C:22, 5C:10, 6C:3, 7C:1	4G:5, 5G:3, 6G:2, 7G:5, 8G:3
Chordata	Aves	Anseriformes	Anatidae	Tadorna	Tadorna tadorna	NC_024750.1	16604	4A:72, 5A:20, 6A:4, 7A:4	4T:22, 5T:9, 6T:1	4C:73, 5C:46, 6C:14, 7C:1, 8C:1, 12C:1	4G:19, 5G:3, 6G:2
Arthropoda	Malacostraca	Decapoda	Atyidae	Caridina	Caridina gracilipes	NC_024751.1	15550	4A:108, 5A:31, 6A:4, 7A:8, 8A:3, 9A:1	4T:74, 5T:32, 6T:7, 7T:4, 8T:4, 9T:1	4C:34, 5C:12, 6C:6	4G:10, 5G:2
Platyhelminthes	Monogenea	Gyrodactylidea	Gyrodactylidae	Paragyrodactylus	Paragyrodactylus variegatus	NC_024754.1	14517	4A:78, 5A:31, 6A:10, 7A:9, 8A:4	4T:248, 5T:103, 6T:65, 7T:22, 8T:9	4C:4	4G:15, 5G:3
Chordata	Actinopteri	Centrarchiformes	Sinipercidae	Siniperca	Siniperca scherzeri	AP014527.1	16501	4A:62, 5A:26, 6A:5, 7A:1	4T:37, 5T:19, 6T:2	4C:83, 5C:45, 6C:12	4G:22, 5G:8
Chordata	Actinopteri	Centrarchiformes	Percichthyidae	Maccullochella	Maccullochella peelii	AP014532.1	16442	4A:90, 5A:37, 6A:10, 7A:2, 8A:1	4T:53, 5T:12, 6T:6, 7T:1, 8T:1	4C:78, 5C:24, 6C:6, 7C:2	4G:16, 5G:2
Chordata	Actinopteri	Centrarchiformes	Centrarchidae	Micropterus	Micropterus salmoides	AP014537.1	16165	4A:50, 5A:24, 6A:5, 7A:2	4T:56, 5T:12, 6T:5, 7T:1, 10T:1	4C:85, 5C:38, 6C:15, 11C:1	4G:22, 5G:8, 6G:1
Chordata	Actinopteri	Centrarchiformes	Percichthyidae	Percichthys	Percichthys trucha	AP006791.1	16232	4A:48, 5A:21, 6A:7, 7A:2	4T:56, 5T:20, 6T:3, 7T:2, 11T:1	4C:71, 5C:46, 6C:9, 10C:1, 12C:1	4G:25, 5G:22, 6G:1
Chordata	Mammalia	Artiodactyla	Cervidae	Dama	Dama mesopotamica	NC_024819.1	16355	4A:81, 5A:40, 6A:9, 7A:4, 8A:1	4T:67, 5T:18, 6T:4, 7T:2	4C:49, 5C:11, 6C:6, 8C:1	4G:8, 5G:4, 6G:1
Nemertea	Enopla	Monostilifera	Prosorhochmidae	Gononemertes	Gononemertes parasita	NC_024822.1	14742	4A:26, 5A:11, 6A:6, 7A:2	4T:213, 5T:122, 6T:98, 7T:54, 8T:35, 9T:19, 10T:18, 11T:7, 12T:3, 14T:2, 17T:1, 19T:1, 20T:1	4C:3, 5C:2, 14C:1	4G:44, 5G:8, 6G:2, 8G:3
Nemertea	Enopla	Monostilifera	Emplectonematidae	Nemertopsis	Nemertopsis tetraclitophila	NC_024823.1	14597	4A:49, 5A:15, 6A:3, 7A:2, 8A:2, 9A:2	4T:248, 5T:112, 6T:60, 7T:56, 8T:32, 9T:18, 10T:11, 11T:2, 12T:4, 13T:4, 15T:1, 16T:2, 17T:1, 18T:1, 33T:1	4C:2	4G:27, 5G:6, 6G:1, 7G:1, 10G:1
Arthropoda	Insecta	Neuroptera	Nymphidae	Nymphes	Nymphes myrmeleonoides	NC_024825.1	15712	4A:126, 5A:46, 6A:19, 7A:11, 8A:6, 9A:1	4T:174, 5T:61, 6T:27, 7T:11, 8T:6, 9T:4, 12T:1	4C:9, 5C:4	4G:2, 5G:2
Chordata	Actinopteri	Cichliformes	Cichlidae	Petenia	Petenia splendida	NC_024835.1	16518	4A:69, 5A:30, 6A:8	4T:52, 5T:20, 6T:4, 11T:1	4C:80, 5C:56, 6C:14, 7C:5	4G:18, 5G:9, 6G:1
Chordata	Actinopteri	Centrarchiformes	Percichthyidae	Percilia	Percilia irwini	NC_024846.1	16621	4A:62, 5A:23, 6A:2, 7A:3	4T:75, 5T:27, 6T:6, 7T:1, 8T:1	4C:82, 5C:35, 6C:11, 7C:3, 12C:1	4G:29, 5G:11, 6G:1
Chordata	Actinopteri	Centrarchiformes	Percichthyidae	Bostockia	Bostockia porosa	NC_024847.1	16477	4A:73, 5A:31, 6A:6, 7A:1	4T:75, 5T:30, 6T:10, 7T:4, 11T:1	4C:81, 5C:37, 6C:16, 7C:1, 10C:1	4G:18, 5G:11, 7G:2
Chordata	Actinopteri	Centrarchiformes	Percichthyidae	Gadopsis	Gadopsis bispinosus	NC_024848.1	16440	4A:84, 5A:33, 6A:6, 7A:1, 8A:1	4T:65, 5T:19, 6T:4, 7T:2, 10T:1	4C:54, 5C:19, 6C:4, 7C:3	4G:10, 5G:8
Chordata	Actinopteri	Centrarchiformes	Percichthyidae	Macquaria	Macquaria ambigua	NC_024849.1	16502	4A:67, 5A:30, 6A:6	4T:48, 5T:16, 6T:5, 7T:1	4C:75, 5C:53, 6C:15	4G:14, 5G:7, 6G:1
Chordata	Actinopteri	Centrarchiformes	Percichthyidae	Nannoperca	Nannoperca variegata	NC_024851.1	16503	4A:68, 5A:30, 6A:4, 7A:1	4T:59, 5T:20, 6T:7, 7T:3, 8T:1, 10T:1	4C:79, 5C:38, 6C:13	4G:26, 5G:15
Chordata	Actinopteri	Acropomatiformes	Howellidae	Howella	Howella brodiei	NC_024852.1	16518	4A:63, 5A:21, 6A:4, 7A:1	4T:52, 5T:18, 6T:2, 8T:1	4C:91, 5C:50, 6C:15, 10C:1, 13C:1	4G:24, 5G:11
Chordata	Actinopteri	Centrarchiformes	Terapontidae	Bidyanus	Bidyanus bidyanus	NC_024854.1	16869	4A:65, 5A:26, 6A:7, 7A:3	4T:37, 5T:15, 6T:2	4C:72, 5C:50, 6C:23, 7C:1	4G:19, 5G:9
Arthropoda	Insecta	Diptera	Scathophagidae	Scathophaga	Scathophaga stercoraria	NC_024856.1	16223	4A:143, 5A:80, 6A:21, 7A:11, 8A:5, 9A:2, 10A:1, 18A:1	4T:171, 5T:59, 6T:31, 7T:4, 8T:7, 9T:2, 16T:1	4C:8, 5C:1	4G:1
Chordata	Actinopteri	Centrarchiformes	Cirrhitidae	Cirrhitichthys	Cirrhitichthys aprinus	NC_024857.1	17034	4A:55, 5A:22, 6A:4, 7A:4	4T:78, 5T:28, 6T:6, 7T:3, 8T:3, 9T:1	4C:72, 5C:32, 6C:19	4G:31, 5G:16, 6G:1, 7G:1
Chordata	Actinopteri	Centrarchiformes	Cheilodactylidae	Cheilodactylus	Cheilodactylus zonatus	NC_024858.1	16661	4A:72, 5A:23, 6A:7	4T:37, 5T:19, 6T:2, 7T:2	4C:88, 5C:47, 6C:7, 7C:3	4G:11, 5G:17
Arthropoda	Insecta	Lepidoptera	Nymphalidae	Euploea	Euploea midamus	NC_024863.1	15187	4A:126, 5A:45, 6A:31, 7A:13, 8A:4, 9A:2, 10A:3, 11A:2	4T:169, 5T:67, 6T:38, 7T:14, 8T:9, 9T:3, 10T:2, 11T:1, 12T:2, 17T:1	4C:12, 5C:9, 6C:3	4G:1, 5G:1
Arthropoda	Arachnida	Araneae	Salticidae	Plexippus	Plexippus paykulli	NC_024877.1	14316	4A:72, 5A:15, 6A:4, 7A:2, 8A:1, 9A:1	4T:134, 5T:60, 6T:27, 7T:10, 8T:10, 9T:2	4C:4, 5C:2	4G:19, 5G:7, 6G:2, 7G:1
Arthropoda	Arachnida	Araneae	Selenopidae	Selenops	Selenops bursarius	NC_024878.1	14272	4A:77, 5A:23, 6A:3, 7A:2, 8A:2, 9A:1, 11A:1	4T:153, 5T:80, 6T:27, 7T:12, 8T:10, 9T:2, 10T:1	4C:4, 5C:2	4G:13, 5G:6, 6G:1, 7G:1
Chordata	Actinopteri	Atheriniformes	Atherinopsidae	Chirostoma	Chirostoma humboldtianum	NC_024883.1	16447	4A:38, 5A:17, 8A:1	4T:32, 5T:17, 6T:1, 7T:1, 9T:1	4C:86, 5C:55, 6C:16, 7C:1	4G:28, 5G:18, 6G:1
Chordata	Actinopteri	Pleuronectiformes	Bothidae	Arnoglossus	Arnoglossus polyspilus	AP014586.1	17439	4A:37, 5A:11, 6A:1, 7A:1, 9A:1	4T:46, 5T:16, 6T:1, 9T:1	4C:95, 5C:60, 6C:12, 7C:4, 12C:1	4G:43, 5G:17, 6G:2
Chordata	Actinopteri	Pleuronectiformes	Soleidae	Heteromycteris	Heteromycteris japonicus	NC_024921.1	17111	4A:70, 5A:33, 6A:3, 7A:5	4T:65, 5T:11, 6T:6, 7T:1, 8T:1	4C:73, 5C:26, 6C:10	4G:28, 5G:10
Arthropoda	Insecta	Hemiptera	Aphididae	Cervaphis	Cervaphis quercus	NC_024926.1	15272	4A:193, 5A:105, 6A:37, 7A:21, 8A:11, 9A:12, 10A:4, 11A:3, 12A:3, 13A:1, 16A:1, 22A:1, 25A:1, 33A:1	4T:169, 5T:69, 6T:34, 7T:11, 8T:9, 9T:2, 12T:1	4C:5, 6C:1, 7C:1	4G:2, 12G:1
Nematoda	Chromadorea	Rhabditida	Philometridae	Philometroides	Philometroides sanguineus	NC_024931.1	14378	4A:62, 5A:24, 6A:6, 7A:2, 8A:1, 9A:1, 11A:1	4T:223, 5T:96, 6T:55, 7T:21, 8T:2	4C:1	4G:26, 5G:5, 6G:1
Chordata	Mammalia	Primates	Cercopithecidae	Chlorocebus	Chlorocebus cynosuros	NC_024933.1	16334	4A:68, 5A:36, 6A:5, 7A:4, 8A:1	4T:34, 5T:8, 6T:4	4C:75, 5C:30, 6C:10, 7C:5, 10C:1, 11C:1	4G:9, 5G:4, 6G:1
Mollusca	Gastropoda	Stylommatophora	Camaenidae	Mastigeulota	Mastigeulota kiangsinensis	NC_024935.1	14029	4A:61, 5A:19, 6A:8, 7A:4, 8A:1	4T:127, 5T:50, 6T:19, 7T:17, 8T:3, 9T:1, 10T:2	4C:11, 5C:1, 6C:1	4G:42, 5G:11, 6G:3, 7G:2, 8G:1
Chordata	Chondrichthyes	Rhinopristiformes	Rhinobatidae	Zapteryx	Zapteryx exasperata	NC_024937.1	17310	4A:92, 5A:39, 6A:8, 7A:2, 8A:1, 14A:1	4T:77, 5T:27, 6T:9, 7T:4	4C:52, 5C:21, 6C:5, 7C:2	4G:7, 5G:7, 6G:1, 7G:1
Chordata	Actinopteri	Pleuronectiformes	Bothidae	Bothus	Bothus pantherinus	NC_024947.1	17271	4A:33, 5A:7, 6A:4	4T:33, 5T:10, 6T:2	4C:84, 5C:53, 6C:13, 7C:6, 9C:1	4G:48, 5G:24, 6G:5
Chordata	Actinopteri	Pleuronectiformes	Citharidae	Citharoides	Citharoides macrolepidotus	NC_024948.1	16497	4A:65, 5A:24, 6A:5, 7A:2, 8A:1	4T:32, 5T:7, 6T:5, 7T:1	4C:86, 5C:51, 6C:22, 7C:2, 8C:2	4G:25, 5G:10, 6G:2
Chordata	Actinopteri	Pleuronectiformes	Bothidae	Crossorhombus	Crossorhombus kobensis	NC_024949.1	16696	4A:44, 5A:12, 6A:1	4T:54, 5T:18, 6T:3, 7T:1	4C:71, 5C:25, 6C:12, 7C:2	4G:32, 5G:8, 6G:3
Chordata	Actinopteri	Pleuronectiformes	Cyclopsettidae	Cyclopsetta	Cyclopsetta fimbriata	NC_024950.1	16506	4A:55, 5A:20, 6A:3, 7A:1	4T:40, 5T:17, 6T:1, 10T:1	4C:68, 5C:40, 6C:10	4G:18, 5G:11, 6G:1
Chordata	Actinopteri	Pleuronectiformes	Bothidae	Laeops	Laeops lanceolata	NC_024951.1	18436	4A:47, 5A:16, 6A:2	4T:39, 5T:16, 6T:8, 7T:1	4C:81, 5C:43, 6C:18, 7C:6, 8C:4, 9C:1, 10C:1	4G:52, 5G:14, 6G:3
Chordata	Actinopteri	Pleuronectiformes	Citharidae	Lepidoblepharon	Lepidoblepharon ophthalmolepis	NC_024952.1	16805	4A:60, 5A:35, 6A:8, 7A:4, 8A:4	4T:47, 5T:15, 6T:6, 7T:5, 11T:1	4C:90, 5C:54, 6C:15, 7C:3, 9C:1, 10C:1	4G:40, 5G:16, 6G:8, 7G:2
Chordata	Actinopteri	Pleuronectiformes	Rhombosoleidae	Neoachiropsetta	Neoachiropsetta milfordi	NC_024953.1	16623	4A:48, 5A:18, 6A:1, 7A:1	4T:46, 5T:13, 6T:2, 10T:1	4C:74, 5C:40, 6C:18, 7C:2	4G:35, 5G:16, 6G:3
Cnidaria	Anthozoa	Scleractinia	Agariciidae	Agaricia	Agaricia fragilis	KM051016.1	18667	4A:86, 5A:20, 6A:5, 7A:2, 8A:1, 9A:1	4T:162, 5T:82, 6T:38, 7T:16, 8T:10, 9T:4, 10T:3, 11T:1, 12T:1, 15T:1	4C:25, 5C:13, 6C:1	4G:89, 5G:41, 6G:16, 7G:8, 8G:3
Arthropoda	Insecta	Orthoptera	Dericorythidae	Eozubovskya	Eozubovskya planicaudata	KM211573.1	15830	4A:181, 5A:72, 6A:31, 7A:14, 8A:5	4T:106, 5T:28, 6T:10, 7T:2	4C:8, 5C:1, 6C:2	4G:8, 5G:3
Arthropoda	Malacostraca	Decapoda	Mictyridae	Mictyris	Mictyris longicarpus	LN611670.1	15548	4A:93, 5A:37, 6A:12, 7A:9, 8A:3	4T:144, 5T:48, 6T:23, 7T:14, 8T:7, 9T:3	4C:29, 5C:5, 6C:2	4G:10, 5G:1
Arthropoda	Insecta	Coleoptera	Phengodidae	Brasilocerus	Brasilocerus sp.	KJ938490.1	14458	4A:166, 5A:84, 6A:48, 7A:22, 8A:9, 9A:4, 10A:4, 11A:2, 12A:1	4T:75, 5T:18, 6T:12, 7T:1, 8T:1	4C:16, 5C:5, 6C:1	5G:1
Arthropoda	Insecta	Coleoptera	Elateridae	Teslasena	Teslasena femoralis	KJ938491.1	15331	4A:162, 5A:80, 6A:36, 7A:22, 8A:9, 9A:2, 10A:3, 11A:3, 15A:1	4T:83, 5T:28, 6T:6, 8T:2	4C:34, 5C:9, 6C:1	4G:7, 5G:2
Arthropoda	Hexanauplia	Cyclopoida	Lernaeidae	Lernaea	Lernaea cyprinacea	NC_025239.1	14656	4A:103, 5A:43, 6A:17, 7A:10, 8A:4, 9A:1, 10A:1	4T:116, 5T:44, 6T:25, 7T:9, 8T:3, 9T:1	4C:21, 5C:6, 6C:6, 9C:2	4G:10, 5G:4
Arthropoda	Insecta	Coleoptera	Cerambycidae	Aeolesthes	Aeolesthes oenochrous	NC_025243.1	15747	4A:156, 5A:64, 6A:29, 7A:14, 8A:7, 9A:1	4T:104, 5T:39, 6T:9, 7T:3, 8T:3, 9T:1, 13T:1, 14T:1	4C:27, 5C:9, 6C:1	4G:4
Arthropoda	Insecta	Neuroptera	Myrmeleontidae	Myrmeleon	Myrmeleon immanis	KM216750.1	15802	4A:131, 5A:61, 6A:22, 7A:10, 8A:3, 9A:3, 10A:1	4T:129, 5T:38, 6T:10, 7T:2, 8T:3, 9T:2, 12T:1	4C:15, 5C:5, 6C:3, 7C:1	4G:5, 5G:4
Arthropoda	Arachnida	Araneae	Lycosidae	Pirata	Pirata subpiraticus	KM486623.1	14528	4A:90, 5A:32, 6A:4, 7A:8, 8A:2, 9A:1	4T:156, 5T:75, 6T:42, 7T:14, 8T:13, 9T:5, 10T:1, 11T:1, 12T:1	4C:6, 5C:2, 6C:1	4G:20, 5G:8, 6G:1, 7G:4
Platyhelminthes	Trematoda	Plagiorchiida	Dicrocoeliidae	Dicrocoelium	Dicrocoelium dendriticum	NC_025280.1	14884	4A:15, 5A:10, 6A:2, 7A:1	4T:169, 5T:70, 6T:26, 7T:13, 8T:8, 10T:1, 11T:1, 12T:1, 14T:1, 15T:1	4C:6	4G:57, 5G:13, 6G:3, 7G:1
Arthropoda	Insecta	Megaloptera	Corydalidae	Neochauliodes	Neochauliodes fraternus	NC_025282.1	15768	4A:123, 5A:56, 6A:25, 7A:9, 8A:6, 11A:1	4T:171, 5T:61, 6T:17, 7T:13, 8T:9, 10T:1, 12T:1	4C:20, 5C:6, 6C:1	4G:6, 5G:3
Chordata	Mammalia	Rodentia	Cricetidae	Lasiopodomys	Lasiopodomys mandarinus	NC_025283.1	16375	4A:62, 5A:36, 6A:7, 7A:3	4T:41, 5T:15	4C:50, 5C:20, 6C:4, 13C:1	4G:12, 5G:3, 7G:1, 10G:1
Arthropoda	Insecta	Hymenoptera	Trigonalidae	Orthogonalys	Orthogonalys pulchella	NC_025289.1	17277	4A:176, 5A:69, 6A:37, 7A:18, 8A:7, 9A:4, 12A:1	4T:226, 5T:104, 6T:35, 7T:17, 8T:12, 9T:7, 11T:1	4C:2, 5C:1	4G:14, 5G:2, 6G:6, 8G:1
Nematoda	Chromadorea	Rhabditida	Aphelenchoididae	Aphelenchoides	Aphelenchoides besseyi	NC_025291.1	16216	4A:43, 5A:48, 6A:24, 7A:4, 8A:1, 9A:1, 10A:1, 13A:1	4T:296, 5T:148, 6T:73, 7T:53, 8T:36, 9T:19, 10T:11, 11T:8, 12T:12, 13T:3, 14T:3, 15T:4, 16T:1, 17T:1, 21T:1, 22T:1, 23T:1	4C:1, 5C:2	4G:14, 5G:11, 6G:1
Chordata	Mammalia	Carnivora	Viverridae	Viverricula	Viverricula indica	NC_025296.1	16583	4A:78, 5A:43, 6A:9, 7A:5, 8A:2	4T:51, 5T:10, 6T:6, 7T:1	4C:54, 5C:13, 6C:2, 8C:1	4G:8, 5G:3
Chordata	Actinopteri	Cypriniformes	Balitoridae	Metahomaloptera	Metahomaloptera omeiensis	NC_025297.1	16558	4A:75, 5A:21, 6A:7, 7A:3	4T:54, 5T:16, 6T:2, 7T:1	4C:75, 5C:40, 6C:10	4G:26, 5G:9, 6G:2
Arthropoda	Insecta	Hemiptera	Tingidae	Pseudacysta	Pseudacysta perseae	NC_025299.1	15850	4A:172, 5A:67, 6A:43, 7A:18, 8A:8, 9A:3	4T:129, 5T:34, 6T:12, 7T:6, 8T:6	4C:14, 5C:1, 6C:1	4G:3, 5G:2, 10G:1
Arthropoda	Malacostraca	Decapoda	Nephropidae	Metanephrops	Metanephrops sibogae	NC_025323.1	20677	4A:178, 5A:73, 6A:24, 7A:10, 8A:6, 11A:2	4T:172, 5T:61, 6T:17, 7T:9, 8T:3, 9T:1, 20T:1, 23T:1	4C:63, 5C:26, 6C:3	4G:16, 5G:2, 6G:2
Arthropoda	Malacostraca	Decapoda	Ocypodidae	Ocypode	Ocypode ceratophthalmus	NC_025324.1	15564	4A:98, 5A:33, 6A:16, 7A:5, 8A:3, 9A:1	4T:136, 5T:40, 6T:16, 7T:2, 8T:2, 9T:1	4C:25, 5C:7, 6C:4	4G:7, 5G:5
Arthropoda	Insecta	Hemiptera	Peloridiidae	Hemiodoecus	Hemiodoecus leai	NC_025329.1	15949	4A:160, 5A:58, 6A:22, 7A:10, 8A:6, 9A:3, 10A:1	4T:65, 5T:12, 6T:8, 7T:1, 8T:1, 10T:1	4C:43, 5C:17, 6C:9, 7C:1, 11C:1, 13C:1	4G:9, 5G:2, 6G:2
Arthropoda	Insecta	Coleoptera	Tenebrionidae	Ulomoides	Ulomoides dermestoides	NC_025332.1	15434	4A:156, 5A:88, 6A:37, 7A:14, 8A:9, 9A:5, 10A:4	4T:83, 5T:29, 6T:12, 7T:2, 8T:3, 9T:1, 13T:1	4C:26, 5C:14, 6C:1, 7C:1	4G:2, 5G:1
Mollusca	Gastropoda	Architaenioglossa	Ampullariidae	Marisa	Marisa cornuarietis	NC_025334.1	15923	4A:77, 5A:34, 6A:8, 7A:1, 8A:1	4T:224, 5T:89, 6T:35, 7T:16, 8T:6, 9T:1	4C:12	4G:27, 5G:3
Porifera	Demospongiae	Tetractinellida	Vulcanellidae	Poecillastra	Poecillastra laminaris	NC_025335.1	18413	4A:81, 5A:18, 6A:9, 7A:3, 8A:1, 9A:1	4T:149, 5T:67, 6T:23, 7T:8, 8T:11, 9T:1, 10T:1	4C:15, 5C:4, 6C:1, 7C:1	4G:74, 5G:29, 6G:7, 8G:1
Chordata	Actinopteri	Atheriniformes	Atherinopsidae	Basilichthys	Basilichthys microlepidotus	KM245937.1	16543	4A:50, 5A:18, 6A:4, 7A:1	4T:56, 5T:25, 6T:7, 7T:1	4C:82, 5C:34, 6C:14	4G:24, 5G:10, 6G:2
Chordata	Actinopteri	Ephippiformes	Drepaneidae	Drepane	Drepane punctata	KM273123.1	23152	4A:98, 5A:38, 6A:10, 7A:1, 8A:1	4T:35, 5T:19, 6T:2, 8T:2	4C:124, 5C:69, 6C:23, 7C:5, 12C:1, 14C:1	4G:20, 5G:17
Arthropoda	Insecta	Ephemeroptera	Ameletidae	Ameletus	Ameletus sp.	KM244682.1	15141	4A:128, 5A:42, 6A:8, 7A:2	4T:102, 5T:53, 6T:13, 7T:2	4C:13, 5C:2	4G:35, 5G:10, 6G:2
Chordata	Actinopteri	Cichliformes	Cichlidae	Andinoacara	Andinoacara rivulatus	LC009435.1	16585	4A:58, 5A:28, 6A:4, 7A:1	4T:84, 5T:19, 6T:9, 7T:3, 8T:1, 12T:1	4C:70, 5C:29, 6C:5, 7C:1, 8C:1	4G:21, 5G:13, 6G:5
Arthropoda	Insecta	Orthoptera	Acrididae	Indopodisma	Indopodisma kingdoni	KM068093.1	15626	4A:164, 5A:75, 6A:28, 7A:15, 8A:8, 9A:1	4T:99, 5T:27, 6T:13, 9T:1	4C:8, 5C:3	4G:4, 5G:1
Arthropoda	Insecta	Orthoptera	Acrididae	Qinlingacris	Qinlingacris elaeodes	KM068095.1	15221	4A:163, 5A:68, 6A:28, 7A:17, 8A:4, 9A:3, 10A:1	4T:94, 5T:29, 6T:6, 7T:5, 8T:1, 9T:1	4C:8, 5C:1, 6C:2	4G:2, 5G:2, 7G:2
Cnidaria	Anthozoa	Scleractinia	Caryophylliidae	Solenosmilia	Solenosmilia variabilis	NC_025472.1	15968	4A:70, 5A:32, 6A:13, 7A:11, 8A:4, 9A:1, 10A:1, 11A:1	4T:214, 5T:106, 6T:49, 7T:27, 8T:23, 9T:14, 10T:9, 11T:3, 12T:1, 13T:1, 14T:1	4C:21, 5C:4	4G:70, 5G:25, 6G:8, 7G:1, 8G:1, 9G:1, 10G:1
Arthropoda	Insecta	Hemiptera	Cercopidae	Aeneolamia	Aeneolamia contigua	NC_025495.1	15613	4A:167, 5A:95, 6A:34, 7A:22, 8A:14, 9A:4, 10A:7, 11A:3, 13A:1, 18A:2, 23A:1	4T:62, 5T:19, 6T:11, 7T:3, 8T:1	4C:8, 5C:2	4G:3
Mollusca	Gastropoda	Stylommatophora	Camaenidae	Camaena	Camaena cicatricosa	NC_025511.1	13843	4A:69, 5A:23, 6A:3, 7A:4, 8A:3, 9A:1	4T:141, 5T:50, 6T:19, 7T:13, 8T:2, 10T:1	4C:9, 5C:3	4G:19, 5G:5, 6G:1, 7G:1
Arthropoda	Malacostraca	Decapoda	Mithracidae	Damithrax	Damithrax spinosissimus	NC_025518.1	15817	4A:99, 5A:39, 6A:21, 7A:8, 8A:3, 10A:1	4T:145, 5T:62, 6T:28, 7T:11, 8T:5	4C:27, 5C:8, 6C:2, 7C:1, 10C:1	4G:3, 5G:1
Chordata	Mammalia	Rodentia	Sciuridae	Callosciurus	Callosciurus erythraeus	NC_025550.1	16550	4A:81, 5A:25, 6A:9, 7A:3	4T:49, 5T:15, 6T:4, 7T:1	4C:61, 5C:21, 6C:3, 7C:1	4G:6, 5G:4, 6G:1
Arthropoda	Insecta	Lepidoptera	Nymphalidae	Hamadryas	Hamadryas epinome	NC_025551.1	15207	4A:131, 5A:50, 6A:21, 7A:12, 8A:2, 9A:3, 10A:3, 11A:2, 12A:1	4T:164, 5T:78, 6T:29, 7T:17, 8T:8, 9T:2, 10T:5, 11T:3, 17T:1, 19T:1	4C:11, 5C:11, 6C:1	4G:1
Chordata	Hyperoartia	Petromyzontiformes	Petromyzontidae	Ichthyomyzon	Ichthyomyzon unicuspis	NC_025553.1	16163	4A:86, 5A:24, 6A:12, 7A:6, 8A:3, 9A:1	4T:75, 5T:23, 6T:5, 7T:2, 8T:1	4C:49, 5C:23, 6C:4, 7C:1	4G:11, 5G:1
Arthropoda	Arachnida	Araneae	Thomisidae	Oxytate	Oxytate striatipes	NC_025557.1	14407	4A:122, 5A:47, 6A:13, 7A:5, 8A:1, 9A:1, 20A:1	4T:180, 5T:90, 6T:39, 7T:17, 8T:11, 9T:3, 10T:2, 28T:1	4C:5, 5C:2	4G:12, 5G:3, 7G:1
Chordata	Mammalia	Eulipotyphla	Soricidae	Neomys	Neomys fodiens	NC_025559.1	17260	4A:85, 5A:33, 6A:6, 7A:2	4T:88, 5T:19, 6T:3, 7T:1	4C:57, 5C:15, 6C:2, 7C:1	4G:6, 5G:3, 7G:1
Chordata	Actinopteri	Carangiformes	Carangidae	Megalaspis	Megalaspis cordyla	NC_025565.1	16566	4A:79, 5A:18, 6A:5, 7A:1	4T:45, 5T:19, 6T:5	4C:80, 5C:35, 6C:13, 7C:1	4G:13, 5G:8
Arthropoda	Insecta	Lepidoptera	Crambidae	Tyspanodes	Tyspanodes hypsalis	NC_025569.1	15329	4A:152, 5A:56, 6A:23, 7A:11, 8A:2, 9A:4, 11A:5, 13A:1, 14A:1	4T:176, 5T:67, 6T:22, 7T:16, 8T:12, 9T:4, 10T:2, 11T:2, 13T:1, 15T:1, 17T:1	4C:12, 5C:5, 6C:2	4G:3, 5G:2, 6G:1
Arthropoda	Malacostraca	Decapoda	Varunidae	Cyclograpsus	Cyclograpsus granulosus	NC_025571.1	16300	4A:107, 5A:40, 6A:14, 7A:4, 8A:3, 10A:1	4T:167, 5T:57, 6T:23, 7T:13, 8T:5, 9T:1	4C:43, 5C:20, 6C:5, 7C:1	4G:7, 5G:2, 6G:2, 7G:1
Arthropoda	Malacostraca	Decapoda	Porcellanidae	Petrolisthes	Petrolisthes haswelli	NC_025572.1	15348	4A:120, 5A:41, 6A:19, 7A:12, 8A:5, 9A:1, 10A:3	4T:146, 5T:66, 6T:18, 7T:6, 8T:10, 9T:3, 10T:1, 11T:1	4C:27, 5C:4, 9C:1	4G:2, 5G:1, 6G:1
Chordata	Actinopteri	Siluriformes	Doradidae	Platydoras	Platydoras armatulus	NC_025585.1	16470	4A:80, 5A:31, 6A:3, 7A:1	4T:43, 5T:8, 6T:2, 7T:1	4C:64, 5C:22, 6C:11	4G:13, 5G:14
Chordata	Actinopteri	Salmoniformes	Salmonidae	Hucho	Hucho hucho	NC_025589.1	16751	4A:59, 5A:20, 6A:3	4T:45, 5T:24, 6T:1, 7T:1, 14T:1	4C:68, 5C:47, 6C:11, 8C:1	4G:19, 5G:11, 6G:2
Arthropoda	Malacostraca	Decapoda	Enoplometopidae	Enoplometopus	Enoplometopus debelius	NC_025592.1	15641	4A:115, 5A:42, 6A:15, 7A:10, 8A:8	4T:113, 5T:51, 6T:17, 7T:5, 8T:1	4C:17, 5C:5, 6C:2	4G:2
Chordata	Actinopteri	Gobiiformes	Gobiidae	Ponticola	Ponticola kessleri	NC_025638.1	16890	4A:68, 5A:24, 6A:8	4T:76, 5T:32, 6T:8, 7T:5, 8T:2, 10T:1	4C:85, 5C:39, 6C:15, 7C:6	4G:21, 5G:14, 6G:1, 8G:1
Chordata	Mammalia	Rodentia	Muridae	Leopoldamys	Leopoldamys edwardsi	NC_025670.1	16284	4A:90, 5A:42, 6A:15, 7A:5, 8A:2	4T:49, 5T:9, 6T:4, 7T:1	4C:50, 5C:21, 6C:2, 7C:1	4G:12, 5G:5
Arthropoda	Malacostraca	Decapoda	Diogenidae	Clibanarius	Clibanarius infraspinatus	LN626968.1	16504	4A:136, 5A:52, 6A:16, 7A:13, 8A:8, 9A:1	4T:132, 5T:45, 6T:17, 7T:13, 8T:3, 9T:1, 11T:1	4C:35, 5C:16, 6C:7	4G:16, 6G:2
Arthropoda	Insecta	Hymenoptera	Monomachidae	Monomachus	Monomachus antipodalis	KM104168.1	14066	4A:141, 5A:54, 6A:28, 7A:11, 8A:6, 9A:2, 10A:2, 11A:2, 12A:3	4T:172, 5T:74, 6T:36, 7T:14, 8T:4, 9T:3, 10T:1, 11T:2	4C:2	4G:11, 5G:2, 6G:1, 7G:2
Chordata	Lepidosauria	Squamata	Gekkonidae	Phelsuma	Phelsuma guimbeaui	AB661664.1	17533	4A:79, 5A:31, 6A:5, 7A:5, 8A:2	4T:48, 5T:19, 6T:7	4C:62, 5C:15, 6C:6, 7C:3	4G:13, 5G:4
Chordata	Lepidosauria	Squamata	Gekkonidae	Tropiocolotes	Tropiocolotes steudneri	AB738944.1	15863	4A:70, 5A:26, 6A:6, 7A:4	4T:32, 5T:13, 6T:3, 7T:1	4C:65, 5C:19, 6C:9, 7C:4, 8C:2, 11C:1	4G:15, 5G:4, 8G:1
Chordata	Lepidosauria	Squamata	Gekkonidae	Lepidodactylus	Lepidodactylus lugubris	AB738945.1	16762	4A:81, 5A:24, 6A:3, 7A:2	4T:45, 5T:9, 6T:3, 7T:2, 8T:1	4C:74, 5C:25, 6C:13, 7C:4, 8C:1	4G:19, 5G:9, 6G:4, 8G:1
Chordata	Lepidosauria	Squamata	Gekkonidae	Uroplatus	Uroplatus ebenaui	AB738950.1	16830	4A:74, 5A:21, 6A:2, 7A:1	4T:61, 5T:26, 6T:9, 7T:2, 8T:3, 9T:2	4C:68, 5C:24, 6C:13, 7C:2, 8C:4	4G:23, 5G:10, 6G:2, 7G:3, 8G:1
Chordata	Lepidosauria	Squamata	Gekkonidae	Stenodactylus	Stenodactylus petrii	AB738952.1	18672	4A:82, 5A:31, 6A:7, 7A:5, 8A:1	4T:46, 5T:14, 6T:4, 7T:1	4C:91, 5C:30, 6C:25, 7C:6, 9C:1	4G:12, 5G:6
Arthropoda	Insecta	Odonata	Libellulidae	Hydrobasileus	Hydrobasileus croceus	NC_025758.1	15088	4A:144, 5A:54, 6A:30, 7A:15, 8A:2, 9A:2, 10A:1	4T:105, 5T:32, 6T:14, 7T:4, 8T:2	4C:17, 5C:1	4G:5, 5G:3
Arthropoda	Insecta	Lepidoptera	Zygaenidae	Rhodopsona	Rhodopsona rubiginosa	NC_025761.1	15248	4A:148, 5A:65, 6A:23, 7A:16, 8A:4, 9A:4, 10A:2, 11A:2, 13A:2	4T:171, 5T:63, 6T:25, 7T:18, 8T:6, 9T:5, 11T:1, 20T:1	4C:19, 5C:19, 6C:1	4G:4, 5G:5
Arthropoda	Insecta	Orthoptera	Acrididae	Pseudoxya	Pseudoxya diminuta	NC_025765.1	15541	4A:158, 5A:79, 6A:28, 7A:18, 8A:8, 9A:5, 10A:2	4T:88, 5T:31, 6T:14, 7T:4, 8T:2, 11T:1	4C:10, 5C:1	4G:4, 5G:1, 6G:1
Echinodermata	Asteroidea	Forcipulatida	Asteriidae	Aphelasterias	Aphelasterias japonica	NC_025766.1	16215	4A:120, 5A:33, 6A:14, 7A:5, 9A:2	4T:129, 5T:51, 6T:20, 7T:14, 8T:5, 9T:4, 10T:1	4C:52, 5C:11, 6C:3, 7C:4, 8C:1	4G:19, 6G:1, 10G:1
Chordata	Actinopteri	Cypriniformes	Cyprinidae	Procypris	Procypris mera	NC_025770.1	16581	4A:86, 5A:31, 6A:7, 7A:2	4T:51, 5T:6, 6T:2, 7T:2	4C:55, 5C:27, 6C:5	4G:15, 5G:5
Arthropoda	Insecta	Lepidoptera	Noctuidae	Striacosta	Striacosta albicosta	NC_025774.1	15553	4A:144, 5A:53, 6A:23, 7A:18, 8A:2, 9A:5, 10A:3, 11A:2, 12A:1	4T:137, 5T:57, 6T:21, 7T:10, 8T:6, 9T:5, 10T:2, 11T:4, 13T:1, 21T:1	4C:23, 5C:8, 6C:5, 7C:2	4G:6, 5G:4, 7G:2
Chordata	Actinopteri	Perciformes	Percidae	Gymnocephalus	Gymnocephalus cernua	NC_025785.1	16614	4A:60, 5A:23, 6A:2, 7A:1	4T:55, 5T:17, 6T:6, 7T:1, 11T:1	4C:84, 5C:40, 6C:8, 7C:1	4G:20, 5G:13
Chordata	Aves	Apodiformes	Trochilidae	Chrysolampis	Chrysolampis mosquitus	NC_025786.1	16767	4A:75, 5A:28, 6A:9, 7A:4	4T:26, 5T:9, 6T:2, 7T:1, 8T:1	4C:64, 5C:31, 6C:12, 7C:4	4G:9, 5G:3, 6G:2
Arthropoda	Insecta	Blattodea	Rhinotermitidae	Prorhinotermes	Prorhinotermes canalifrons	KP026256.1	15717	4A:139, 5A:61, 6A:20, 7A:10, 8A:6, 9A:2	4T:23, 5T:4	4C:41, 5C:15, 6C:1, 7C:1	4G:12, 5G:10, 6G:3, 7G:1
Arthropoda	Insecta	Blattodea	Rhinotermitidae	Dolichorhinotermes	Dolichorhinotermes longilabius	KP026258.1	15915	4A:189, 5A:82, 6A:27, 7A:20, 8A:9, 9A:2	4T:38, 5T:5, 6T:3, 8T:1	4C:23, 5C:5, 7C:1	4G:6, 5G:1
Arthropoda	Insecta	Blattodea	Termopsidae	Hodotermopsis	Hodotermopsis sjostedti	KP026259.1	15133	4A:160, 5A:69, 6A:32, 7A:12, 8A:7, 9A:3, 10A:1, 13A:1, 14A:1	4T:62, 5T:22, 6T:6, 7T:1, 10T:1	4C:19, 5C:5, 6C:1	4G:8, 5G:2
Arthropoda	Insecta	Blattodea	Serritermitidae	Serritermes	Serritermes serrifer	KP026264.1	14783	4A:151, 5A:80, 6A:21, 7A:13, 8A:4, 9A:1, 10A:1	4T:26, 5T:6, 6T:1	4C:48, 5C:9, 6C:1	4G:20, 5G:4
Arthropoda	Insecta	Blattodea	Termitidae	Ancistrotermes	Ancistrotermes pakistanicus	KP026267.1	15299	4A:162, 5A:82, 6A:24, 7A:13, 8A:4, 9A:2	4T:13, 5T:2	4C:25, 5C:9, 6C:6	4G:8, 5G:3, 6G:2
Arthropoda	Insecta	Blattodea	Termitidae	Leptomyxotermes	Leptomyxotermes doriae	KP026276.1	15262	4A:148, 5A:86, 6A:21, 7A:13, 8A:7, 9A:2	4T:41, 5T:11, 6T:1	4C:24, 5C:10, 6C:9, 7C:1	4G:11, 5G:2, 6G:1
Arthropoda	Insecta	Blattodea	Termitidae	Acanthotermes	Acanthotermes acanthothorax	KP026280.1	15231	4A:159, 5A:74, 6A:22, 7A:18, 8A:9, 9A:4	4T:26, 5T:7	4C:29, 5C:10, 6C:3, 7C:1	4G:11, 5G:1, 6G:2
Arthropoda	Insecta	Blattodea	Termitidae	Basidentitermes	Basidentitermes aurivillii	KP026281.1	15246	4A:156, 5A:71, 6A:17, 7A:17, 8A:5, 9A:1, 10A:1	4T:40, 5T:6, 6T:3, 7T:2	4C:13, 5C:4, 6C:4	4G:11, 5G:3
Arthropoda	Insecta	Blattodea	Kalotermitidae	Rugitermes	Rugitermes sp.	KP026284.1	15699	4A:169, 5A:74, 6A:31, 7A:19, 8A:8, 9A:3, 10A:1	4T:65, 5T:11, 6T:5, 7T:2, 8T:3, 11T:1	4C:22, 5C:6, 6C:1	4G:9, 5G:1
Arthropoda	Insecta	Blattodea	Termitidae	Caetetermes	Caetetermes taquarussu	KP026285.1	15216	4A:154, 5A:74, 6A:22, 7A:15, 8A:4, 9A:1, 10A:1	4T:32, 5T:9, 6T:1	4C:32, 5C:9, 6C:6, 7C:2	4G:9, 5G:1
Arthropoda	Insecta	Blattodea	Termitidae	Orthognathotermes	Orthognathotermes aduncus	KP026289.1	15713	4A:142, 5A:64, 6A:12, 7A:8, 8A:10, 9A:1	4T:30, 5T:5, 6T:1	4C:25, 5C:8, 6C:4, 7C:1	4G:9, 5G:3, 6G:1
Arthropoda	Insecta	Blattodea	Termitidae	Syntermes	Syntermes spinosus	KP026293.1	14945	4A:174, 5A:68, 6A:22, 7A:9, 8A:4, 10A:1	4T:23, 5T:6, 6T:2	4C:25, 5C:8, 6C:3	4G:7, 5G:3, 6G:1
Arthropoda	Insecta	Blattodea	Rhinotermitidae	Parrhinotermes	Parrhinotermes browni	KP026295.1	15211	4A:155, 5A:76, 6A:30, 7A:21, 8A:12, 9A:2, 11A:1	4T:27, 5T:15, 6T:5, 9T:1	4C:21, 5C:14, 6C:4, 7C:1	4G:7, 5G:2
Arthropoda	Insecta	Blattodea	Rhinotermitidae	Termitogeton	Termitogeton planus	KP026298.1	14951	4A:166, 5A:64, 6A:27, 7A:22, 8A:12, 9A:4	4T:18, 5T:3, 6T:3	4C:37, 5C:15, 6C:3, 7C:1	4G:14, 5G:4, 6G:1
Arthropoda	Insecta	Blattodea	Kalotermitidae	Glyptotermes	Glyptotermes sp.	KP026301.1	15101	4A:150, 5A:68, 6A:24, 7A:9, 8A:5, 9A:5, 10A:1	4T:34, 5T:8, 6T:2, 7T:1	4C:34, 5C:15, 6C:3	4G:8, 5G:4
Chordata	Chondrichthyes	Myliobatiformes	Myliobatidae	Rhinoptera	Rhinoptera steindachneri	KM364982.1	15719	4A:70, 5A:36, 6A:8, 7A:2	4T:50, 5T:21, 6T:3	4C:43, 5C:17, 6C:6	4G:8, 5G:3
Chordata	Chondrichthyes	Myliobatiformes	Myliobatidae	Myliobatis	Myliobatis californica	KM364985.1	15708	4A:71, 5A:38, 6A:5, 7A:2, 8A:1	4T:56, 5T:16, 6T:2, 7T:1	4C:69, 5C:31, 6C:5, 7C:1	4G:19, 5G:11, 6G:3
Chordata	Chondrichthyes	Myliobatiformes	Myliobatidae	Mobula	Mobula thurstoni	KM364993.1	15719	4A:79, 5A:33, 6A:9, 7A:2, 8A:1	4T:56, 5T:14, 6T:1, 7T:1	4C:39, 5C:18, 6C:6	4G:11, 5G:3
Chordata	Mammalia	Perissodactyla	Equidae	Hippidion	Hippidion saldiasi	KM881679.1	16639	4A:50, 5A:18, 6A:3, 7A:1	4T:19, 5T:2, 7T:1	4C:42, 5C:12, 6C:2, 7C:1	4G:7, 5G:3, 6G:1
Arthropoda	Insecta	Orthoptera	Pamphagidae	Asiotmethis	Asiotmethis jubatus	NC_025904.1	15669	4A:136, 5A:74, 6A:29, 7A:11, 8A:10, 9A:2	4T:78, 5T:12, 6T:2, 7T:1, 8T:2, 17T:1	4C:23, 5C:3, 7C:1	4G:7, 6G:1
Arthropoda	Insecta	Neuroptera	Myrmeleontidae	Epacanthaclisis	Epacanthaclisis banksi	NC_025905.1	15870	4A:140, 5A:69, 6A:23, 7A:11, 8A:3, 9A:3, 10A:2	4T:110, 5T:37, 6T:10, 7T:2, 8T:3	4C:21, 5C:5, 6C:1, 7C:1	4G:5, 5G:1
Chordata	Aves	Pelecaniformes	Ardeidae	Ardea	Ardea purpurea	NC_025919.1	18722	4A:86, 5A:30, 6A:7, 7A:3, 8A:1	4T:37, 5T:7, 6T:3, 7T:2	4C:76, 5C:34, 6C:7, 7C:1, 8C:2, 9C:3	4G:17, 5G:3
Chordata	Aves	Pelecaniformes	Ardeidae	Ardeola	Ardeola bacchus	NC_025921.1	19341	4A:101, 5A:37, 6A:7, 7A:6	4T:25, 5T:8, 6T:2, 7T:2	4C:76, 5C:45, 6C:7, 7C:5, 10C:1	4G:12, 5G:2
Chordata	Aves	Pelecaniformes	Ardeidae	Butorides	Butorides striata	NC_025922.1	19087	4A:105, 5A:31, 6A:7, 7A:3, 8A:1	4T:26, 5T:10, 6T:3, 7T:2	4C:77, 5C:30, 6C:8, 7C:4	4G:11, 5G:2
Chordata	Aves	Pelecaniformes	Ardeidae	Botaurus	Botaurus stellaris	NC_025923.1	20350	4A:129, 5A:50, 6A:7, 7A:3	4T:52, 5T:10, 6T:2	4C:86, 5C:42, 6C:14, 7C:7, 8C:1	4G:9, 5G:3, 6G:1
Chordata	Aves	Passeriformes	Corvidae	Pyrrhocorax	Pyrrhocorax graculus	NC_025927.1	16905	4A:66, 5A:27, 6A:7, 7A:2	4T:35, 5T:17, 8T:1	4C:52, 5C:21, 6C:6, 7C:3, 8C:1	4G:13, 5G:2
Chordata	Actinopteri	Mugiliformes	Mugilidae	Oedalechilus	Oedalechilus labiosus	NC_025941.1	16829	4A:70, 5A:23, 6A:5, 7A:3, 8A:1	4T:46, 5T:11, 6T:1, 10T:1	4C:86, 5C:38, 6C:13	4G:16, 5G:6
Chordata	Chondrichthyes	Rajiformes	Arhynchobatidae	Atlantoraja	Atlantoraja castelnaui	NC_025942.1	16750	4A:69, 5A:43, 6A:11, 7A:1, 14A:1	4T:71, 5T:15, 6T:6, 7T:6	4C:36, 5C:7, 6C:4	4G:8, 5G:2, 6G:1
Arthropoda	Insecta	Orthoptera	Acrididae	Angaracris	Angaracris rhodopa	NC_025946.1	15930	4A:164, 5A:85, 6A:37, 7A:13, 8A:4, 9A:1	4T:77, 5T:24, 6T:6, 7T:1	4C:10	4G:3
Arthropoda	Insecta	Lepidoptera	Praydidae	Prays	Prays oleae	NC_025948.1	16499	4A:156, 5A:59, 6A:25, 7A:24, 8A:8, 9A:4, 10A:5, 11A:3, 12A:1, 13A:1, 14A:1	4T:166, 5T:70, 6T:28, 7T:23, 8T:6, 9T:7, 10T:3, 11T:1, 12T:1, 19T:1	4C:15, 5C:9, 6C:2, 7C:1	4G:6, 5G:4, 6G:1, 7G:1
Chordata	Actinopteri	Characiformes	Prochilodontidae	Ichthyoelephas	Ichthyoelephas longirostris	NC_025950.1	16840	4A:59, 5A:31, 6A:5, 7A:1, 8A:1	4T:53, 5T:7, 6T:1, 7T:1, 8T:1	4C:76, 5C:31, 6C:14	4G:17, 5G:10
Chordata	Actinopteri	Characiformes	Curimatidae	Curimata	Curimata mivartii	NC_025951.1	16705	4A:84, 5A:32, 6A:8, 7A:1	4T:65, 5T:20, 6T:5, 7T:4	4C:82, 5C:27, 6C:10, 7C:2	4G:11, 5G:3
Chordata	Actinopteri	Chaetodontiformes	Chaetodontidae	Chelmon	Chelmon rostratus	NC_025953.1	16538	4A:62, 5A:36, 6A:11, 7A:2, 8A:1	4T:50, 5T:22, 6T:6	4C:66, 5C:32, 6C:7, 8C:1	4G:23, 5G:8, 6G:1
Arthropoda	Malacostraca	Decapoda	Parastacidae	Paranephrops	Paranephrops planifrons	NC_025957.1	16174	4A:120, 5A:44, 6A:19, 7A:11, 8A:6, 9A:1	4T:110, 5T:43, 6T:20, 7T:6, 8T:1	4C:62, 5C:21, 6C:12, 7C:1	4G:12, 5G:5, 6G:3, 7G:2
Arthropoda	Malacostraca	Decapoda	Nephropidae	Nephrops	Nephrops norvegicus	NC_025958.1	16132	4A:120, 5A:49, 6A:21, 7A:7	4T:154, 5T:67, 6T:23, 7T:8, 8T:1, 9T:1, 10T:1	4C:16, 5C:6, 6C:2	4G:12, 5G:1
Mollusca	Bivalvia	Cardiida	Tellinidae	Macoma	Macoma balthica	KM373205.1	15594	4A:30, 5A:12, 6A:1, 8A:1	4T:136, 5T:65, 6T:22, 7T:7, 8T:5, 9T:1	4C:8, 5C:2, 6C:2	4G:60, 5G:16, 6G:5, 7G:3, 8G:1
Arthropoda	Insecta	Hymenoptera	Colletidae	Colletes	Colletes gigas	KM978210.1	15885	4A:172, 5A:76, 6A:26, 7A:7, 8A:3, 9A:2, 10A:1, 11A:1, 13A:1	4T:201, 5T:77, 6T:34, 7T:6, 8T:5, 9T:3		4G:2
Chordata	Aves	Psittaciformes	Psittacidae	Guaruba	Guaruba guarouba	NC_026031.1	17008	4A:78, 5A:33, 6A:6, 7A:1	4T:20, 5T:5, 6T:2, 7T:1	4C:88, 5C:45, 6C:11, 7C:6, 8C:1	4G:18, 5G:3, 6G:1
Mollusca	Gastropoda	Stylommatophora	Pupillidae	Gastrocopta	Gastrocopta cristata	NC_026043.1	14060	4A:92, 5A:38, 6A:13, 7A:5, 8A:5, 9A:1, 10A:1	4T:152, 5T:90, 6T:25, 7T:20, 8T:7, 9T:1	4C:10, 5C:2, 6C:1, 7C:1	4G:33, 5G:10, 6G:3, 7G:1, 8G:1
Mollusca	Gastropoda	Stylommatophora	Pupillidae	Pupilla	Pupilla muscorum	NC_026044.1	14149	4A:91, 5A:48, 6A:12, 7A:7, 8A:3, 9A:1	4T:172, 5T:87, 6T:36, 7T:18, 8T:7, 9T:3, 10T:2	4C:12, 6C:1	4G:28, 5G:4, 6G:3
Mollusca	Gastropoda	Stylommatophora	Vertiginidae	Vertigo	Vertigo pusilla	NC_026045.1	14078	4A:103, 5A:39, 6A:12, 7A:5, 8A:3, 9A:1	4T:172, 5T:78, 6T:33, 7T:25, 8T:8, 9T:3	4C:9, 5C:2	4G:19, 5G:3, 6G:2
Arthropoda	Insecta	Odonata	Euphaeidae	Euphaea	Euphaea ornata	NC_026059.1	15863	4A:154, 5A:76, 6A:48, 7A:20, 8A:4, 9A:3	4T:85, 5T:21, 6T:5, 7T:2, 8T:1	4C:26, 5C:14, 6C:4, 7C:1	4G:13, 5G:3, 6G:2
Arthropoda	Insecta	Lepidoptera	Nymphalidae	Callerebia	Callerebia suroia	NC_026060.1	15208	4A:148, 5A:46, 6A:29, 7A:13, 8A:4, 9A:7, 10A:2, 11A:2, 12A:1, 14A:1	4T:176, 5T:82, 6T:31, 7T:16, 8T:10, 9T:3, 10T:2, 11T:3, 12T:1, 13T:1, 19T:1, 20T:1	4C:24, 5C:11, 6C:2, 8C:1	4G:4, 5G:1
Arthropoda	Insecta	Lepidoptera	Nymphalidae	Elymnias	Elymnias hypermnestra	NC_026061.1	15167	4A:139, 5A:50, 6A:22, 7A:10, 8A:3, 11A:1, 13A:1	4T:183, 5T:74, 6T:34, 7T:19, 8T:11, 9T:3, 10T:4, 11T:1, 18T:1	4C:14, 5C:17, 6C:3	4G:4, 5G:5
Arthropoda	Insecta	Lepidoptera	Nymphalidae	Cyrestis	Cyrestis thyodamas	NC_026071.1	15254	4A:123, 5A:56, 6A:23, 7A:11, 8A:7, 9A:2, 10A:2, 11A:1	4T:155, 5T:60, 6T:30, 7T:13, 8T:11, 9T:4, 10T:2, 11T:2, 12T:1, 13T:1, 19T:1	4C:25, 5C:7, 6C:3	4G:5, 5G:4, 7G:1
Arthropoda	Insecta	Zoraptera	Zorotypidae	Zorotypus	Zorotypus medoensis	NC_026077.1	14572	4A:102, 5A:58, 6A:21, 7A:7, 8A:4, 9A:1, 10A:1	4T:100, 5T:33, 6T:8, 7T:2, 8T:2	4C:47, 5C:15, 6C:4, 7C:1, 8C:1	4G:7, 5G:3, 7G:1
Mollusca	Bivalvia	Arcoida	Arcidae	Tegillarca	Tegillarca granosa	NC_026081.1	31589	4A:127, 5A:58, 6A:25, 7A:7, 8A:3, 9A:1, 11A:1	4T:251, 5T:127, 6T:52, 7T:21, 8T:8, 9T:3, 10T:1, 11T:2, 14T:1	4C:19, 5C:3, 6C:3	4G:115, 5G:34, 6G:13, 7G:5
Arthropoda	Arachnida	Trombidiformes	Demodicidae	Demodex	Demodex folliculorum	NC_026102.1	14150	4A:173, 5A:88, 6A:52, 7A:32, 8A:18, 9A:11, 10A:3, 11A:4, 12A:3, 26A:1	4T:62, 5T:23, 6T:4, 7T:1, 8T:1	4C:45, 5C:20, 6C:5	4G:7, 5G:2
Chordata	Ascidiacea	Aplousobranchia	Didemnidae	Didemnum	Didemnum vexillum	NC_026107.1	13424	4A:90, 5A:45, 6A:20, 7A:8, 8A:6, 9A:3, 10A:3, 14A:1	4T:195, 5T:92, 6T:49, 7T:36, 8T:24, 9T:11, 10T:12, 11T:6, 12T:3, 13T:1, 15T:1, 18T:1	4C:2	4G:1
Arthropoda	Arachnida	Araneae	Lycosidae	Wadicosa	Wadicosa fidelis	NC_026123.1	14741	4A:79, 5A:30, 6A:4, 7A:3, 8A:3, 9A:1	4T:154, 5T:85, 6T:43, 7T:15, 8T:10, 9T:4, 10T:2, 11T:3, 15T:1	4C:7	4G:20, 5G:4, 7G:3
Arthropoda	Insecta	Hymenoptera	Formicidae	Myrmica	Myrmica scabrinodis	NC_026133.1	15310	4A:136, 5A:48, 6A:25, 7A:6, 8A:12, 9A:3, 10A:1	4T:167, 5T:76, 6T:32, 7T:18, 8T:9, 9T:5, 10T:3	4C:11, 5C:1, 6C:2	4G:7, 5G:5
Chordata	Mammalia	Artiodactyla	Delphinidae	Sotalia	Sotalia guianensis	KM893424.1	16388	4A:87, 5A:57, 6A:26, 7A:17, 8A:15, 9A:5, 10A:5, 11A:1, 12A:1, 13A:3, 15A:1, 19A:1, 24A:1	4T:145, 5T:58, 6T:38, 7T:17, 8T:12, 9T:7, 10T:1, 11T:5, 12T:1	4C:65, 5C:32, 6C:14, 7C:3, 8C:4, 9C:2, 10C:1, 12C:1, 13C:1	4G:26, 5G:13, 6G:2, 7G:3, 8G:1, 10G:1
Chordata	Mammalia	Artiodactyla	Delphinidae	Orcaella	Orcaella brevirostris	KM893427.1	16359	4A:77, 5A:44, 6A:16, 7A:8, 8A:8, 10A:2, 11A:4, 12A:1, 13A:1, 14A:2, 16A:1	4T:133, 5T:50, 6T:35, 7T:12, 8T:11, 9T:2, 10T:3, 12T:1	4C:35, 5C:19, 6C:7, 7C:1, 8C:2, 9C:2, 10C:1	4G:23, 5G:17, 6G:5, 7G:2, 8G:1
Chordata	Actinopteri	Chaetodontiformes	Leiognathidae	Nuchequula	Nuchequula nuchalis	AB355911.1	15965	4A:66, 5A:25, 6A:9, 7A:2, 8A:1	4T:53, 5T:14, 6T:2, 7T:3, 8T:1	4C:88, 5C:37, 6C:14, 7C:3, 8C:1, 9C:1	4G:16, 5G:2, 6G:1
Chordata	Actinopteri	Lutjaniformes	Haemulidae	Diagramma	Diagramma picta	AB355914.1	16530	4A:62, 5A:24, 6A:5, 7A:1	4T:40, 5T:11	4C:77, 5C:59, 6C:6, 7C:2	4G:29, 5G:11, 6G:4
Chordata	Actinopteri	Spariformes	Centracanthidae	Spicara	Spicara maena	AB355915.1	16638	4A:62, 5A:25, 6A:8, 7A:1	4T:57, 5T:19, 6T:7, 7T:4, 8T:2	4C:80, 5C:37, 6C:8, 7C:2, 8C:1, 11C:1, 13C:1	4G:22, 5G:9, 6G:2, 22G:1
Chordata	Actinopteri	Spariformes	Lethrinidae	Lethrinus	Lethrinus obsoletus	AB355916.1	16779	4A:61, 5A:28, 6A:3, 7A:1	4T:42, 5T:10, 6T:2, 8T:1	4C:87, 5C:41, 6C:13	4G:18, 5G:8, 6G:3
Cnidaria	Anthozoa	Scleralcyonacea	Coralliidae	Sibogagorgia	Sibogagorgia cauliflora	NC_026193.1	19030	4A:62, 5A:16, 6A:4	4T:90, 5T:24, 6T:10, 8T:1	4C:45, 5C:16	4G:46, 5G:18, 6G:5, 7G:1
Chordata	Actinopteri	Characiformes	Acestrorhamphidae	Grundulus	Grundulus bogotensis	NC_026195.1	17123	4A:86, 5A:34, 6A:9, 7A:2	4T:107, 5T:16, 6T:14, 7T:5, 9T:1	4C:61, 5C:19, 6C:4, 7C:3, 10C:1	4G:16, 5G:4, 6G:3
Arthropoda	Insecta	Trichoptera	Limnephilidae	Limnephilus	Limnephilus decipiens	NC_026219.1	16667	4A:172, 5A:84, 6A:18, 7A:21, 8A:6, 10A:1	4T:174, 5T:80, 6T:29, 7T:14, 8T:9, 9T:6, 10T:2, 11T:1	4C:26, 5C:12, 6C:5	4G:9, 5G:4
Chordata	Aves	Passeriformes	Paridae	Periparus	Periparus ater	NC_026223.1	16783	4A:71, 5A:28, 6A:3, 7A:2, 8A:1	4T:15, 5T:7, 6T:4, 7T:1, 10T:1	4C:84, 5C:45, 6C:17, 7C:2, 8C:4, 9C:1, 10C:1	4G:8, 5G:4, 6G:1
Chordata	Actinopteri	Chaetodontiformes	Leiognathidae	Gazza	Gazza minuta	NC_026232.1	16475	4A:75, 5A:29, 6A:9, 7A:4	4T:43, 5T:13, 6T:3, 8T:1, 11T:1	4C:81, 5C:45, 6C:16, 7C:6, 8C:2, 10C:2, 13C:1	4G:24, 5G:9, 6G:1
Chordata	Actinopteri	Lobotiformes	Lobotidae	Lobotes	Lobotes surinamensis	NC_026233.1	16782	4A:57, 5A:21, 6A:6, 7A:2, 8A:2	4T:55, 5T:13, 6T:3, 7T:1, 8T:1	4C:69, 5C:19, 6C:15, 7C:2	4G:26, 5G:10, 6G:2
Chordata	Actinopteri	Gerreiformes	Gerreidae	Gerres	Gerres oyena	NC_026234.1	16839	4A:59, 5A:23, 6A:5, 7A:1	4T:43, 5T:15, 6T:5, 8T:1	4C:78, 5C:36, 6C:9, 7C:1, 12C:1	4G:22, 5G:9, 6G:1
Chordata	Actinopteri	Acropomatiformes	Pempheridae	Pempheris	Pempheris schwenkii	NC_026237.1	16516	4A:63, 5A:13, 6A:7, 7A:1, 8A:1	4T:45, 5T:14, 6T:5, 7T:1	4C:84, 5C:47, 6C:14, 7C:3, 17C:1	4G:24, 5G:6
Porifera	Hexactinellida	Lyssacinosida	Euplectellidae	Hertwigia	Hertwigia falcifera	KM580071.1	15514	4A:169, 5A:68, 6A:29, 7A:12, 8A:3, 9A:2	4T:54, 5T:15, 6T:6, 7T:4, 8T:2	4C:30, 5C:6, 6C:4	4G:3
Nematoda	Chromadorea	Rhabditida	Panagrolaimidae	Halicephalobus	Halicephalobus gingivalis	KM192363.1	13735	4A:80, 5A:28, 6A:12, 7A:3, 8A:1, 10A:1	4T:283, 5T:154, 6T:72, 7T:49, 8T:28, 9T:12, 10T:5, 11T:5, 12T:1, 13T:1	5C:1	4G:4, 5G:1
Arthropoda	Insecta	Odonata	Libellulidae	Brachythemis	Brachythemis contaminata	NC_026305.1	15056	4A:145, 5A:55, 6A:28, 7A:11, 8A:5, 9A:4	4T:95, 5T:30, 6T:4, 7T:3, 8T:1, 9T:1	4C:18, 5C:6, 6C:1	4G:8, 5G:4, 6G:2
Chordata	Chondrichthyes	Rhinopristiformes	Pristidae	Anoxypristis	Anoxypristis cuspidata	NC_026307.1	17243	4A:84, 5A:37, 6A:11, 7A:5, 8A:1, 33A:1	4T:57, 5T:14, 6T:3, 9T:1	4C:57, 5C:16, 6C:8, 7C:1	4G:6, 5G:3, 8G:1
Arthropoda	Malacostraca	Amphipoda	Acanthogammaridae	Brachyuropus	Brachyuropus grewingkii	NC_026309.1	17118	4A:93, 5A:45, 6A:15, 7A:8, 8A:3, 10A:2, 12A:1	4T:112, 5T:32, 6T:14, 7T:5, 8T:2, 9T:2, 11T:1, 14T:1	4C:54, 5C:24, 6C:5	4G:17, 5G:4, 6G:2, 9G:1
Chordata	Aves	Psittaciformes	Psittacidae	Deroptyus	Deroptyus accipitrinus	KM611476.1	14931	4A:66, 5A:22, 6A:4, 7A:1	4T:19, 5T:2, 6T:1	4C:82, 5C:33, 6C:11, 7C:3, 8C:1, 12C:1	4G:14, 5G:5
Chordata	Aves	Psittaciformes	Psittacidae	Pionites	Pionites leucogaster	KM611479.1	10532	4A:41, 5A:14, 6A:4, 7A:2	4T:9, 5T:1	4C:48, 5C:23, 6C:8, 7C:5	4G:9, 5G:2, 6G:1
Chordata	Aves	Psittaciformes	Psittacidae	Tanygnathus	Tanygnathus lucionensis	KM611480.1	14209	4A:66, 5A:23, 6A:7, 7A:3	4T:8, 5T:1	4C:79, 5C:32, 6C:10, 7C:5, 12C:1	4G:14, 5G:2, 6G:1
Nematoda	Chromadorea	Rhabditida	Cephalobidae	Acrobeles	Acrobeles complexus	KM192361.1	14780	4A:29, 5A:15, 6A:3, 7A:2	4T:167, 5T:71, 6T:18, 7T:8, 8T:2	4C:13, 5C:7	4G:35, 5G:13, 6G:3
Arthropoda	Thecostraca	Balanomorpha	Balanidae	Balanus	Balanus balanus	NC_026466.1	15955	4A:127, 5A:70, 6A:22, 7A:14, 8A:3, 10A:2	4T:134, 5T:45, 6T:16, 7T:4, 8T:7, 12T:1	4C:34, 5C:1, 6C:3, 7C:1, 8C:1, 9C:1	4G:3, 5G:2
Arthropoda	Insecta	Lepidoptera	Nymphalidae	Stichophthalma	Stichophthalma louisa	KP247523.1	15721	4A:137, 5A:52, 6A:32, 7A:9, 8A:5, 9A:2, 11A:1, 13A:1	4T:152, 5T:80, 6T:37, 7T:16, 8T:10, 9T:3, 10T:2, 11T:1, 19T:1	4C:22, 5C:13, 6C:3, 7C:3	4G:6, 5G:5, 8G:1
Acanthocephala	Palaeacanthocephala	Polymorphida	Polymorphidae	Southwellina	Southwellina hispida	NC_026516.1	14742	4A:31, 5A:11, 6A:1	4T:173, 5T:62, 6T:19, 7T:7	4C:6, 5C:4, 6C:2, 7C:1	4G:114, 5G:49, 6G:21
Arthropoda	Insecta	Lepidoptera	Lycaenidae	Japonica	Japonica lutea	NC_026517.1	15225	4A:135, 5A:46, 6A:19, 7A:10, 8A:4, 9A:3, 11A:1	4T:175, 5T:76, 6T:41, 7T:12, 8T:10, 9T:3, 10T:2, 13T:1, 19T:1	4C:5, 5C:7, 6C:1	4G:1
Arthropoda	Insecta	Orthoptera	Pamphagidae	Sinotmethis	Sinotmethis brachypterus	NC_026525.1	15662	4A:158, 5A:74, 6A:31, 7A:9, 8A:10, 9A:2, 10A:1	4T:70, 5T:19, 6T:5, 8T:2, 10T:1, 16T:1	4C:21, 5C:3, 6C:1	4G:6, 5G:2
Cnidaria	Anthozoa	Scleractinia	Agariciidae	Pavona	Pavona decussata	NC_026527.1	18378	4A:76, 5A:21, 6A:6, 7A:2, 8A:1	4T:168, 5T:77, 6T:38, 7T:15, 8T:9, 9T:3, 10T:3, 11T:1, 12T:1	4C:29, 5C:11, 6C:1	4G:96, 5G:43, 6G:13, 7G:8, 8G:4
Chordata	Actinopteri	Cypriniformes	Catostomidae	Ictiobus	Ictiobus cyprinellus	NC_026528.1	16611	4A:60, 5A:27, 6A:4, 7A:1	4T:45, 5T:13	4C:68, 5C:27, 6C:10, 7C:1	4G:18, 5G:5
Chordata	Actinopteri	Cichliformes	Cichlidae	Pterophyllum	Pterophyllum scalare	NC_026535.1	16491	4A:75, 5A:35, 6A:8, 7A:2	4T:67, 5T:15, 6T:11, 7T:3, 12T:1	4C:76, 5C:51, 6C:14, 7C:3, 8C:1	4G:28, 5G:8, 6G:1, 7G:1
Chordata	Aves	Galliformes	Phasianidae	Crossoptilon	Crossoptilon mantchuricum	NC_026548.1	16690	4A:70, 5A:36, 6A:7, 7A:3	4T:38, 5T:7, 6T:4, 8T:1	4C:81, 5C:35, 6C:11, 7C:2, 8C:1, 13C:1	4G:18, 5G:4, 6G:1, 7G:1, 9G:1
Arthropoda	Chilopoda	Geophilomorpha	Linotaeniidae	Strigamia	Strigamia maritima	NC_026557.1	14983	4A:150, 5A:82, 6A:22, 7A:19, 8A:2, 9A:4, 10A:3	4T:71, 5T:30, 6T:15, 7T:4, 8T:1	4C:68, 5C:42, 6C:20, 7C:5, 8C:2	4G:23, 5G:5, 6G:3, 7G:1
Chordata	Actinopteri	Osmeriformes	Osmeridae	Hypomesus	Hypomesus olidus	NC_026566.1	16786	4A:47, 5A:17, 6A:4	4T:58, 5T:14, 6T:5, 7T:1, 10T:1	4C:81, 5C:42, 6C:7	4G:37, 5G:20
Arthropoda	Insecta	Lepidoptera	Nymphalidae	Chitoria	Chitoria ulupi	NC_026569.1	15279	4A:138, 5A:50, 6A:19, 7A:8, 8A:4, 9A:3, 10A:2, 11A:1, 14A:1	4T:159, 5T:72, 6T:30, 7T:11, 8T:10, 9T:4, 10T:4, 21T:1	4C:17, 5C:13, 6C:3	4G:4, 5G:2
Chordata	Actinopteri	Perciformes	Bathydraconidae	Parachaenichthys	Parachaenichthys charcoti	NC_026578.1	18202	4A:65, 5A:20, 6A:3	4T:58, 5T:18, 6T:1, 7T:6, 9T:3, 10T:1	4C:115, 5C:71, 6C:19, 7C:1, 9C:3, 10C:4, 11C:1, 12C:1, 13C:1, 14C:1, 15C:1	4G:39, 5G:16, 6G:4, 7G:1, 9G:1
Chordata	Actinopteri	Cyprinodontiformes	Poeciliidae	Poecilia	Poecilia sphenops	NC_026579.1	16533	4A:84, 5A:30, 6A:3, 7A:2, 8A:1, 9A:1	4T:68, 5T:15, 6T:2, 7T:3	4C:86, 5C:43, 6C:13, 7C:1, 8C:1	4G:17, 5G:5, 6G:2
Chordata	Actinopteri	Anabantiformes	Osphronemidae	Betta	Betta splendens	NC_026581.1	16980	4A:73, 5A:33, 6A:16, 7A:5	4T:111, 5T:29, 6T:15, 7T:6, 8T:4, 9T:1	4C:65, 5C:26, 6C:9, 7C:4, 8C:1, 10C:1, 11C:1	4G:21, 5G:10, 6G:1
Mollusca	Cephalopoda	Myopsida	Loliginidae	Doryteuthis	Doryteuthis opalescens	KP336703.1	17370	4A:121, 5A:66, 6A:21, 7A:8, 8A:3	4T:91, 5T:43, 6T:11, 7T:3, 8T:4	4C:43, 5C:14, 6C:6	4G:6, 5G:2, 7G:1
Arthropoda	Insecta	Trichoptera	Sericostomatidae	Sericostoma	Sericostoma personatum	KP455290.1	15260	4A:149, 5A:71, 6A:36, 7A:14, 8A:6, 9A:2, 10A:1, 11A:2	4T:126, 5T:52, 6T:27, 7T:9, 8T:5	4C:28, 5C:22, 6C:3, 7C:1, 8C:1	4G:3, 5G:2, 6G:1
Arthropoda	Insecta	Trichoptera	Uenoidae	Thremma	Thremma gallicum	KP455291.1	15343	4A:155, 5A:65, 6A:25, 7A:23, 8A:5, 9A:3, 11A:1, 13A:1	4T:179, 5T:63, 6T:21, 7T:17, 8T:10, 9T:6, 10T:2	4C:14, 5C:4, 6C:3	4G:5, 5G:1, 6G:1
Arthropoda	Arachnida	Araneae	Araneidae	Cyrtophora	Cyrtophora moluccensis	KM820884.1	14344	4A:137, 5A:80, 6A:17, 7A:10, 8A:6, 9A:1, 12A:1	4T:133, 5T:65, 6T:24, 7T:9, 8T:6, 9T:2, 10T:1, 11T:2, 19T:1	4C:3, 5C:1, 7C:1	4G:18, 5G:6, 6G:2, 7G:3
Arthropoda	Insecta	Coleoptera	Phengodidae	Phrixothrix	Phrixothrix hirtus	KM923891.1	20919	4A:186, 5A:92, 6A:47, 7A:31, 8A:13, 9A:12, 10A:10, 11A:3, 12A:1, 14A:1, 16A:1	4T:161, 5T:54, 6T:23, 7T:5, 8T:4, 9T:1, 10T:1	4C:26, 5C:4, 6C:1, 7C:1	4G:3
Arthropoda	Arachnida	Mesostigmata	Phytoseiidae	Euseius	Euseius nicholsi	KM999989.1	15524	4A:133, 5A:49, 6A:21, 7A:8, 8A:2, 9A:1	4T:241, 5T:101, 6T:36, 7T:16, 8T:3, 9T:2, 11T:1	4C:3, 5C:1	4G:14, 5G:2, 6G:1, 8G:1
Chordata	Aves	Gruiformes	Rallidae	Fulica	Fulica atra	KP313718.1	17030	4A:87, 5A:33, 6A:7, 7A:7	4T:30, 5T:14, 6T:2, 7T:2, 8T:2, 9T:1	4C:67, 5C:37, 6C:8, 7C:4	4G:7, 5G:3, 6G:1
Arthropoda	Insecta	Hemiptera	Reduviidae	Peirates	Peirates lepturoides	NC_026672.1	15932	4A:164, 5A:67, 6A:35, 7A:20, 8A:5, 9A:2	4T:83, 5T:28, 6T:9, 7T:1	4C:20, 5C:9, 7C:1	4G:12, 5G:2, 6G:1, 13G:1
Arthropoda	Malacostraca	Decapoda	Raninidae	Umalia	Umalia orientalis	NC_026688.1	15466	4A:96, 5A:29, 6A:9, 7A:4, 8A:6, 10A:1	4T:118, 5T:38, 6T:17, 7T:7, 8T:1, 9T:1	4C:35, 5C:5, 6C:2, 7C:1	4G:9, 5G:6
Chordata	Actinopteri	Cichliformes	Cichlidae	Symphysodon	Symphysodon discus	NC_026689.1	16544	4A:74, 5A:35, 6A:8, 7A:1	4T:57, 5T:16, 6T:7, 7T:1, 8T:1, 11T:1	4C:92, 5C:46, 6C:12, 7C:1	4G:11, 5G:7, 6G:1
Arthropoda	Insecta	Lepidoptera	Erebidae	Lemyra	Lemyra melli	NC_026692.1	15418	4A:141, 5A:60, 6A:21, 7A:15, 8A:2, 9A:2, 10A:1, 11A:2, 13A:1	4T:145, 5T:77, 6T:35, 7T:11, 8T:4, 9T:3, 10T:2, 11T:1, 12T:1, 13T:1, 18T:1	4C:29, 5C:17, 6C:3	4G:12, 5G:7, 6G:2
Chordata	Actinopteri	Cypriniformes	Xenocyprididae	Hemiculterella	Hemiculterella sauvagei	NC_026693.1	16618	4A:71, 5A:20, 6A:4, 7A:1	4T:42, 5T:14, 7T:1	4C:61, 5C:25, 6C:7, 7C:1	4G:19, 5G:10, 6G:3
Arthropoda	Insecta	Lepidoptera	Oecophoridae	Promalactis	Promalactis suzukiella	NC_026697.1	15507	4A:123, 5A:51, 6A:30, 7A:14, 8A:6, 9A:4, 10A:2, 11A:3, 12A:1	4T:171, 5T:78, 6T:32, 7T:18, 8T:13, 9T:4, 10T:3, 11T:1, 18T:1	4C:13, 5C:8	4G:2, 5G:1
Arthropoda	Insecta	Hemiptera	Aetalionidae	Darthula	Darthula hardwickii	NC_026699.1	15355	4A:160, 5A:72, 6A:32, 7A:17, 8A:7, 9A:5, 10A:3, 11A:1, 12A:1, 21A:1	4T:65, 5T:22, 6T:3, 7T:1	4C:10, 5C:1	4G:7
Chordata	Mammalia	Rodentia	Sciuridae	Cynomys	Cynomys ludovicianus	NC_026706.1	16466	4A:79, 5A:32, 6A:5, 7A:1, 9A:1	4T:62, 5T:14, 6T:9, 8T:1	4C:48, 5C:14, 6C:2	4G:10, 5G:2
Chordata	Actinopteri	Synbranchiformes	Mastacembelidae	Sinobdella	Sinobdella sinensis	NC_026709.1	16540	4A:71, 5A:30, 6A:9, 7A:1	4T:47, 5T:12, 6T:2	4C:81, 5C:31, 6C:12, 7C:1	4G:22, 5G:9, 6G:1
Chordata	Actinopteri	Cypriniformes	Xenocyprididae	Pseudolaubuca	Pseudolaubuca sinensis	NC_026712.1	16617	4A:70, 5A:17, 6A:7, 7A:3	4T:48, 5T:16, 7T:2	4C:55, 5C:33, 6C:11, 7C:1	4G:35, 5G:5, 6G:6
Chordata	Actinopteri	Siluriformes	Auchenipteridae	Ageneiosus	Ageneiosus pardalis	NC_026717.1	16484	4A:85, 5A:30, 6A:5, 7A:1	4T:46, 5T:11, 6T:5	4C:70, 5C:27, 6C:17, 7C:3	4G:11, 5G:7, 6G:1
Chordata	Mammalia	Carnivora	Canidae	Urocyon	Urocyon cinereoargenteus	NC_026723.1	16469	4A:70, 5A:30, 6A:8, 7A:4, 8A:1	4T:51, 5T:15, 6T:5, 7T:1, 8T:1	4C:53, 5C:16, 6C:5	4G:15, 5G:5, 7G:1
Arthropoda	Insecta	Diptera	Calliphoridae	Phormia	Phormia regina	NC_026668.1	15513	4A:124, 5A:60, 6A:24, 7A:10, 8A:4, 9A:2, 11A:1, 17A:1	4T:149, 5T:53, 6T:16, 7T:4, 8T:2	4C:9, 5C:5, 6C:1	4G:3
Chordata	Aves	Passeriformes	Paridae	Sylviparus	Sylviparus modestus	NC_026793.1	17086	4A:59, 5A:29, 6A:5, 7A:1	4T:19, 5T:5, 6T:5, 7T:2	4C:78, 5C:36, 6C:15, 7C:1, 8C:3, 9C:1, 11C:1	4G:7, 5G:2
Cnidaria	Scyphozoa	Semaeostomeae	Ulmaridae	Aurelia	Aurelia sp.	LC005414.1	16657	4A:76, 5A:24, 6A:7, 7A:2	4T:120, 5T:55, 6T:13, 7T:4, 8T:2	4C:29, 5C:4, 6C:1	4G:36, 6G:3
Chordata	Actinopteri	Aulopiformes	Giganturidae	Gigantura	Gigantura indica	AP004197.1	16108	4A:40, 5A:9, 6A:5, 7A:2	4T:36, 5T:9, 6T:7	4C:79, 5C:54, 6C:12, 7C:4, 9C:1, 10C:2	4G:33, 5G:14, 6G:2
Chordata	Actinopteri	Aulopiformes	Ipnopidae	Ipnops	Ipnops sp.	AP004198.1	16101	4A:50, 5A:17, 6A:1	4T:58, 5T:21, 6T:6	4C:73, 5C:51, 6C:8, 7C:4	4G:24, 5G:15, 6G:1
Chordata	Actinopteri	Aulopiformes	Scopelarchidae	Scopelarchoides	Scopelarchoides danae	AP004200.1	16245	4A:68, 5A:22, 6A:3, 7A:3	4T:45, 5T:12, 6T:3, 7T:2	4C:94, 5C:50, 6C:12, 7C:2, 8C:1	4G:17, 5G:8, 6G:1
Chordata	Actinopteri	Aulopiformes	Notosudidae	Scopelosaurus	Scopelosaurus hoedti	AP004201.1	16130	4A:61, 5A:17, 6A:8, 7A:3	4T:34, 5T:13, 6T:3, 7T:1, 8T:2	4C:82, 5C:54, 6C:12, 7C:3, 9C:1	4G:26, 5G:10, 6G:2, 7G:1
Chordata	Actinopteri	Aulopiformes	Synodontidae	Synodus	Synodus kaianus	AP004202.1	16024	4A:60, 5A:22, 6A:4, 7A:3	4T:68, 5T:21, 6T:8, 7T:4	4C:84, 5C:43, 6C:13, 7C:4, 9C:2, 10C:2	4G:35, 5G:8, 6G:4, 7G:2
Chordata	Actinopteri	Aulopiformes	Synodontidae	Trachinocephalus	Trachinocephalus myops	AP004203.1	16112	4A:25, 5A:8, 6A:3	4T:60, 5T:27, 6T:9, 7T:3, 8T:2, 10T:1	4C:95, 5C:39, 6C:14, 7C:5, 8C:2, 9C:1	4G:33, 5G:12, 6G:4, 11G:1
Chordata	Actinopteri	Aulopiformes	Bathysauridae	Bathysaurus	Bathysaurus ferox	AP004204.1	16067	4A:41, 5A:16, 6A:7	4T:49, 5T:26, 6T:5, 7T:2, 9T:2	4C:83, 5C:55, 6C:14, 7C:2	4G:22, 5G:11, 6G:3
Chordata	Actinopteri	Aulopiformes	Pseudotrichonotidae	Pseudotrichonotus	Pseudotrichonotus altivelis	AP004205.1	15800	4A:72, 5A:21, 6A:3, 7A:2, 8A:1, 10A:1	4T:48, 5T:11, 6T:2, 8T:1	4C:84, 5C:48, 6C:16, 7C:1, 8C:2, 9C:1, 12C:1	4G:23, 5G:3, 6G:2
Chordata	Actinopteri	Aulopiformes	Paralepididae	Lestidium	Lestidium atlanticum	AP004206.1	17018	4A:63, 5A:21, 6A:7, 7A:3, 8A:1	4T:50, 5T:15, 6T:3, 7T:3, 8T:2, 9T:1	4C:91, 5C:42, 6C:9, 7C:2, 8C:2, 11C:1	4G:29, 5G:11, 6G:2, 7G:2
Chordata	Actinopteri	Aulopiformes	Alepisauridae	Anotopterus	Anotopterus pharao	AP004207.1	16611	4A:72, 5A:26, 6A:6, 7A:1	4T:95, 5T:20, 6T:11, 7T:3	4C:82, 5C:38, 6C:5, 7C:1	4G:18, 5G:6, 6G:2
Chordata	Actinopteri	Aulopiformes	Evermannellidae	Evermannella	Evermannella indica	AP004208.1	16825	4A:39, 5A:16, 6A:7, 7A:1	4T:38, 5T:10, 6T:4, 7T:1, 8T:1	4C:78, 5C:46, 6C:8, 7C:1	4G:34, 5G:12, 6G:3, 8G:1
Chordata	Actinopteri	Aulopiformes	Evermannellidae	Coccorella	Coccorella atlantica	AP004209.1	16445	4A:70, 5A:26, 6A:9, 7A:4	4T:33, 5T:9, 6T:7, 7T:2, 8T:1	4C:97, 5C:42, 6C:12, 7C:2, 8C:1, 9C:1	4G:22, 5G:8, 6G:2
Chordata	Actinopteri	Aulopiformes	Alepisauridae	Omosudis	Omosudis lowii	AP004210.1	16639	4A:58, 5A:32, 6A:6, 7A:5, 8A:2, 9A:1	4T:50, 5T:10, 6T:9, 7T:2	4C:97, 5C:53, 6C:7	4G:24, 5G:11, 6G:3
Chordata	Actinopteri	Aulopiformes	Alepisauridae	Alepisaurus	Alepisaurus ferox	AP004211.1	16194	4A:58, 5A:20, 6A:6, 7A:1	4T:47, 5T:17, 6T:3	4C:97, 5C:60, 6C:5, 7C:2	4G:20, 5G:10, 7G:1
Arthropoda	Insecta	Lepidoptera	Nymphalidae	Ninguta	Ninguta schrenckii	NC_026838.1	15261	4A:136, 5A:48, 6A:26, 7A:7, 8A:3, 9A:4, 10A:4, 11A:1	4T:182, 5T:76, 6T:41, 7T:15, 8T:8, 9T:6, 10T:5, 11T:1, 13T:1, 19T:1	4C:17, 5C:12, 6C:6	4G:2, 5G:3
Arthropoda	Insecta	Lepidoptera	Euteliidae	Eutelia	Eutelia adulatricoides	NC_026840.1	15360	4A:133, 5A:53, 6A:30, 7A:16, 8A:4, 9A:6, 10A:2, 11A:1, 14A:1	4T:165, 5T:65, 6T:31, 7T:14, 8T:7, 9T:3, 10T:3, 11T:2, 15T:1, 18T:1	4C:14, 5C:4, 6C:1	4G:3, 5G:1
Arthropoda	Insecta	Lepidoptera	Nolidae	Risoba	Risoba prominens	NC_026841.1	15343	4A:133, 5A:66, 6A:30, 7A:14, 8A:4, 9A:3, 11A:2	4T:157, 5T:65, 6T:19, 7T:18, 8T:9, 9T:4, 10T:5, 11T:2, 12T:1, 18T:1, 19T:1	4C:13, 5C:6, 6C:4	4G:3, 5G:2
Arthropoda	Insecta	Lepidoptera	Nolidae	Gabala	Gabala argentata	NC_026842.1	15337	4A:129, 5A:55, 6A:27, 7A:12, 8A:4, 9A:3, 10A:2, 11A:1, 12A:2, 13A:2	4T:178, 5T:66, 6T:29, 7T:15, 8T:10, 9T:3, 10T:6, 11T:2, 18T:1	4C:7, 5C:7, 6C:1	4G:1
Arthropoda	Insecta	Lepidoptera	Erebidae	Vamuna	Vamuna virilis	NC_026844.1	15417	4A:139, 5A:57, 6A:24, 7A:17, 8A:3, 9A:3, 10A:1, 11A:2, 12A:1	4T:157, 5T:77, 6T:22, 7T:10, 8T:5, 9T:5, 10T:2, 11T:1, 12T:1, 18T:1	4C:21, 5C:9, 6C:4, 7C:1	4G:3, 5G:1, 6G:1
Mollusca	Polyplacophora	Chitonida	Tonicellidae	Cyanoplax	Cyanoplax caverna	NC_026848.1	15141	4A:136, 5A:65, 6A:37, 7A:20, 8A:8, 9A:4, 10A:2, 11A:1	4T:148, 5T:55, 6T:18, 7T:13, 8T:8, 9T:1, 10T:1	4C:13, 5C:3, 6C:2	4G:5, 5G:2
Mollusca	Polyplacophora	Chitonida	Mopaliidae	Cryptochiton	Cryptochiton stelleri	NC_026850.1	15082	4A:122, 5A:52, 6A:26, 7A:4, 8A:6, 9A:2, 14A:1	4T:136, 5T:71, 6T:30, 7T:14, 8T:7, 10T:1, 11T:1	4C:13, 5C:2	4G:31, 5G:9, 6G:3, 7G:1
Chordata	Amphibia	Caudata	Hynobiidae	Onychodactylus	Onychodactylus zhaoermii	NC_026854.1	16533	4A:105, 5A:55, 6A:10, 7A:6, 8A:5, 10A:1	4T:129, 5T:43, 6T:18, 7T:4, 9T:1, 11T:2, 13T:1, 14T:1	4C:24, 5C:9, 7C:1	4G:7, 5G:6
Chordata	Actinopteri	Perciformes	Hexagrammidae	Ophiodon	Ophiodon elongatus	NC_026887.1	16528	4A:61, 5A:17, 6A:4, 7A:1	4T:57, 5T:17, 6T:1, 7T:1	4C:91, 5C:45, 6C:20	4G:28, 5G:11, 6G:1
Arthropoda	Insecta	Diptera	Psychodidae	Nyssomyia	Nyssomyia umbratilis	NC_026898.1	15757	4A:129, 5A:53, 6A:25, 7A:8, 8A:5, 9A:3	4T:157, 5T:56, 6T:31, 7T:7, 8T:4, 9T:1, 10T:1	4C:17, 5C:6, 6C:3	4G:9, 5G:1
Mollusca	Cephalopoda	Oegopsida	Ommastrephidae	Illex	Illex argentinus	NC_026908.1	20278	4A:166, 5A:47, 6A:24, 7A:19, 8A:6, 10A:1	4T:141, 5T:48, 6T:21, 7T:7, 8T:1	4C:48, 5C:11, 6C:1, 9C:2	4G:9, 5G:3, 7G:1
Chordata	Mammalia	Rodentia	Spalacidae	Myospalax	Myospalax aspalax	NC_026915.1	16436	4A:76, 5A:43, 6A:15, 7A:6, 8A:1, 9A:1, 11A:1	4T:77, 5T:24, 6T:5, 7T:2, 10T:1	4C:41, 5C:11, 6C:6	4G:9, 5G:1
Arthropoda	Insecta	Hymenoptera	Ibaliidae	Ibalia	Ibalia leucospoides	NC_026832.1	17212	4A:178, 5A:73, 6A:27, 7A:15, 8A:12, 9A:2, 10A:2, 11A:3	4T:204, 5T:98, 6T:37, 7T:21, 8T:8, 9T:3, 10T:3, 11T:1	4C:3, 5C:3, 7C:1	4G:3, 5G:1, 6G:1
Chordata	Actinopteri	Siluriformes	Pseudopimelodidae	Lophiosilurus	Lophiosilurus alexandri	NC_026845.1	16445	4A:90, 5A:31, 6A:5, 7A:1	4T:50, 5T:6, 10T:1	4C:76, 5C:23, 6C:9, 7C:1, 8C:1	4G:16, 5G:8
Mollusca	Polyplacophora	Chitonida	Tonicellidae	Nuttallina	Nuttallina californica	NC_026849.1	15604	4A:140, 5A:50, 6A:25, 7A:7, 8A:11, 9A:3, 10A:2	4T:147, 5T:47, 6T:23, 7T:5, 8T:4, 9T:1, 10T:1	4C:26, 5C:7, 6C:3, 7C:1	4G:12, 5G:2
Arthropoda	Arachnida	Araneae	Dictynidae	Argyroneta	Argyroneta aquatica	NC_026863.1	16000	4A:90, 5A:42, 6A:9, 7A:5, 8A:1, 23A:1	4T:182, 5T:91, 6T:35, 7T:25, 8T:10, 10T:1, 15T:1	4C:3, 5C:5, 6C:1	4G:44, 5G:13, 6G:5, 7G:2, 8G:2
Arthropoda	Insecta	Hymenoptera	Pelecinidae	Pelecinus	Pelecinus polyturator	NC_026865.1	14896	4A:130, 5A:59, 6A:22, 7A:17, 8A:6, 9A:3, 10A:1, 11A:1, 12A:1	4T:156, 5T:90, 6T:24, 7T:21, 8T:7, 9T:1, 10T:1, 11T:1	4C:23, 5C:9, 6C:3, 7C:1	4G:5, 5G:5
Mollusca	Bivalvia	Pectinida	Pectinidae	Pecten	Pecten maximus	KP900975.1	17252	4A:30, 5A:17, 6A:5, 7A:3	4T:163, 5T:80, 6T:37, 7T:19, 8T:10, 9T:1, 19T:1	4C:27, 5C:10	4G:92, 5G:36, 6G:12, 7G:8
Chordata	Mammalia	Rodentia	Cricetidae	Allocricetulus	Allocricetulus eversmanni	KP231506.1	16282	4A:67, 5A:25, 6A:4, 7A:2	4T:39, 5T:8, 6T:5, 7T:1	4C:53, 5C:22, 6C:7, 8C:1	4G:13, 5G:4
Chordata	Aves	Strigiformes	Tytonidae	Tyto	Tyto longimembris	KP893332.1	18466	4A:94, 5A:33, 6A:9, 7A:2, 8A:1	4T:39, 5T:17, 6T:9, 7T:2, 8T:4, 11T:1	4C:79, 5C:38, 6C:11, 7C:7, 8C:4, 13C:1	4G:21, 5G:2, 6G:2, 7G:1
Arthropoda	Insecta	Hemiptera	Cicadellidae	Nephotettix	Nephotettix cincticeps	NC_026977.1	14805	4A:141, 5A:69, 6A:30, 7A:11, 8A:2, 9A:2, 10A:1	4T:117, 5T:33, 6T:15, 7T:8, 8T:2	4C:3, 5C:1, 6C:1, 8C:1	4G:6, 6G:2, 7G:1
Mollusca	Gastropoda	Nudibranchia	Dendronotidae	Melibe	Melibe leonina	NC_026987.1	14513	4A:75, 5A:23, 6A:3, 7A:1	4T:141, 5T:61, 6T:24, 7T:10, 8T:1	4C:10, 5C:2	4G:39, 5G:12, 6G:6
Chordata	Actinopteri	Perciformes	Synanceiidae	Synanceia	Synanceia verrucosa	NC_026989.1	16506	4A:63, 5A:30, 6A:4, 7A:3, 8A:1	4T:70, 5T:14, 6T:6	4C:59, 5C:18, 6C:4	4G:9, 5G:5, 6G:1
Chordata	Actinopteri	Scombriformes	Scombropidae	Scombrops	Scombrops boops	NC_026994.1	16518	4A:64, 5A:17, 6A:6, 7A:1	4T:54, 5T:16, 6T:2	4C:85, 5C:41, 6C:13, 9C:1	4G:23, 5G:14, 6G:2
Mollusca	Cephalopoda	Nautilida	Nautilidae	Allonautilus	Allonautilus scrobiculatus	NC_026997.1	16132	4A:111, 5A:45, 6A:17, 7A:9, 8A:5, 9A:2, 10A:2, 18A:1	4T:69, 5T:24, 6T:6, 7T:1, 11T:1	4C:90, 5C:30, 6C:12, 7C:5, 8C:5	4G:11, 5G:4
Arthropoda	Insecta	Neuroptera	Chrysopidae	Nothancyla	Nothancyla verreauxi	KP264629.1	14439	4A:110, 5A:44, 6A:19, 7A:6, 8A:4, 9A:1	4T:143, 5T:50, 6T:33, 7T:5, 8T:4, 9T:3, 10T:1	4C:11, 5C:1	4G:3, 5G:1
Cnidaria	Anthozoa	Corallimorpharia	Corallimorphidae	Corallimorphus	Corallimorphus profundus	KP938440.1	20488	4A:73, 5A:23, 6A:7, 7A:1	4T:207, 5T:83, 6T:34, 7T:14, 8T:8, 9T:3, 10T:2	4C:26, 5C:8, 6C:2, 7C:2, 8C:2, 10C:1	4G:95, 5G:47, 6G:19, 7G:13, 8G:5, 9G:3, 10G:2, 12G:1
Chordata	Actinopteri	Syngnathiformes	Syngnathidae	Dunckerocampus	Dunckerocampus dactyliophorus	KP301502.1	16661	4A:82, 5A:28, 6A:3, 7A:2, 8A:1	4T:57, 5T:16, 6T:6, 7T:3, 8T:1, 10T:1	4C:80, 5C:43, 6C:17, 7C:2	4G:15, 5G:17, 6G:3
Arthropoda	Malacostraca	Isopoda	Cylisticidae	Cylisticus	Cylisticus convexus	KR013002.1	14154	4A:106, 5A:40, 6A:14, 7A:4, 9A:1, 10A:1	4T:112, 5T:49, 6T:23, 7T:9, 8T:5, 9T:1, 10T:1, 11T:1	4C:17, 5C:5, 6C:1	4G:39, 5G:9, 6G:3, 7G:1
Chordata	Amphibia	Anura	Leiopelmatidae	Leiopelma	Leiopelma hochstetteri	NC_027072.1	17175	4A:72, 5A:35, 6A:4, 7A:1	4T:67, 5T:26, 6T:4, 7T:3, 8T:1	4C:63, 5C:25, 6C:8, 7C:3, 8C:2	4G:25, 5G:5
[truncated: 5,624 more rows]
