# Supplementary material
Source: Research Square preprint supplement (doi:10.21203/rs.3.rs-9835208/v1)
Supplement: Supplementary file 2 [file 010e5f1948ac34ef55043f19.docx]

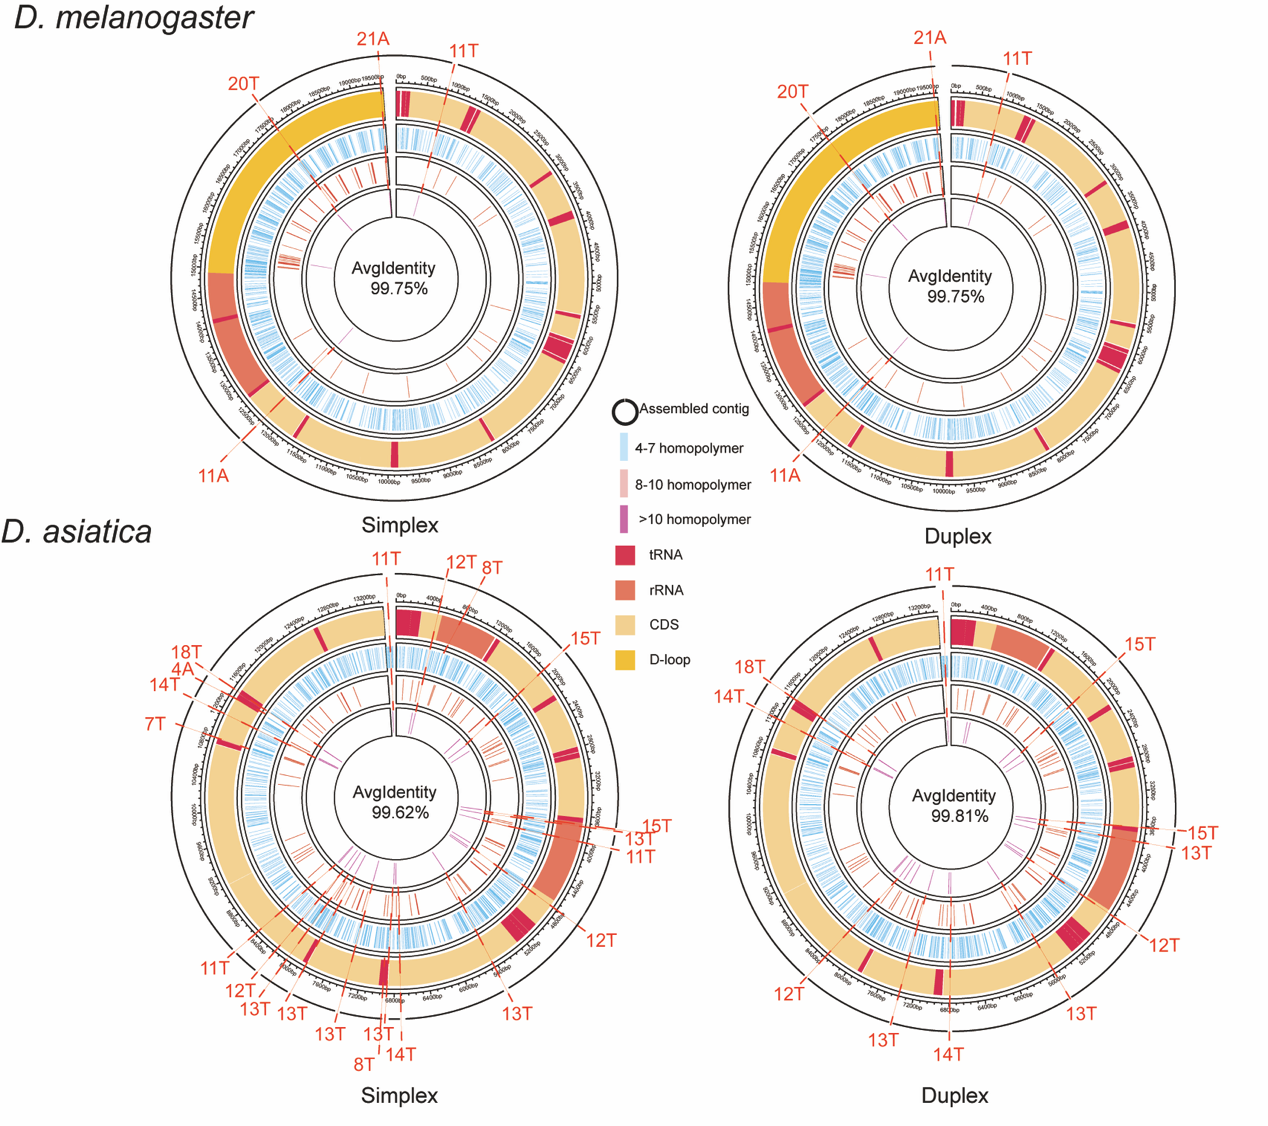


**Figure S1.** Mitochondrial genome assemblies generated from duplex reads contained fewer insertion–deletion (indel) errors compared with those assembled from simplex reads.


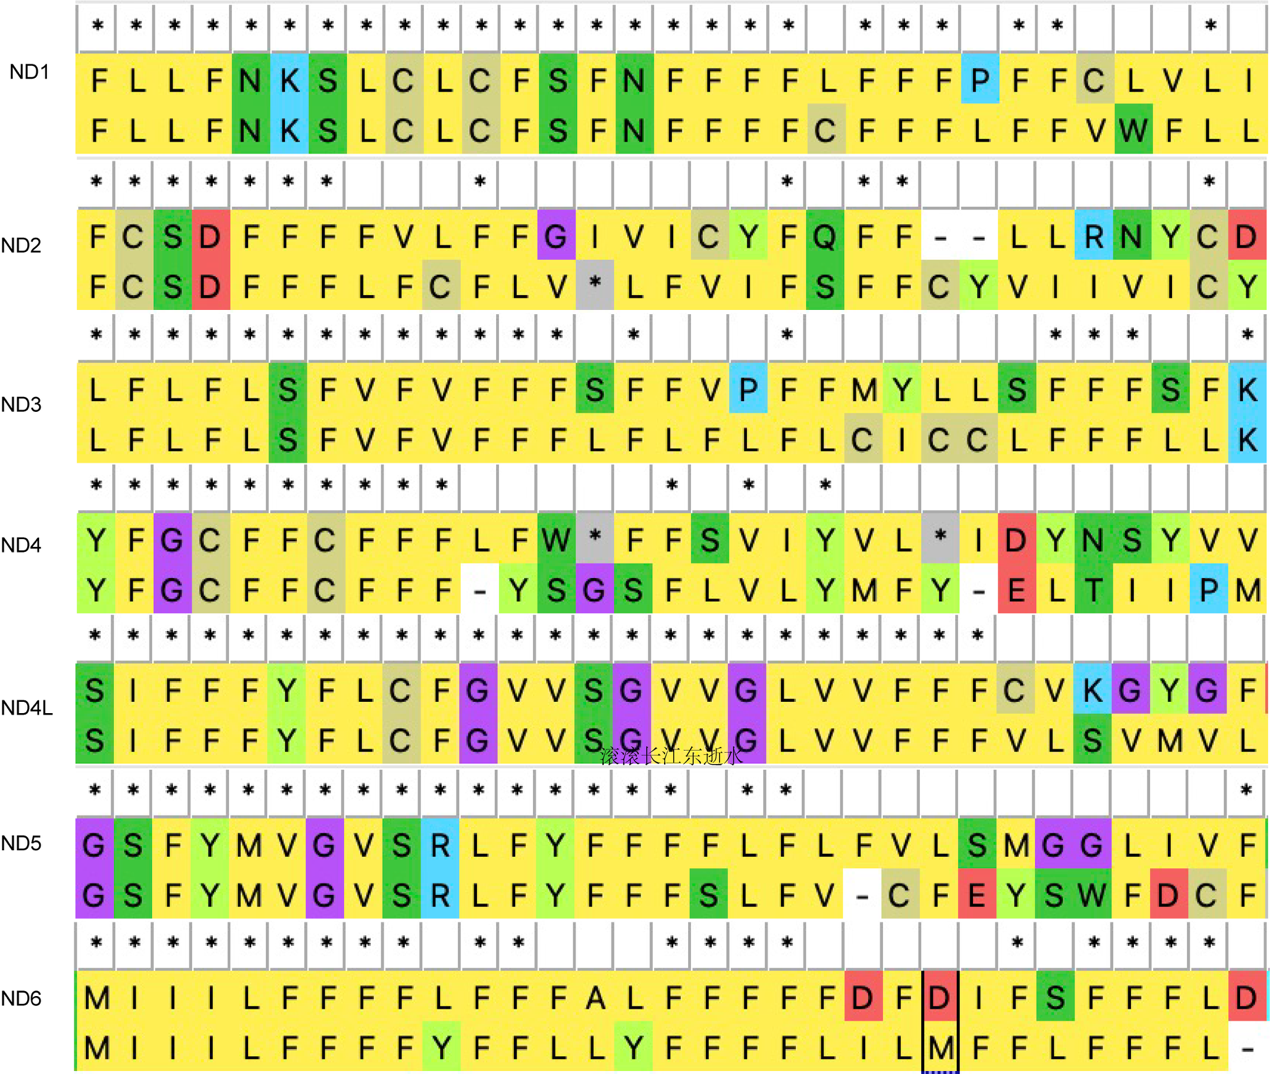


**Figure S2.** Deletions caused by long homopolymer tracts within CDS regions lead to downstream frameshift mutations. For each CDS region, the upper sequence represents the original coding sequence, whereas the lower sequence shows the frameshift mutation caused by homopolymer-associated deletion
