# Supplementary material
Source: Research Square preprint supplement (doi:10.21203/rs.3.rs-9835208/v1)
Supplement: Supplementary file 3 [file 52971120e0ceb82ff94cb427.xlsx]

## Sheet: Sheet2
Supplementary Table 1. The detailed information of datasets
Description	SRA number	Kit	Model	Mean length	Mean quality	Median length	Median quality	Read length N50	>Q10 percentage	Number of reads
Homo sapiens	SRR34901567	SQK-LSK114	dna_r10.4.1_e8.2_400bps_sup@v4.1.0	26462.3	13	16621	17.8	98019	0.883	38371
Danio rerio	SRR34794043	SQK-ULK114	NA	5655.6	16.1	1526	18.3	16610	0.993	2591
Kyphosus azureus	SRR24529093	SQK-LSK114	dna_r10.4.1_e8.2_260bps_sup	11258.7	16.9	7426	19.8	20504	0.995	2261350
Caenorhabditis elegans	to be released soon	SQK-NBD-114.24	dna_r10.4.1_e8.2_400bps_sup@v5.2.0	9672.6	13.3	2158	20.1	138148	0.866	24393
Dirofilaria asiatica_Simplex	to be released soon	SQK-NBD-114.24	dna_r10.4.1_e8.2_400bps_sup@v5.2.0	760.6	14	522	15.7	695	0.951	2717568
Dirofilaria asiatica_Duplex	Unpublished	SQK-NBD-114.24	dna_r10.4.1_e8.2_400bps_sup@v5.2.0	5727.9	18.8	5898	24.1	5981	0.989	1918
Drosophila melanogaster_Simplex	SRR23215007	SQK-LSK114	Guppy 6.4.2	10195.9	15.8	3438	17.9	27190	0.996	13956
Drosophila melanogaster_Duplex	SRR23215008	SQK-LSK114	Guppy 6.4.2	7260.2	26.1	2795	29.1	18606	1	885
3
