# Supplementary material
Source: Research Square preprint supplement (doi:10.21203/rs.3.rs-9835208/v1)
Supplement: Supplementary file 4 [file aa2e9fe7f056df4ed949b363.xlsx]

## Sheet: Supplementary Table3
Supplementary Table 3. Base corrections identified by homopolish in the PX108868
Gene	Before homopolish		After homopolish		Homopolymer length
	Position	Base	Position	Base
tRNA-Ser1	68	T	67	.	8T
ND2	487	.	487	T	13T
Non-coding region	966	.	967	T	13T
Non-coding region	966	.	968	T	13T
ND4	1145	.	1148	T	13T
ND4	1274	.	1278	T	12T
ND4	1483	.	1488	T	11T
Non-coding region	3909	T	3913	.	7T
ND6	4277	.	4282	T	14T
Non-coding region	4475	A	4479	.	4A
Non-coding region	4541	.	4546	T	18T
Non-coding region	4541	.	4547	T	18T
Non-coding region	4541	.	4548	T	18T
Non-coding region	4541	.	4549	T	18T
Non-coding region	6583	.	6592	T	11T
Non-coding region	6583	.	6593	T	11T
ND4L	7314	.	7325	T	12T
12S	7764	.	7776	T	8T
ND1	8573	.	8586	T	15T
16S	10477	.	10491	T	15T
16S	10565	.	10580	T	13T
16S	10565	.	10581	T	13T
16S	10726	.	10743	T	11T
ND3	11453	.	11471	T	12T
ND5	12292	.	12311	T	13T
ND5	12292	.	12312	T	13T
ND5	13568	.	13589	T	14T
ND5	13568	.	13590	T	14T
ND5	13568	.	13591	T	14T
ND5	13619	.	13643	T	13T
